# Supplementary material for: A Convenient, Rapid, Conventional Heating Route to MIDA Boronates
Source: MDPI journal article supplement (doi:10.3390/molecules27165052), 2022-08-09

## A Convenient, Rapid, Conventional Heating Route to MIDA Boronates

Andrew McGown <sup>1</sup>, Anthony K. Edmonds <sup>1</sup>, Daniel Guest <sup>1</sup>, Verity L. Holmes <sup>1</sup>, Chris Dadswell <sup>1</sup>, Ramón González-Méndez <sup>1</sup>, Charles A. I. Goodhall <sup>2</sup>, Mark C. Bagley <sup>1</sup>, Barnaby W. Greenland <sup>1</sup>, and John Spencer <sup>1,\*</sup>

### Supporting Information

*4-(6-Methyl-4,8-dioxo-1,3,6,2-dioxazaborocan-2-yl)benzenesulfonamide 8a*

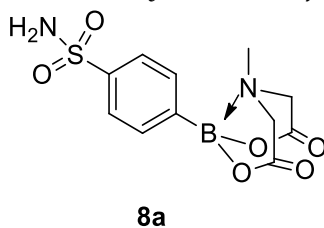

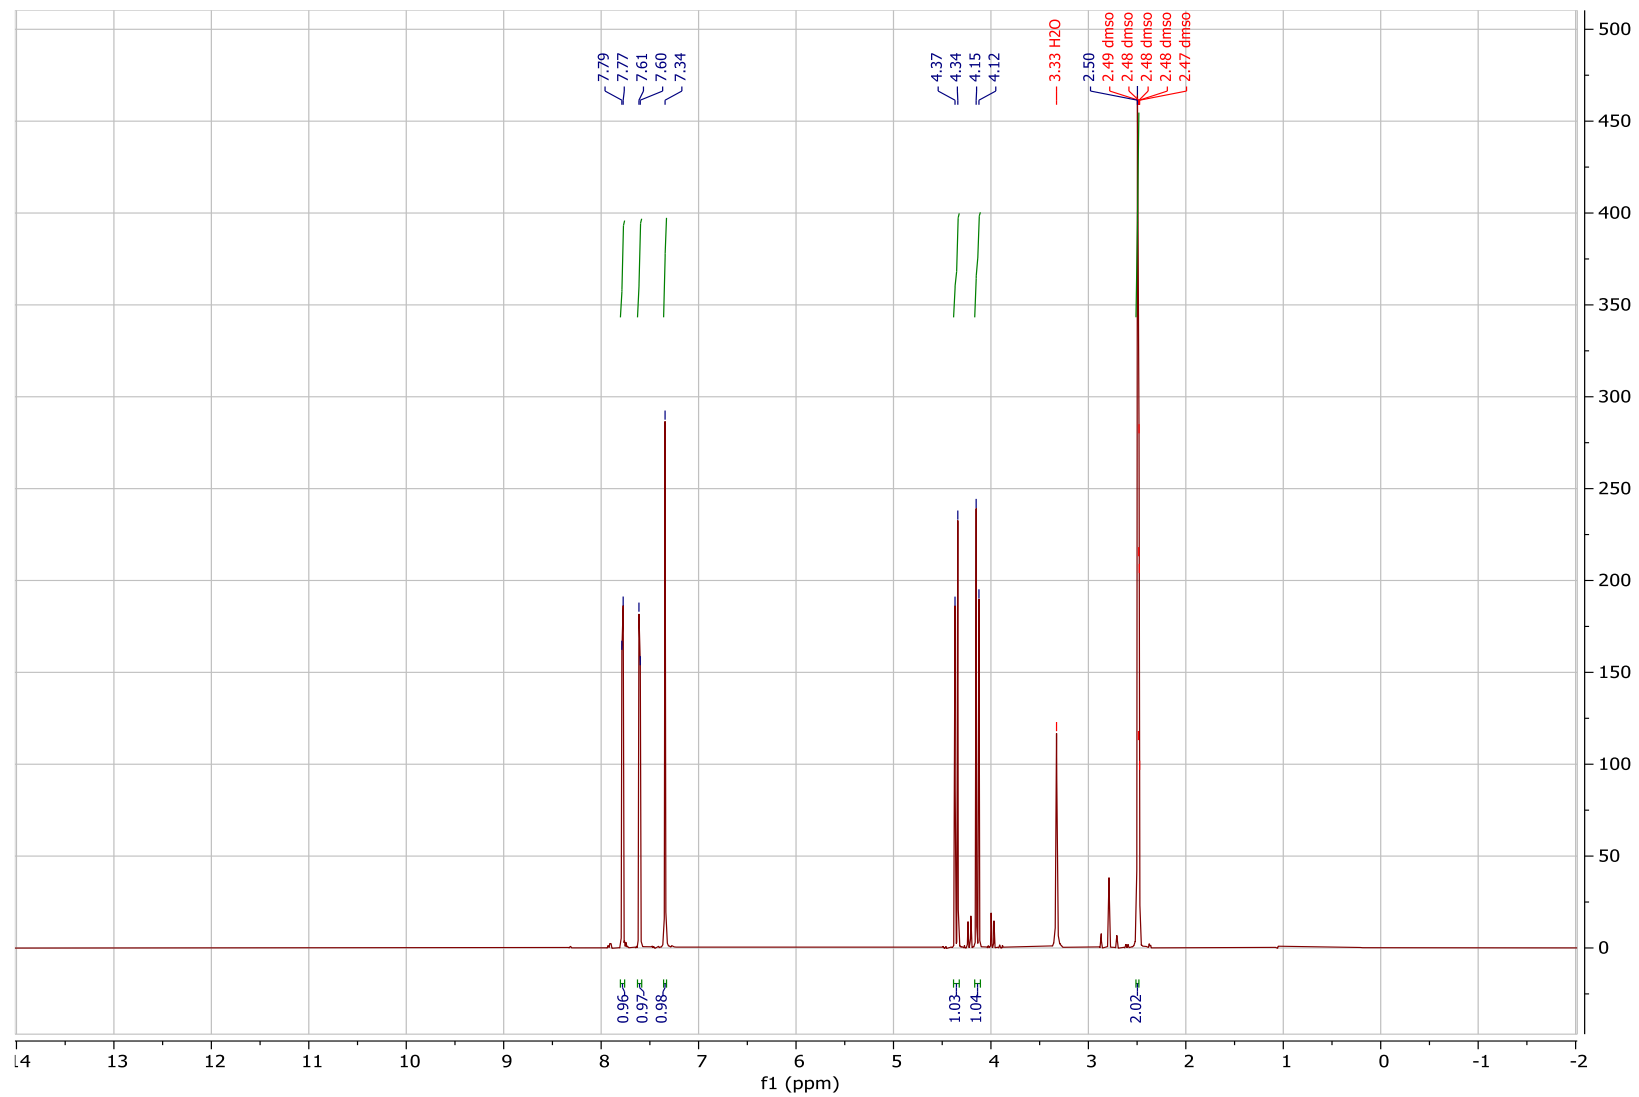

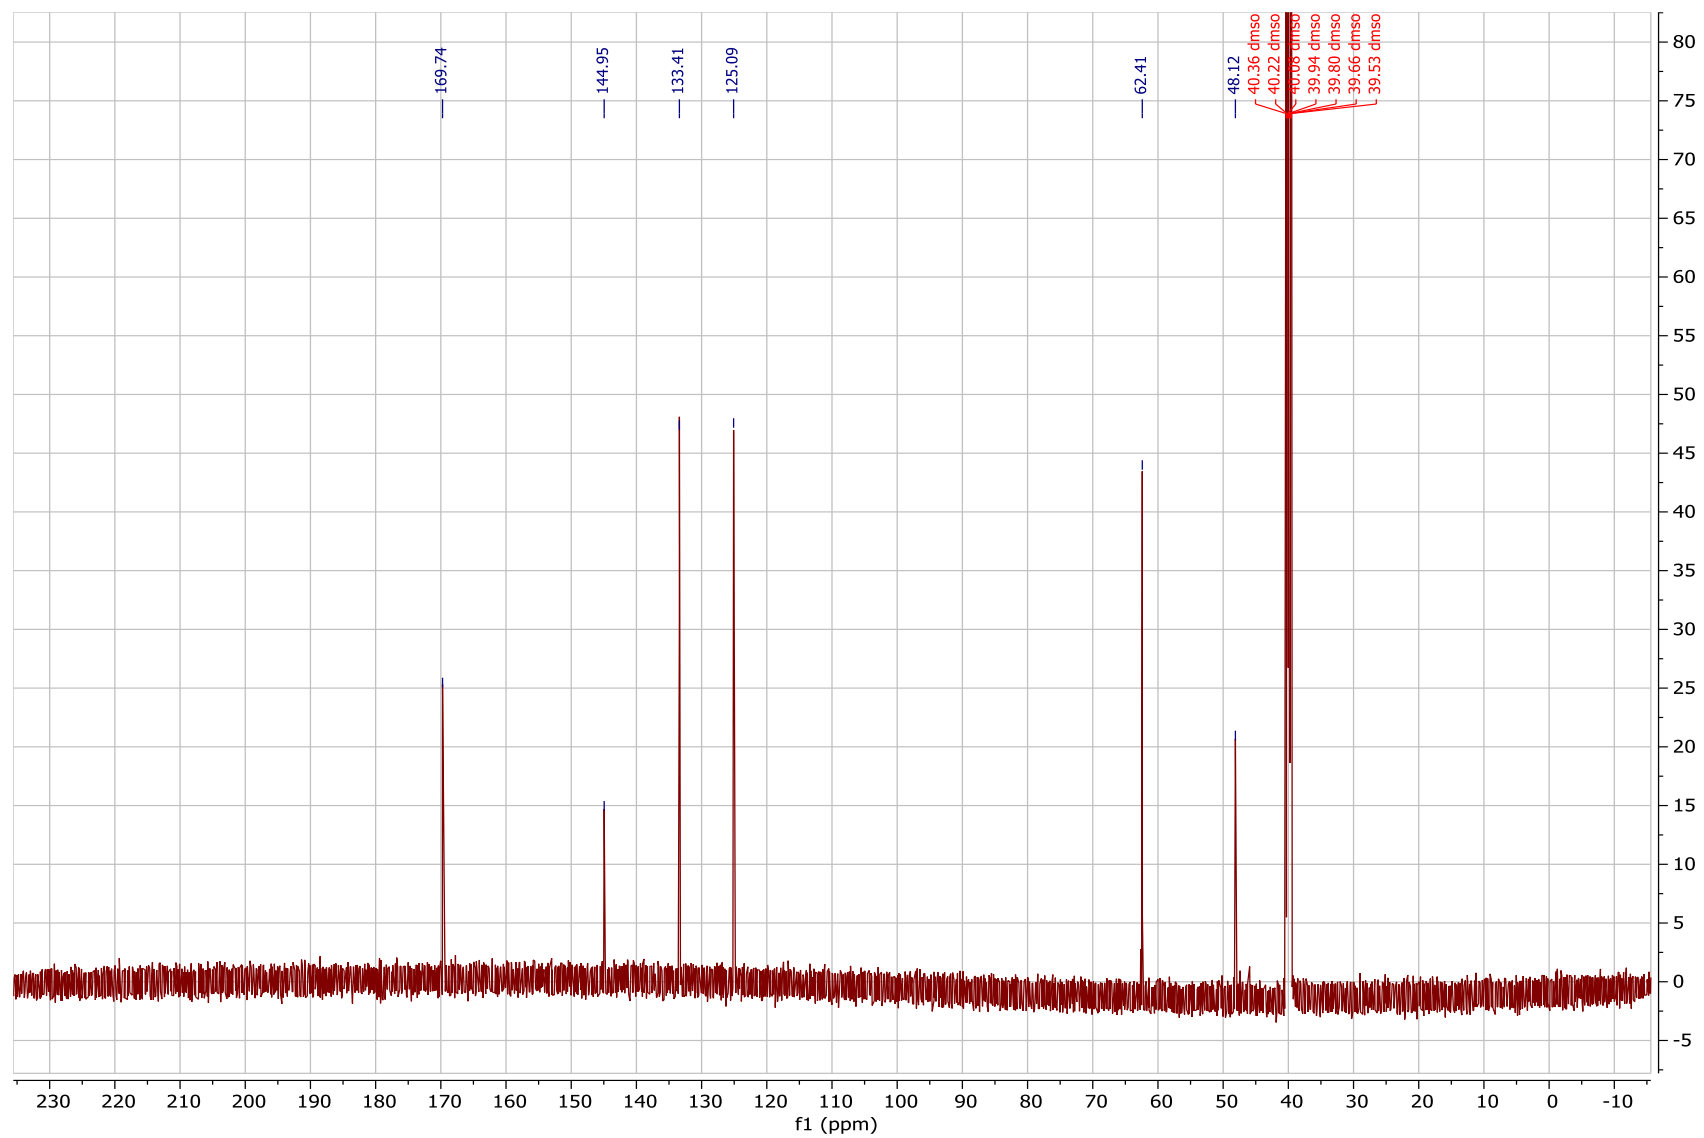

### Single Mass Analysis

Tolerance = 5.0 mDa / DBE: min = -1.5, max = 120.0

Element prediction: Off

Number of isotope peaks used for i-FIT = 3

Monoisotopic Mass, Even Electron Ions

109 formula(e) evaluated with 1 results within limits (up to 20 best isotopic matches for each mass)

Elements Used:

| Mass     | Calc. Mass | mDa | PPM | DBE | Formula             | i-FIT | i-FIT Norm | Fit Conf % | C  | H  | 11B | N | O | S |
|----------|------------|-----|-----|-----|---------------------|-------|------------|------------|----|----|-----|---|---|---|
| 330.0939 | 330.0931   | 0.8 | 2.4 | 5.5 | C11 H17 11B N3 O6 S | 110.7 | n/a        | n/a        | 11 | 17 | 1   | 3 | 6 | 1 |

INTER037

29Sep2021\_IG24 68 (0.688) Cm (66:71)

1: TOF MS ES+  
3.34e+004

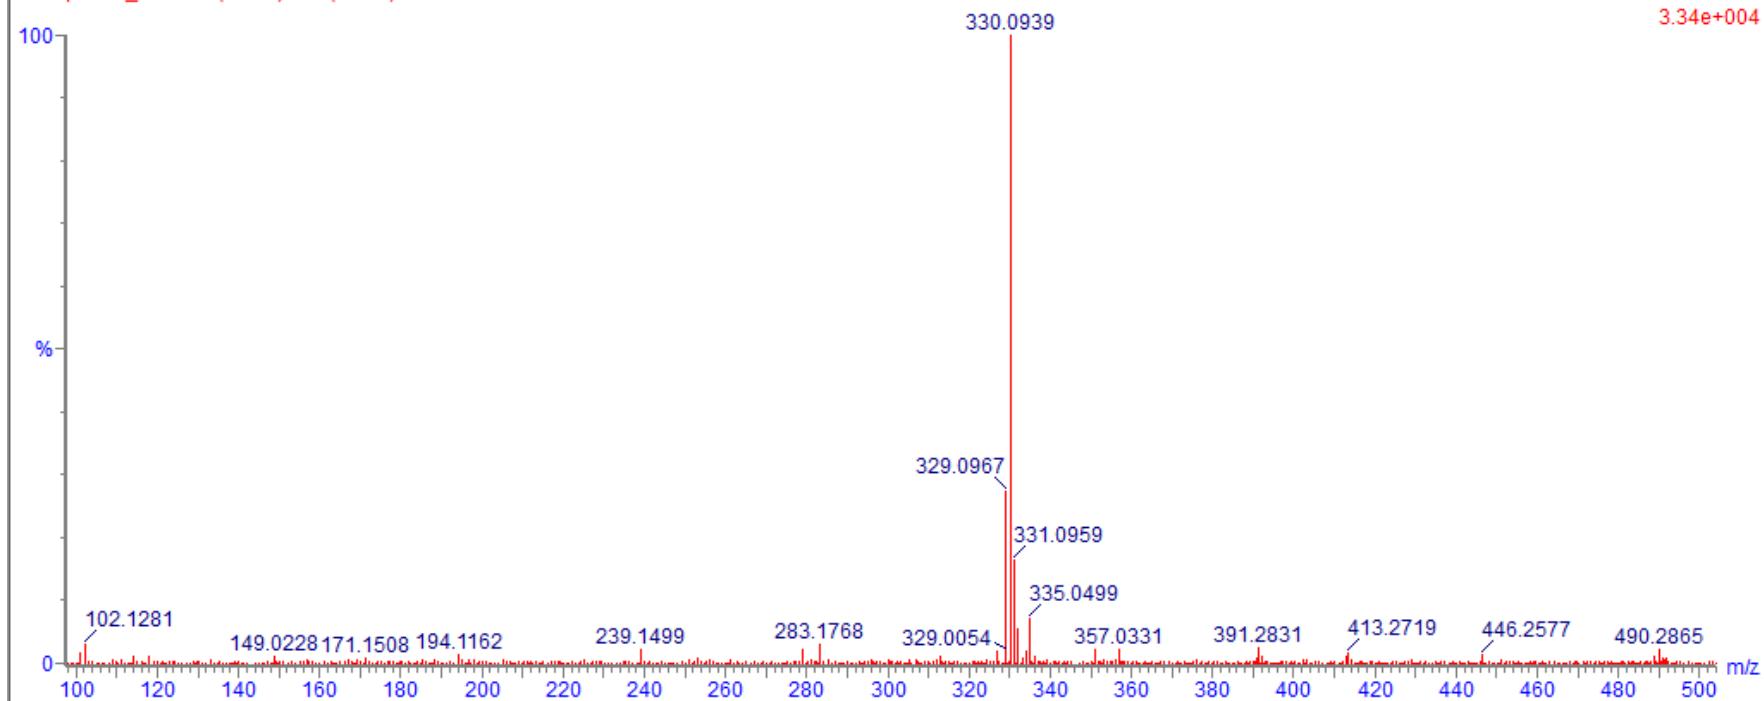

INTER037

29Sep2021\_IG24

1: TOF MS ES+  
330.094 0.0500Da  
1.15e4

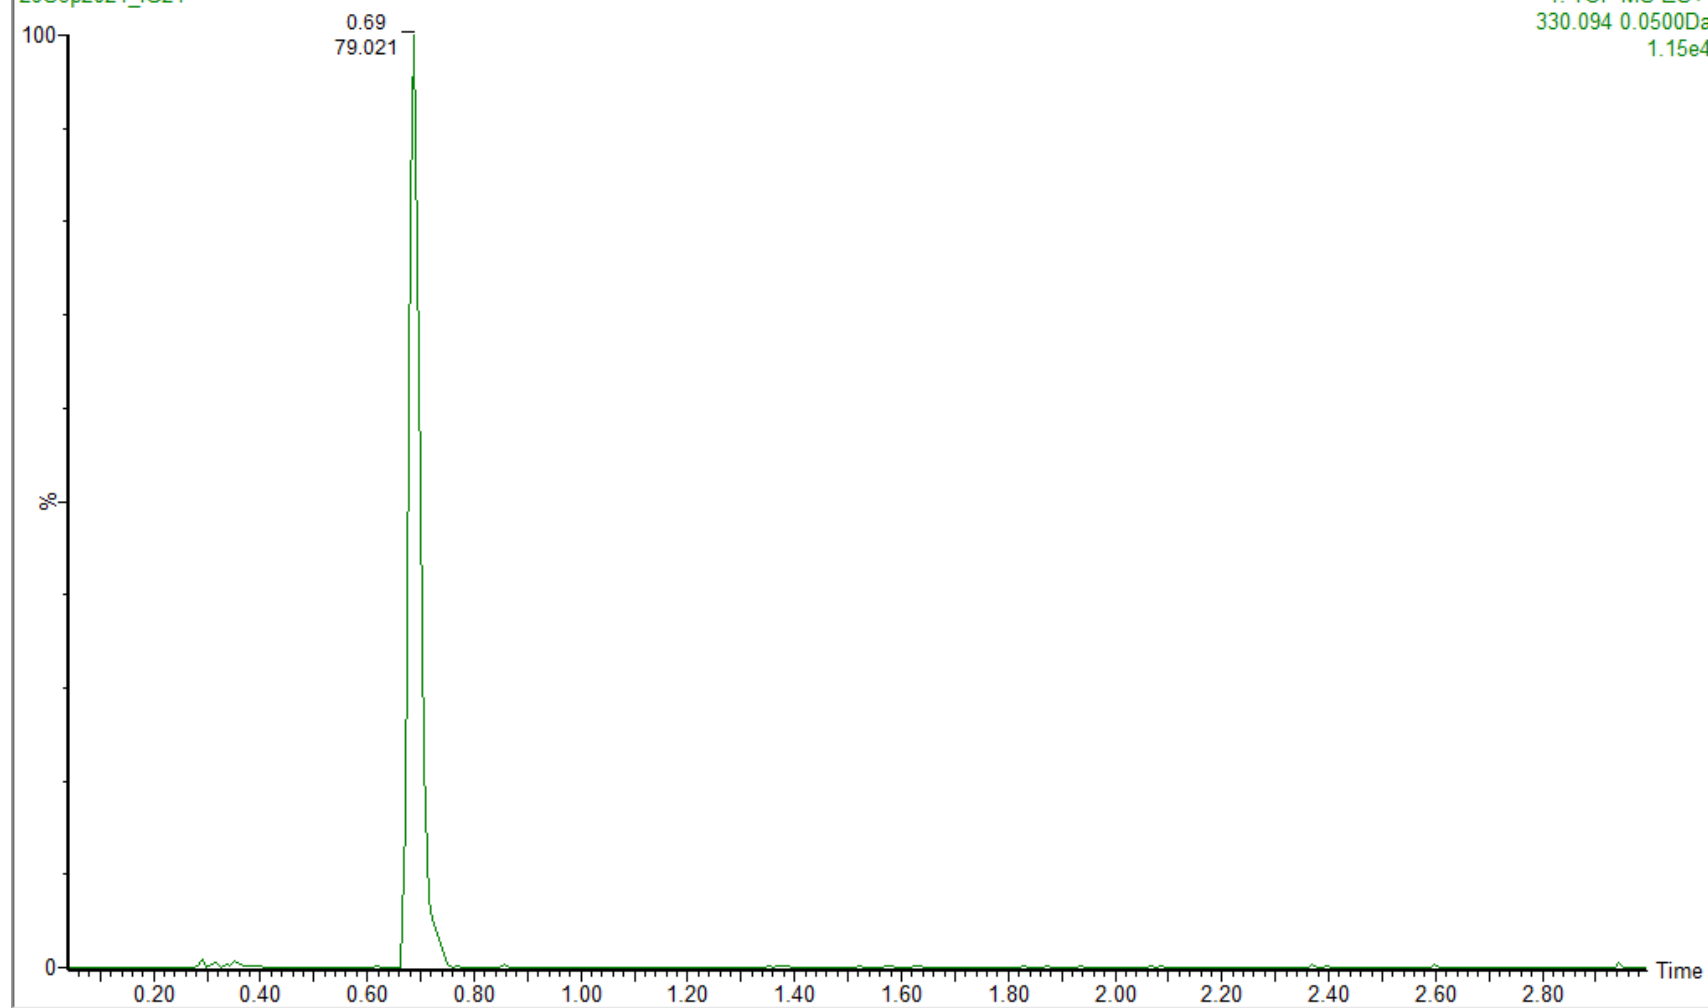

**2-(3-Fluoro-4-methoxyphenyl)-6-methyl-1,3,6,2-dioxazaborocane-4,8-dione 8b**

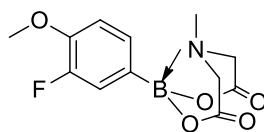

**8b**

2-(3-fluoro-4-methoxyphenyl)-6-methyl-1,3,6,2-dioxazaborocane-4,8-dione

Chemical Formula:  $C_{12}H_{13}BFNO_5$

Molecular Weight: 281.0447

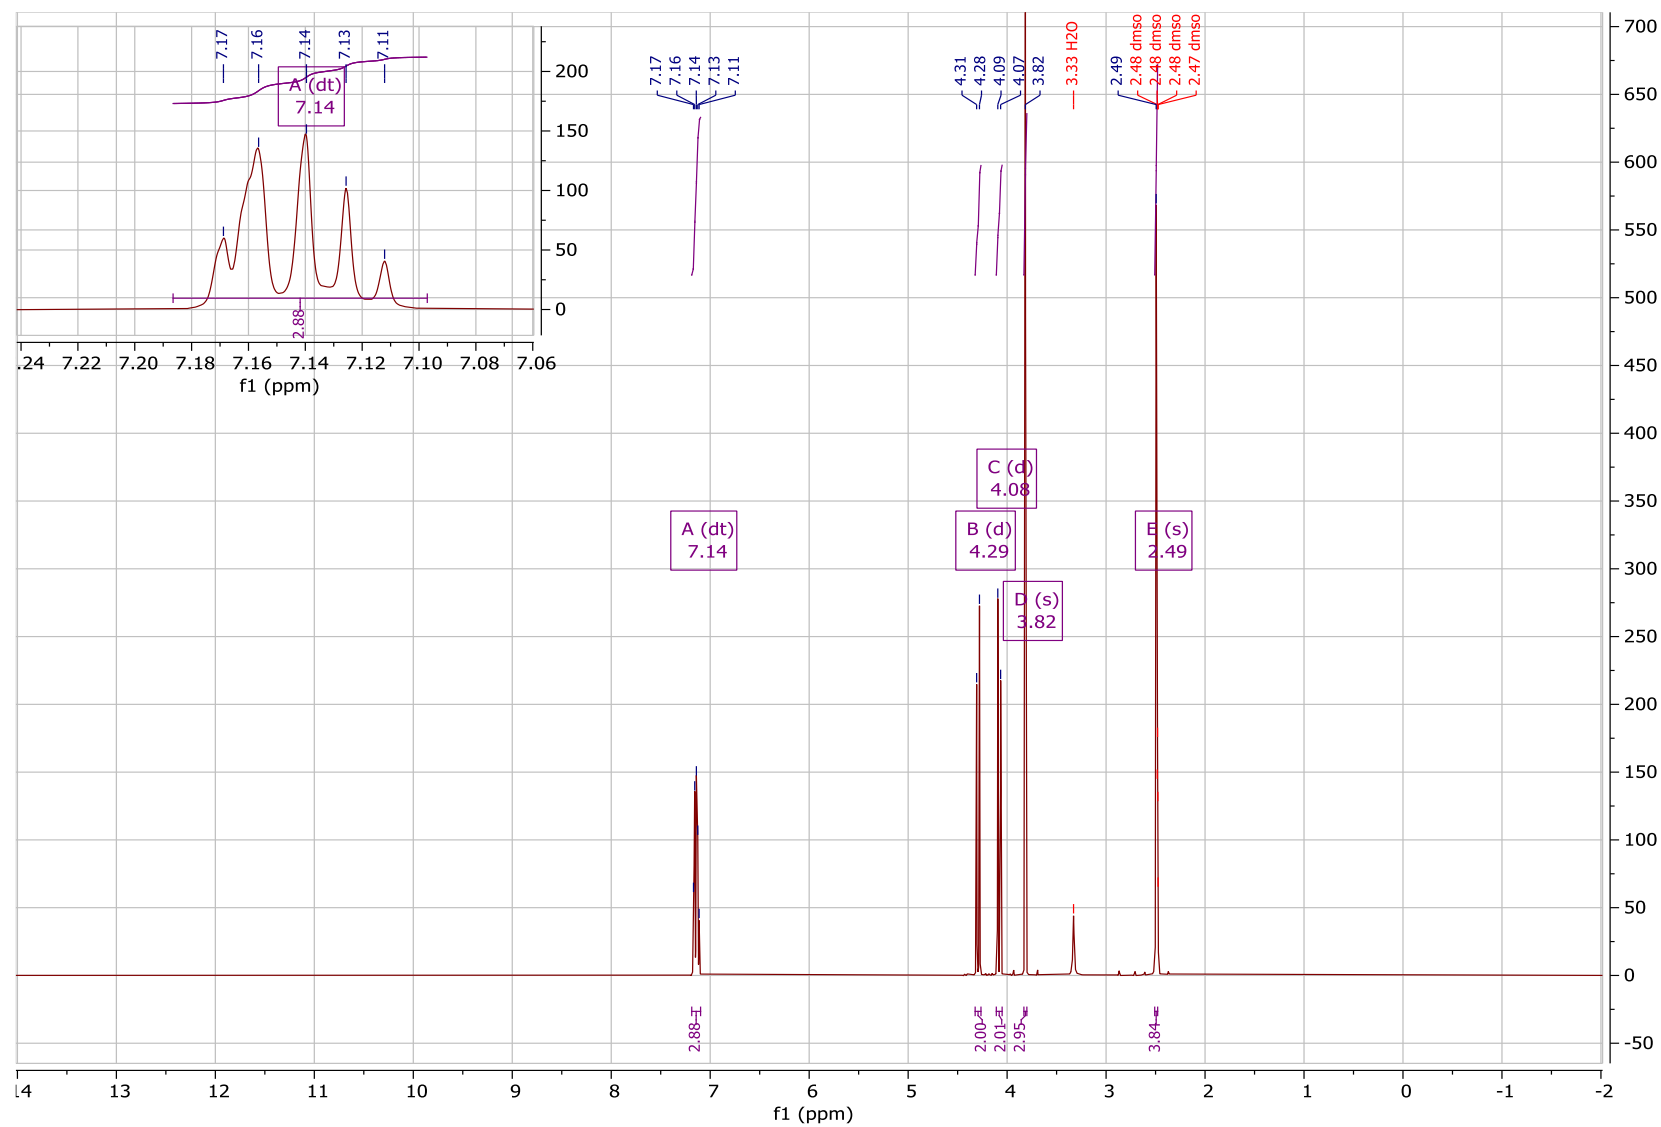

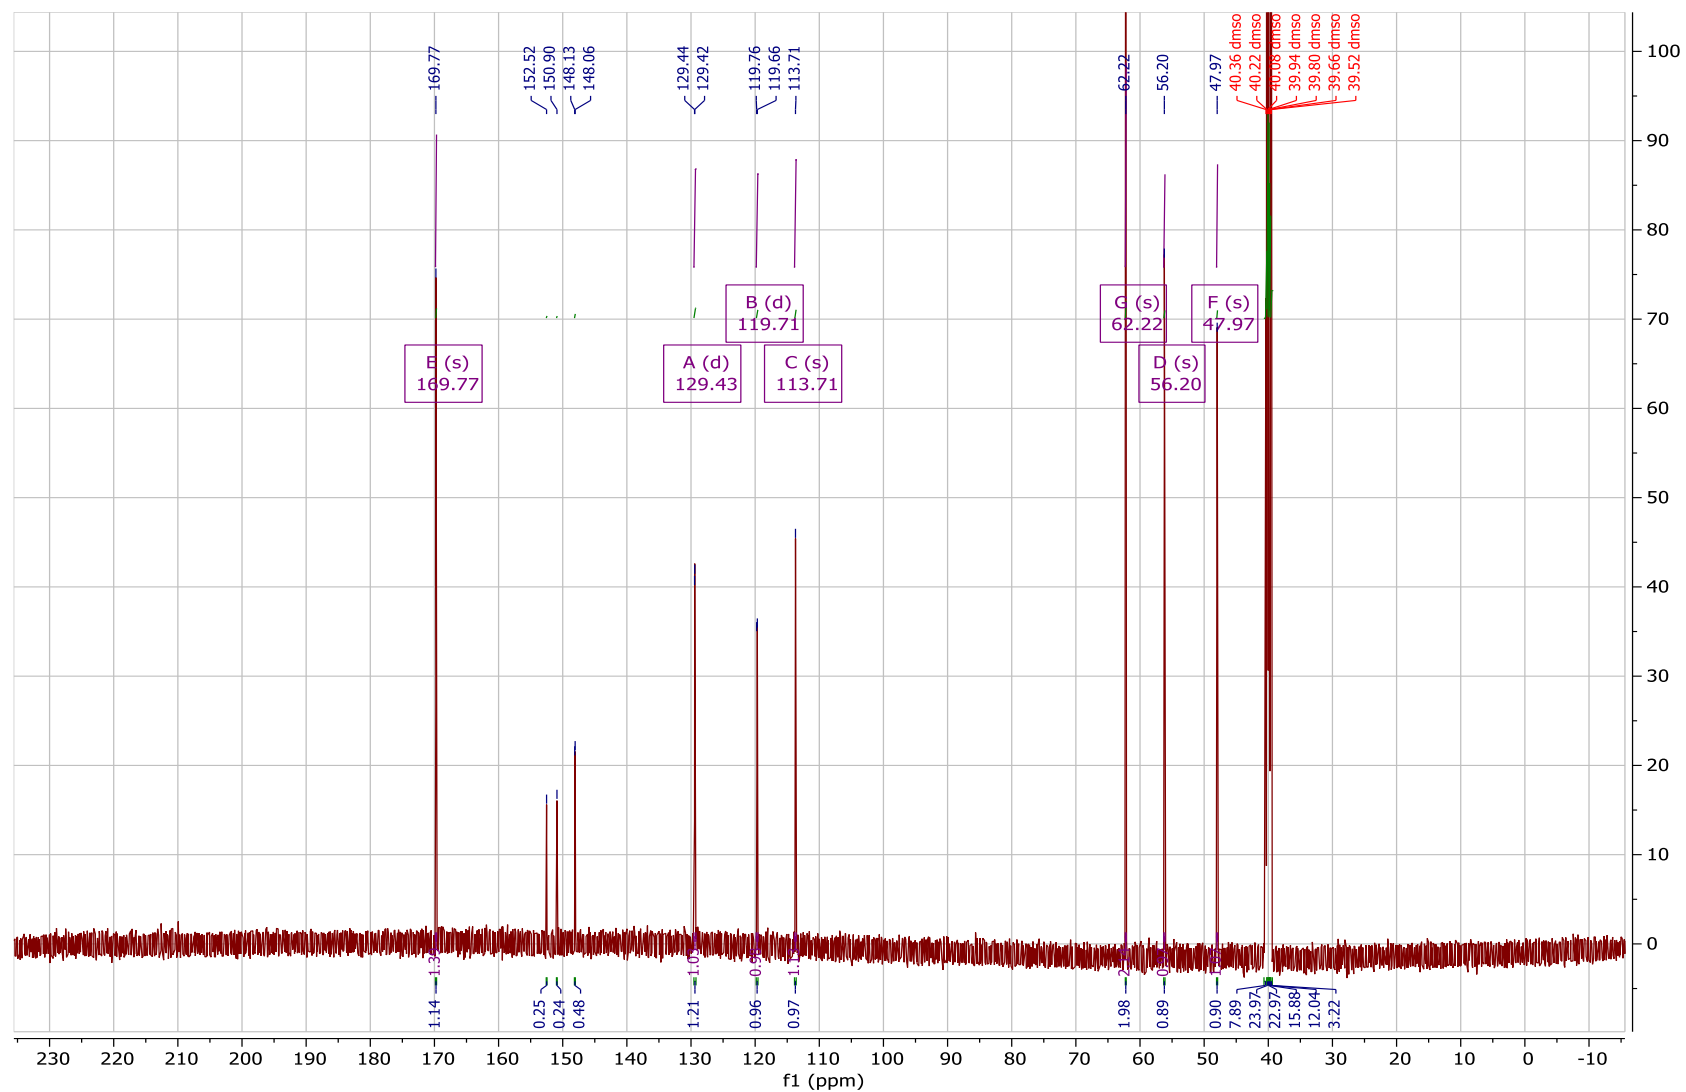



### Single Mass Analysis

Tolerance = 5.0 mDa / DBE: min = -1.5, max = 120.0

Element prediction: Off

Number of isotope peaks used for i-FIT = 3

Monoisotopic Mass, Even Electron Ions

68 formula(e) evaluated with 1 results within limits (up to 20 best isotopic matches for each mass)

Elements Used:

| Mass     | Calc. Mass | mDa  | PPM  | DBE | Formula             | i-FIT | i-FIT Norm | Fit Conf % | C  | H  | 11B | N | O | F |
|----------|------------|------|------|-----|---------------------|-------|------------|------------|----|----|-----|---|---|---|
| 299.1212 | 299.1215   | -0.3 | -1.0 | 5.5 | C12 H17 11B N2 O5 F | 179.6 | n/a        | n/a        | 12 | 17 | 1   | 2 | 5 | 1 |

INTER038

29Sep2021\_IG26 102 (1.024) Cm (100:106)

1: TOF MS ES+  
1.13e+005

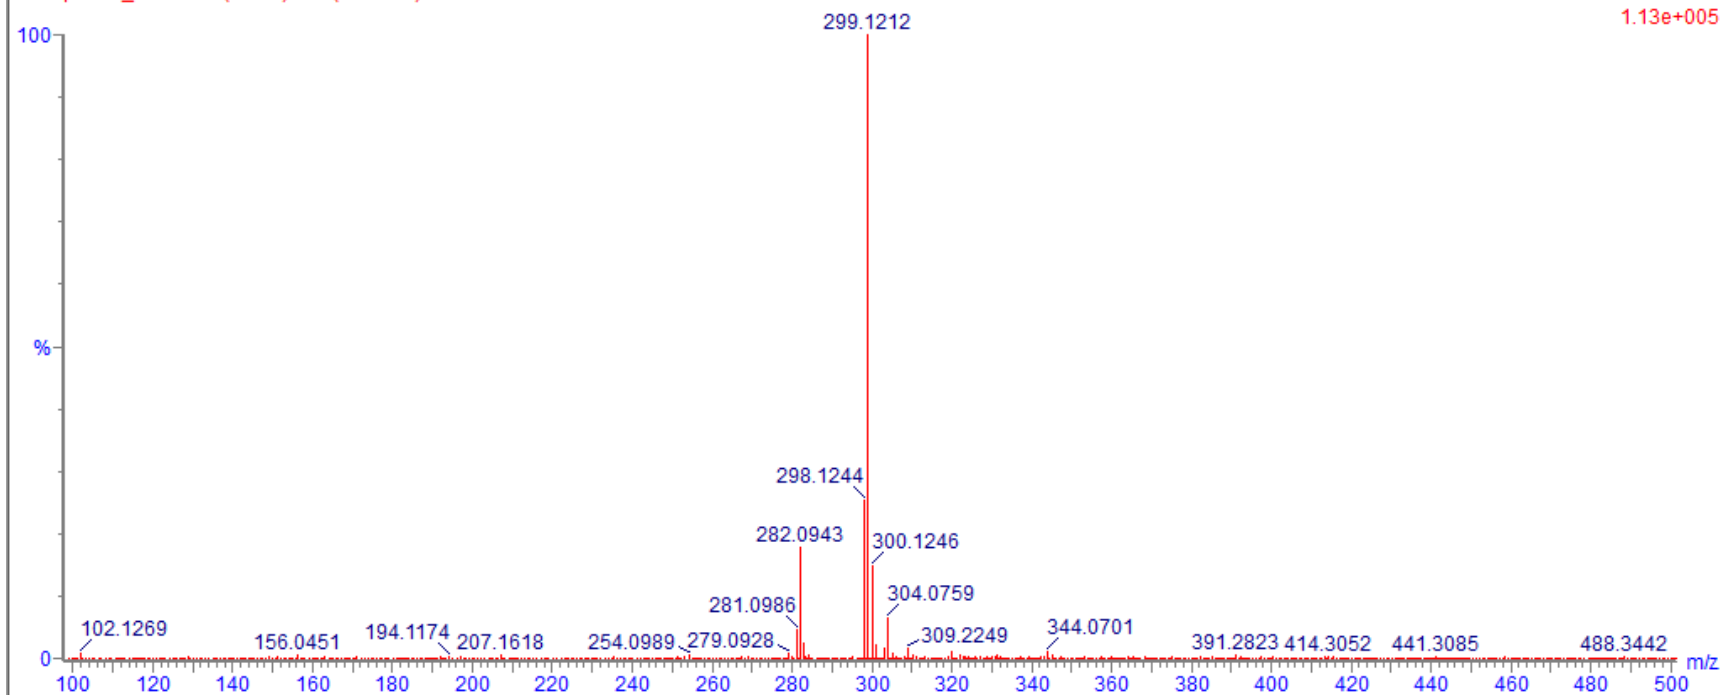

INTER038

29Sep2021\_IG26

1: TOF MS ES+  
299.121 0.0500Da  
4.14e4

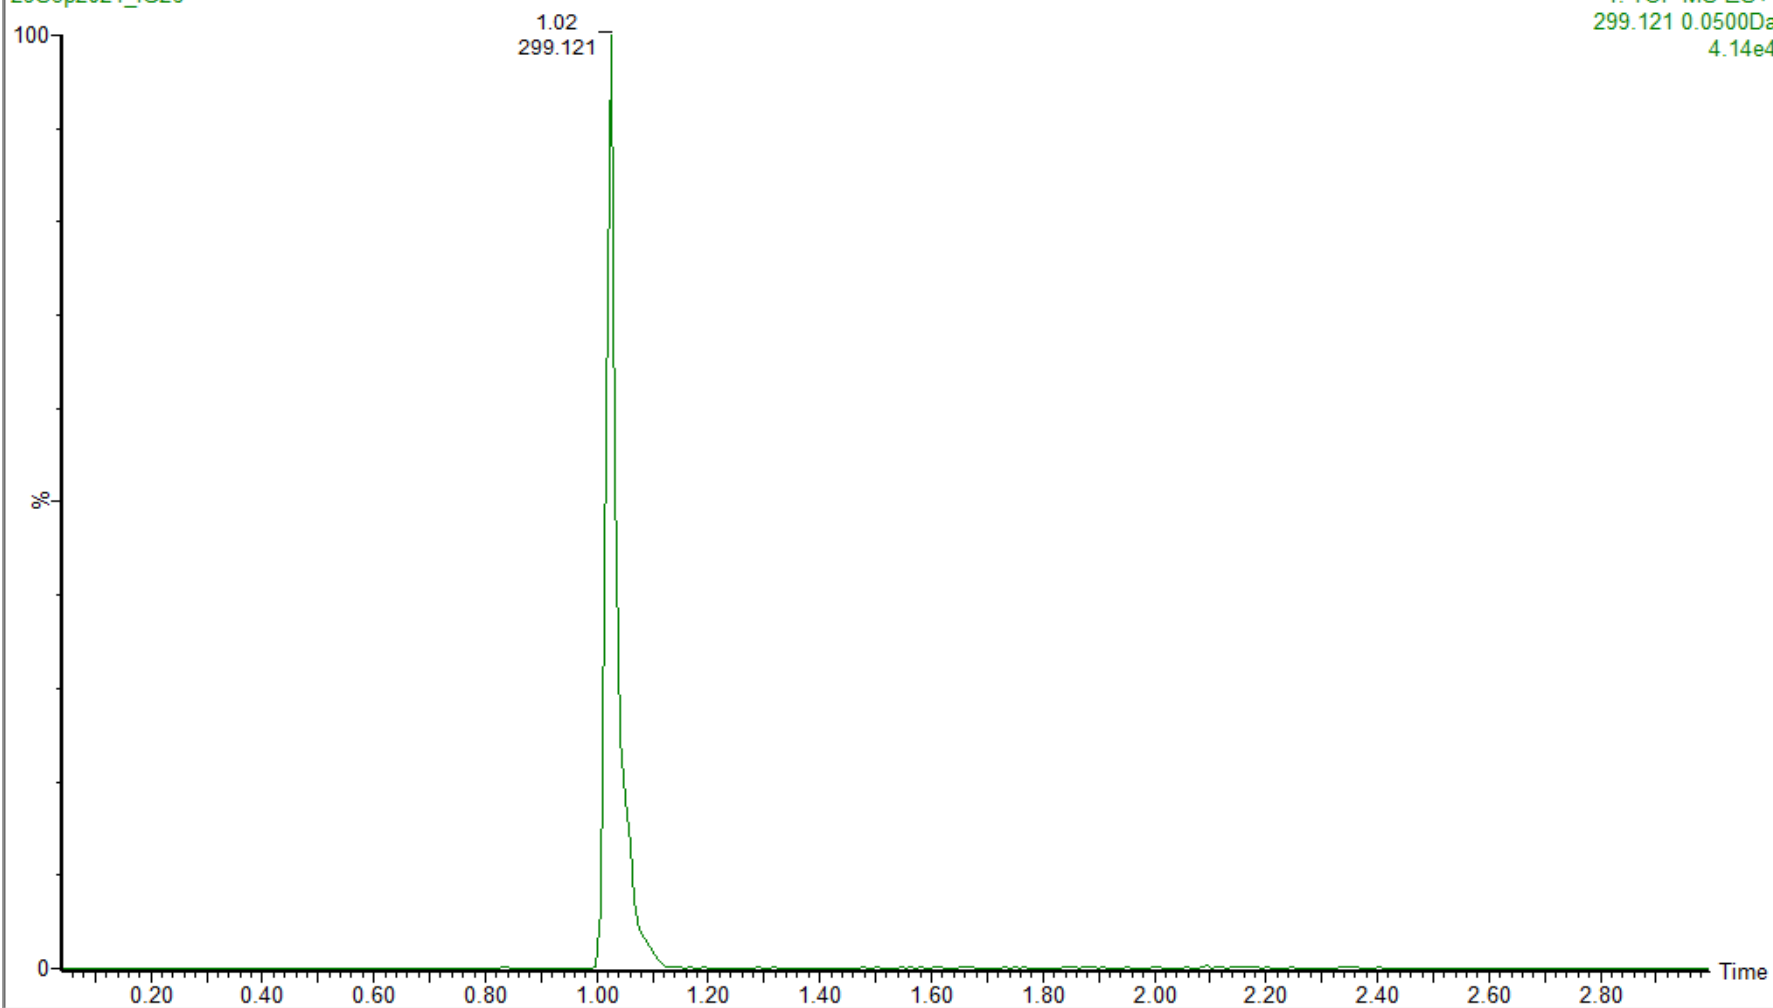

**2-(3-Ethoxyphenyl)-6-methyl-1,3,6,2-dioxazaborocane-4,8-dione 8c**

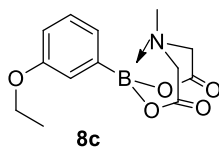

2-(3-ethoxyphenyl)-6-methyl-1,3,6,2-dioxazaborocane-4,8-dione

Chemical Formula:  $C_{13}H_{16}BNO_5$

Molecular Weight: 277.0808

Yield = 196.9 mg (71%)

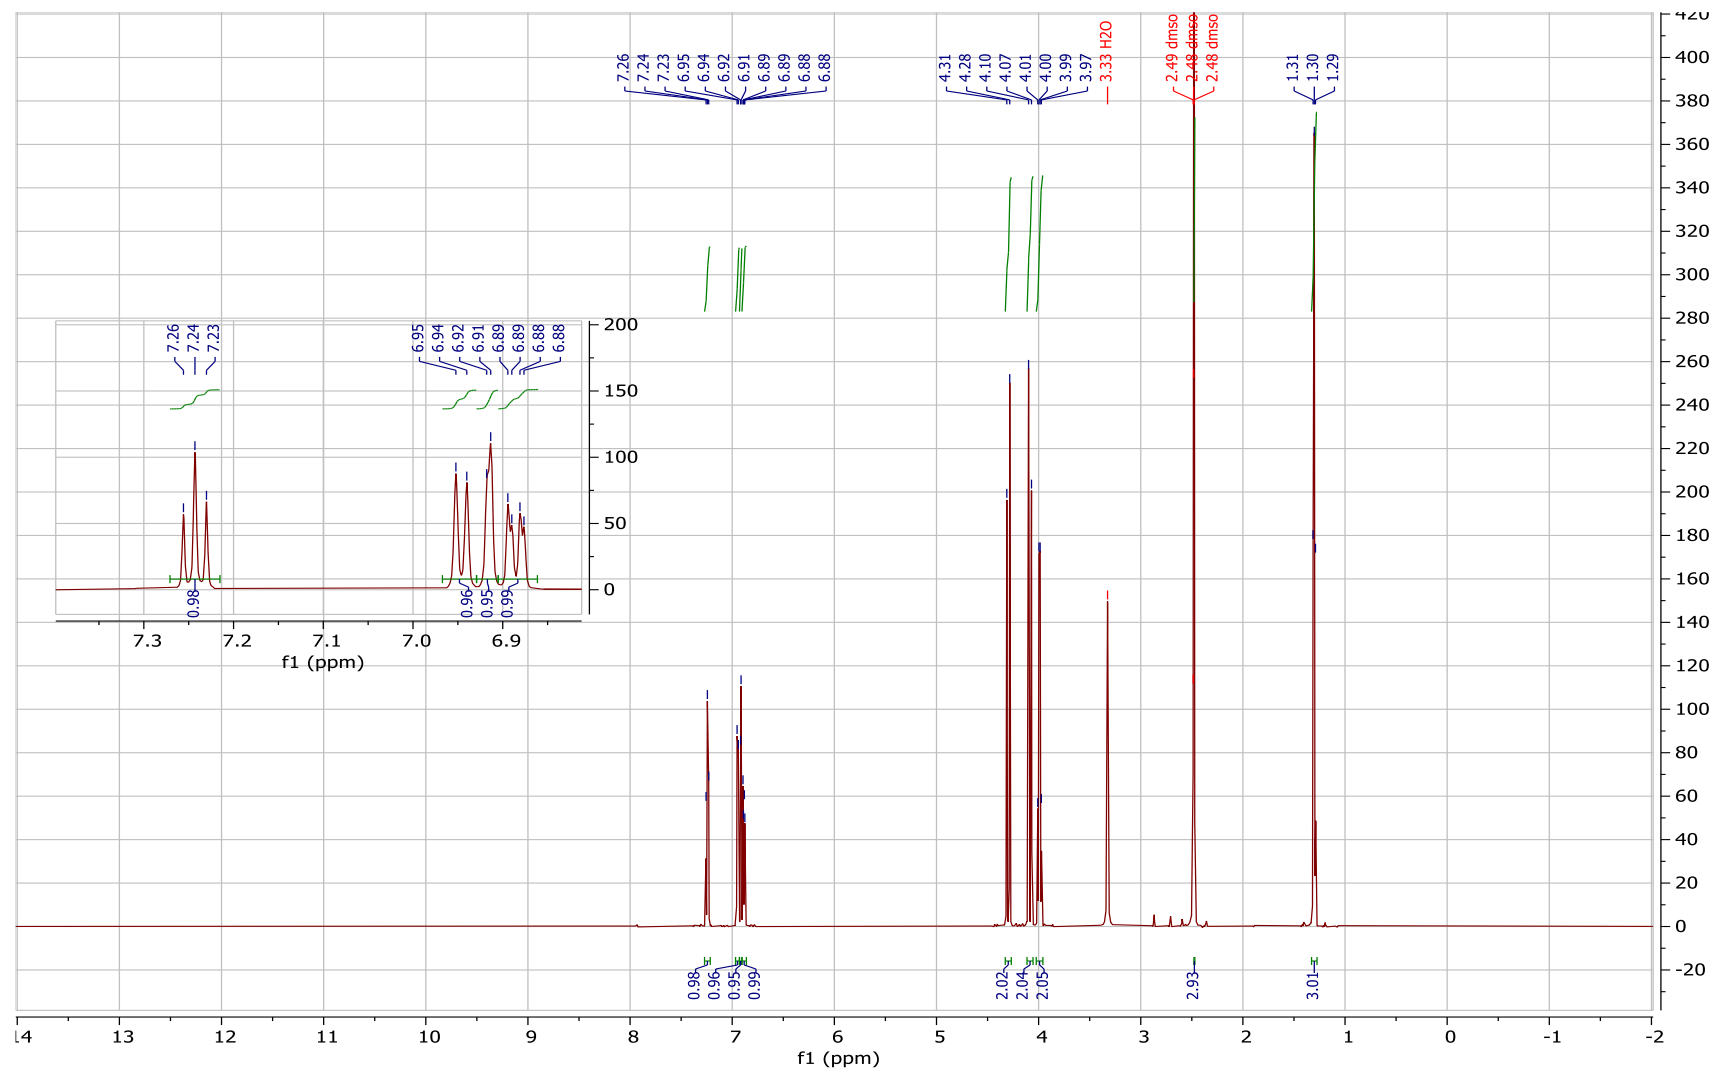

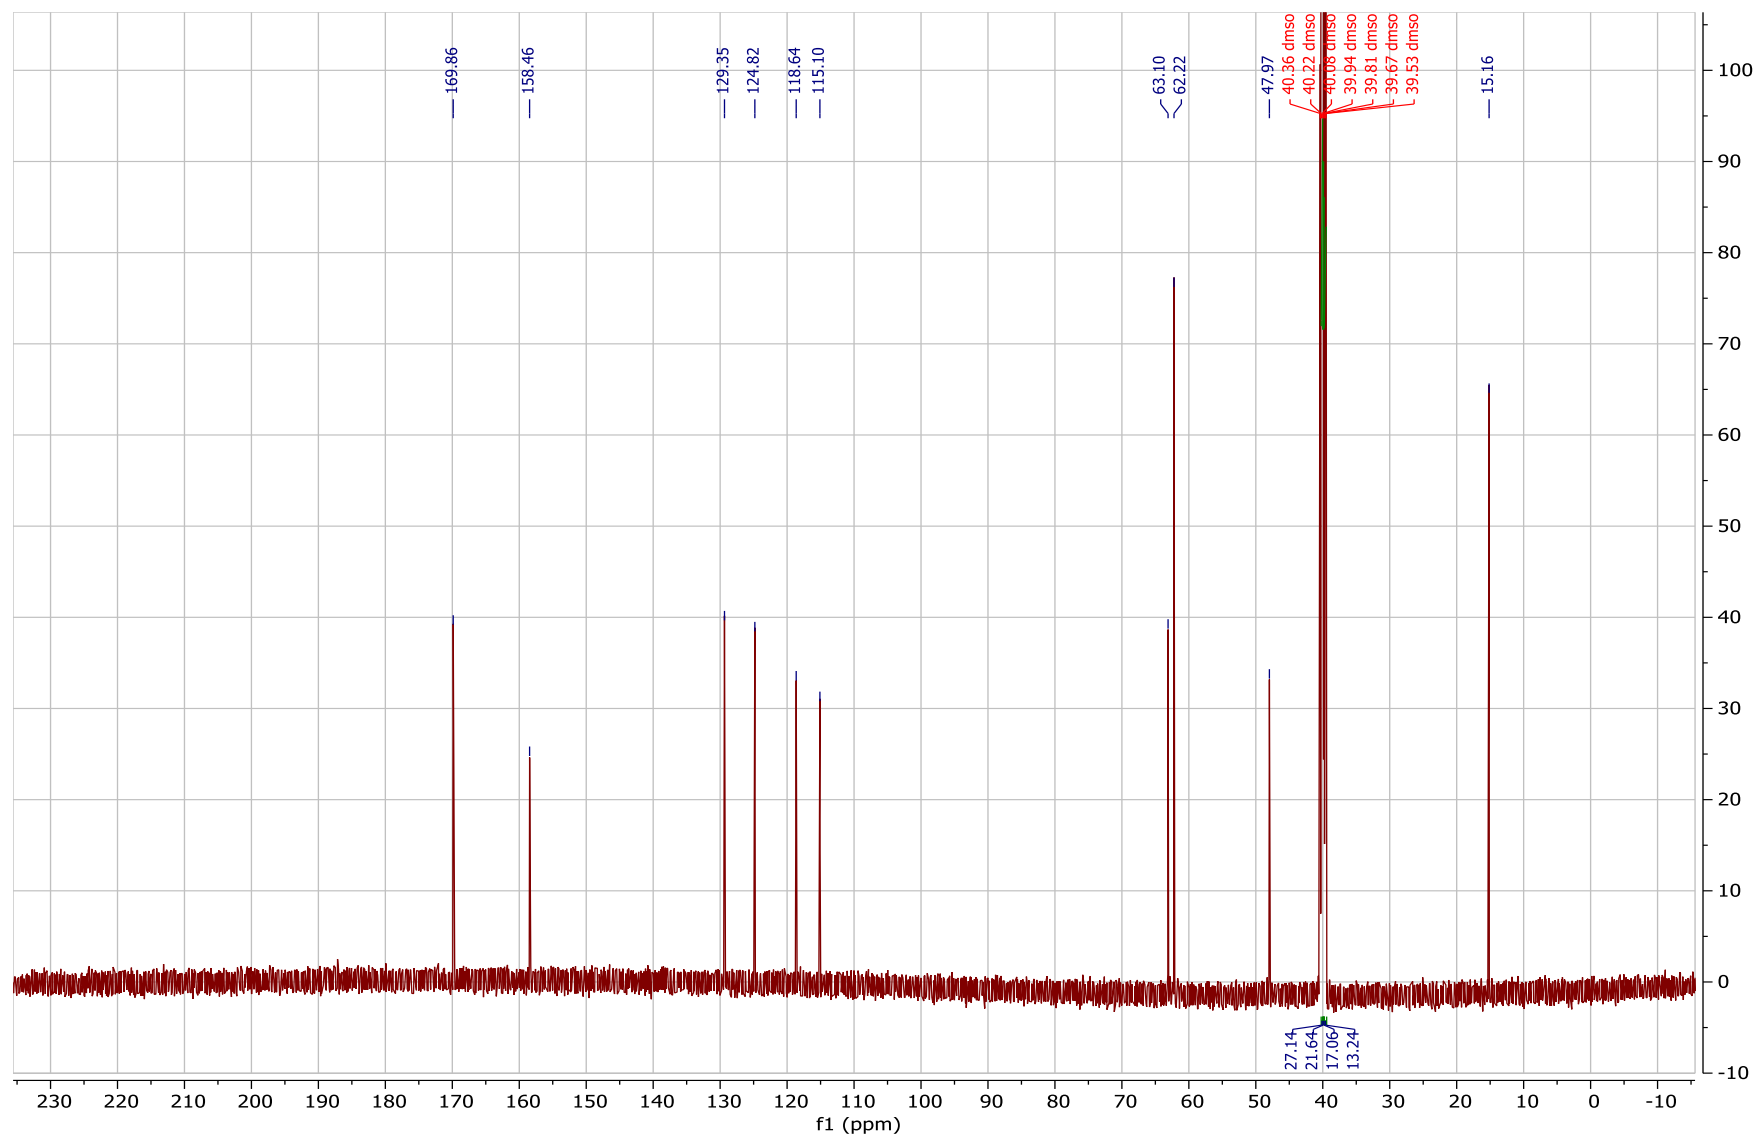

### Single Mass Analysis

Tolerance = 5.0 mDa / DBE: min = -1.5, max = 120.0

Element prediction: Off

Number of isotope peaks used for i-FIT = 3

Monoisotopic Mass, Even Electron Ions

32 formula(e) evaluated with 1 results within limits (up to 20 best isotopic matches for each mass)

Elements Used:

| Mass     | Calc. Mass | mDa | PPM | DBE | Formula          | i-FIT | i-FIT Norm | Fit Conf % | C  | H  | 11B | N | O |
|----------|------------|-----|-----|-----|------------------|-------|------------|------------|----|----|-----|---|---|
| 278.1200 | 278.1200   | 0.0 | 0.0 | 6.5 | C13 H17 11B N O5 | 167.5 | n/a        | n/a        | 13 | 17 | 1   | 1 | 5 |

INTER039

29Sep2021\_IG28 109 (1.105) Cm (109:112)

1: TOF MS ES+  
1.28e+005

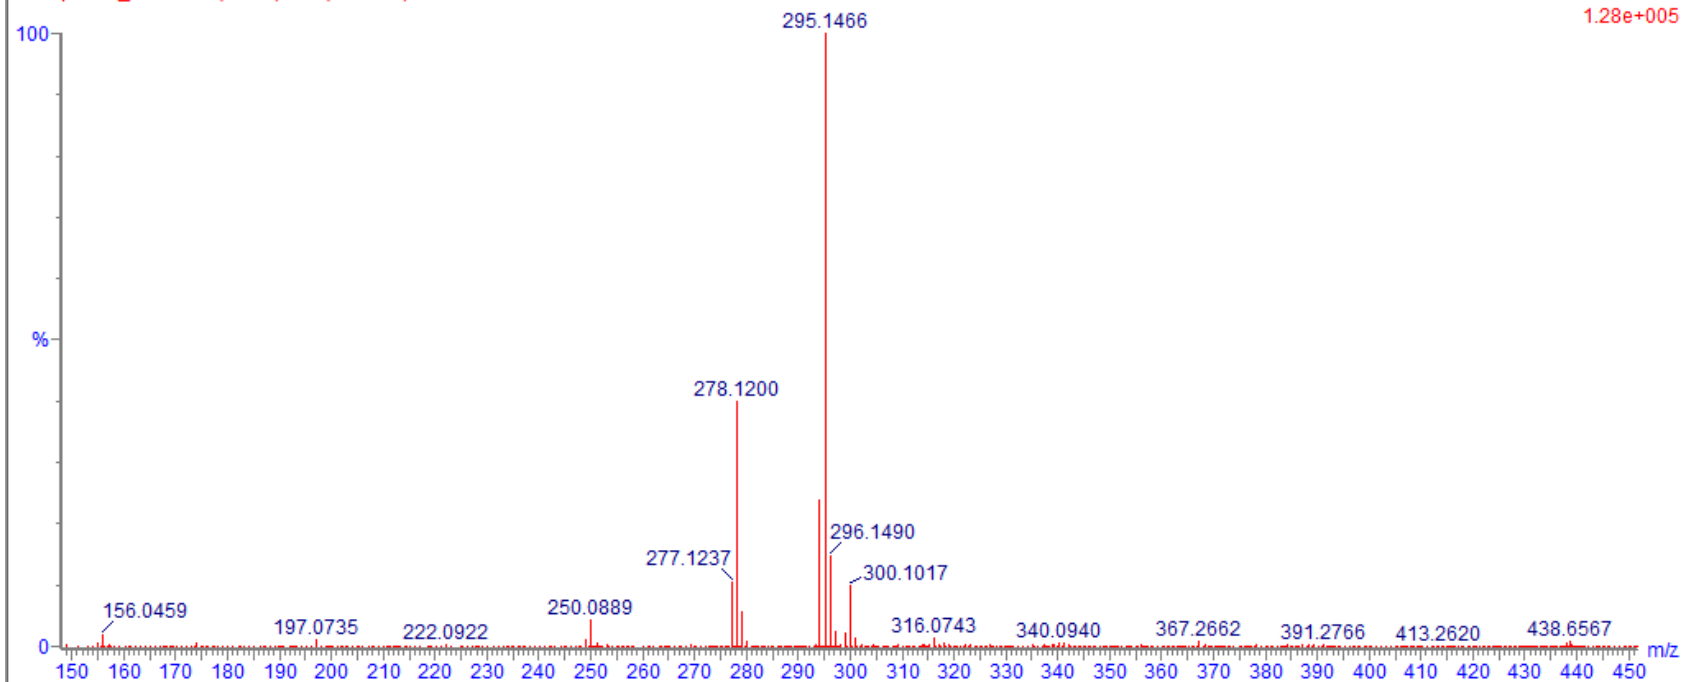

INTER039

29Sep2021\_IG28

1: TOF MS ES+  
295.147 0.0500Da  
7.03e4

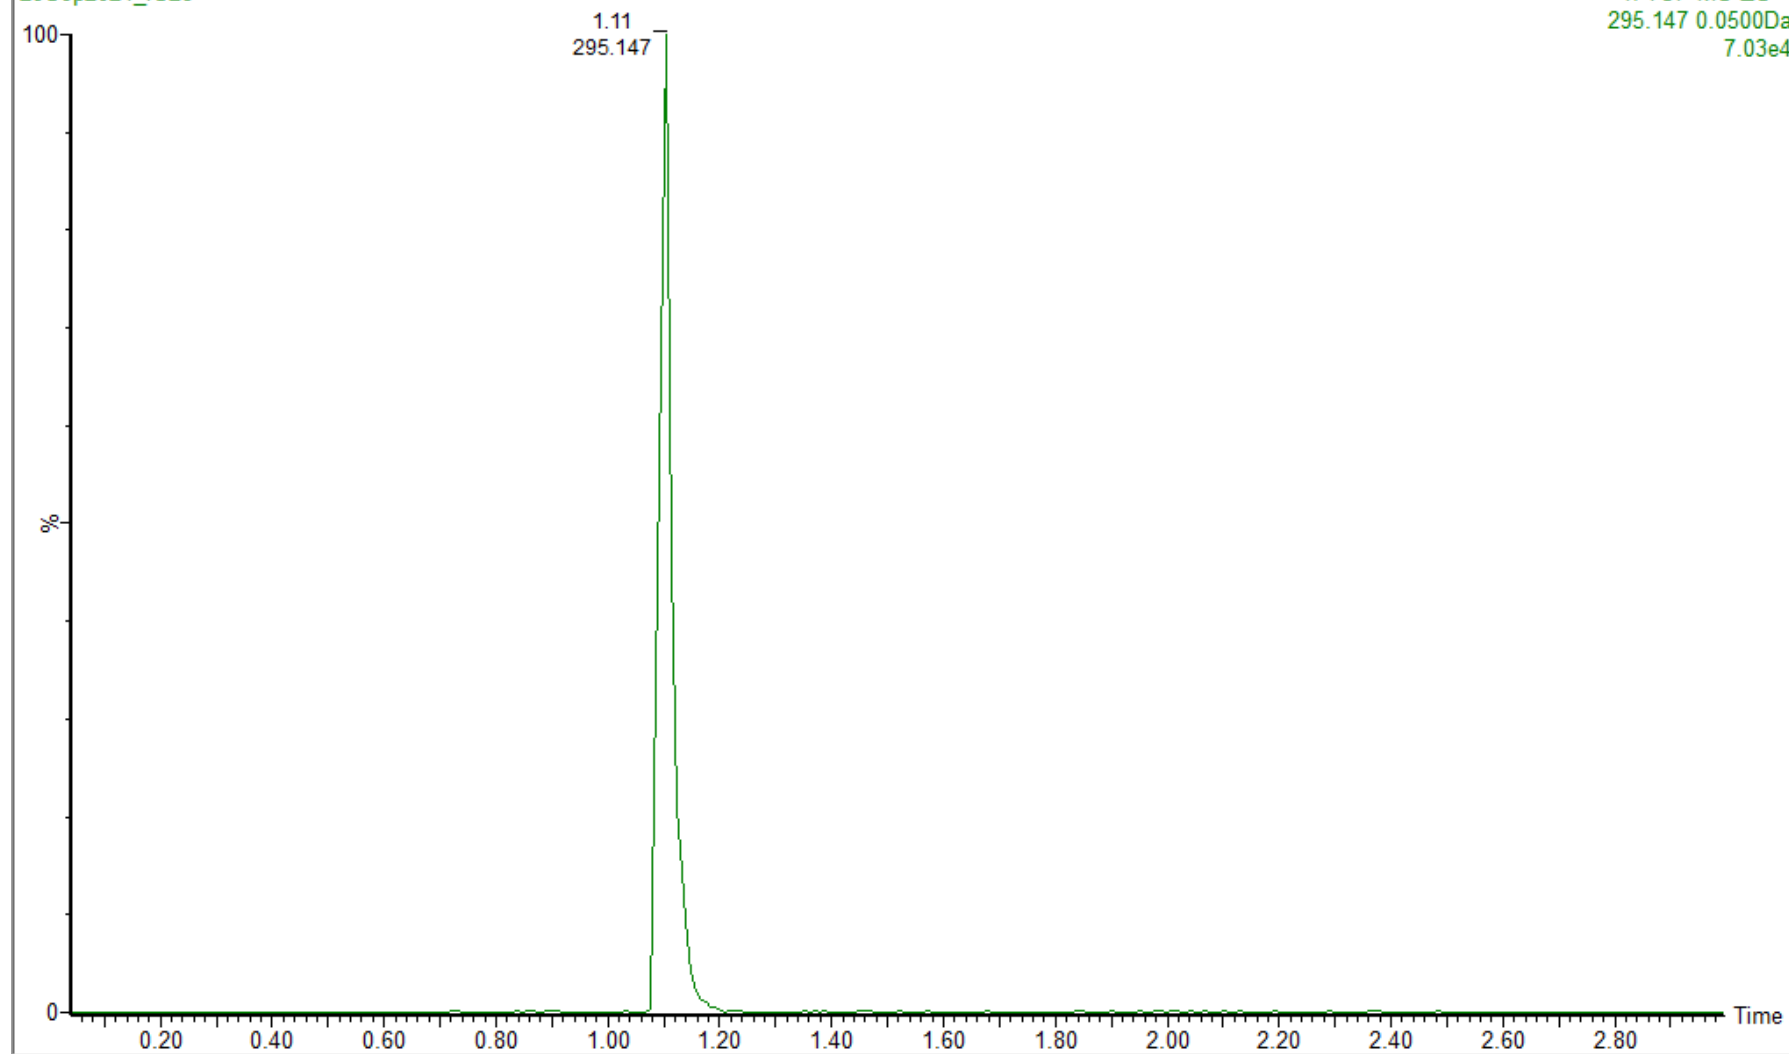

**Methyl 4-(6-methyl-4,8-dioxo-1,3,6,2-dioxazaborocan-2-yl)benzoate**

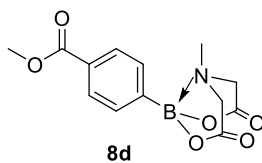

methyl 4-(6-methyl-4,8-dioxo-1,3,6,2-dioxazaborocan-2-yl)benzoate

Chemical Formula:  $C_{13}H_{14}BNO_6$

Molecular Weight: 291.0644

Yield = 221.1 mg (76%)



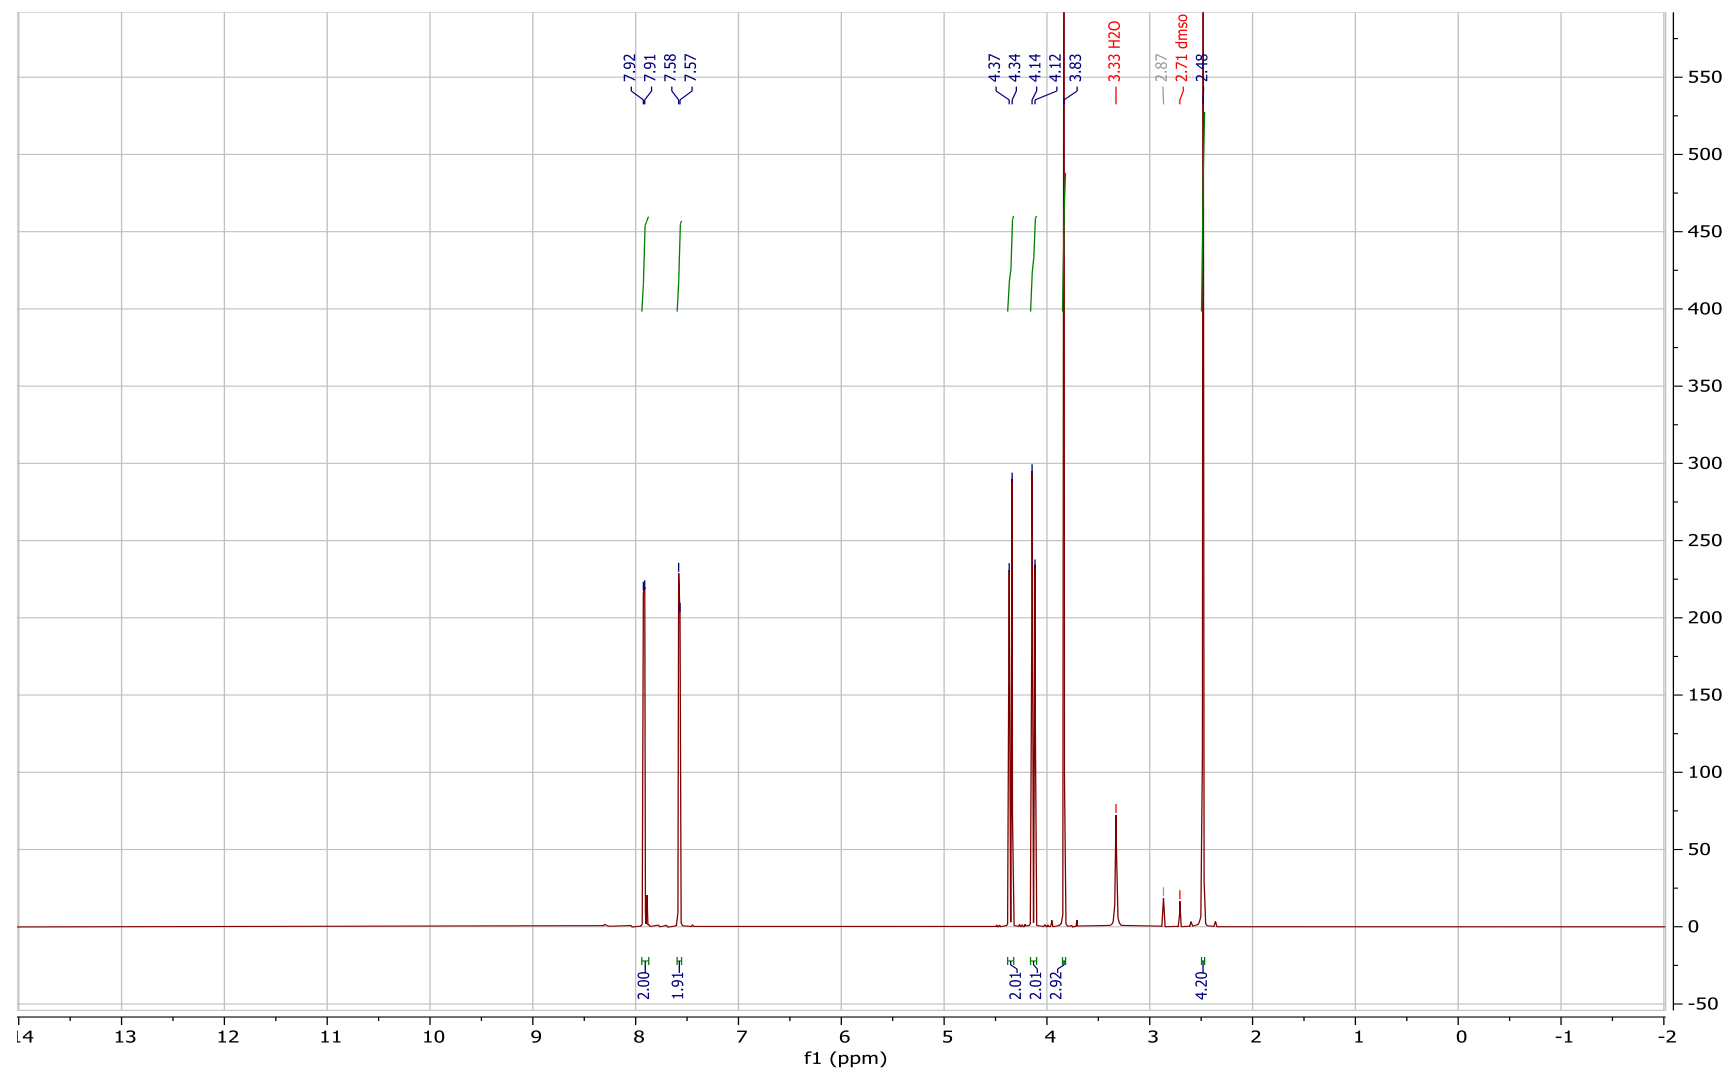

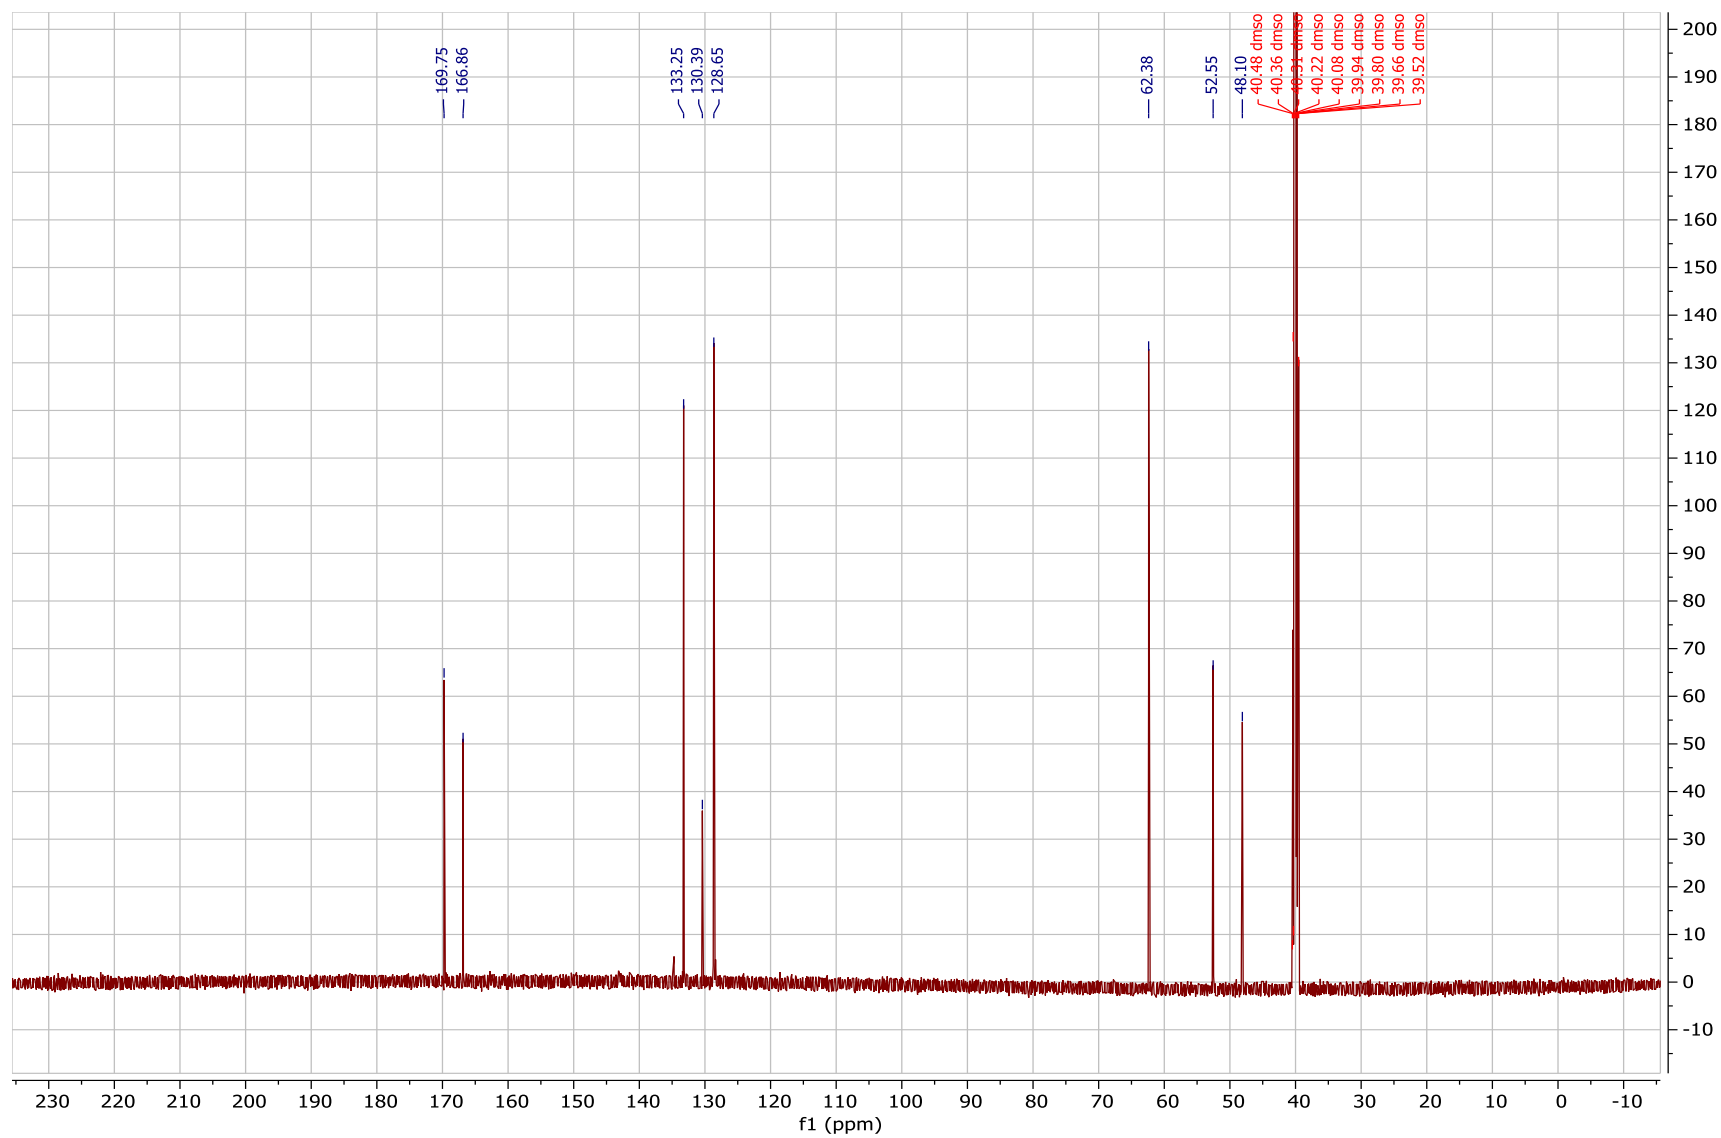

### Single Mass Analysis

Tolerance = 5.0 mDa / DBE: min = -1.5, max = 120.0

Element prediction: Off

Number of isotope peaks used for i-FIT = 3

Monoisotopic Mass, Even Electron Ions

39 formula(e) evaluated with 1 results within limits (up to 20 best isotopic matches for each mass)

Elements Used:

| Mass     | Calc. Mass | mDa | PPM | DBE | Formula           | i-FIT | i-FIT Norm | Fit Conf % | C  | H  | 11B | N | O |
|----------|------------|-----|-----|-----|-------------------|-------|------------|------------|----|----|-----|---|---|
| 309.1262 | 309.1258   | 0.4 | 1.3 | 6.5 | C13 H18 11B N2 O6 | 171.5 | n/a        | n/a        | 13 | 18 | 1   | 2 | 6 |

INTER044

29Sep2021\_IG34 102 (1.024) Cm (101:104)

1: TOF MS ES+  
8.90e+004

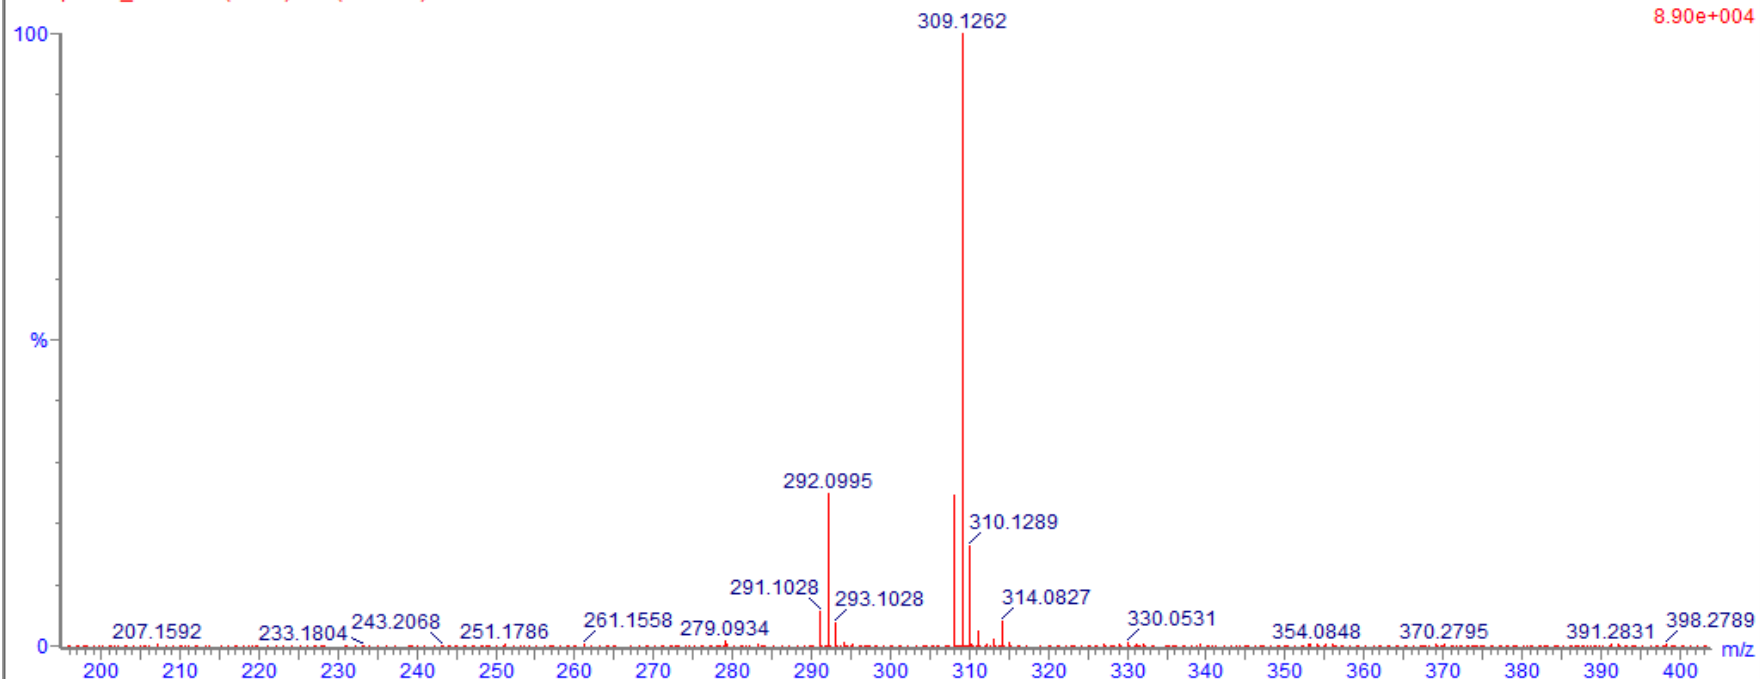

INTER044

29Sep2021\_IG34

1: TOF MS ES+  
309.126 0.0500Da  
3.58e4

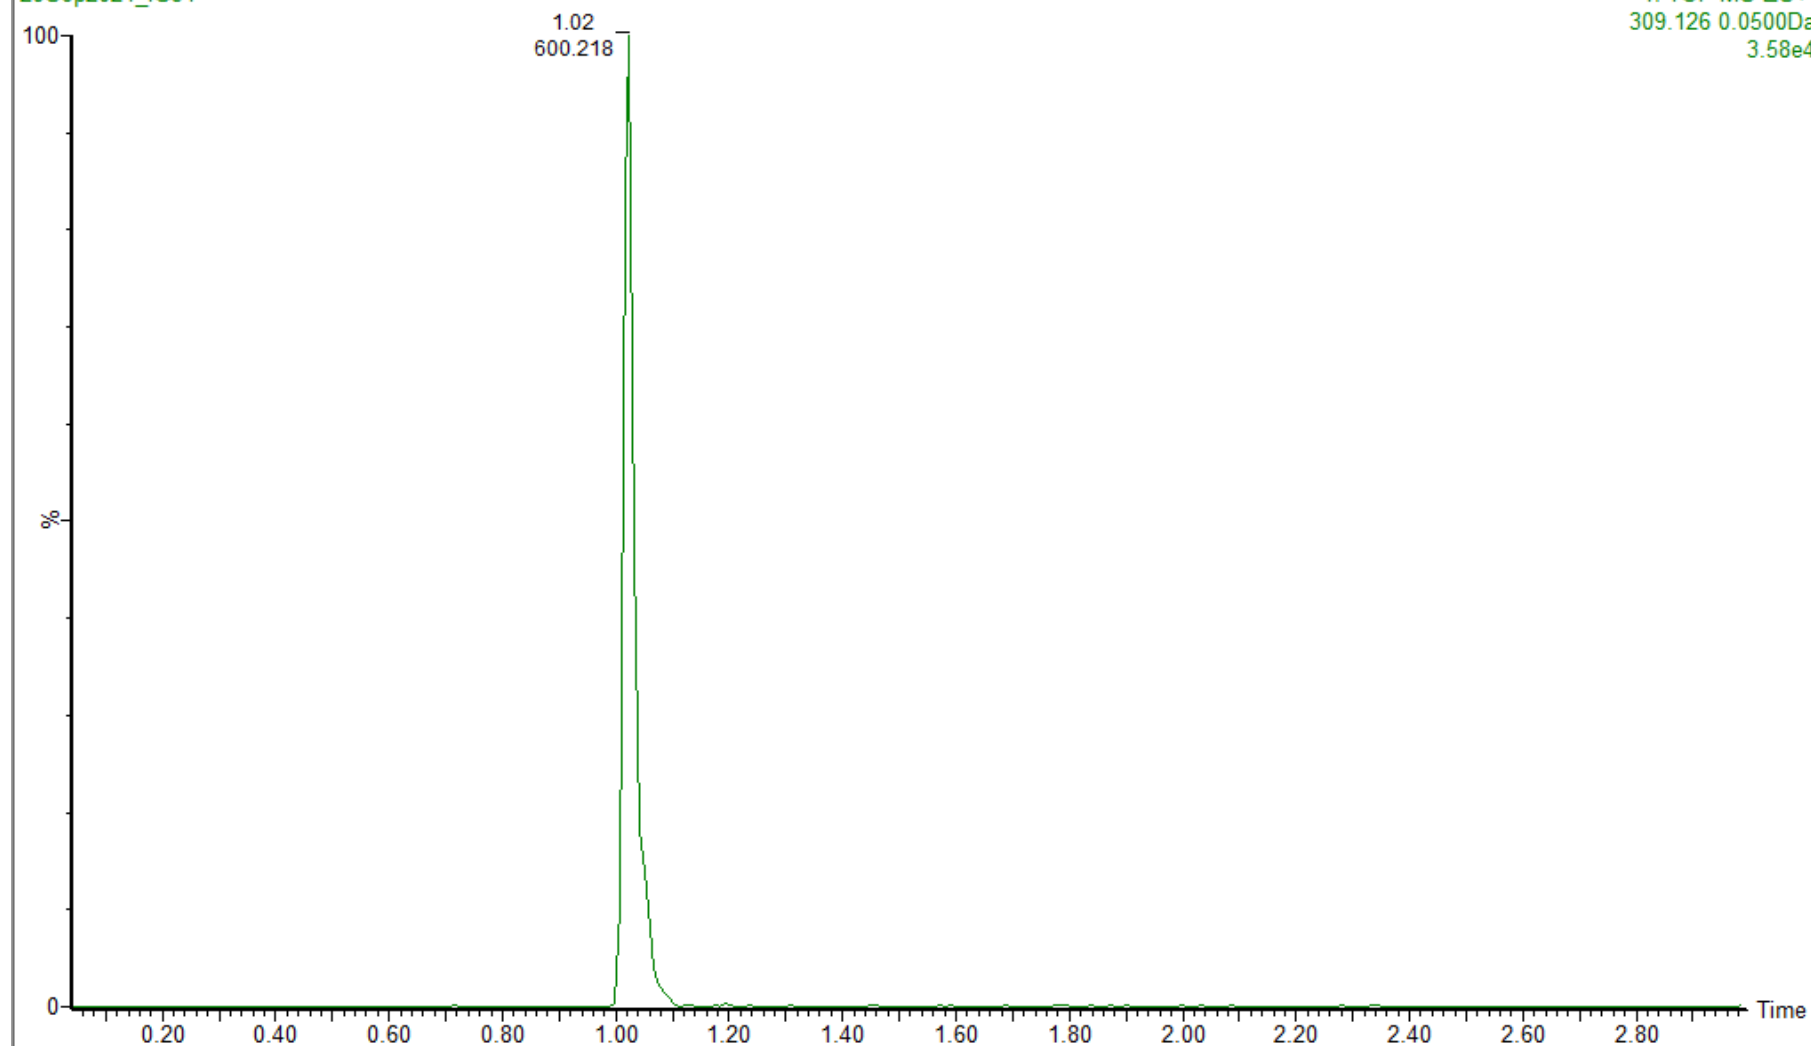

**6-Methyl-2-(2-(trifluoromethyl)phenyl)-1,3,6,2-dioxazaborocane-4,8-dione 8e**

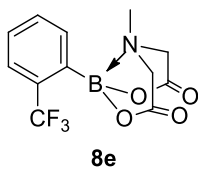

6-methyl-2-(2-(trifluoromethyl)phenyl)-1,3,6,2-dioxazaborocane-4,8-dione

Chemical Formula:  $C_{12}H_{11}BF_3NO_4$

Molecular Weight: 301.0262

Yield = 114.3 mg (38%).

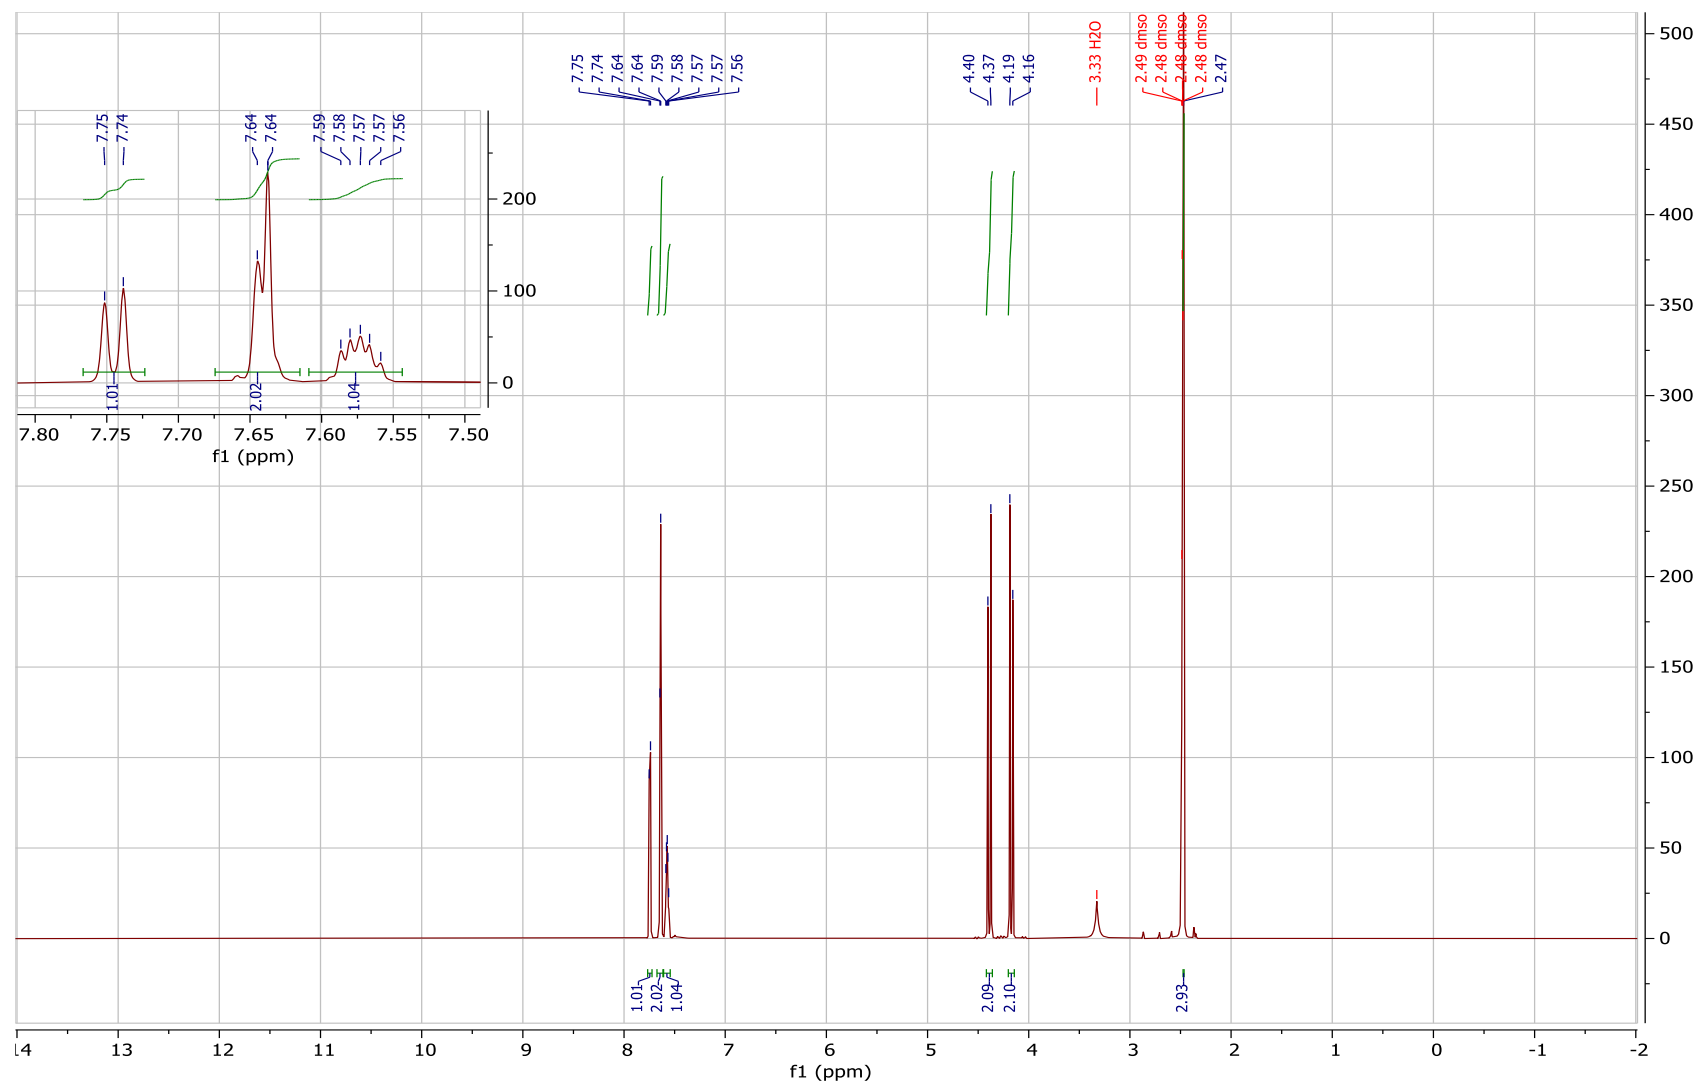

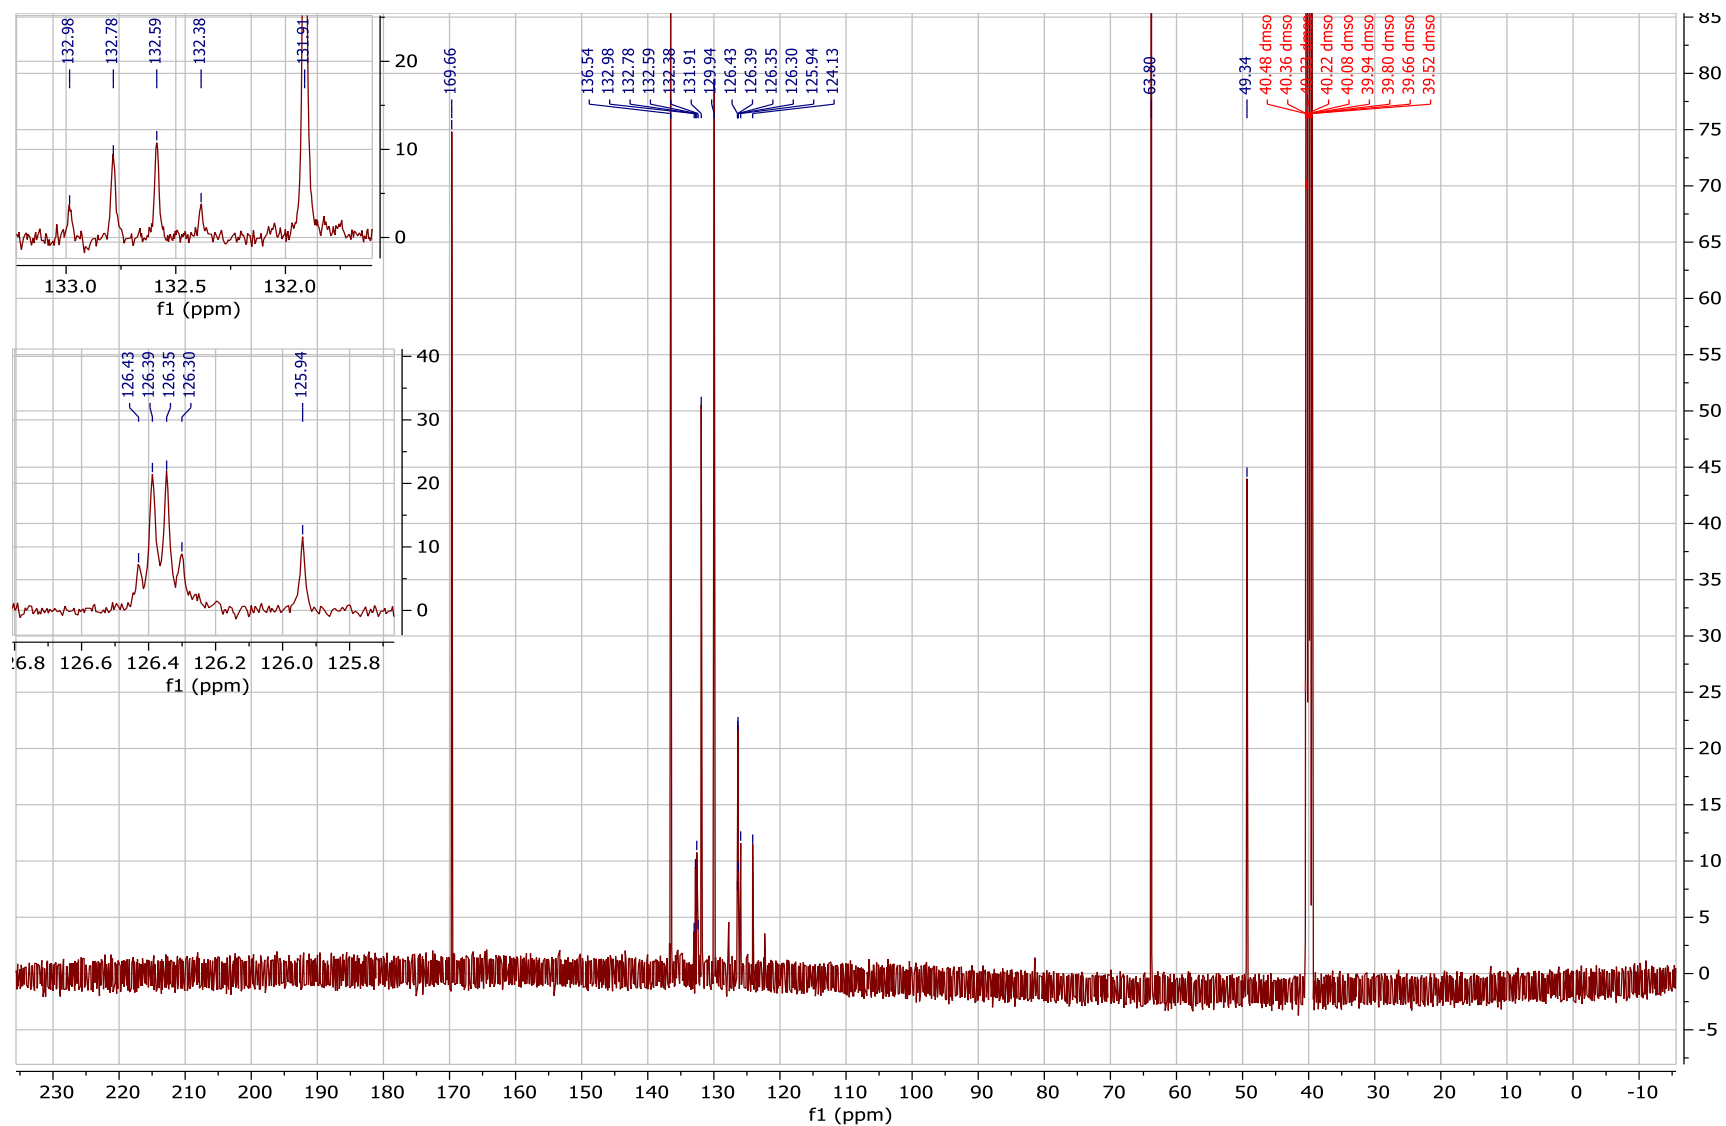

### Single Mass Analysis

Tolerance = 5.0 mDa / DBE: min = -1.5, max = 120.0

Element prediction: Off

Number of isotope peaks used for i-FIT = 3

Monoisotopic Mass, Even Electron Ions

111 formula(e) evaluated with 1 results within limits (up to 20 best isotopic matches for each mass)

Elements Used:

| Mass     | Calc. Mass | mDa | PPM | DBE | Formula             | i-FIT | i-FIT Norm | Fit Conf % | C  | H  | 11B | N | O | F |
|----------|------------|-----|-----|-----|---------------------|-------|------------|------------|----|----|-----|---|---|---|
| 302.0811 | 302.0811   | 0.0 | 0.0 | 6.5 | C12 H12 11B N O4 F3 | 248.6 | n/a        | n/a        | 12 | 12 | 1   | 1 | 4 | 3 |

INTER046

29Sep2021\_IG36 110 (1.114) Cm (110:113)

1: TOF MS ES+  
8.66e+005

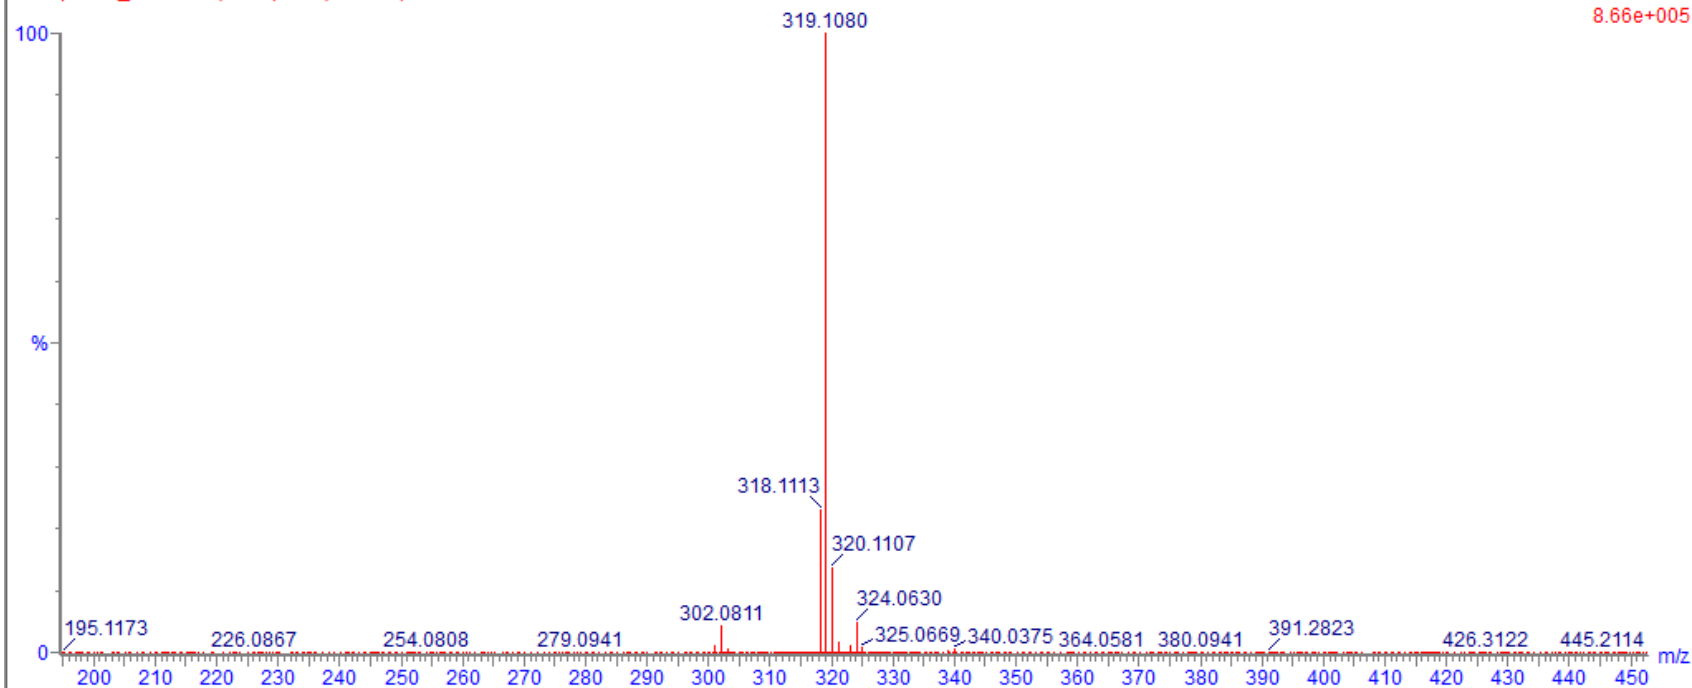



INTER046

29Sep2021\_IG36

1: TOF MS ES+  
319.108 0.0500Da  
4.05e5

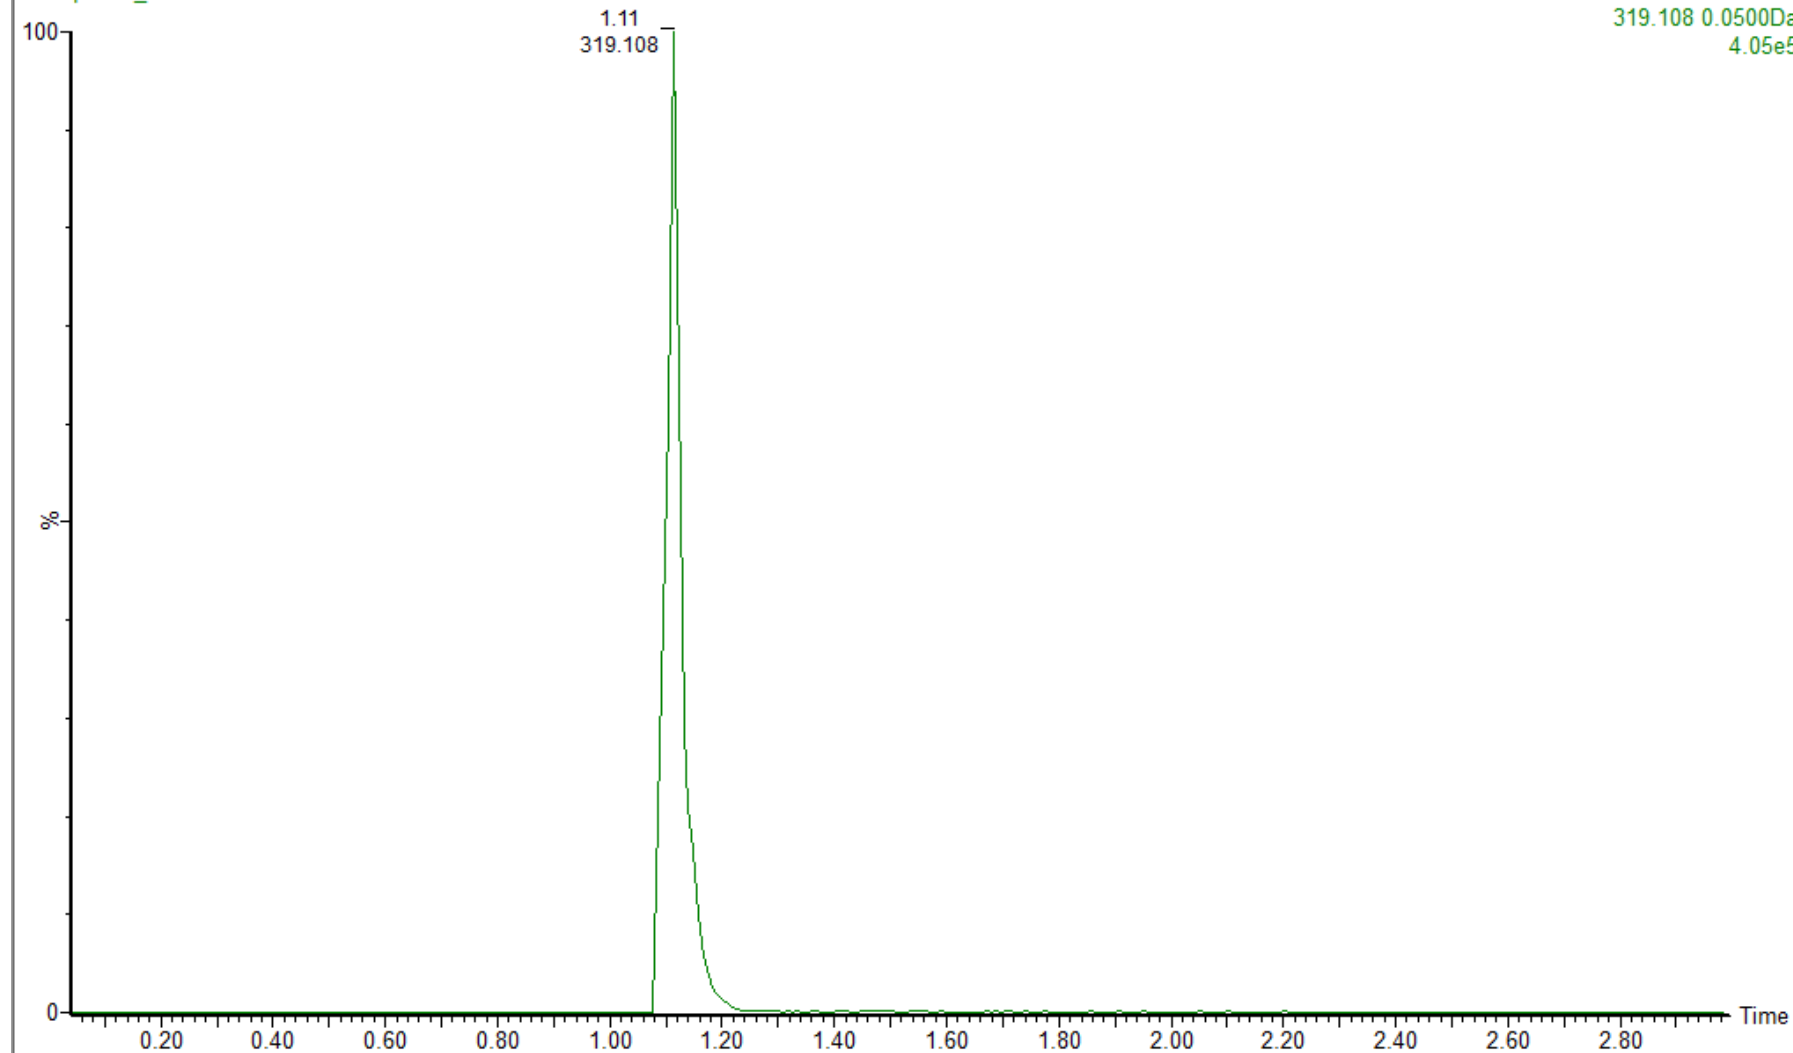

**2-Fluoro-4-(6-methyl-4,8-dioxo-1,3,6,2-dioxazaborocan-2-yl)benzonitrile 8f**

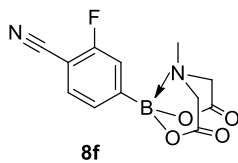

2-fluoro-4-(6-methyl-4,8-dioxo-1,3,6,2-dioxazaborocan-2-yl)benzonitrile

Chemical Formula: C<sub>12</sub>H<sub>10</sub>BFN<sub>2</sub>O<sub>4</sub>

Molecular Weight: 276.0282

Yield = 198.0 mg (72%).

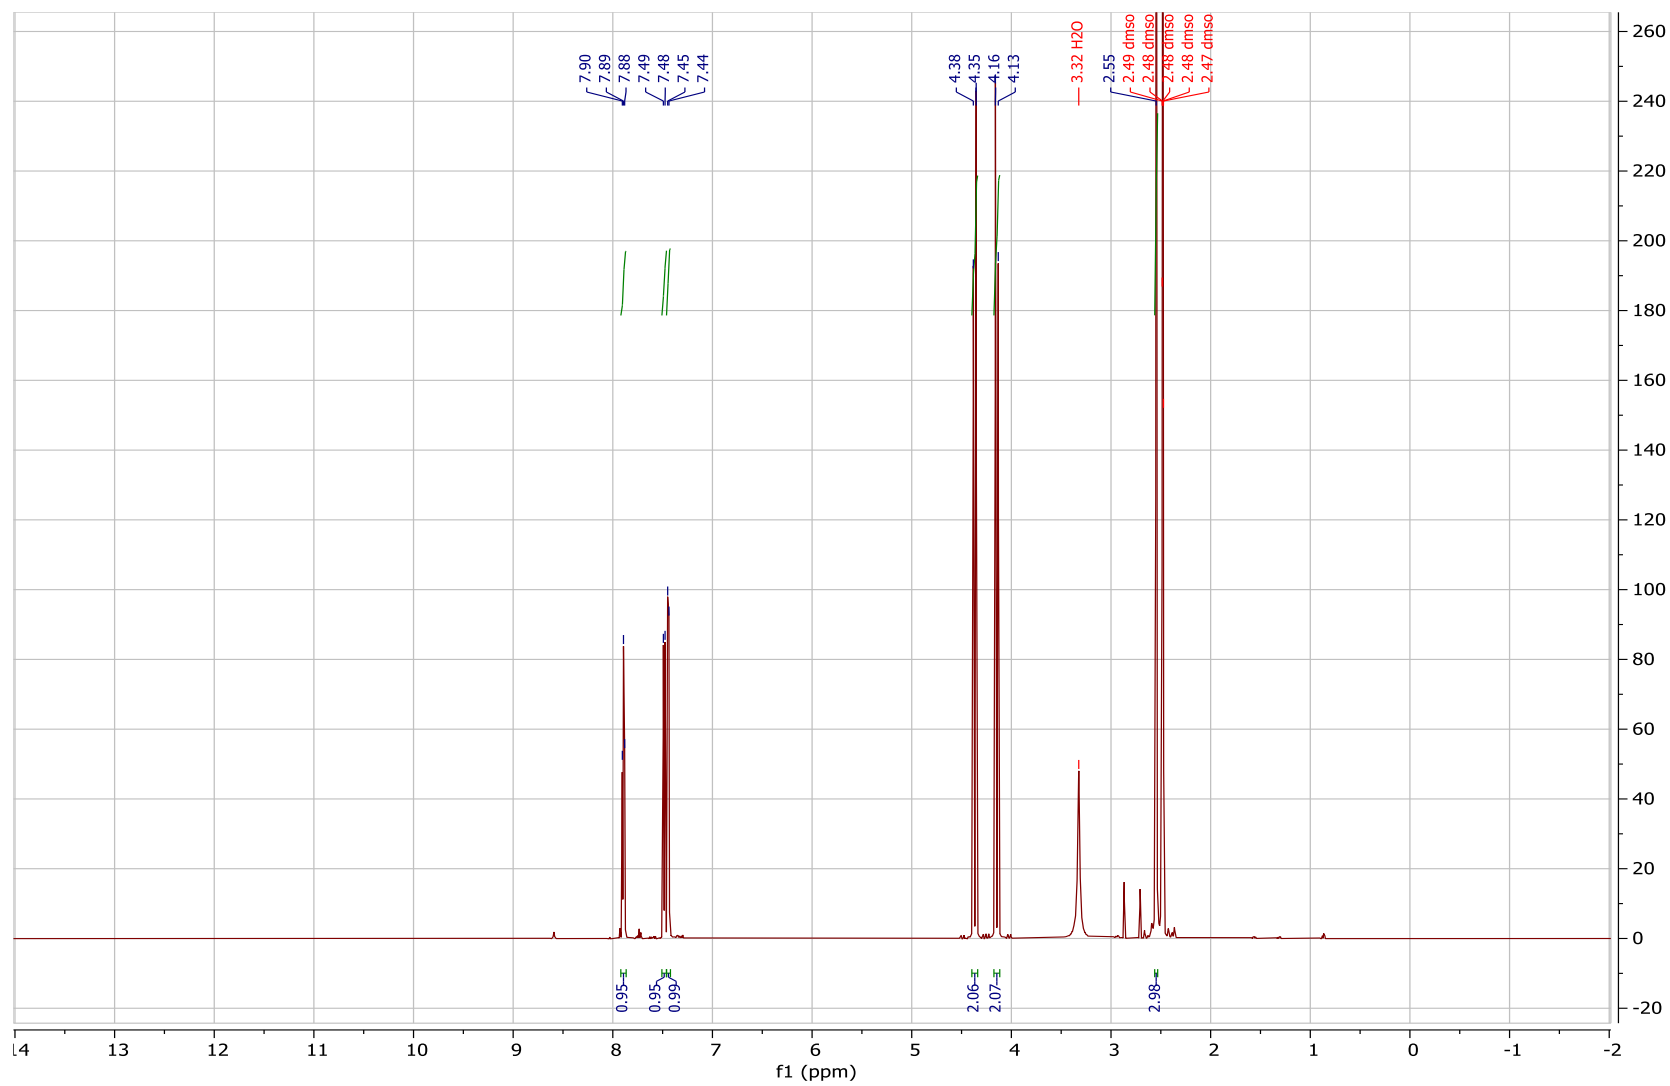

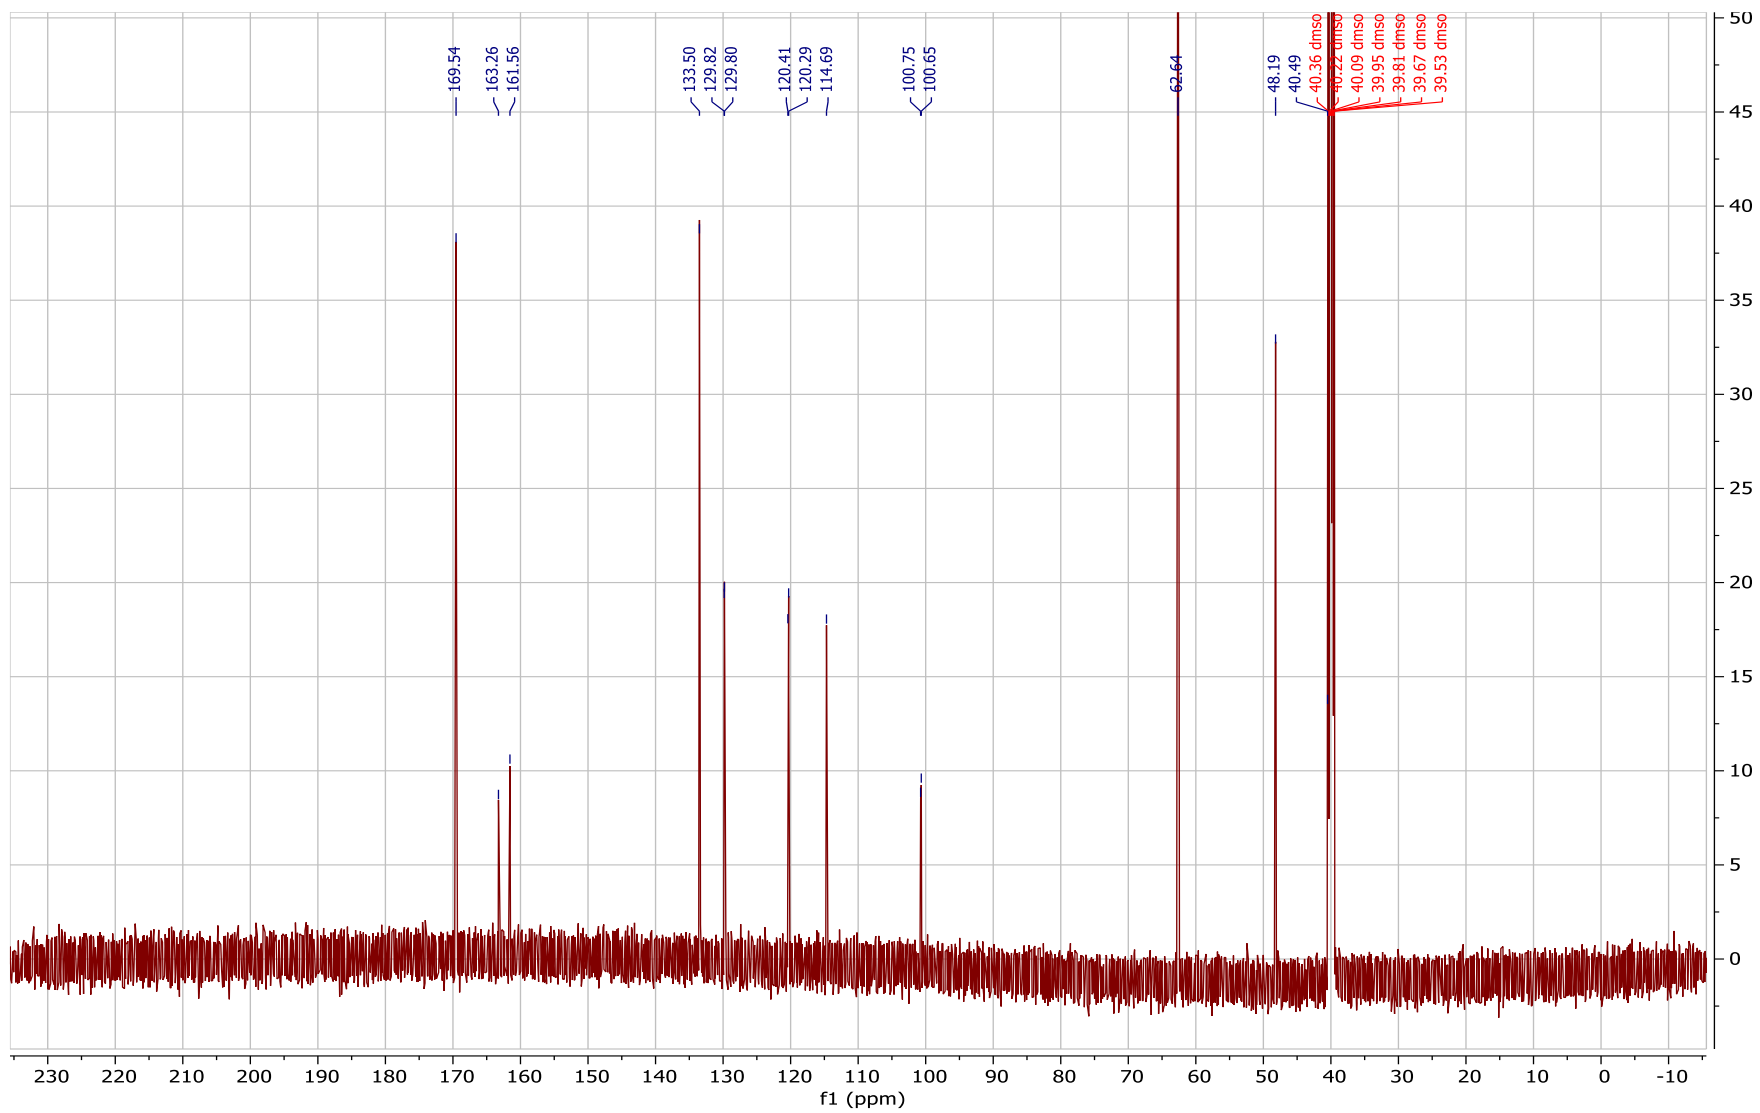

### Single Mass Analysis

Tolerance = 5.0 mDa / DBE: min = -1.5, max = 120.0

Element prediction: Off

Number of isotope peaks used for i-FIT = 3

Monoisotopic Mass, Even Electron Ions

76 formula(e) evaluated with 1 results within limits (up to 20 best isotopic matches for each mass)

Elements Used:

| Mass     | Calc. Mass | mDa | PPM | DBE | Formula             | i-FIT | i-FIT Norm | Fit Conf % | C  | H  | 11B | N | O | F |
|----------|------------|-----|-----|-----|---------------------|-------|------------|------------|----|----|-----|---|---|---|
| 294.1063 | 294.1061   | 0.2 | 0.7 | 7.5 | C12 H14 11B N3 O4 F | 91.4  | n/a        | n/a        | 12 | 14 | 1   | 3 | 4 | 1 |

INTER047

29Sep2021\_JG38 104 (1.042) Cm (102:105)

1: TOF MS ES+  
1.68e+004

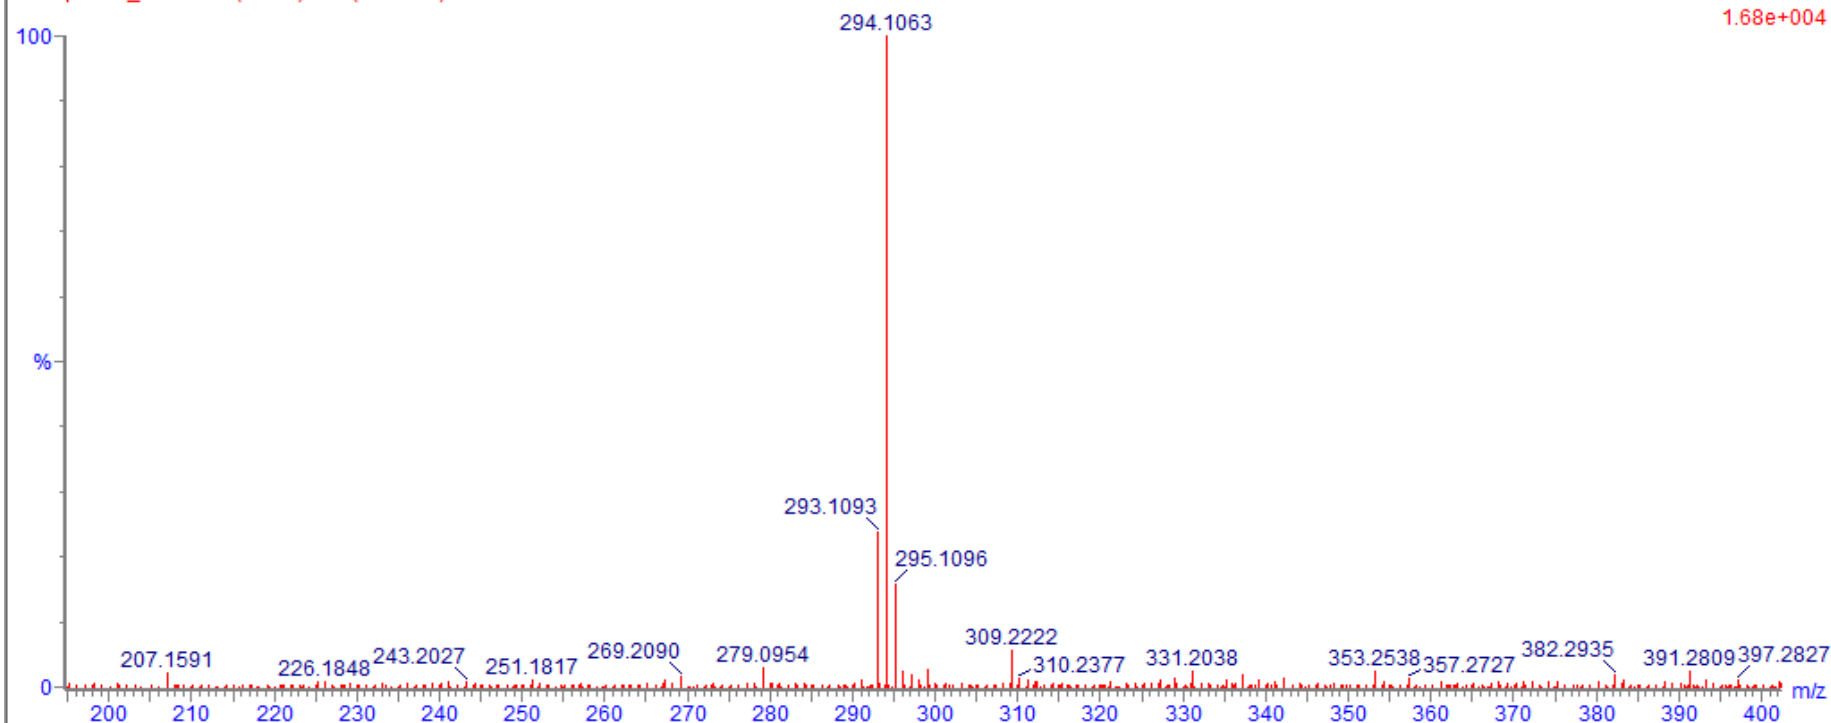

INTER047

29Sep2021\_IG38

1: TOF MS ES+  
294.106 0.0500Da  
7.53e3

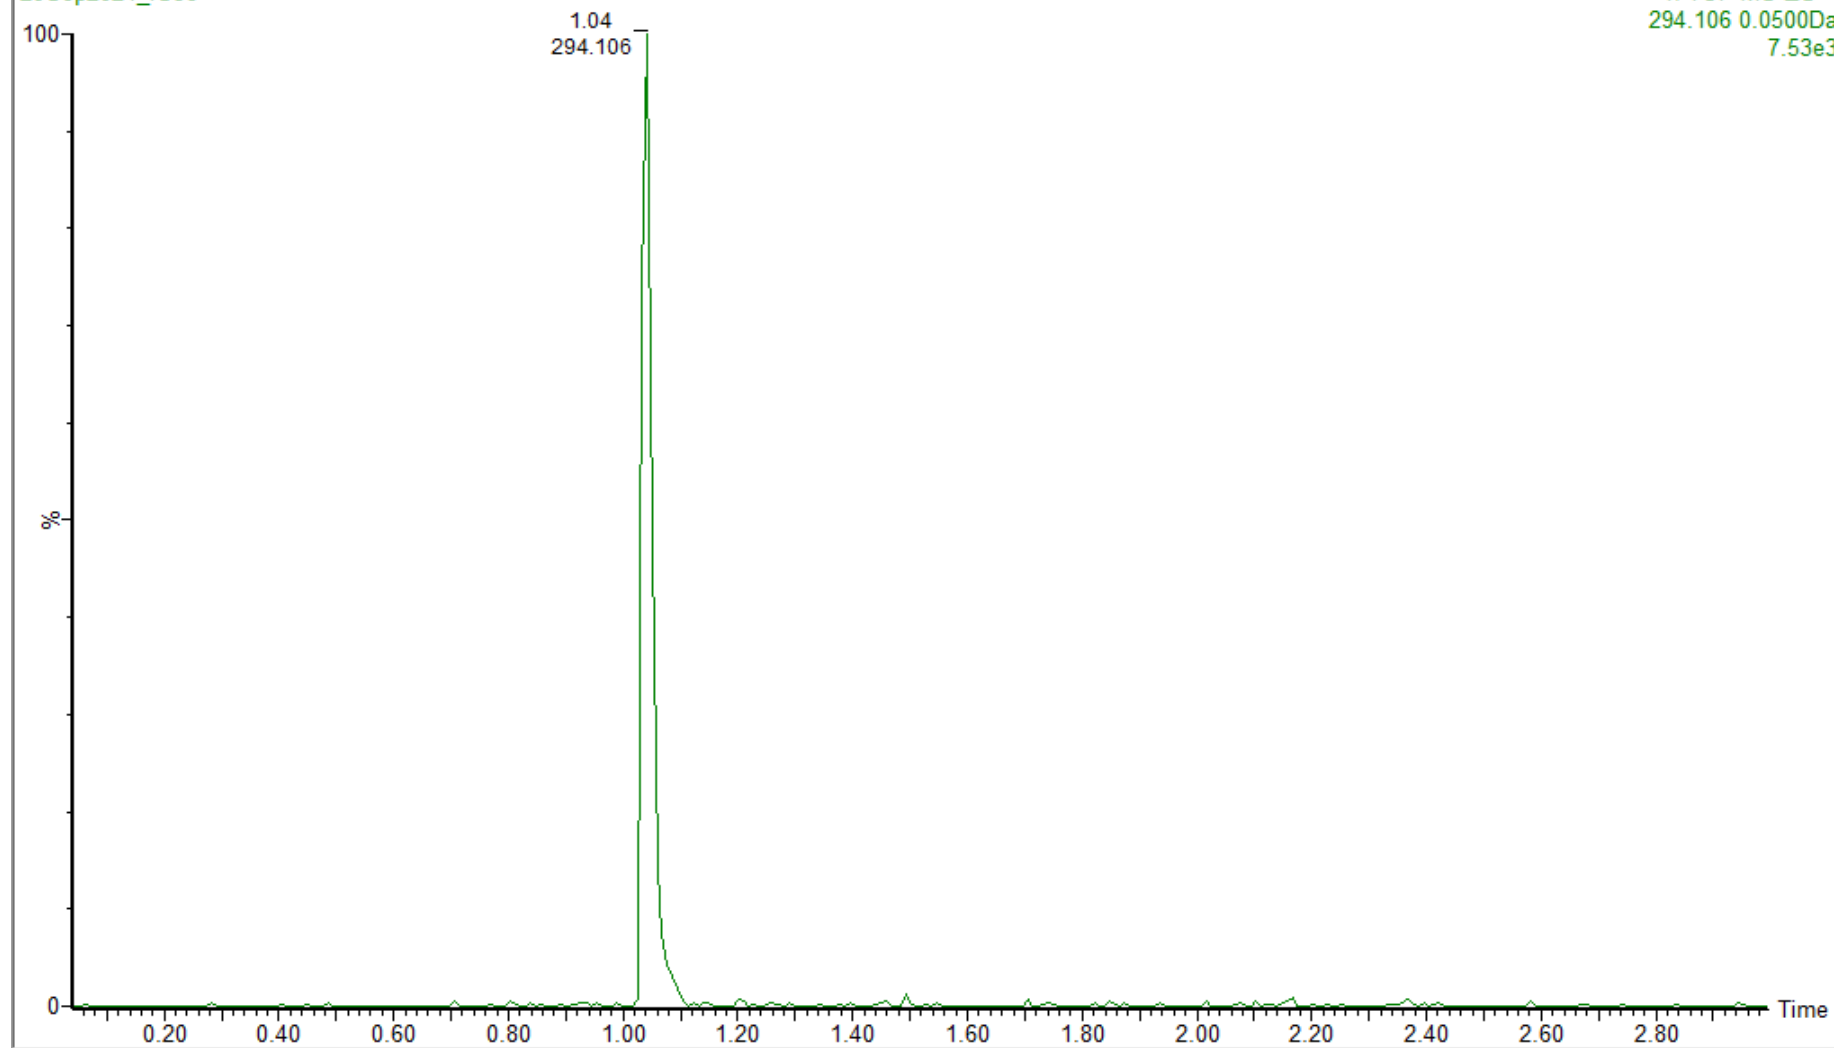



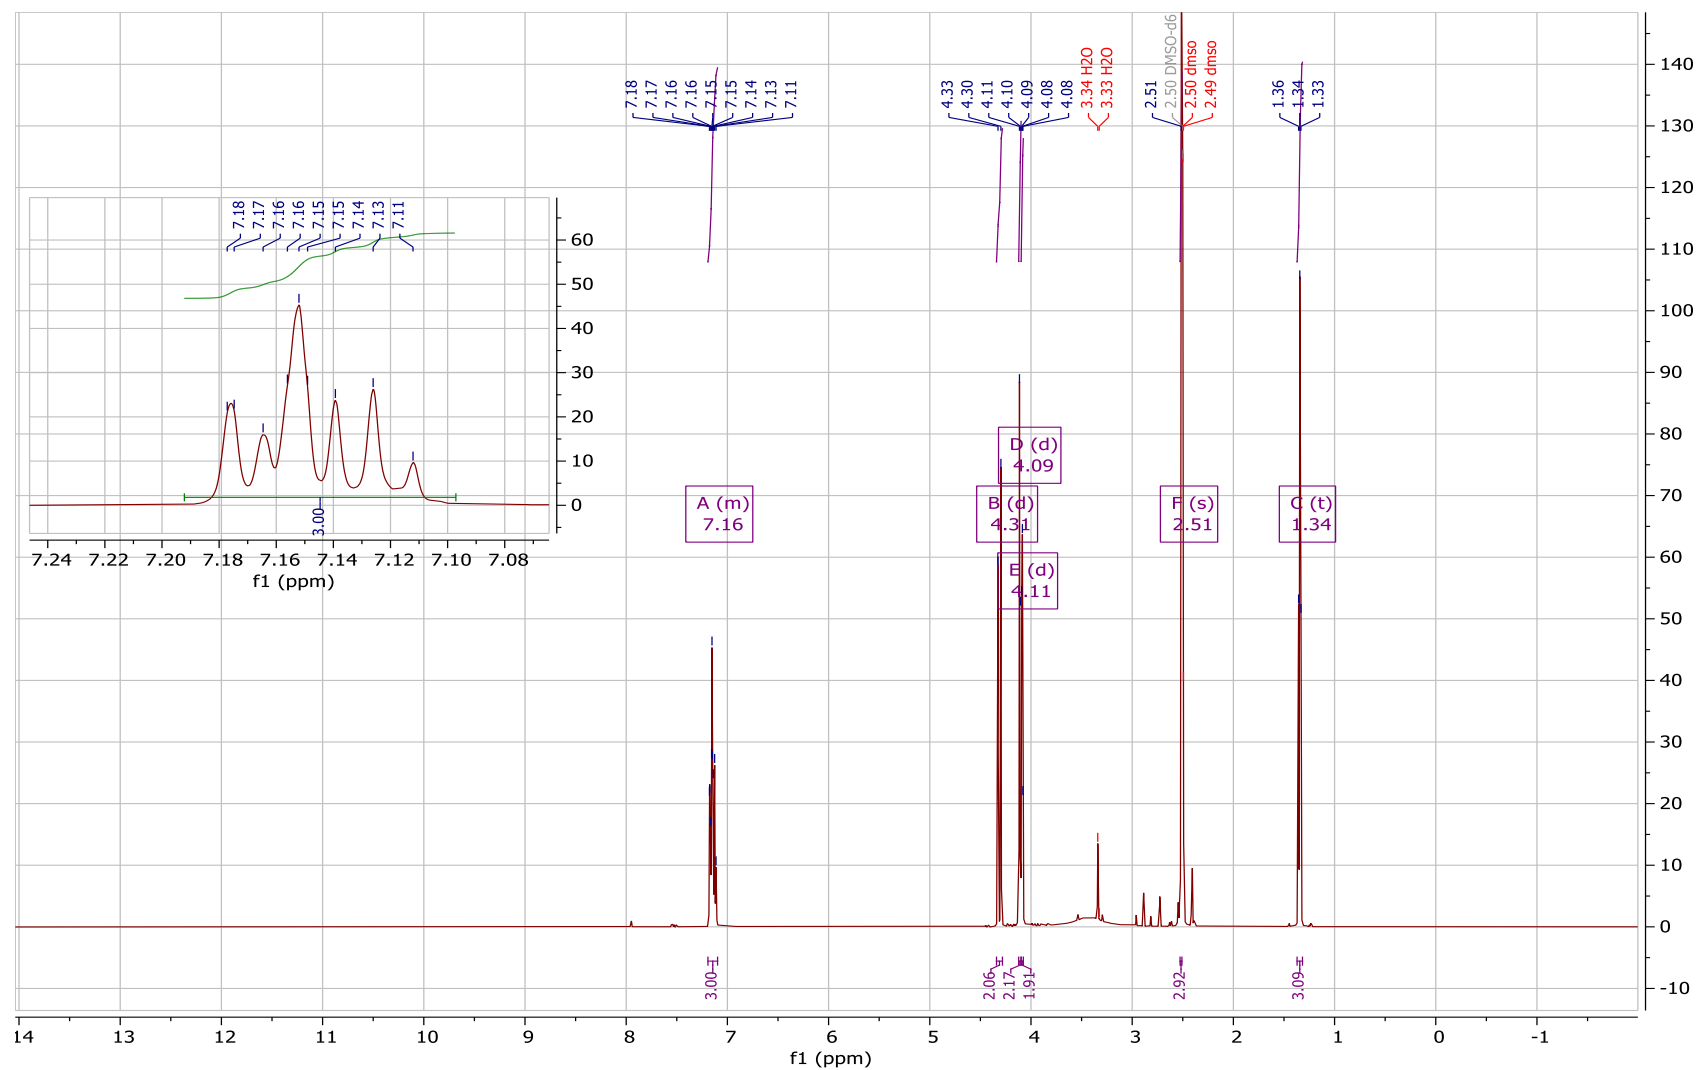



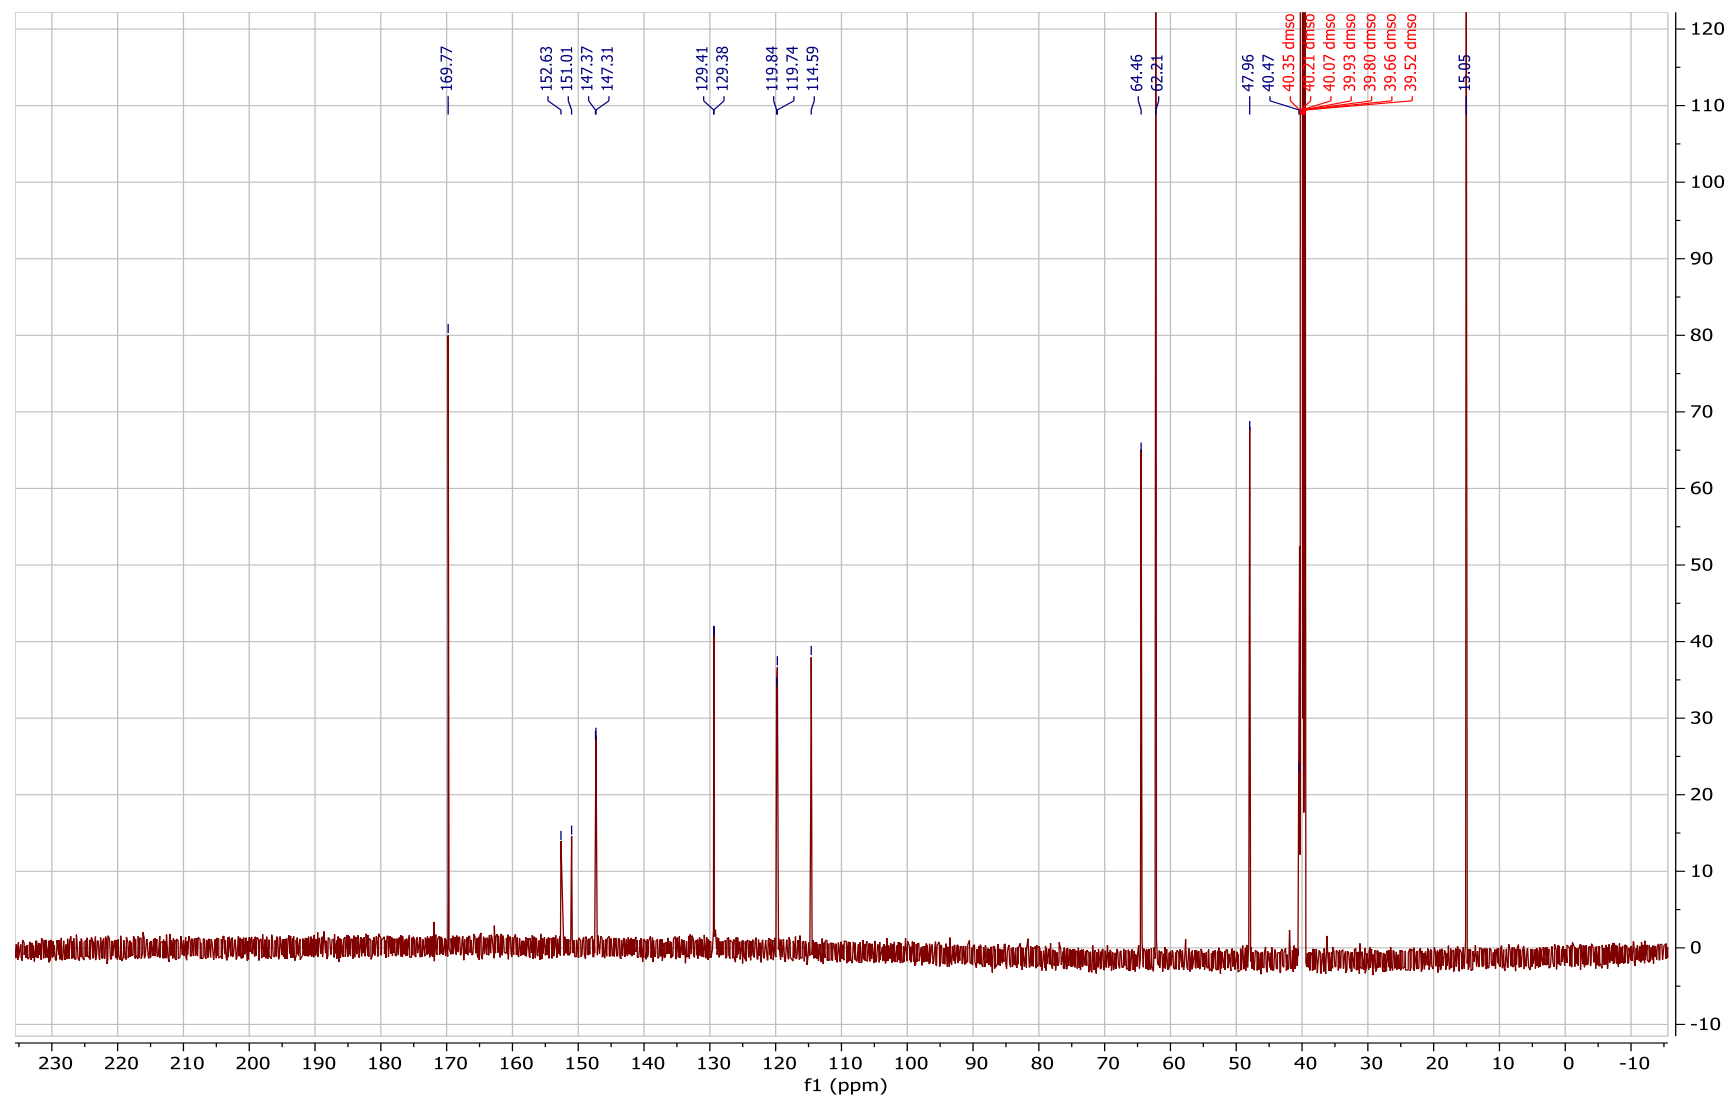

### Single Mass Analysis

Tolerance = 5.0 mDa / DBE: min = -1.5, max = 120.0

Element prediction: Off

Number of isotope peaks used for i-FIT = 3

Monoisotopic Mass, Even Electron Ions

64 formula(e) evaluated with 1 results within limits (up to 20 best isotopic matches for each mass)

Elements Used:

| Mass     | Calc. Mass | mDa | PPM | DBE | Formula            | i-FIT | i-FIT Norm | Fit Conf % | C  | H  | 11B | N | O | F |
|----------|------------|-----|-----|-----|--------------------|-------|------------|------------|----|----|-----|---|---|---|
| 296.1112 | 296.1106   | 0.6 | 2.0 | 6.5 | C13 H16 11B N O5 F | 168.0 | n/a        | n/a        | 13 | 16 | 1   | 1 | 5 | 1 |

INTER048

29Sep2021\_IG40 110 (1.114) Cm (109:114)

1: TOF MS ES+  
1.38e+005

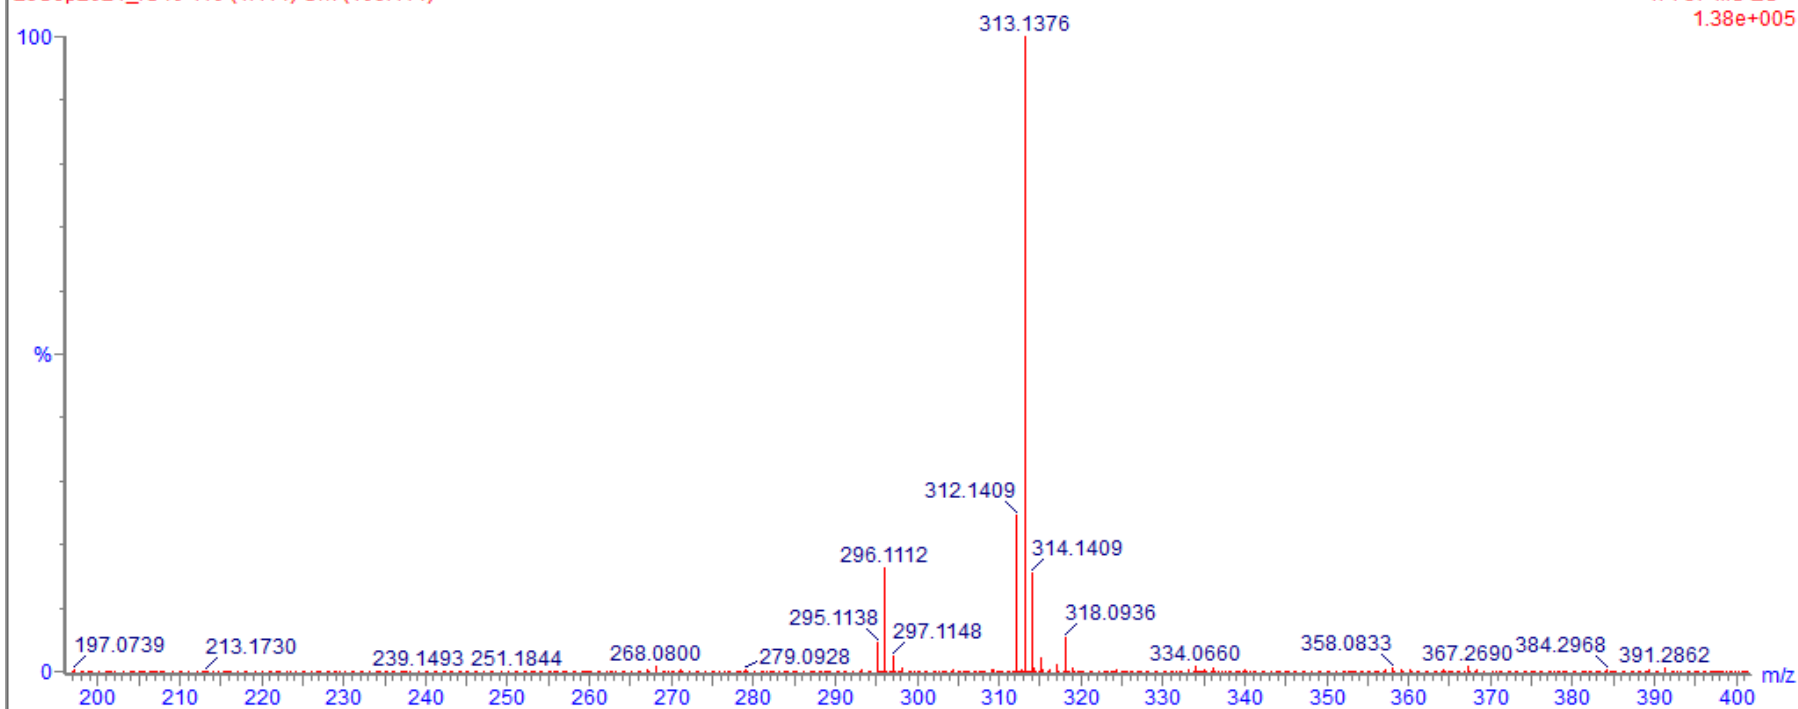

INTER048

29Sep2021\_IG40

1: TOF MS ES+  
313.138 0.0500Da  
4.30e4

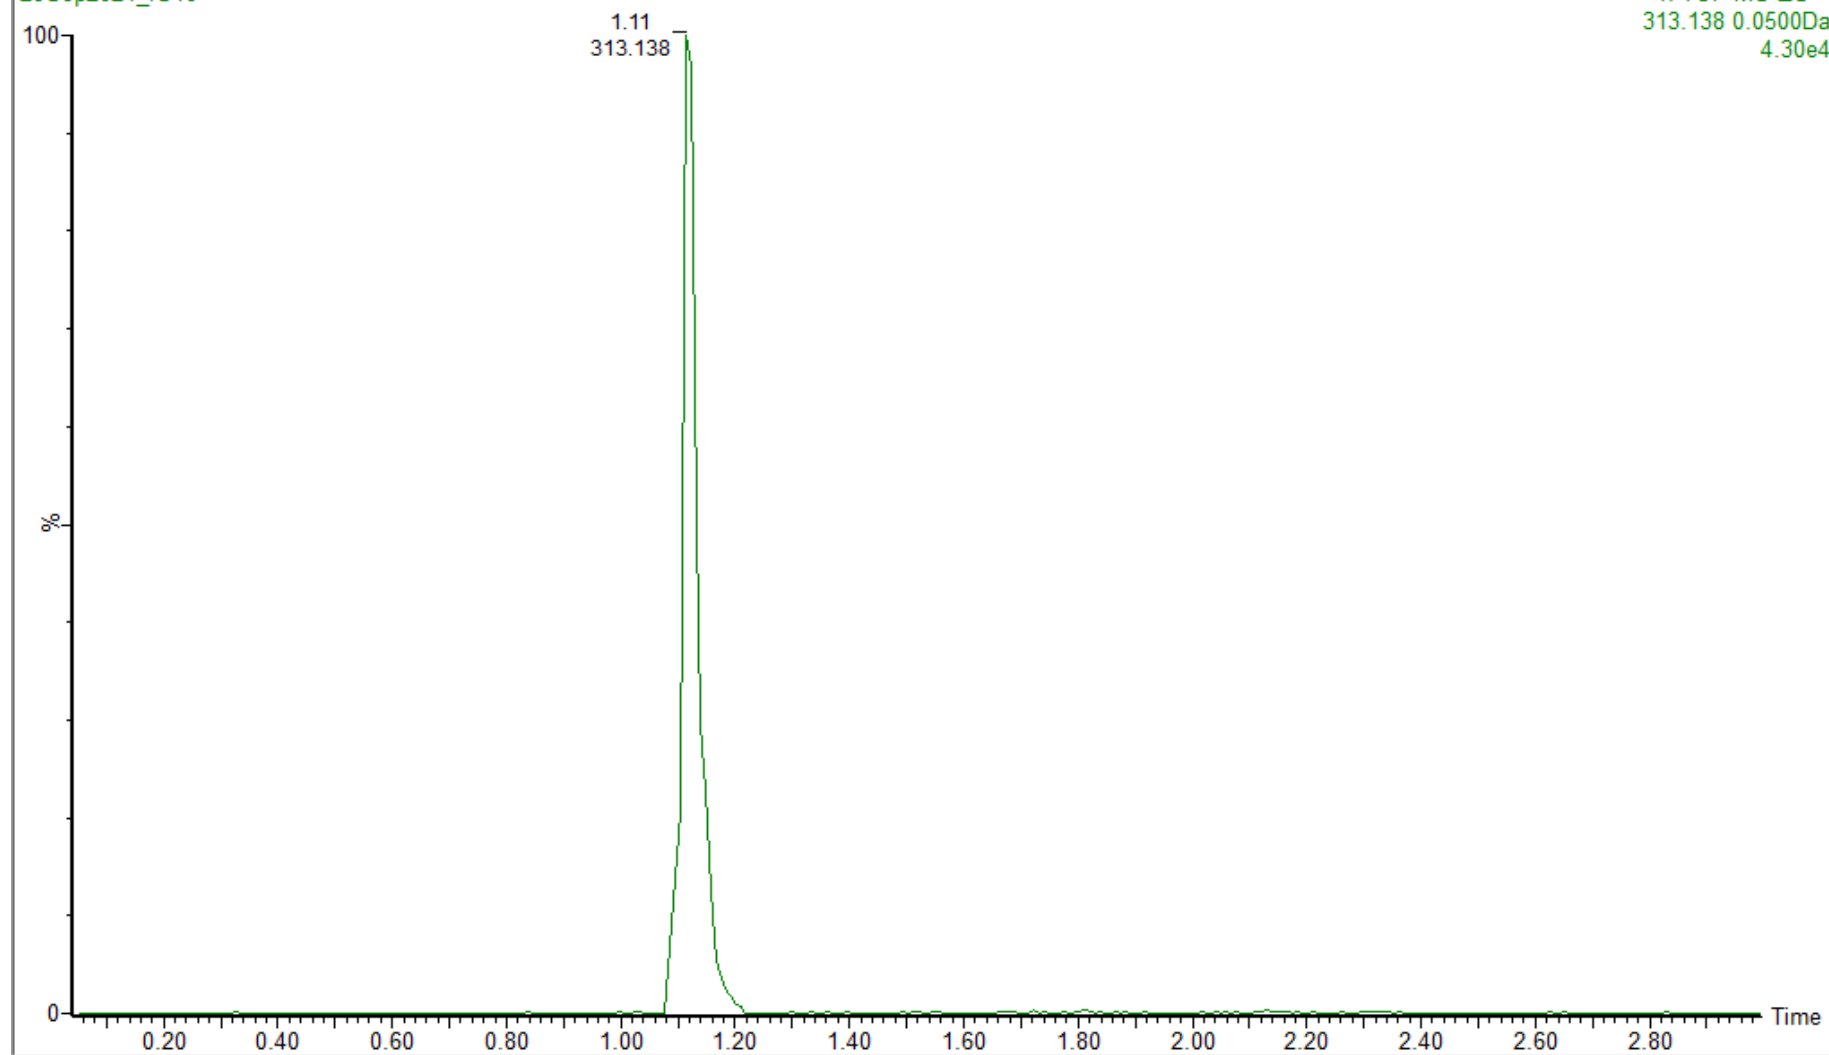

**2-(2-Chloro-4-(trifluoromethyl)phenyl)-6-methyl-1,3,6,2-dioxazaborocane-4,8-dione 8h**

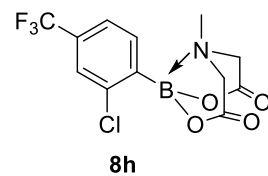

2-(2-chloro-4-(trifluoromethyl)phenyl)-6-methyl-1,3,6,2-dioxazaborocane-4,8-dione

Chemical Formula:  $C_{12}H_{10}BClF_3NO_4$

Molecular Weight: 335.4713

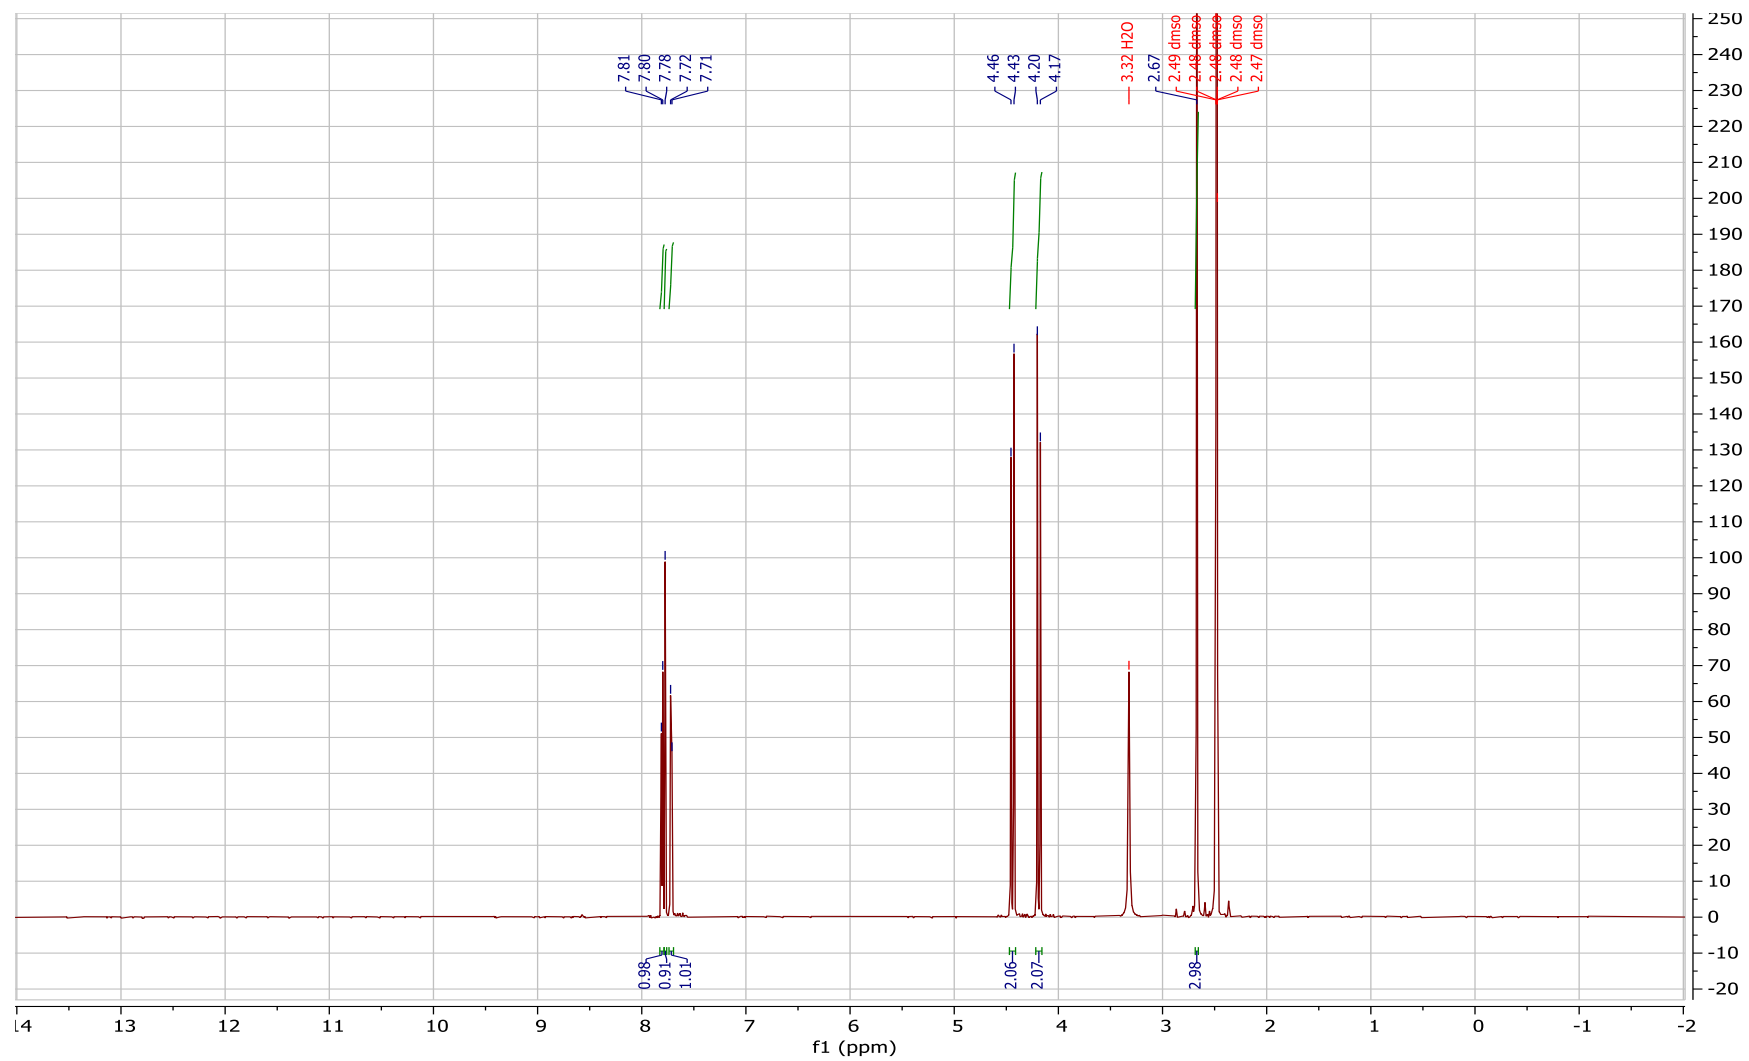

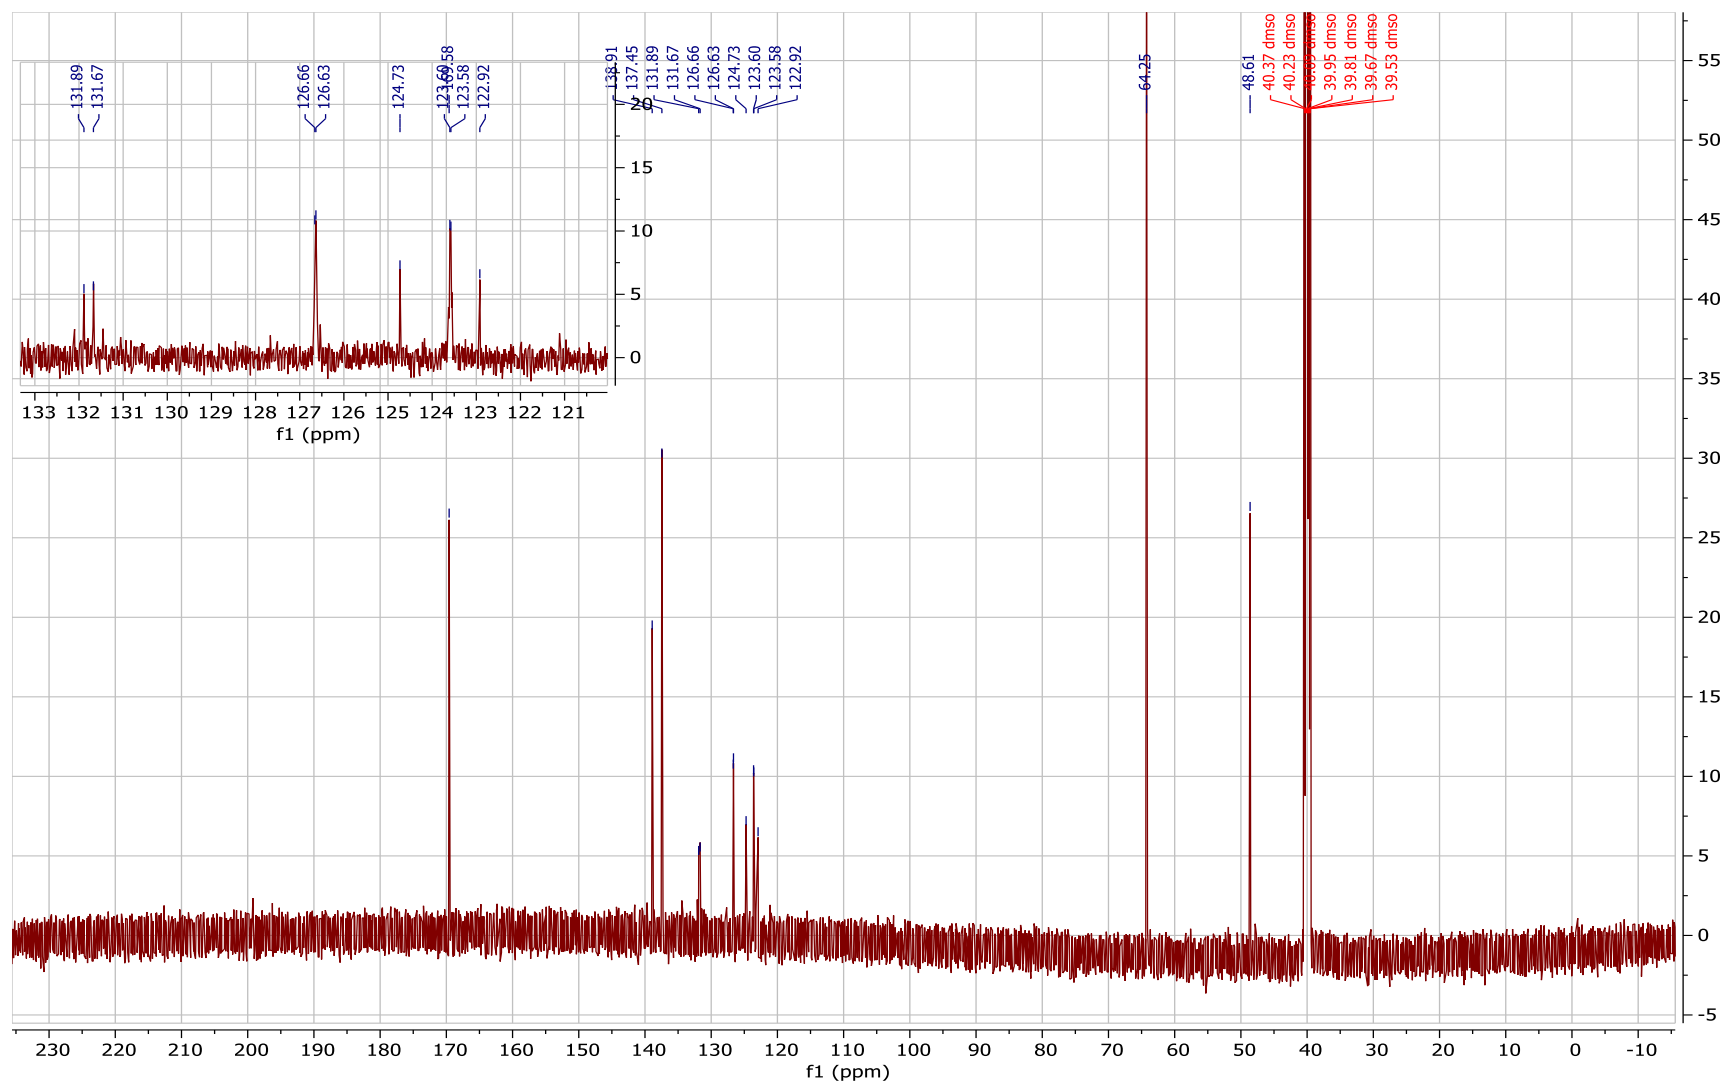

### Single Mass Analysis

Tolerance = 5.0 mDa / DBE: min = -1.5, max = 120.0

Element prediction: Off

Number of isotope peaks used for i-FIT = 3

Monoisotopic Mass, Even Electron Ions

236 formula(e) evaluated with 1 results within limits (up to 20 best isotopic matches for each mass)

Elements Used:

| Mass     | Calc. Mass | mDa  | PPM  | DBE | Formula                 | i-FIT | i-FIT Norm | Fit Conf % | C  | H  | 11B | N | O | Cl | F |
|----------|------------|------|------|-----|-------------------------|-------|------------|------------|----|----|-----|---|---|----|---|
| 353.0685 | 353.0687   | -0.2 | -0.6 | 5.5 | C12 H14 11B N2 O4 Cl F3 | 197.3 | n/a        | n/a        | 12 | 14 | 1   | 2 | 4 | 1  | 3 |

INTER049

29Sep2021\_IG42 126 (1.254) Cm (124:127)

1: TOF MS ES+  
3.82e+004

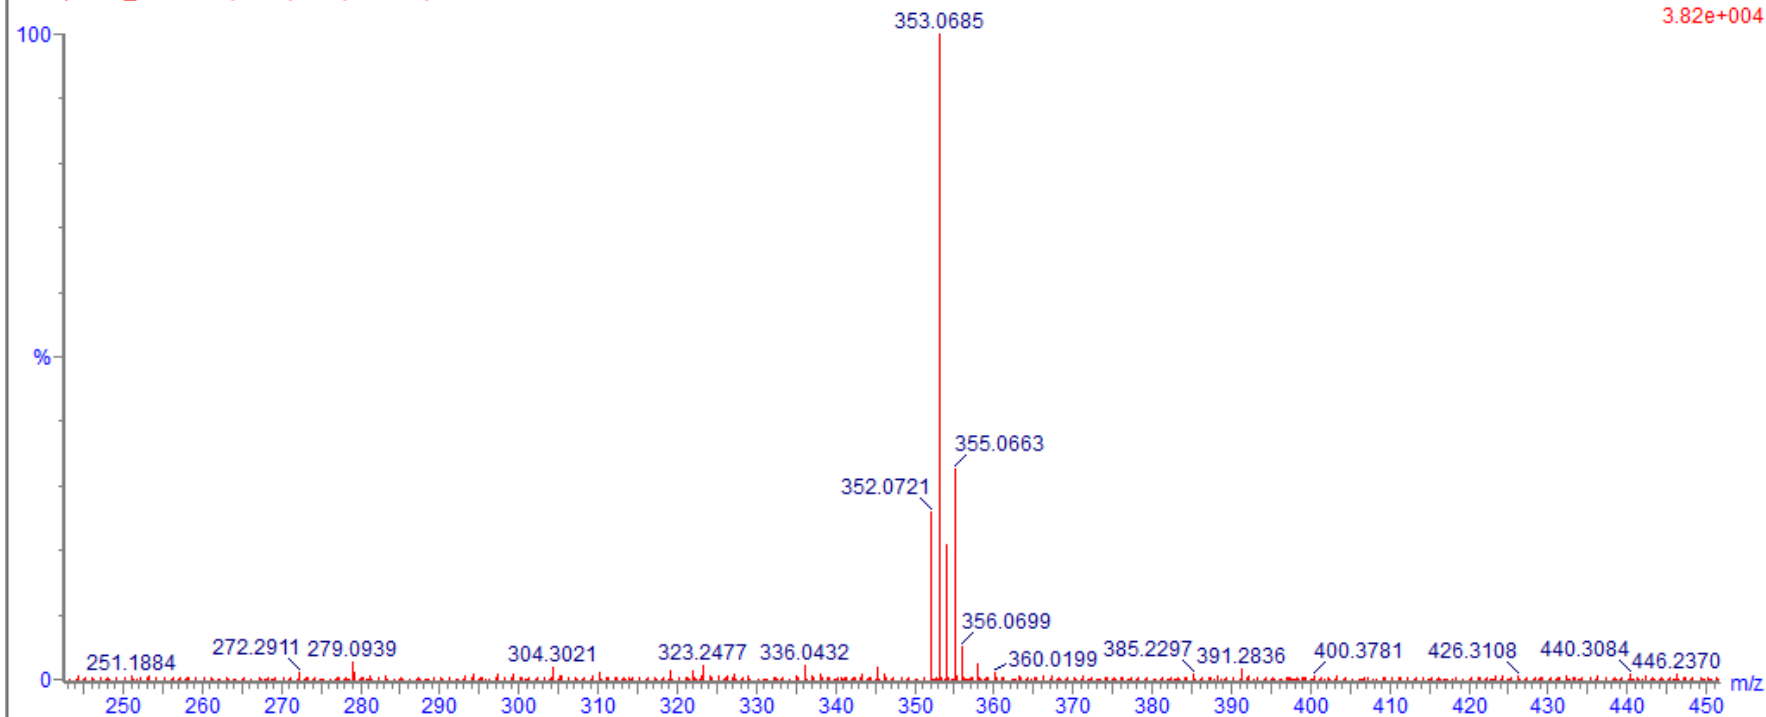

INTER049

29Sep2021\_IG42

1: TOF MS ES+  
353.069 0.0500Da  
1.93e4

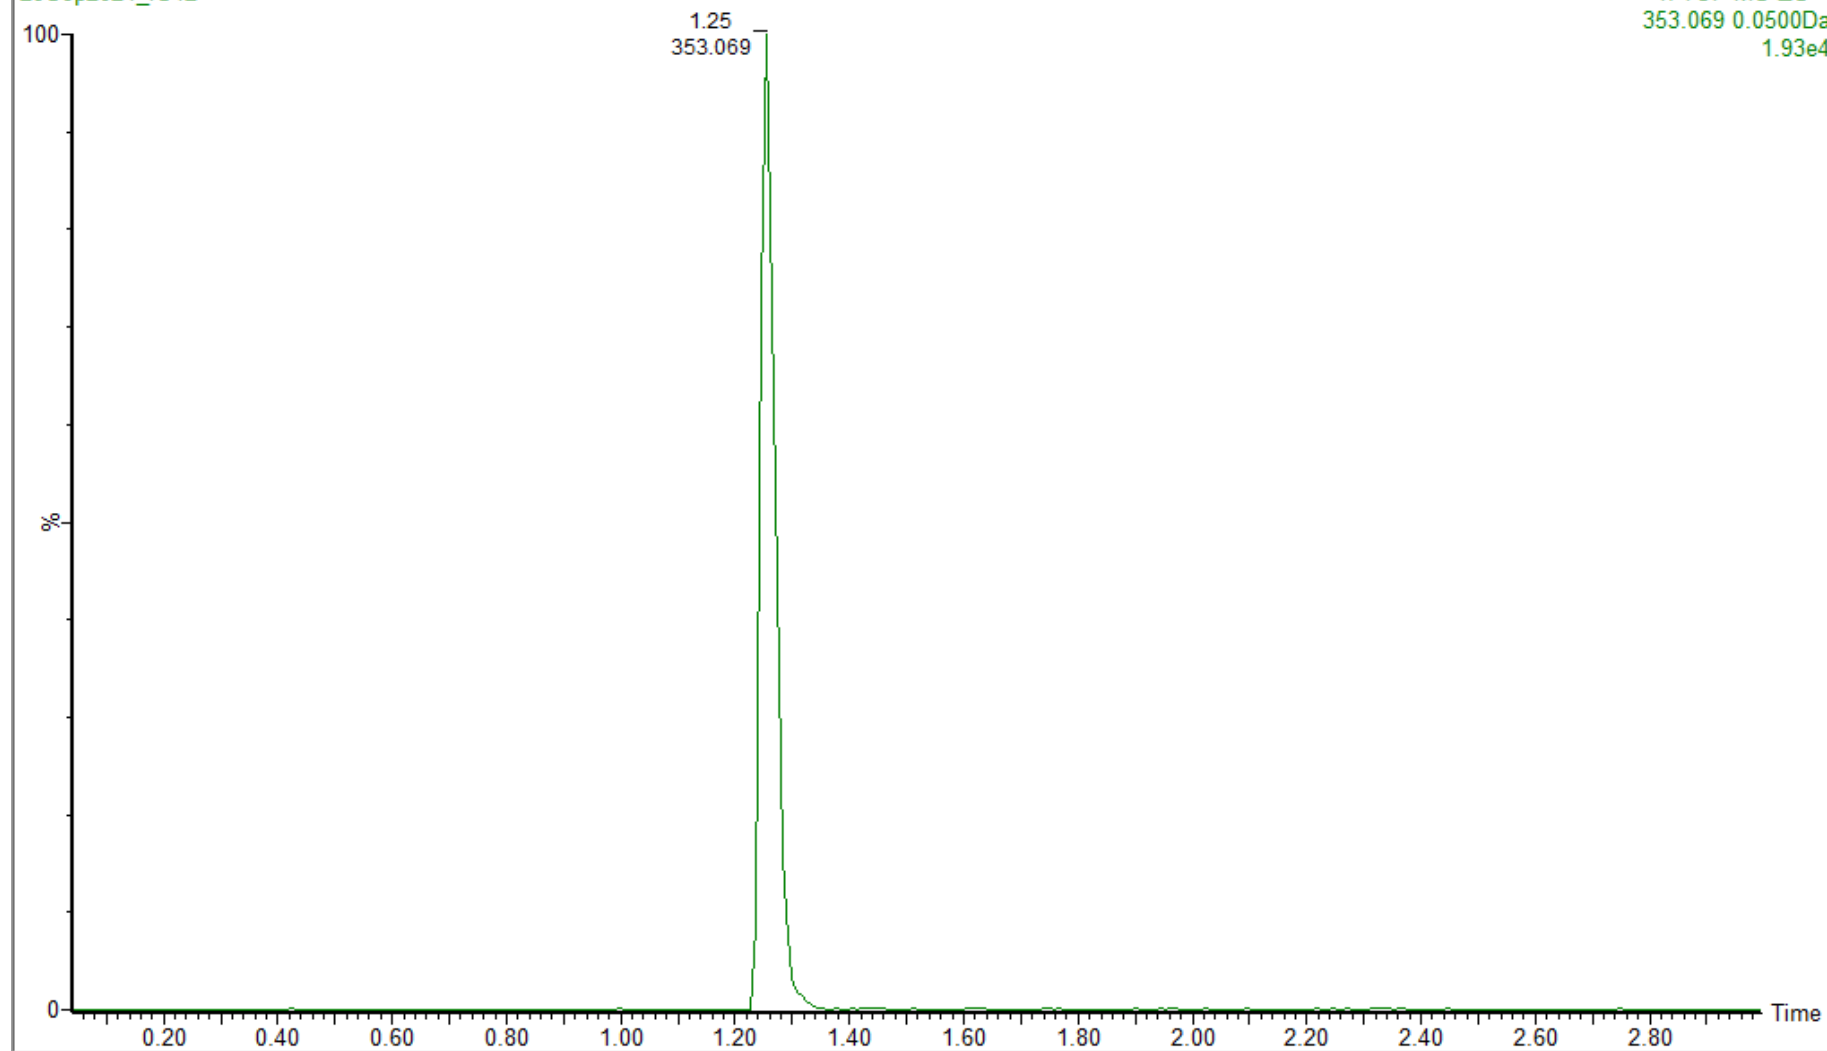



**2-(2,4-difluorophenyl)-6-methyl-1,3,6,2-dioxazaborocane-4,8-dione 8i**

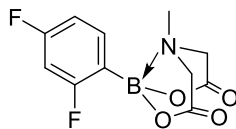

**8i**

2-(2,4-difluorophenyl)-6-methyl-1,3,6,2-dioxazaborocane-4,8-dione

Chemical Formula:  $C_{11}H_{10}BF_2NO_4$

Molecular Weight: 269.0092

Yield = 209.7 mg, (78%).

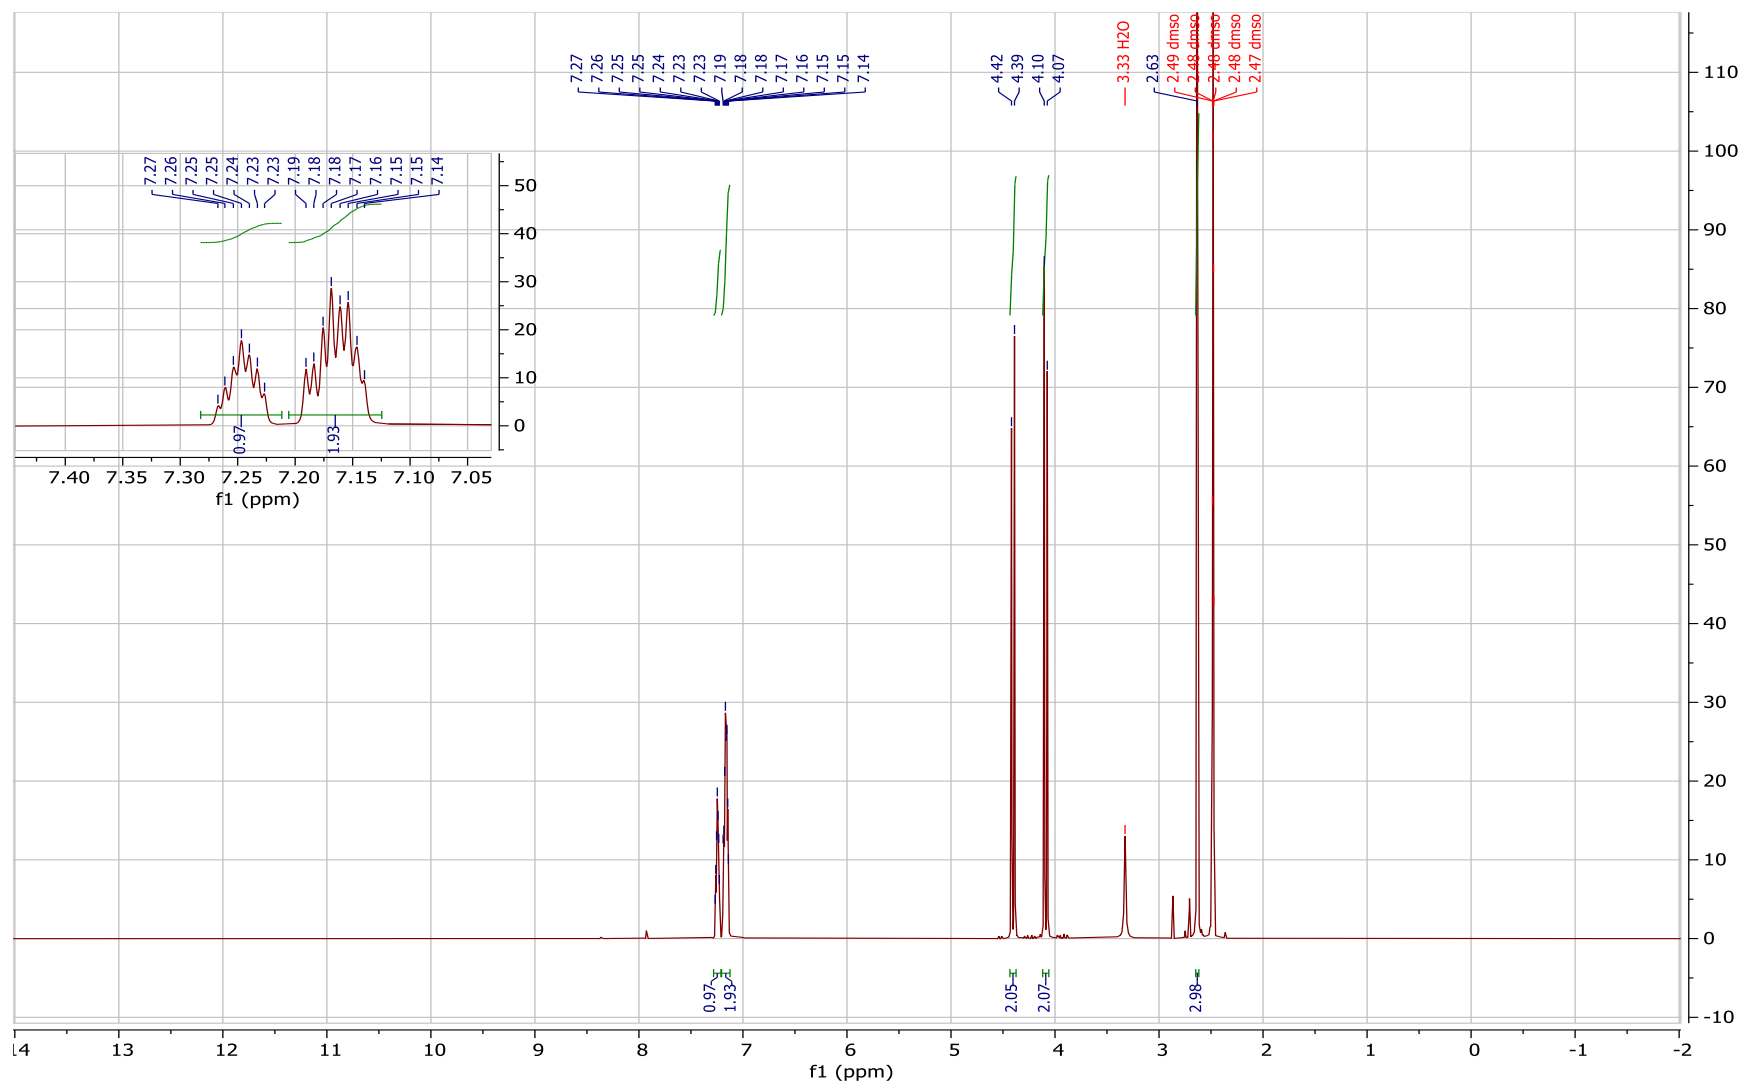

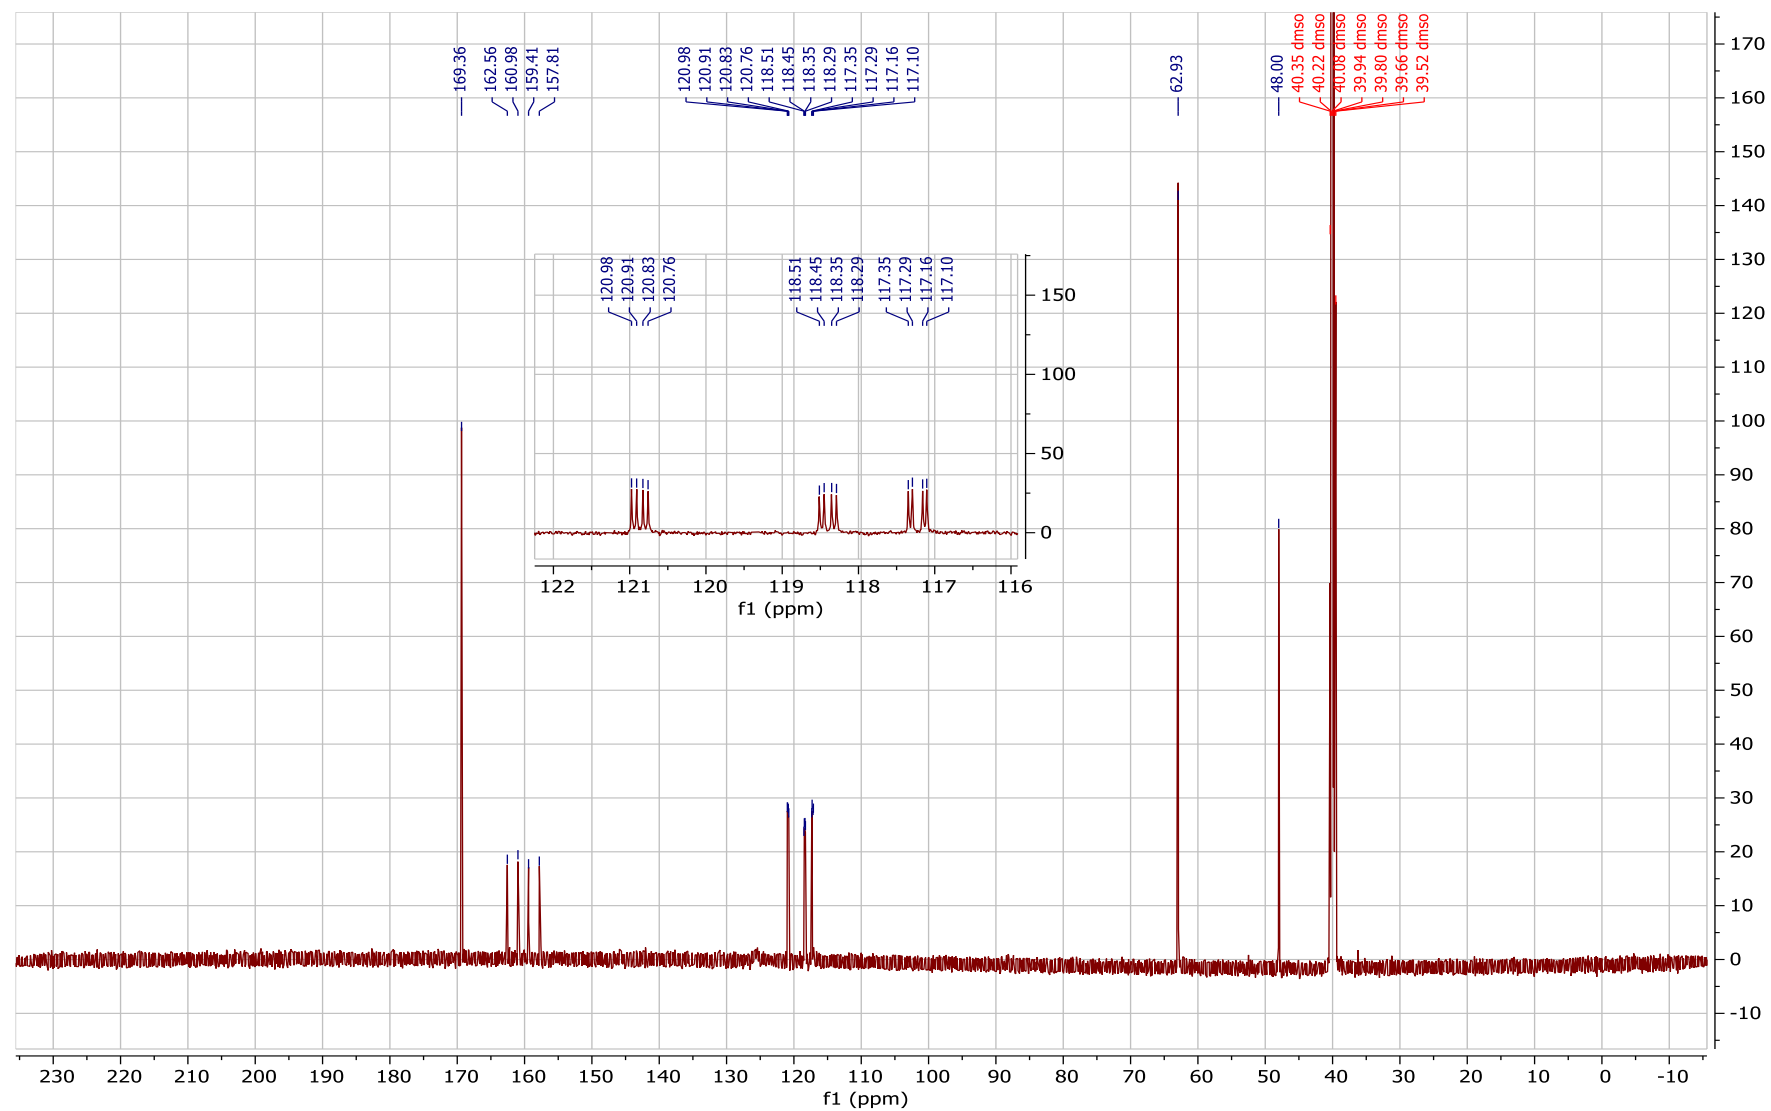

### Single Mass Analysis

Tolerance = 5.0 mDa / DBE: min = -1.5, max = 120.0

Element prediction: Off

Number of isotope peaks used for i-FIT = 3

Monoisotopic Mass, Even Electron Ions

56 formula(e) evaluated with 1 results within limits (up to 20 best isotopic matches for each mass)

Elements Used:

| Mass     | Calc. Mass | mDa  | PPM  | DBE | Formula             | i-FIT | i-FIT Norm | Fit Conf % | C  | H  | 11B | N | O | F |
|----------|------------|------|------|-----|---------------------|-------|------------|------------|----|----|-----|---|---|---|
| 270.0743 | 270.0749   | -0.6 | -2.2 | 6.5 | C11 H11 11B N O4 F2 | 141.6 | n/a        | n/a        | 11 | 11 | 1   | 1 | 4 | 2 |

INTER050

29Sep2021\_JG44 105 (1.051) Cm (103:108)

1: TOF MS ES+  
7.21e+004

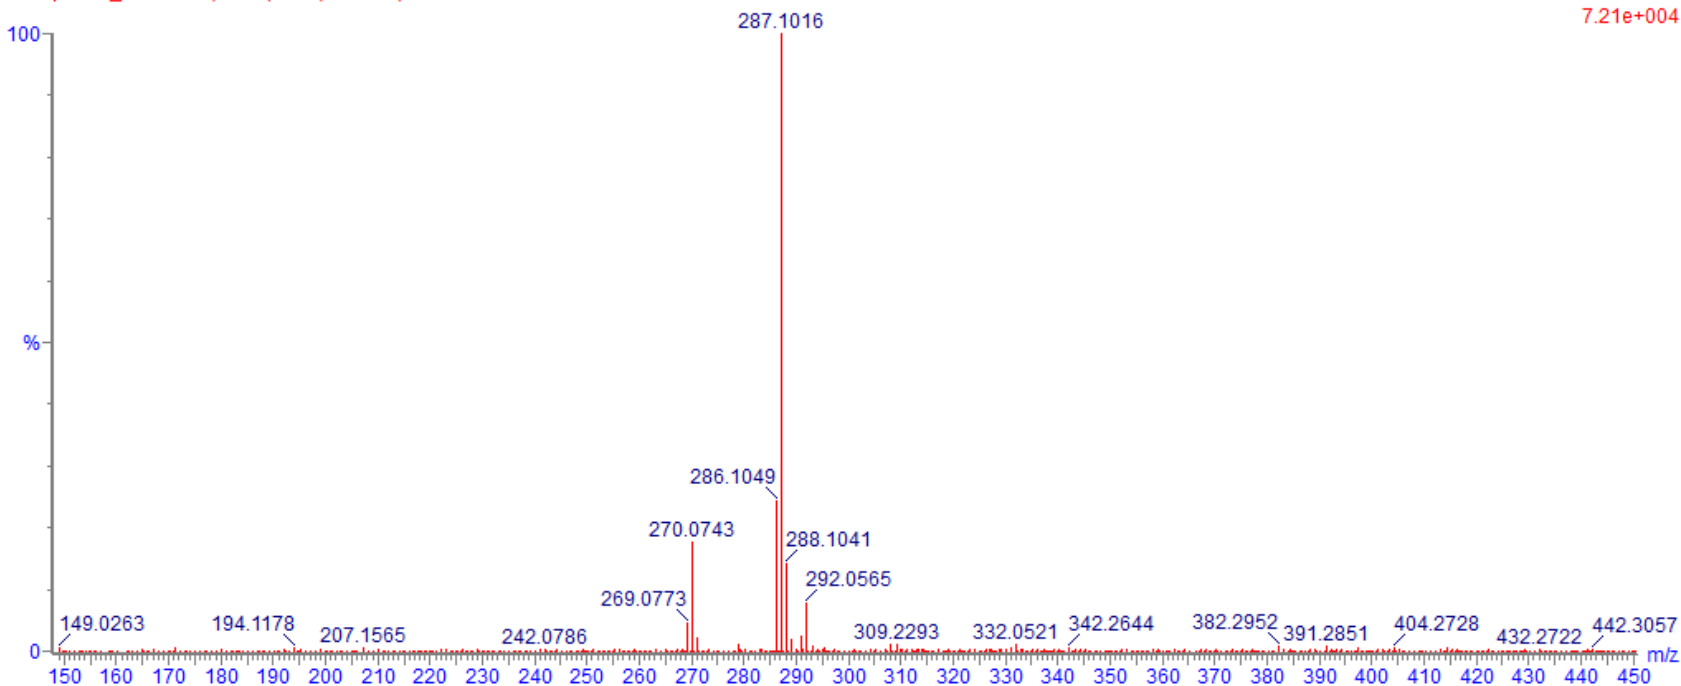

INTER050

29Sep2021\_IG44

1: TOF MS ES+  
287.102 0.0500Da  
2.73e4

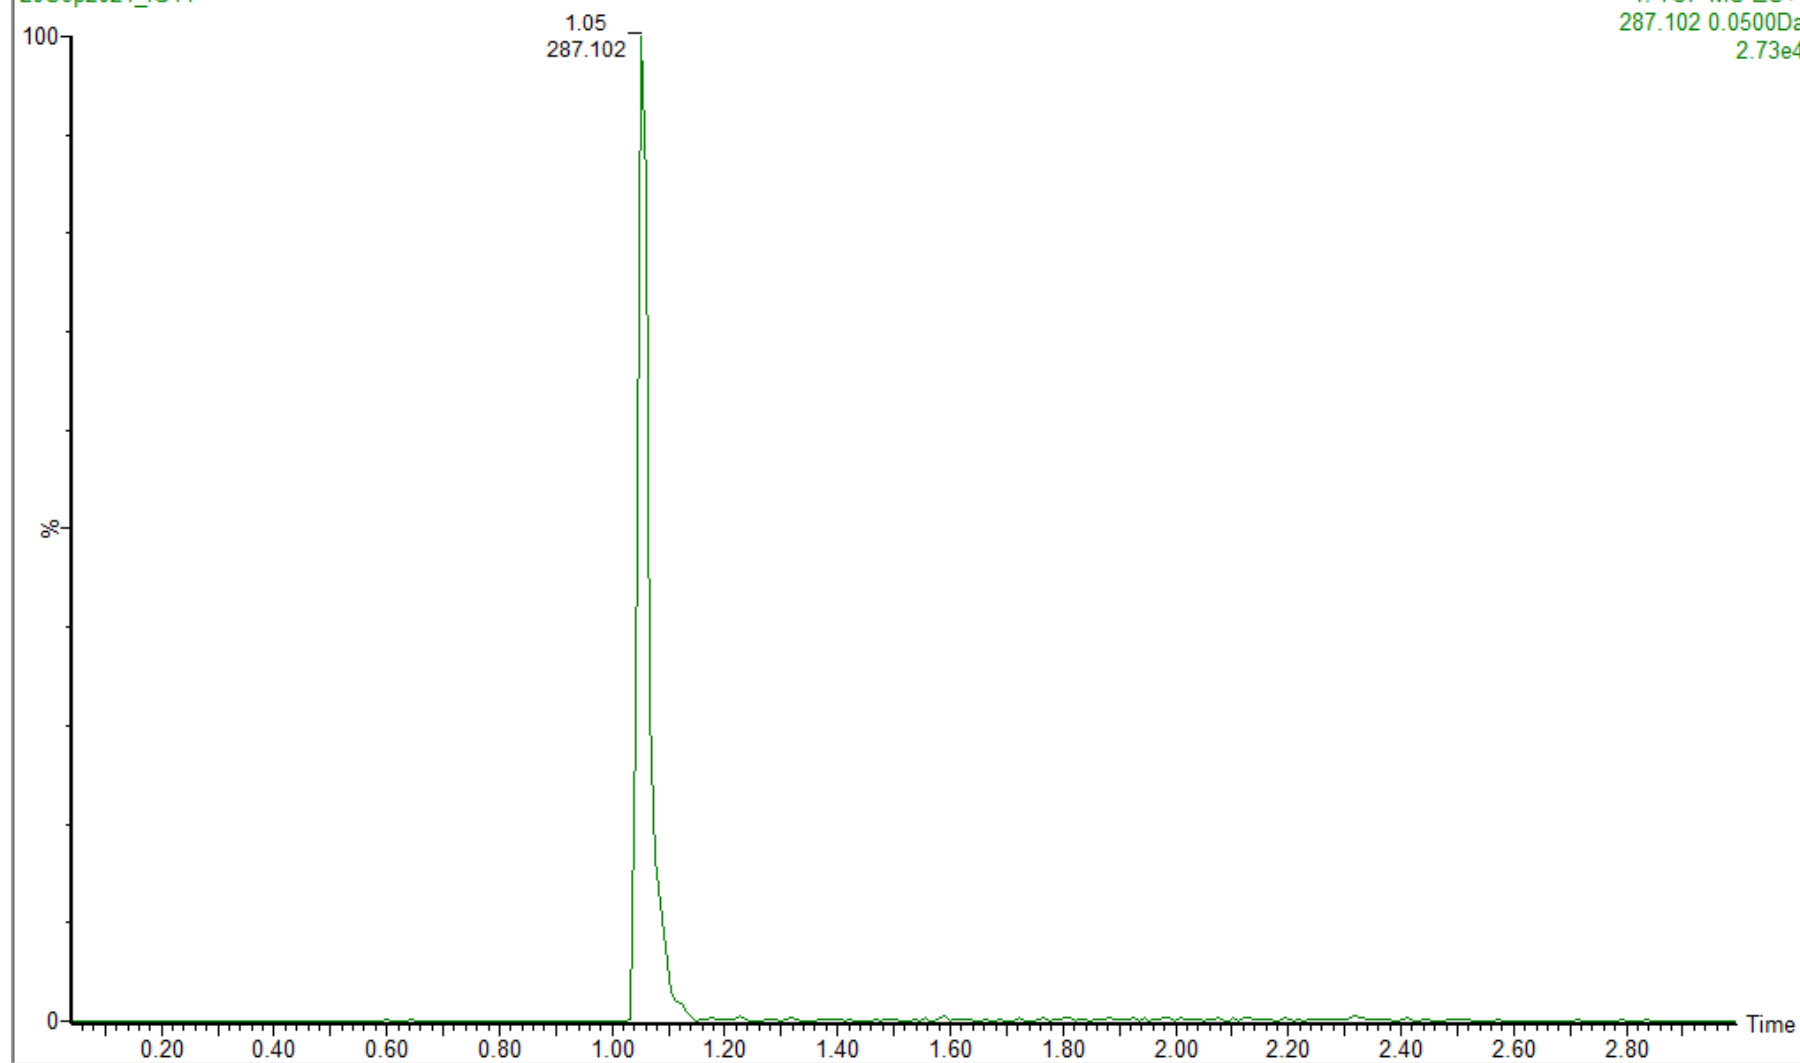

**N-(*tert*-butyl)-3-(6-methyl-4,8-dioxo-1,3,6,2-dioxazaborocan-2-yl)benzamide 8j**

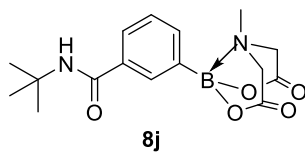

*N*-(*tert*-butyl)-3-(6-methyl-4,8-dioxo-1,3,6,2-dioxazaborocan-2-yl)benzamide

Chemical Formula: C<sub>16</sub>H<sub>21</sub>BN<sub>2</sub>O<sub>5</sub>

Molecular Weight: 332.1593

Yield = 129.0 mg (39%).

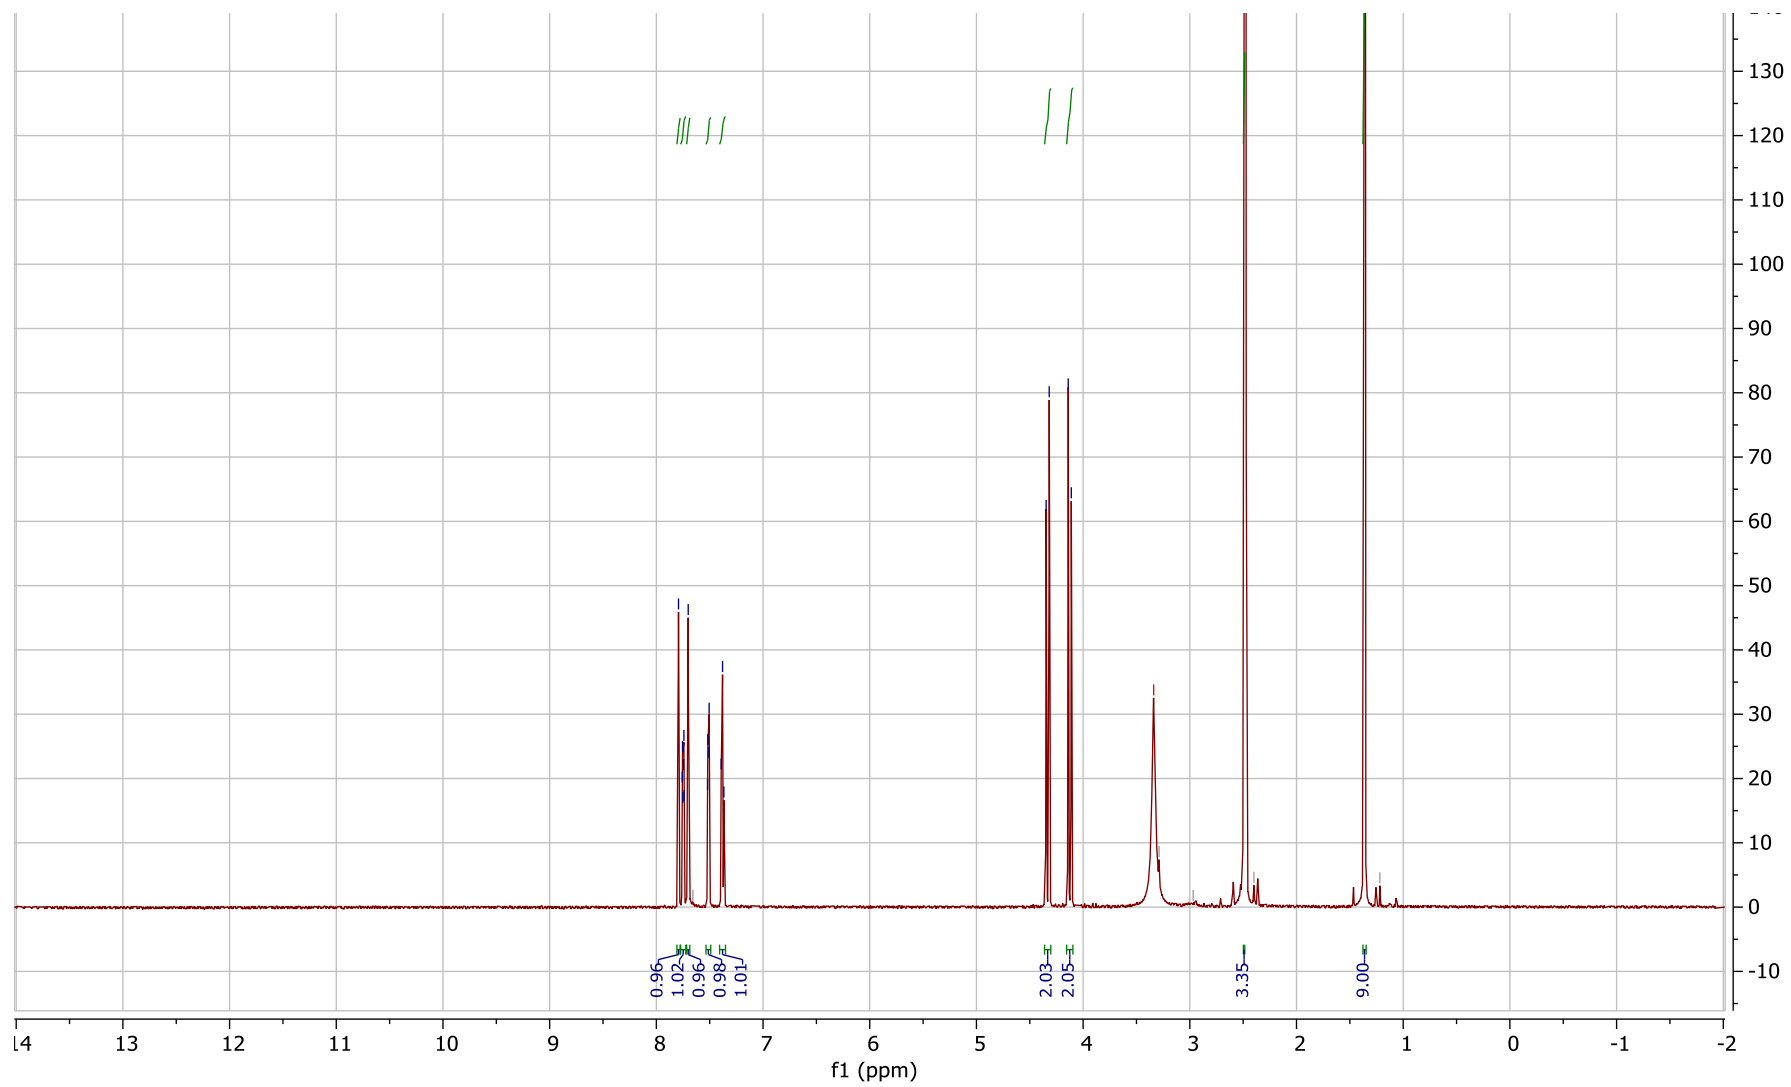

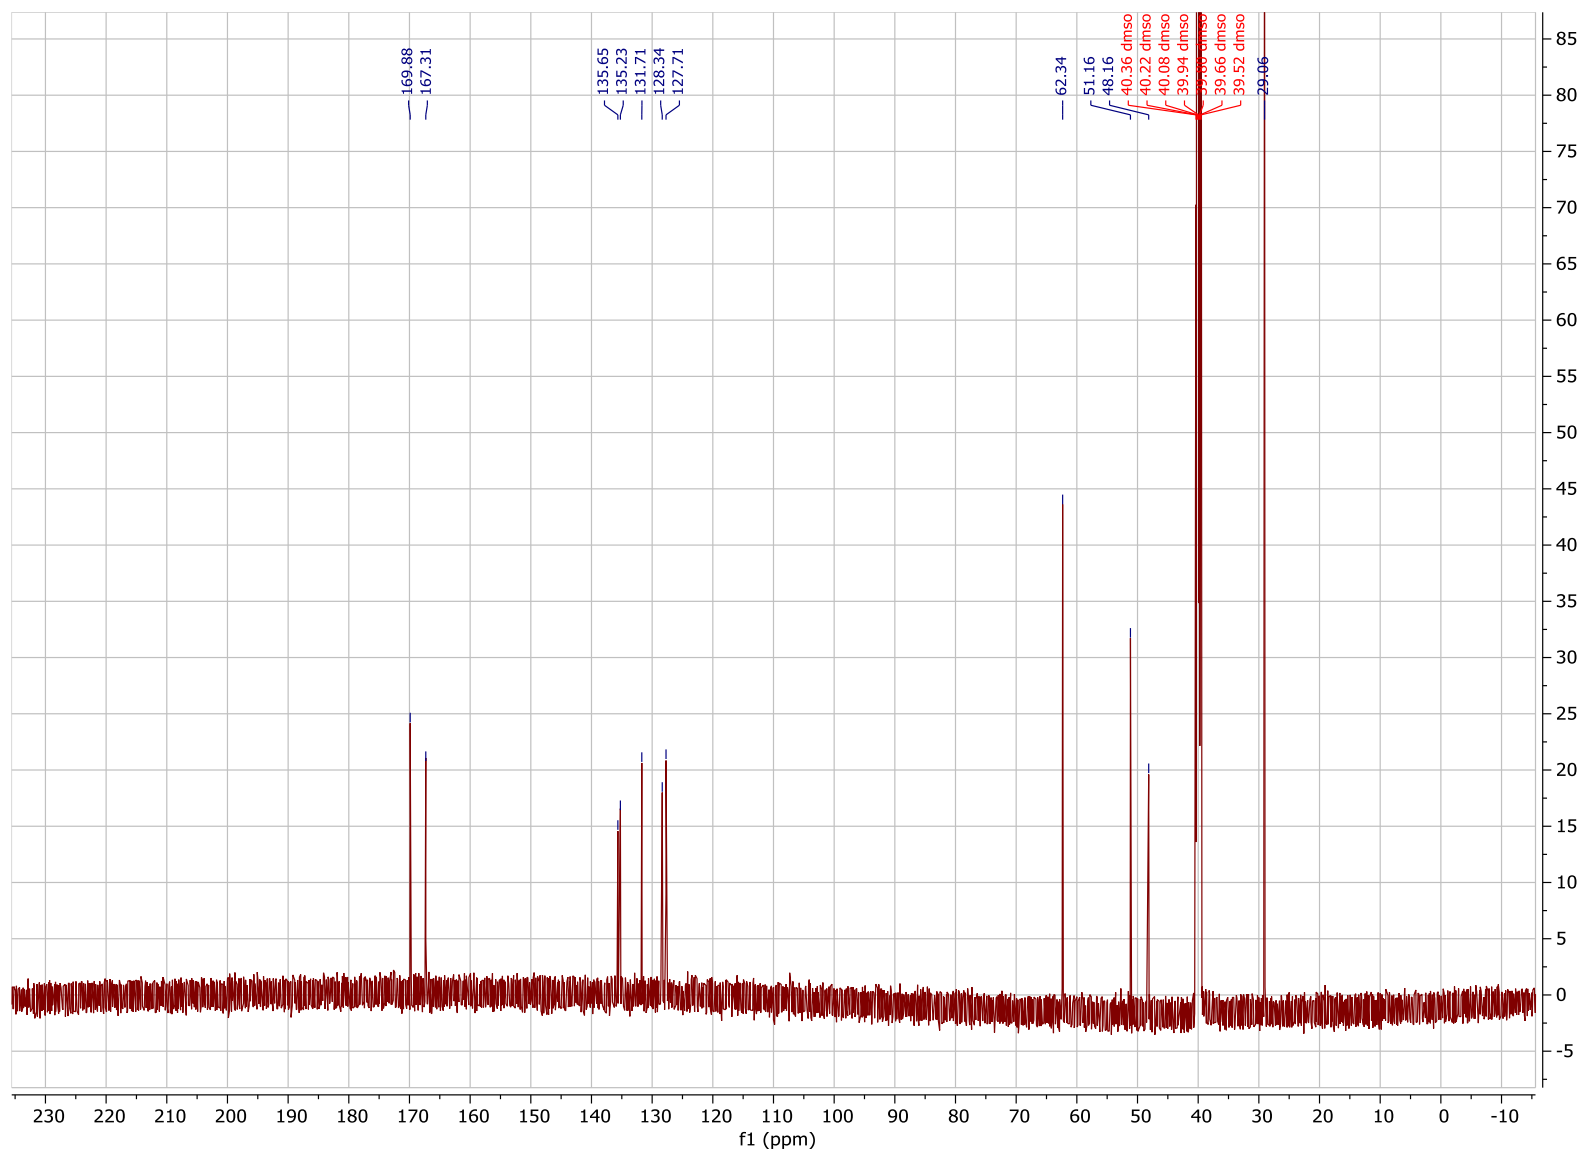



### Single Mass Analysis

Tolerance = 5.0 mDa / DBE: min = -1.5, max = 120.0

Element prediction: Off

Number of isotope peaks used for i-FIT = 3

Monoisotopic Mass, Even Electron Ions

68 formula(e) evaluated with 1 results within limits (up to 20 best isotopic matches for each mass)

Elements Used:

| Mass     | Calc. Mass | mDa | PPM | DBE | Formula                | i-FIT | i-FIT Norm | Fit Conf % | C  | H  | 11B | N | O | 23Na |
|----------|------------|-----|-----|-----|------------------------|-------|------------|------------|----|----|-----|---|---|------|
| 355.1446 | 355.1441   | 0.5 | 1.4 | 7.5 | C16 H21 11B N2 O5 23Na | 101.5 | n/a        | n/a        | 16 | 21 | 1   | 2 | 5 | 1    |

INTER051

29Sep2021\_IG46 107 (1.068) Cm (107:109)

1: TOF MS ES+  
1.24e+006

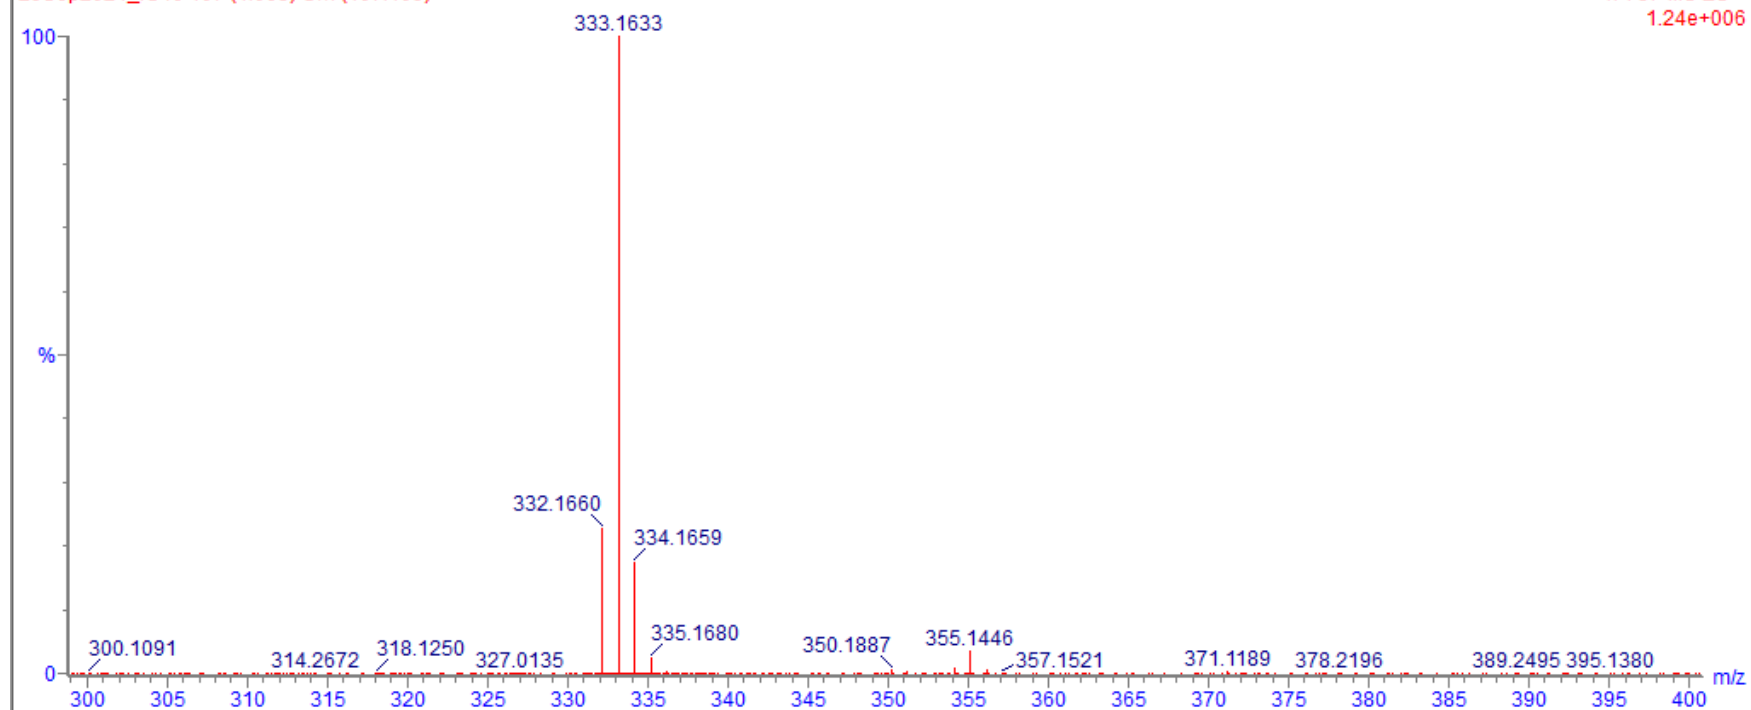

INTER051

29Sep2021\_IG46

1: TOF MS ES+  
333.163 0.0500Da  
5.73e5

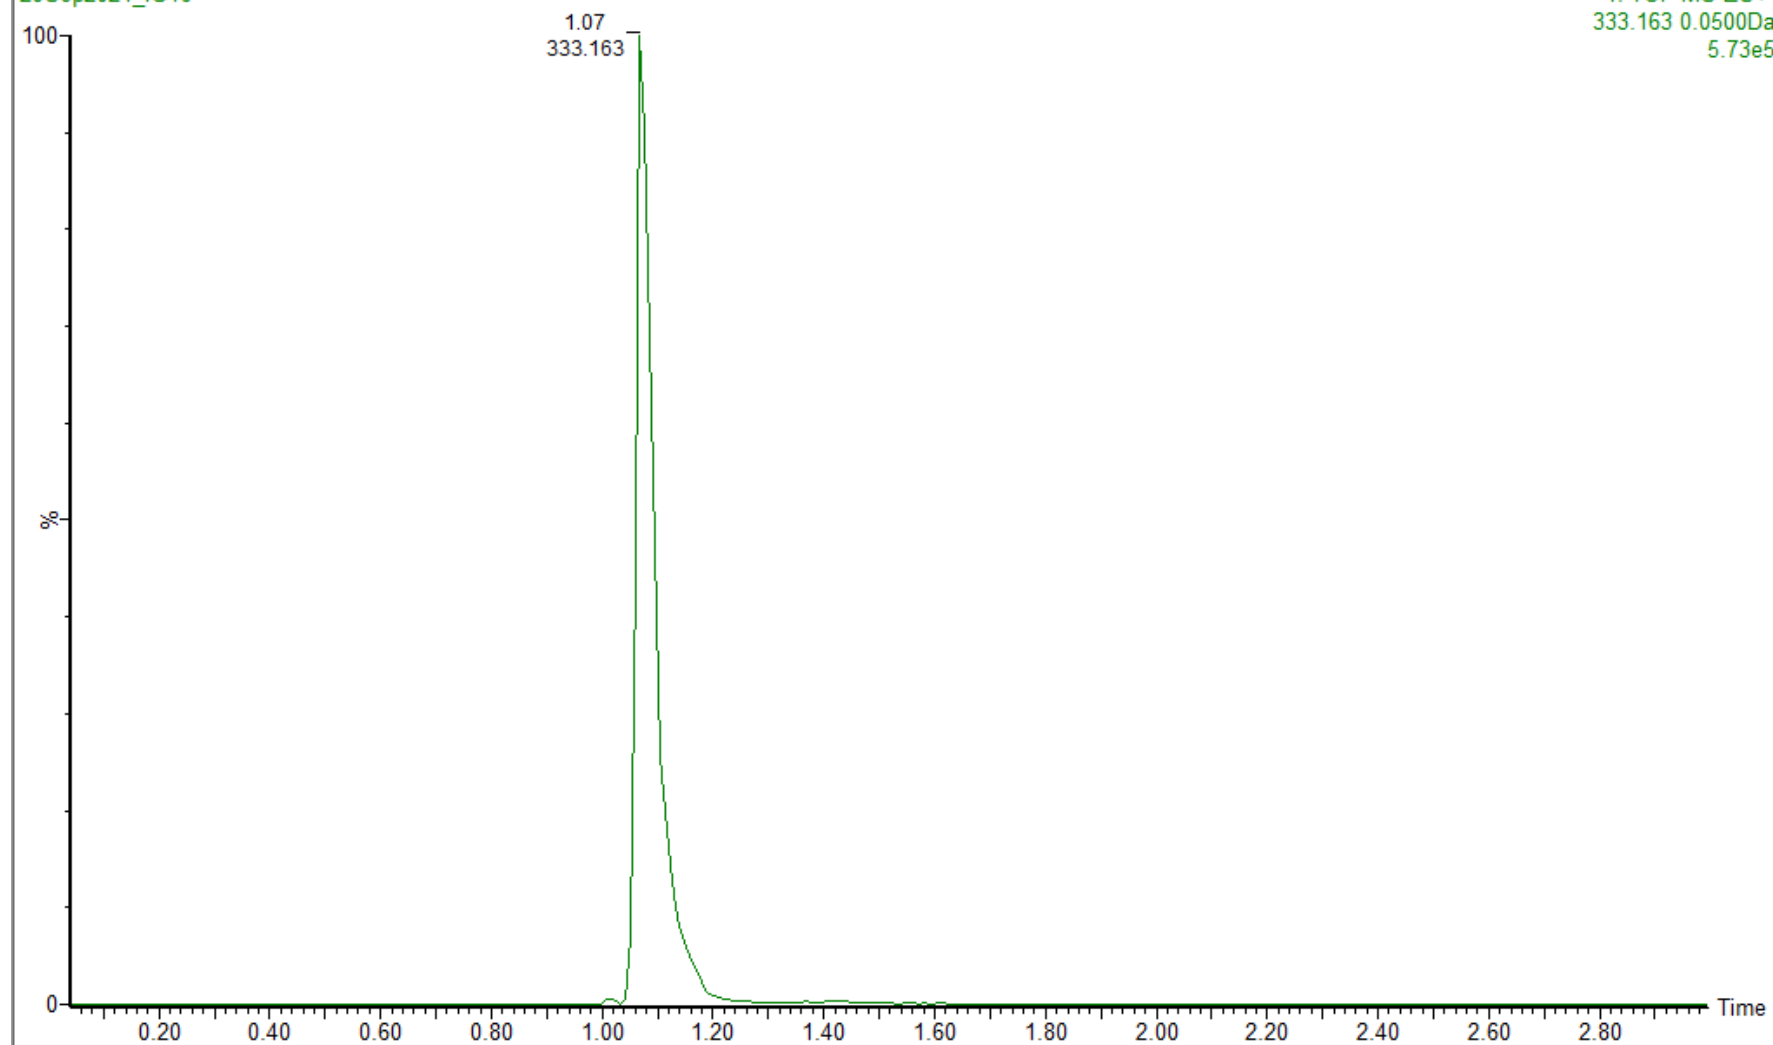

**6-Methyl-2-(4-(pyrrolidine-1-carbonyl)phenyl)-1,3,6,2-dioxazaborocane-4,8-dione 8k**

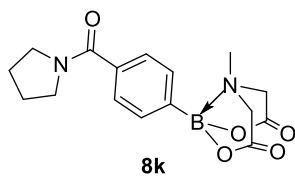

6-methyl-2-(4-(pyrrolidine-1-carbonyl)phenyl)-1,3,6,2-dioxazaborocane-4,8-dione

Chemical Formula:  $C_{16}H_{19}BN_2O_5$

Molecular Weight: 330.1435

Yield = 83.2 mg (25%).

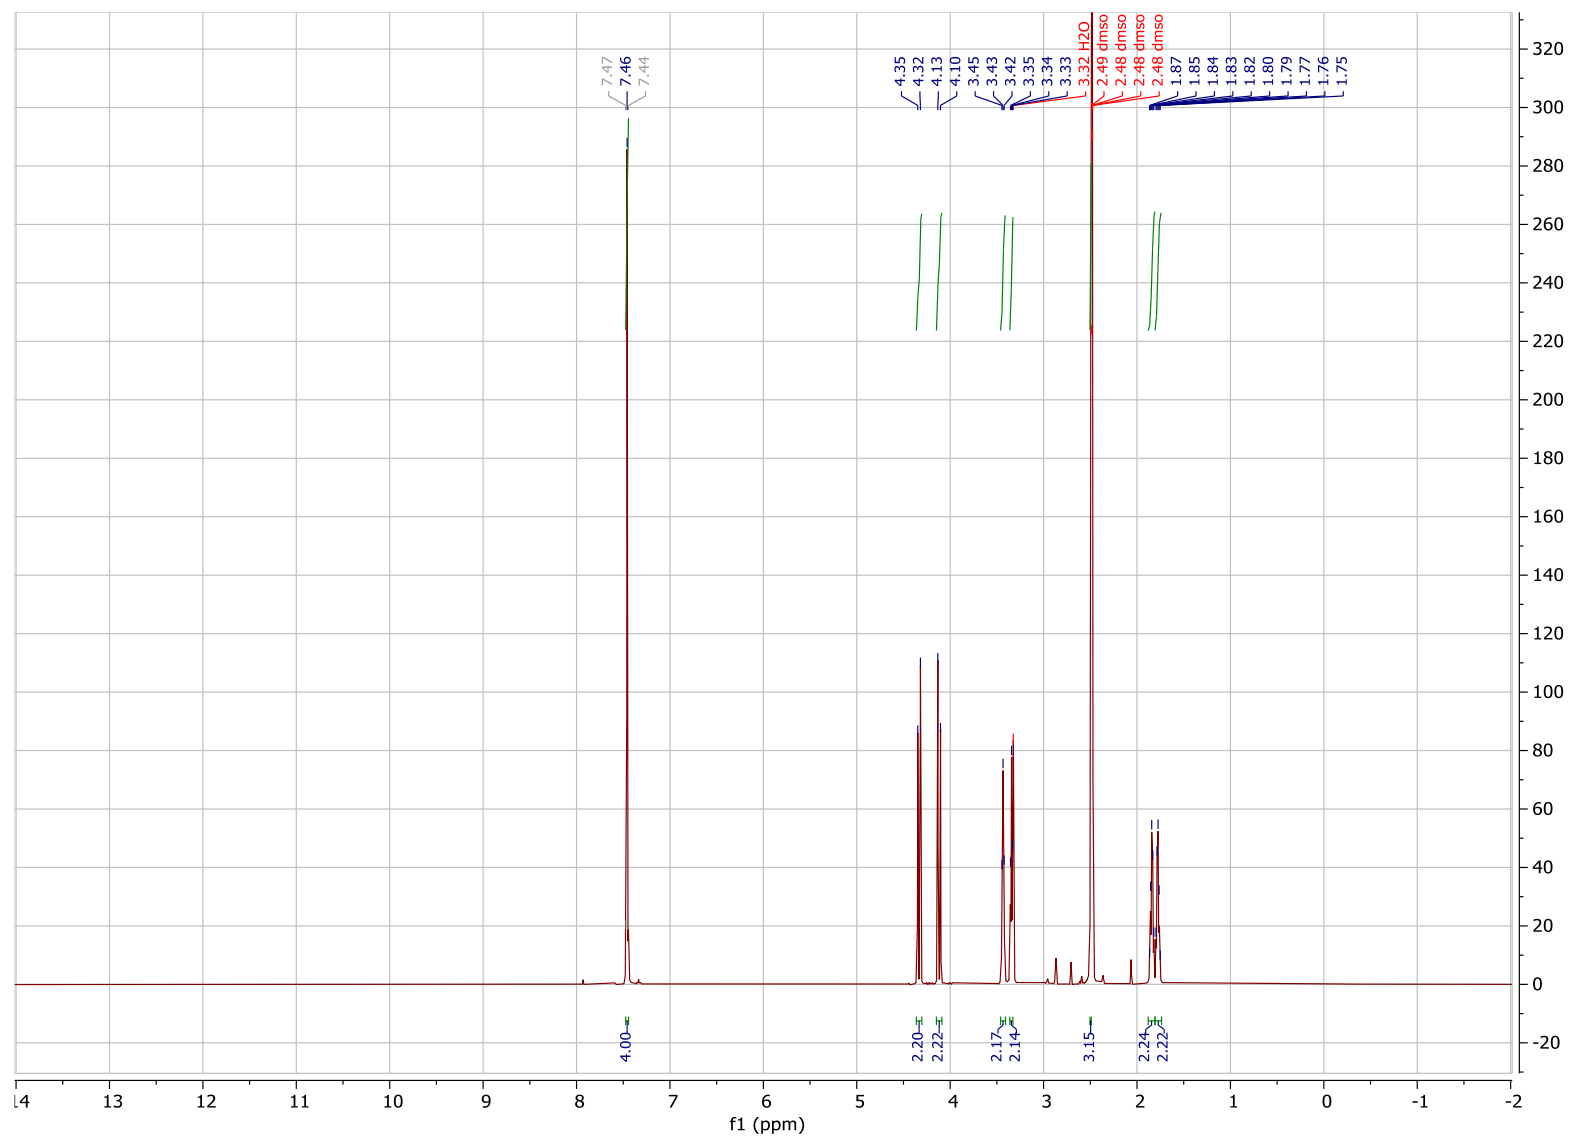

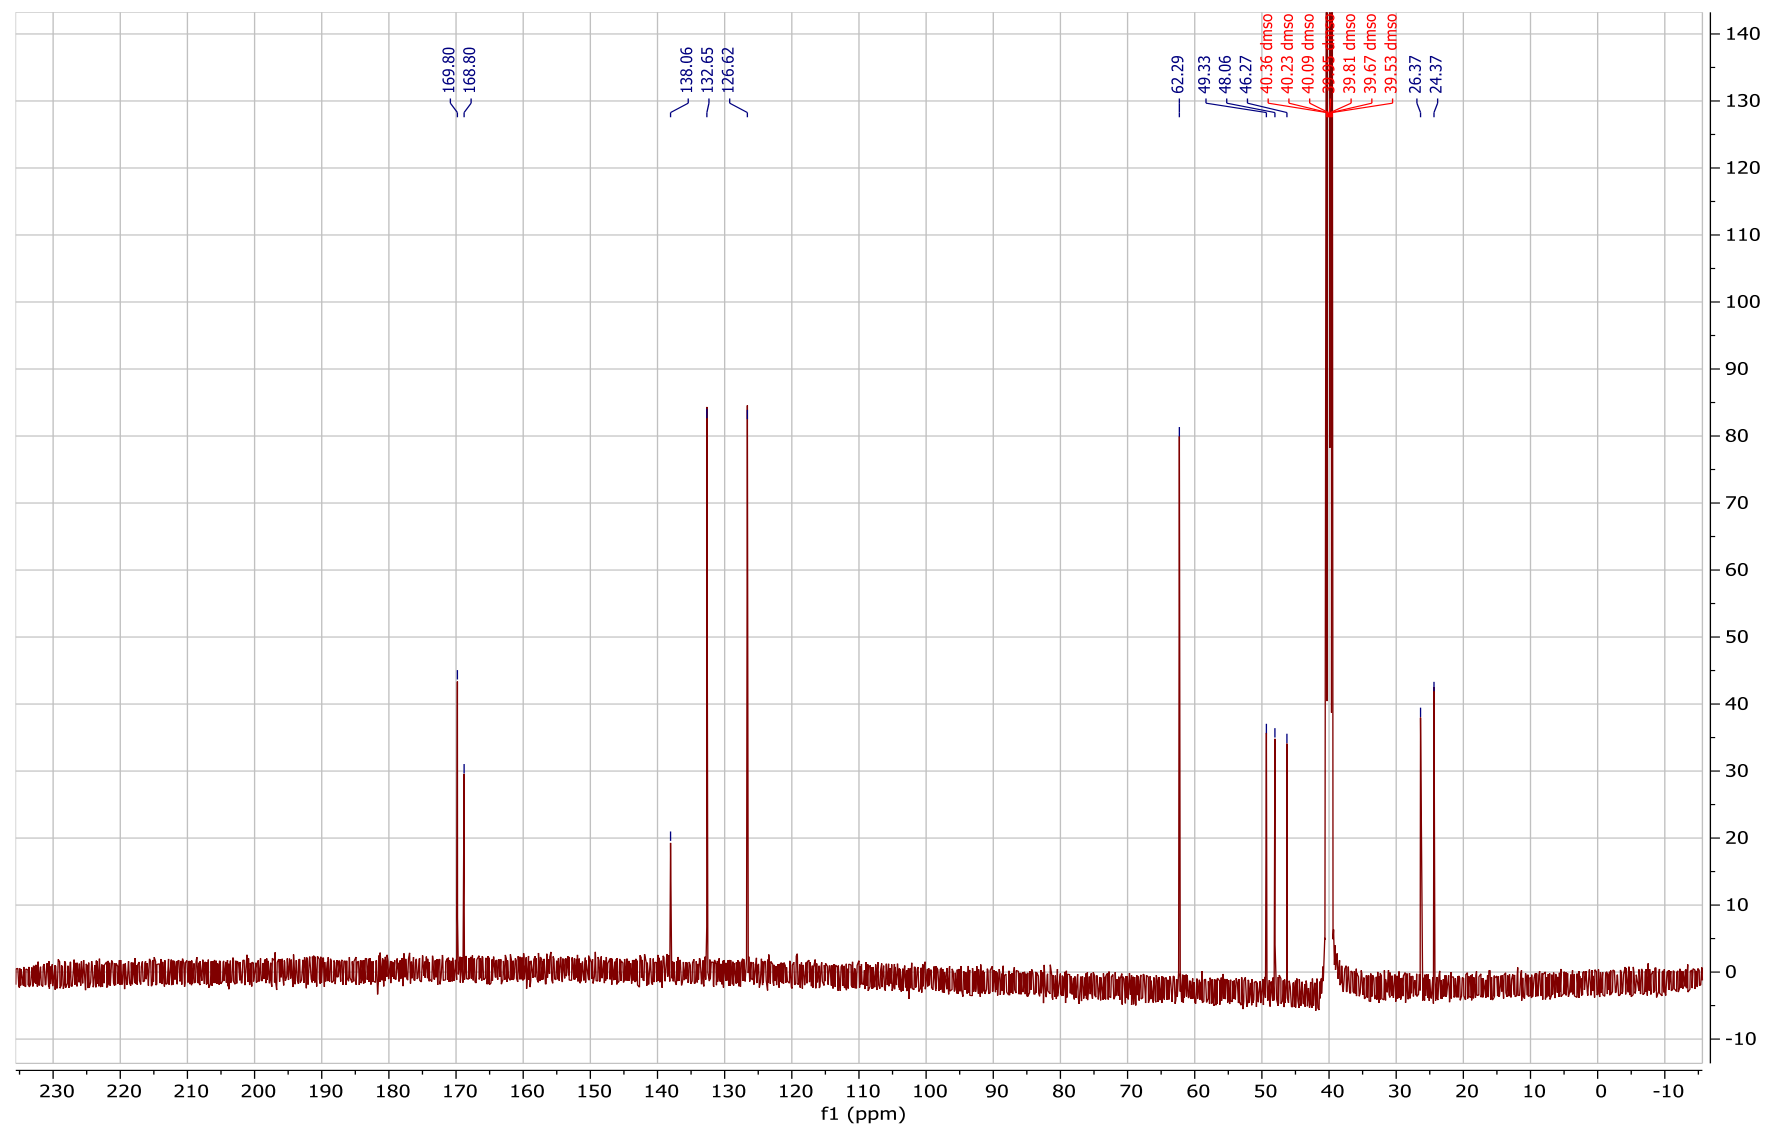

### Single Mass Analysis

Tolerance = 5.0 mDa / DBE: min = -1.5, max = 120.0

Element prediction: Off

Number of isotope peaks used for i-FIT = 3

Monoisotopic Mass, Even Electron Ions

87 formula(e) evaluated with 1 results within limits (up to 20 best isotopic matches for each mass)

Elements Used:

| Mass     | Calc. Mass | mDa | PPM | DBE | Formula                | i-FIT | i-FIT Norm | Fit Conf % | C  | H  | 11B | N | O | 23Na |
|----------|------------|-----|-----|-----|------------------------|-------|------------|------------|----|----|-----|---|---|------|
| 353.1286 | 353.1285   | 0.1 | 0.3 | 8.5 | C16 H19 11B N2 O5 23Na | 172.6 | n/a        | n/a        | 16 | 19 | 1   | 2 | 5 | 1    |

INTER053

29Sep2021\_IG50 93 (0.946) Cm (93:97)

1: TOF MS ES+

9.88e+005

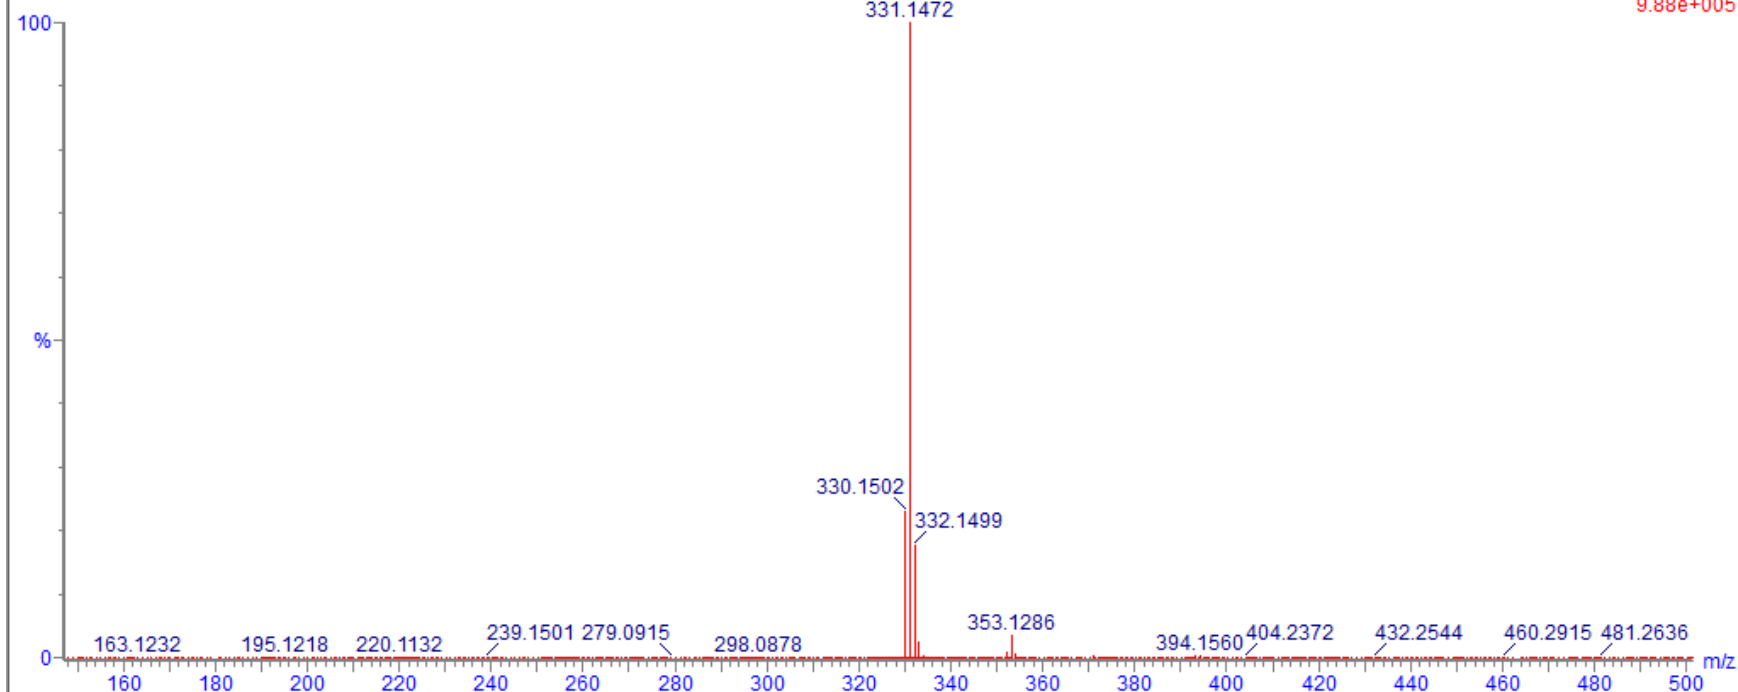

INTER053

29Sep2021\_IG50

1: TOF MS ES+  
331.147 0.0500Da  
4.79e5

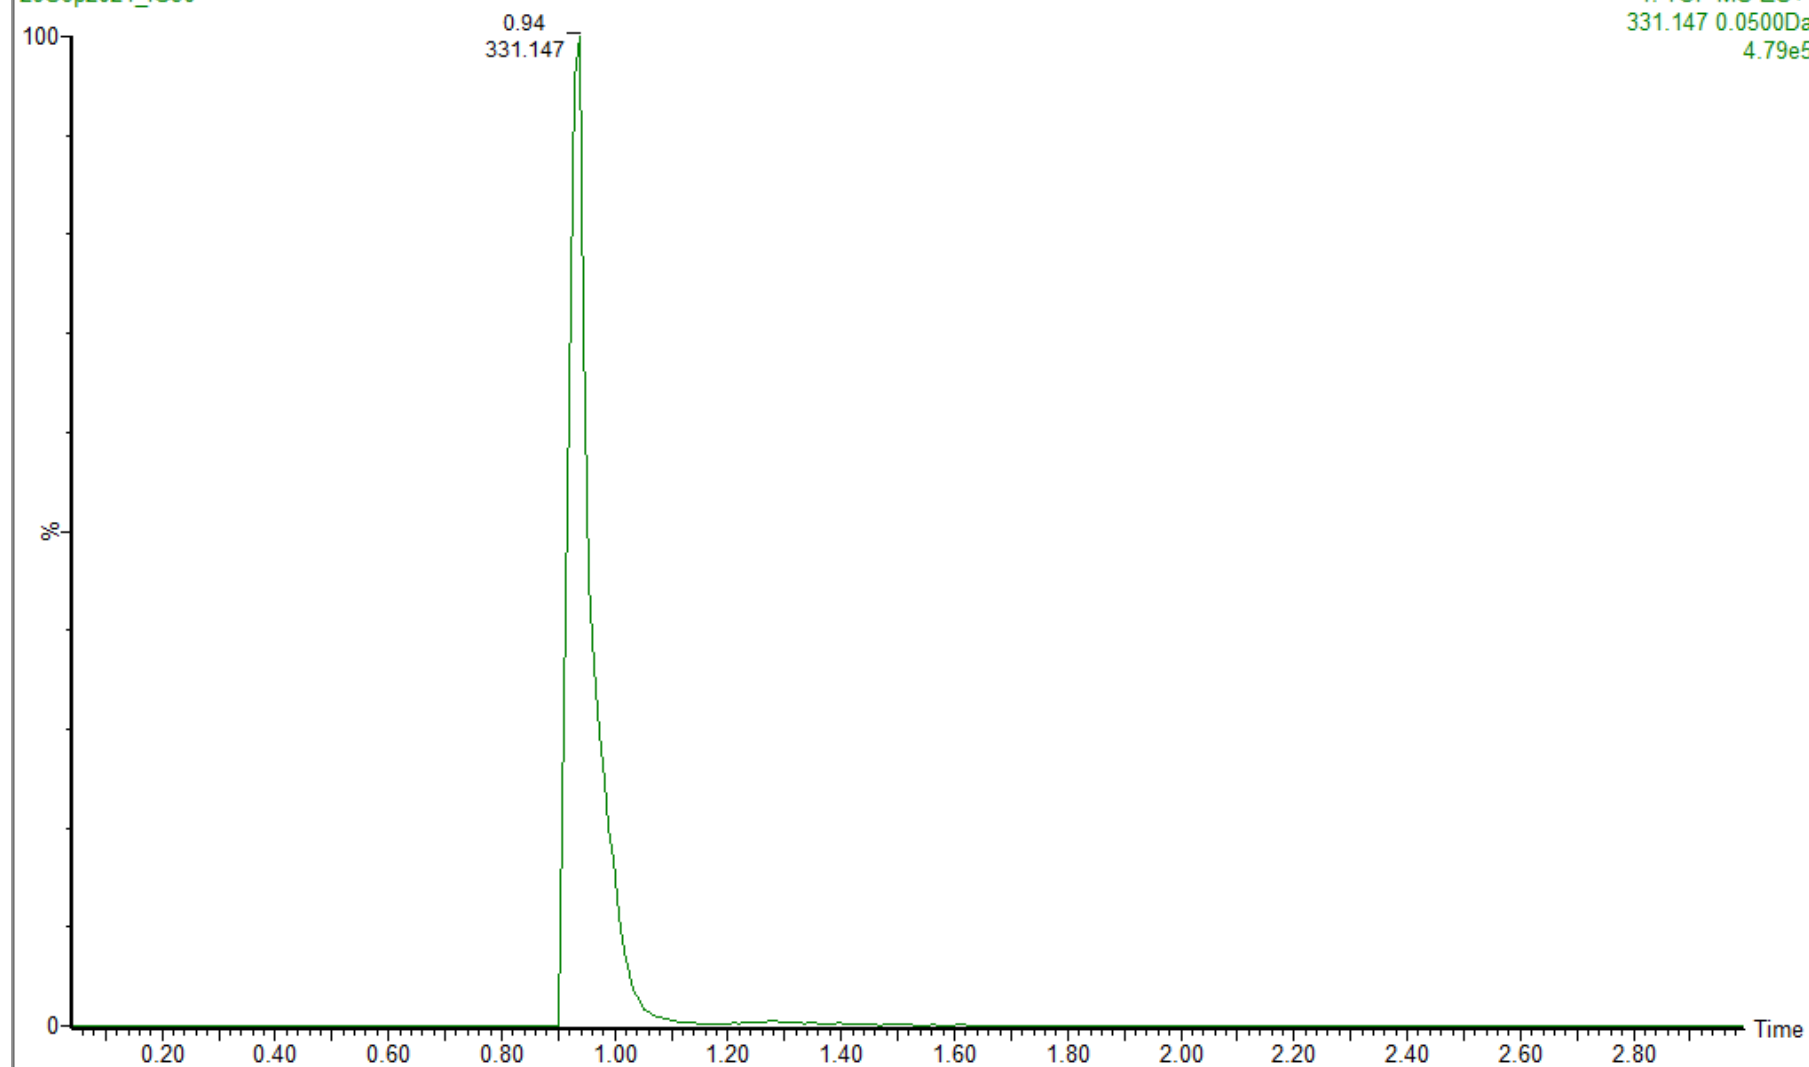

**2-([1,1'-Biphenyl]-3-yl)-6-methyl-1,3,6,2-dioxazaborocane-4,8-dione 8l**

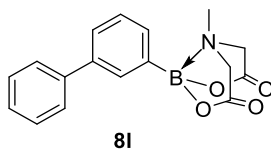

**8l**

2-([1,1'-biphenyl]-3-yl)-6-methyl-1,3,6,2-dioxazaborocane-4,8-dione

Chemical Formula:  $C_{17}H_{16}BNO_4$

Molecular Weight: 309.1242

Yield = 281.6 mg (86%).



PROTON\_01  
AEPD-0050-1

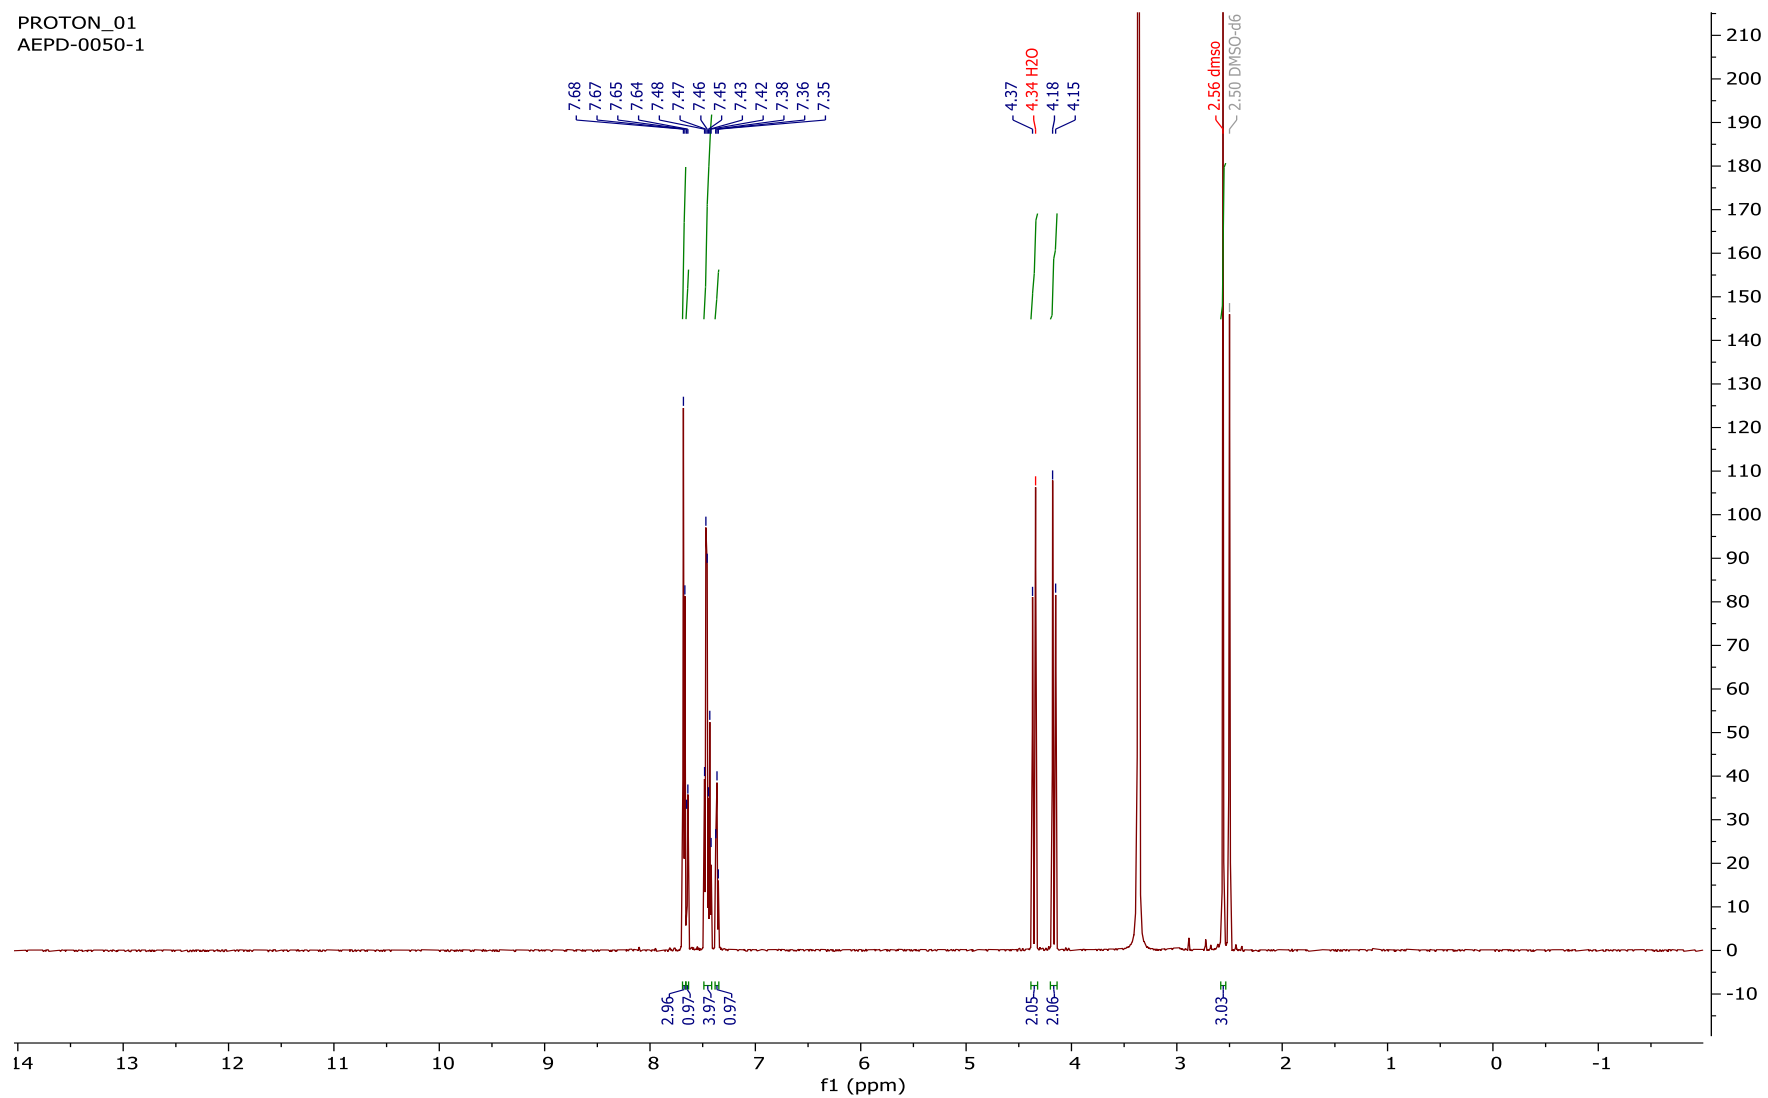

CARBON\_01  
AEPD-0050-1

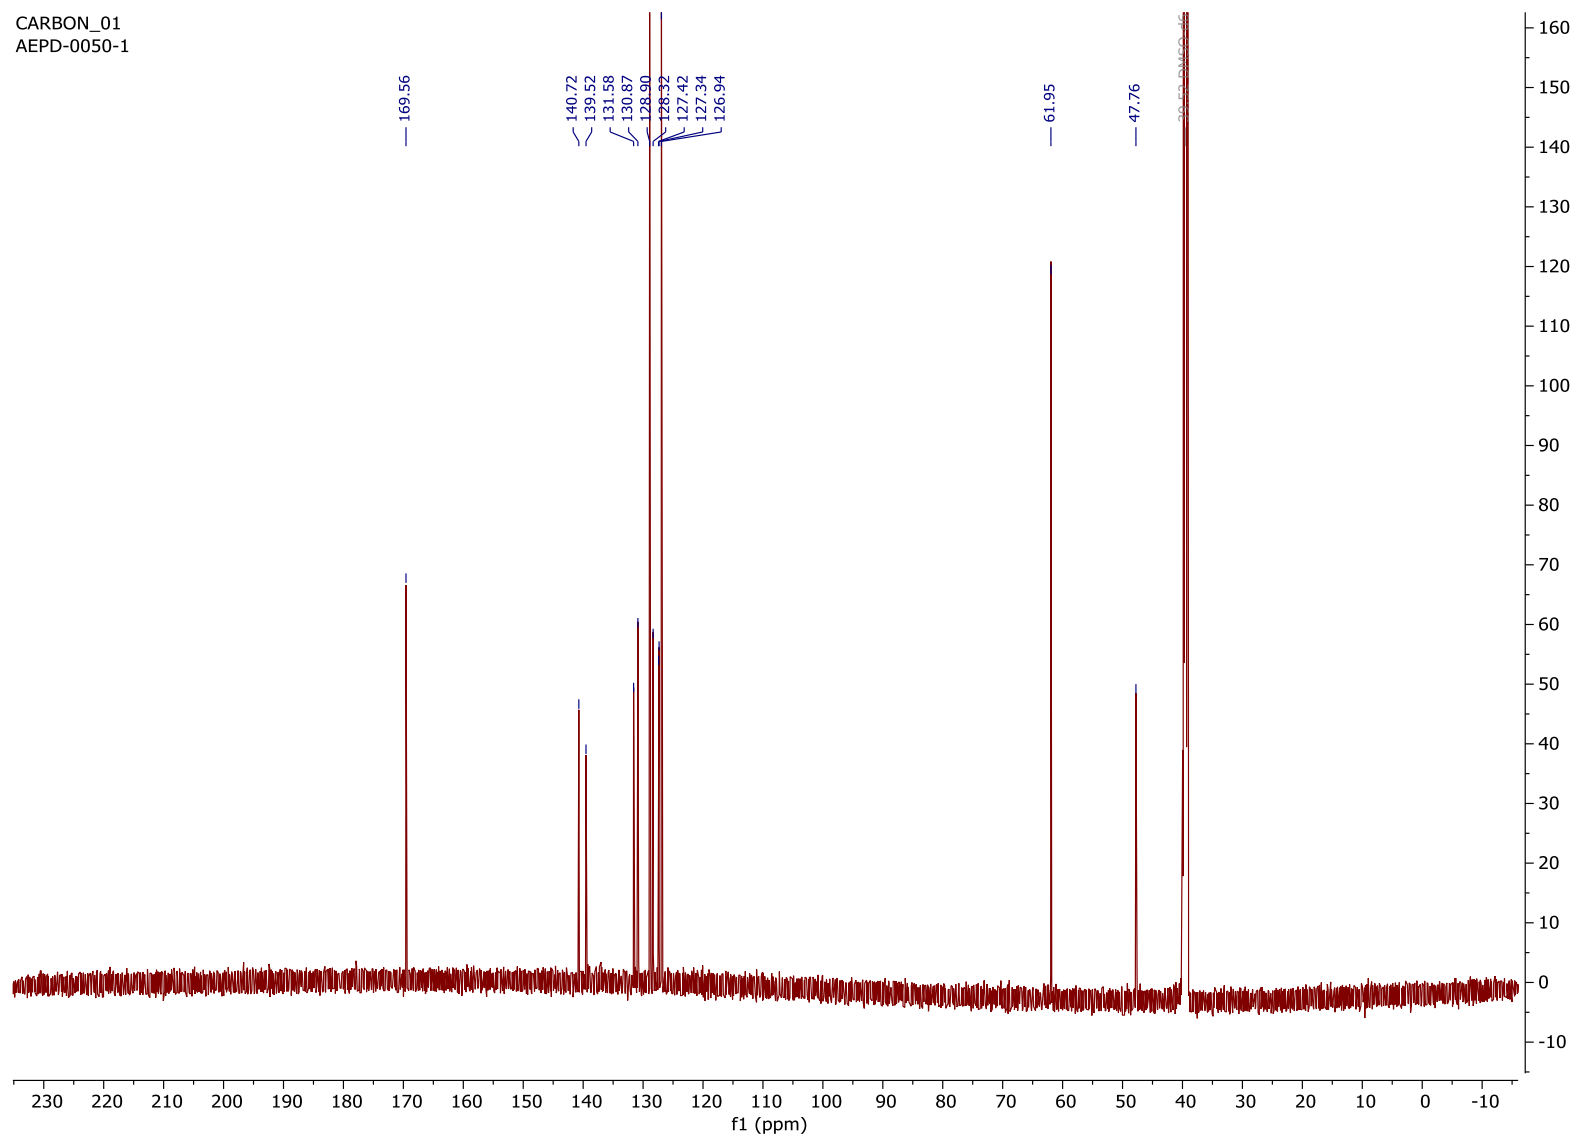

AEPD-0050  
A\_EDMONDS000100 121 (2.379)

1: TOF MS ES+  
1.04e4

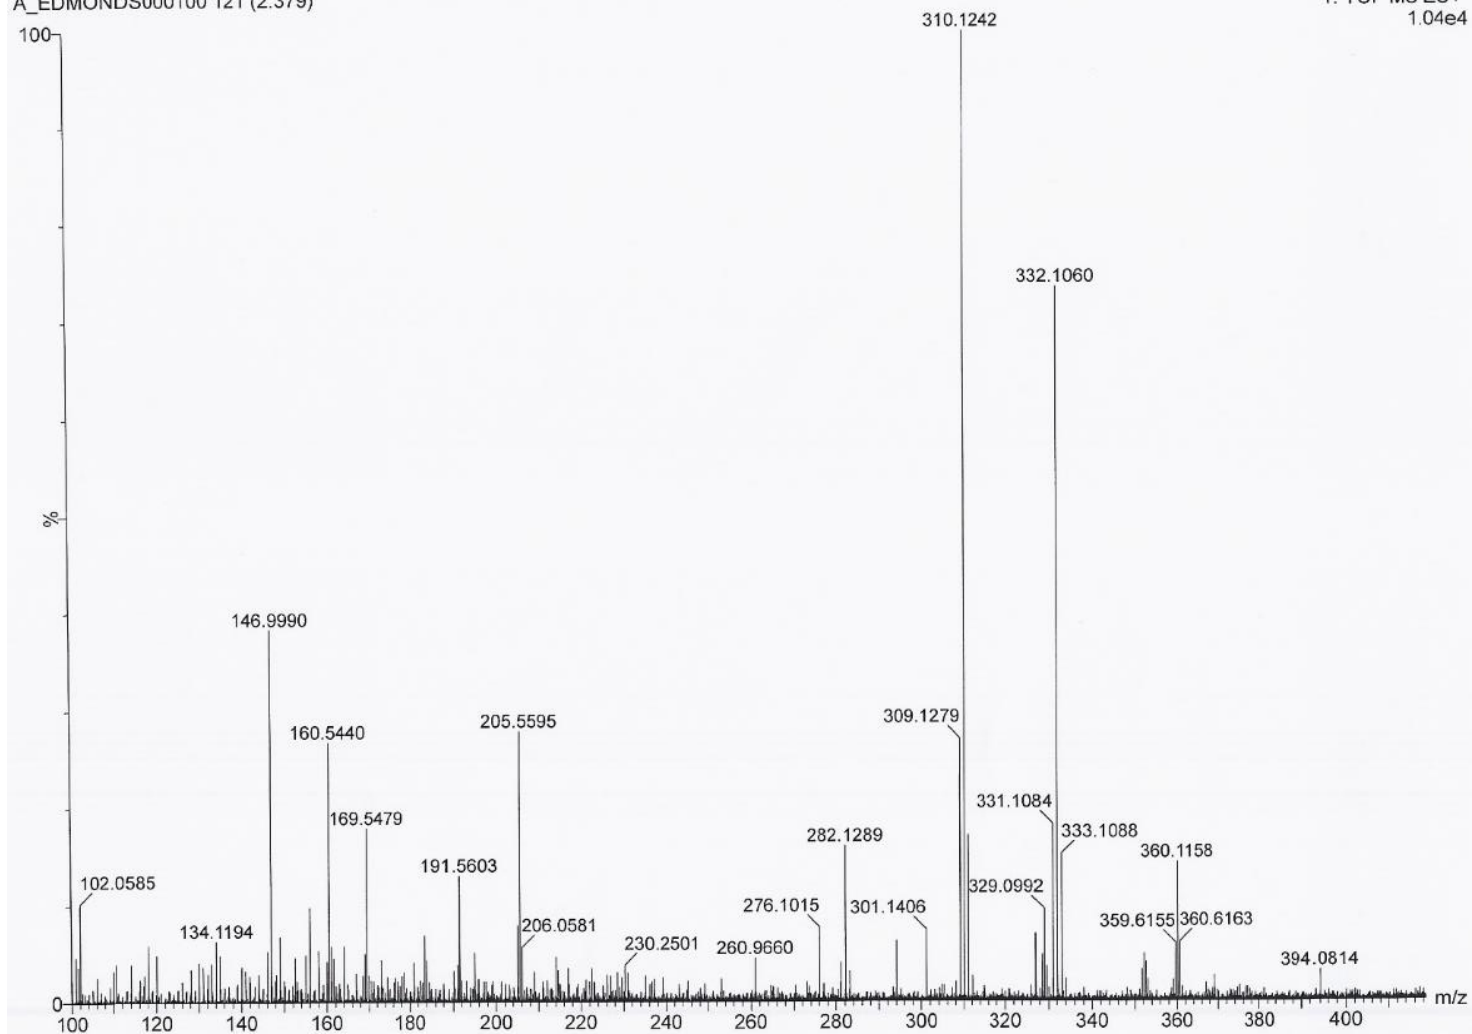

AEPD-0050

29Sep2021\_IG06

1: TOF MS ES+  
266.095 0.0500Da  
1.24e5

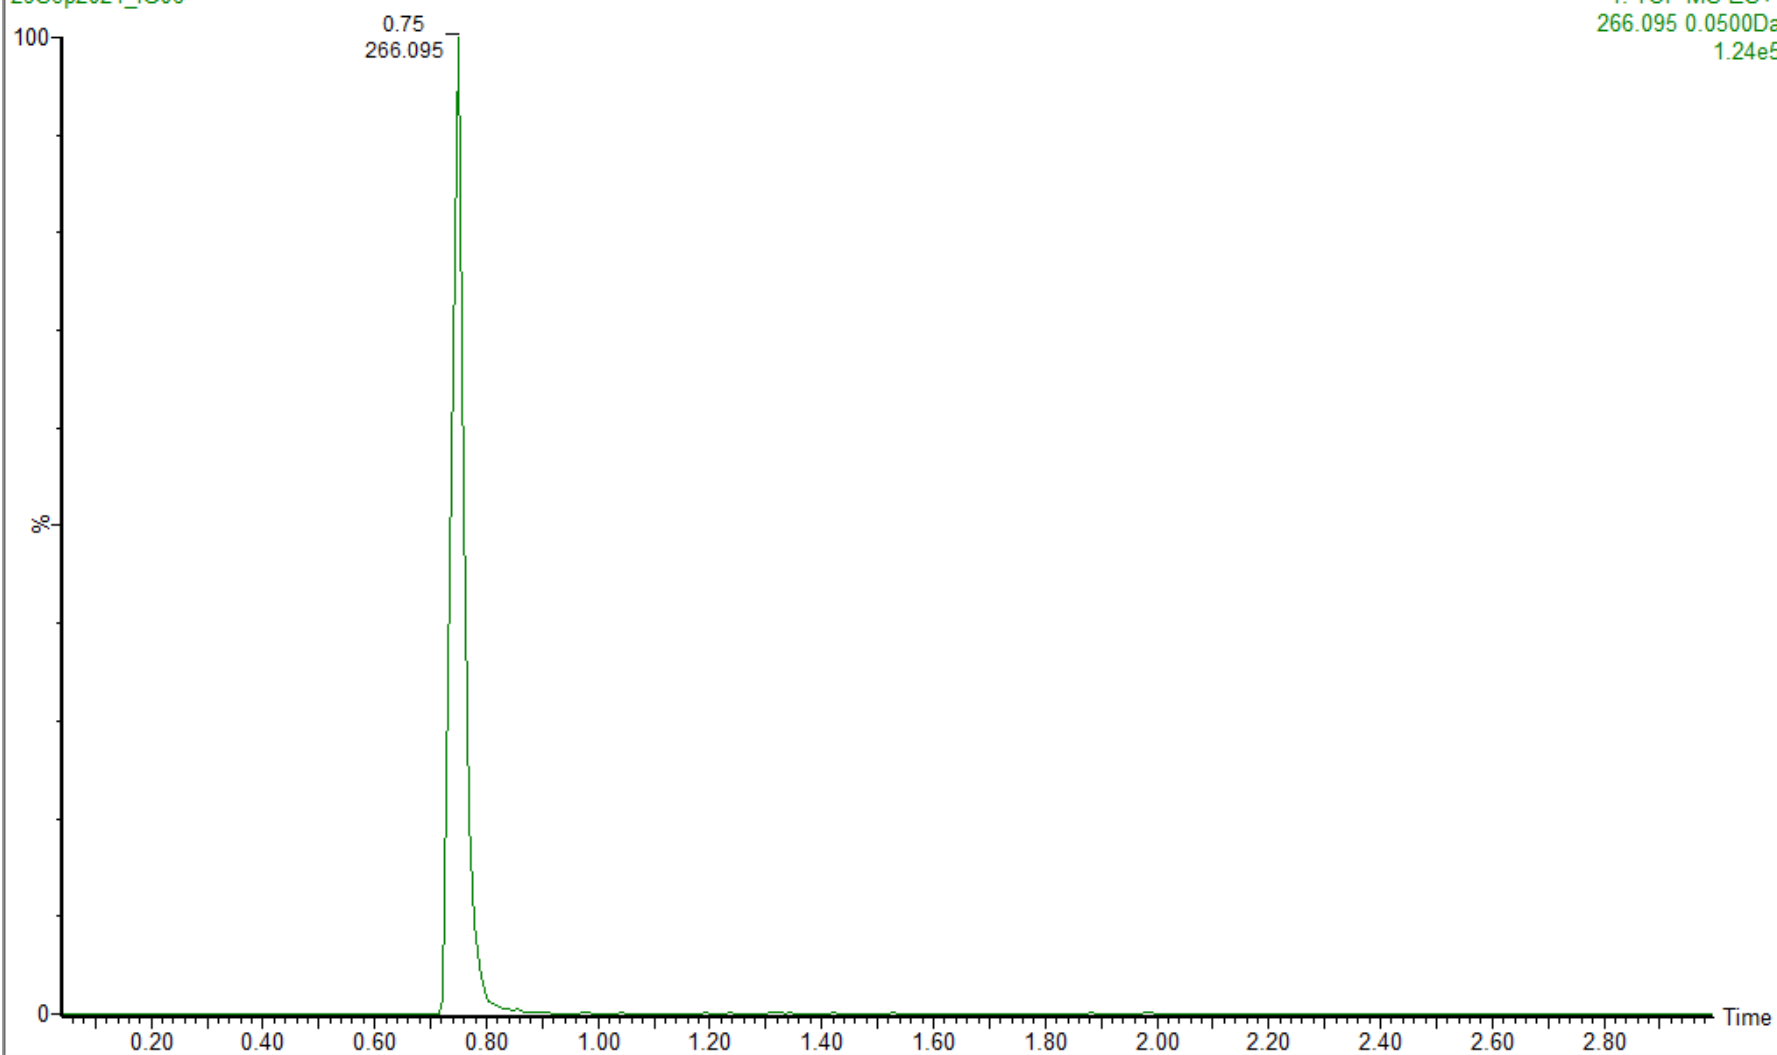

**2-(3,5-bis(Trifluoromethyl)phenyl)-6-methyl-1,3,6,2-dioxazaborocane-4,8-dione 8m**

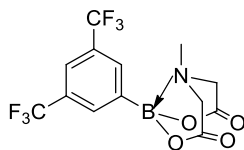

**8m**

2-(3,5-bis(trifluoromethyl)phenyl)-6-methyl-1,3,6,2-dioxazaborocane-4,8-dione

Chemical Formula:  $C_{13}H_{10}BF_6NO_4$

Molecular Weight: 369.0242

Yield = 311.6 mg (80%).

PROTON\_01  
AEPD-0059-2

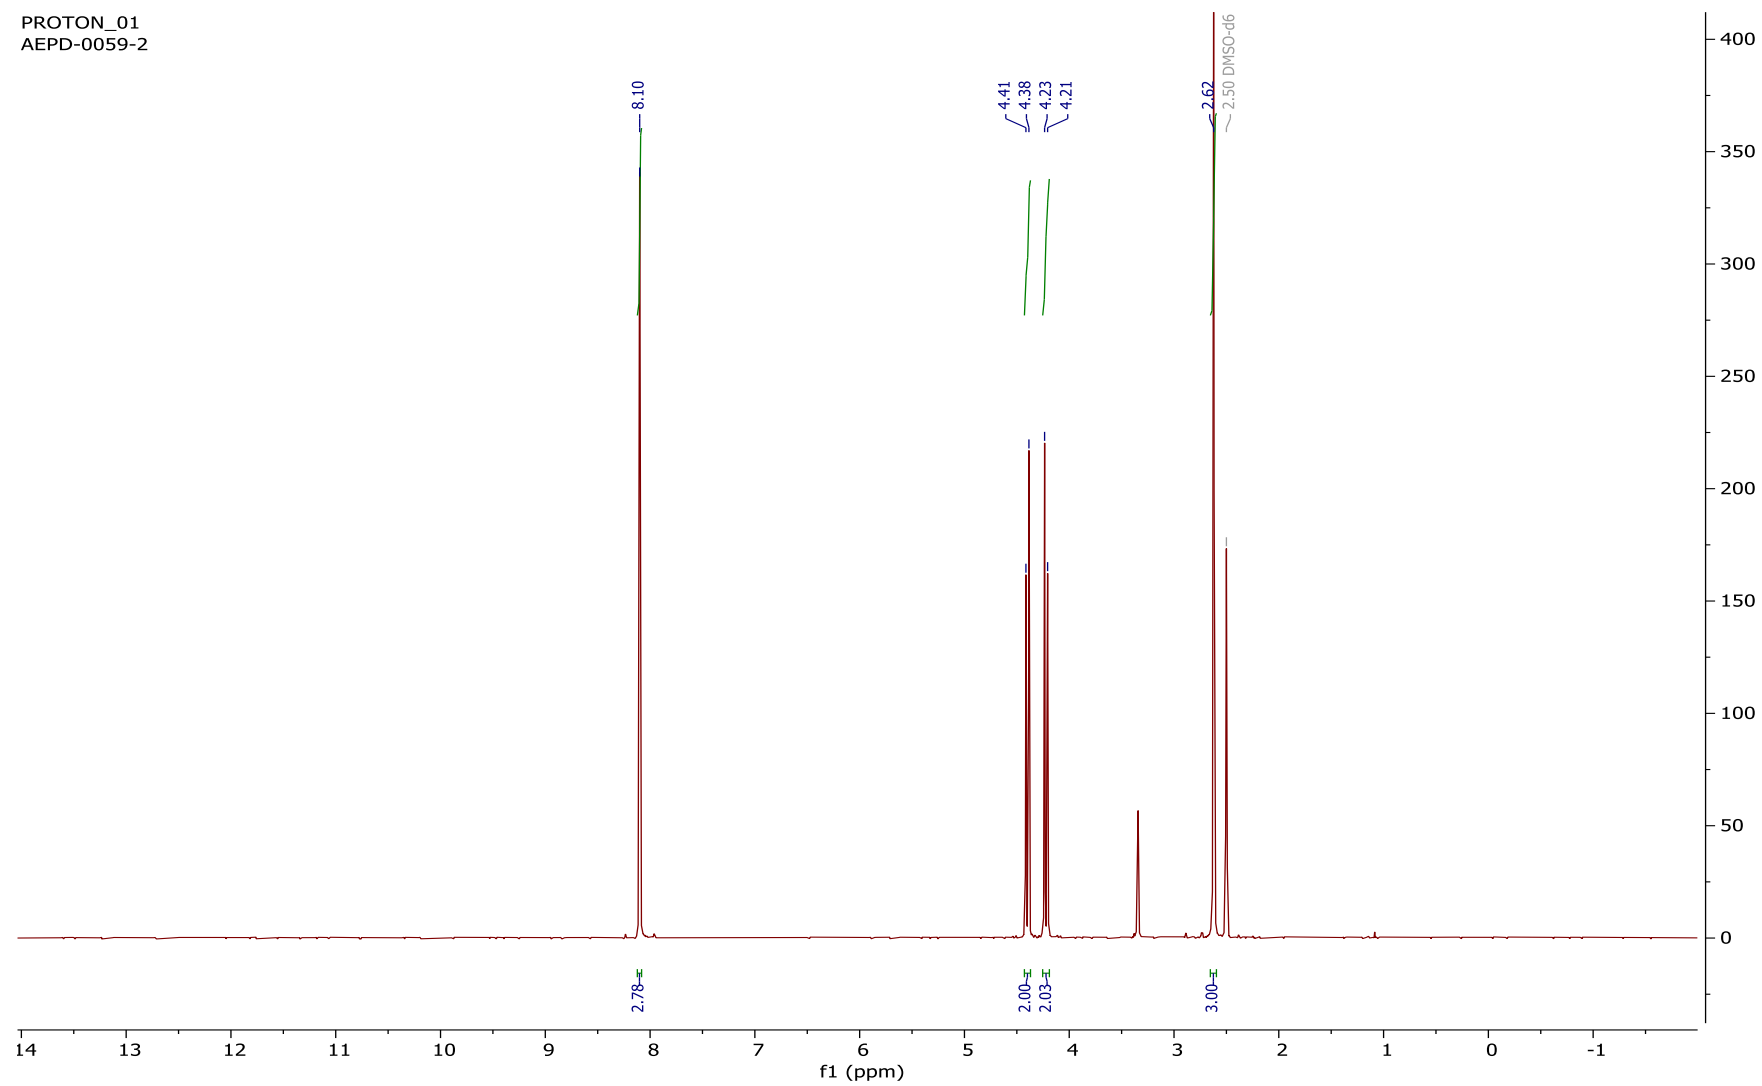

CARBON\_01  
AEPD-0059-2

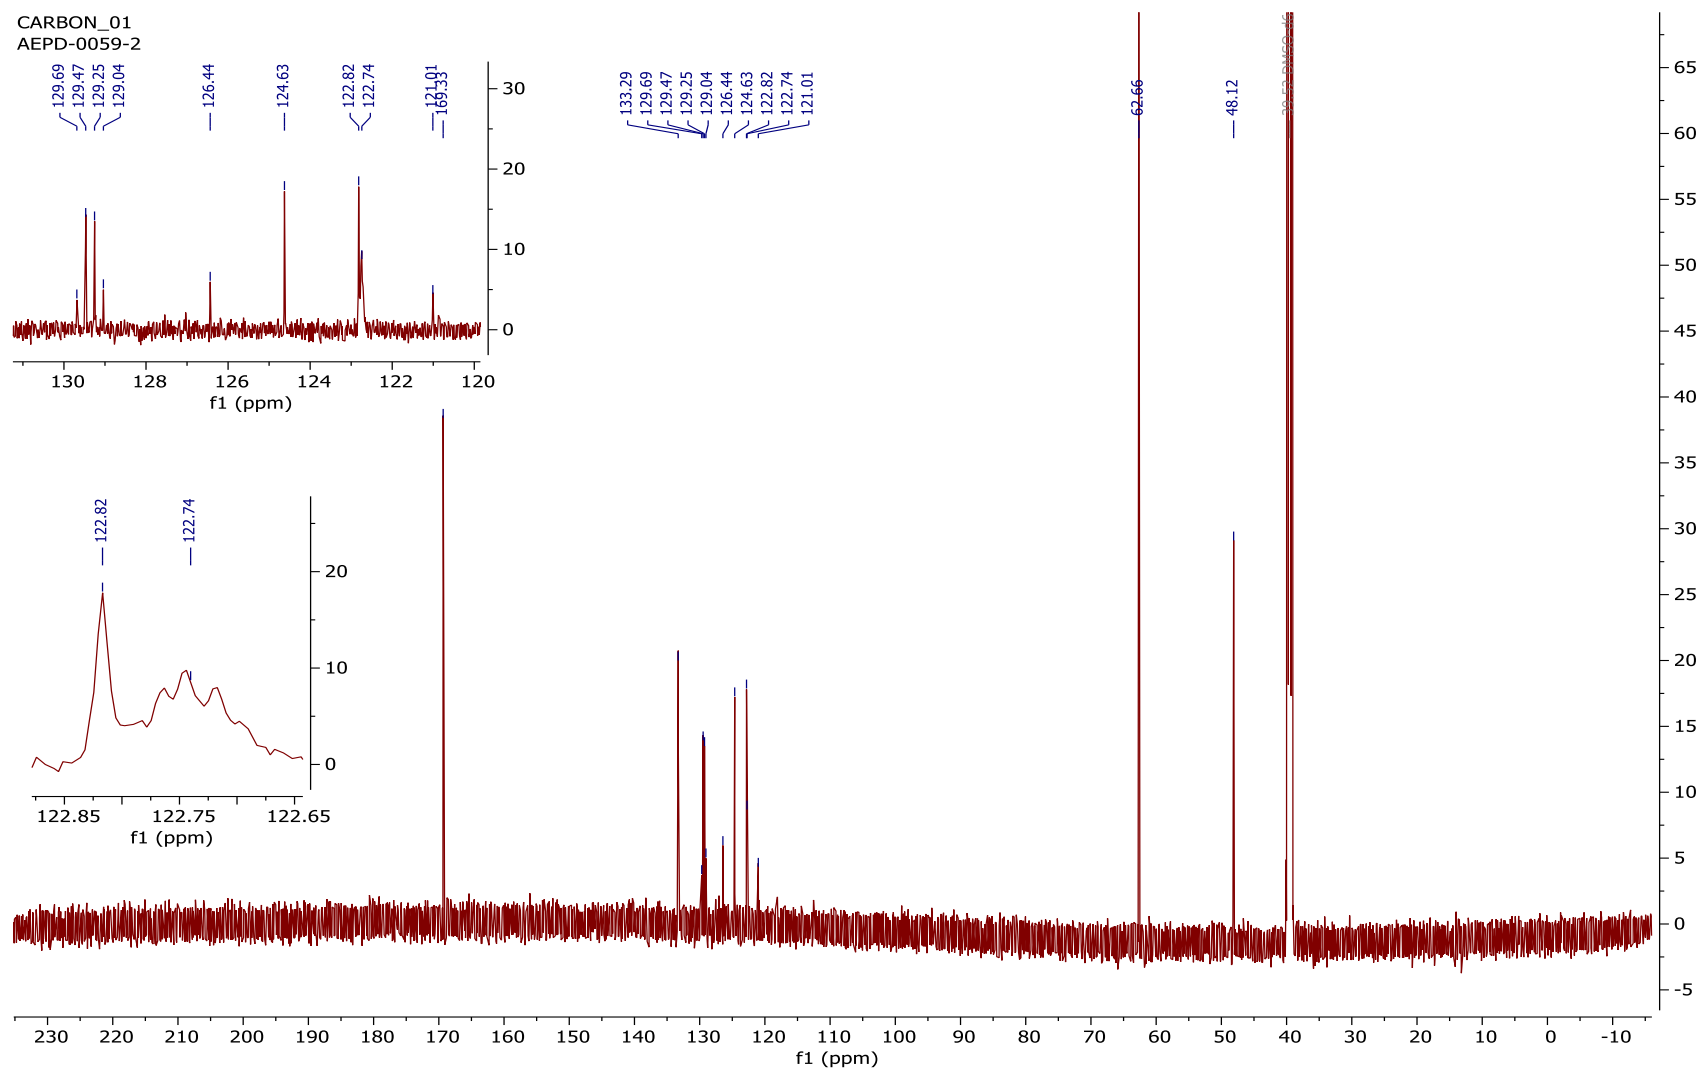

### Single Mass Analysis

Tolerance = 5.0 mDa / DBE: min = -1.5, max = 120.0

Element prediction: Off

Number of isotope peaks used for i-FIT = 3

Monoisotopic Mass, Even Electron Ions

200 formula(e) evaluated with 1 results within limits (up to 20 best isotopic matches for each mass)

Elements Used:

| Mass     | Calc. Mass | mDa  | PPM  | DBE | Formula             | i-FIT | i-FIT Norm | Fit Conf % | C  | H  | 11B | N | O | F |
|----------|------------|------|------|-----|---------------------|-------|------------|------------|----|----|-----|---|---|---|
| 370.0676 | 370.0685   | -0.9 | -2.4 | 6.5 | C13 H11 11B N O4 F6 | 19.6  | n/a        | n/a        | 13 | 11 | 1   | 1 | 4 | 6 |

AEPD-0059

30Sep2021\_IG08 133 (1.334) Cm (132:139-(11:122+163:291)x10.000)

1: TOF MS ES+  
8.95e+003

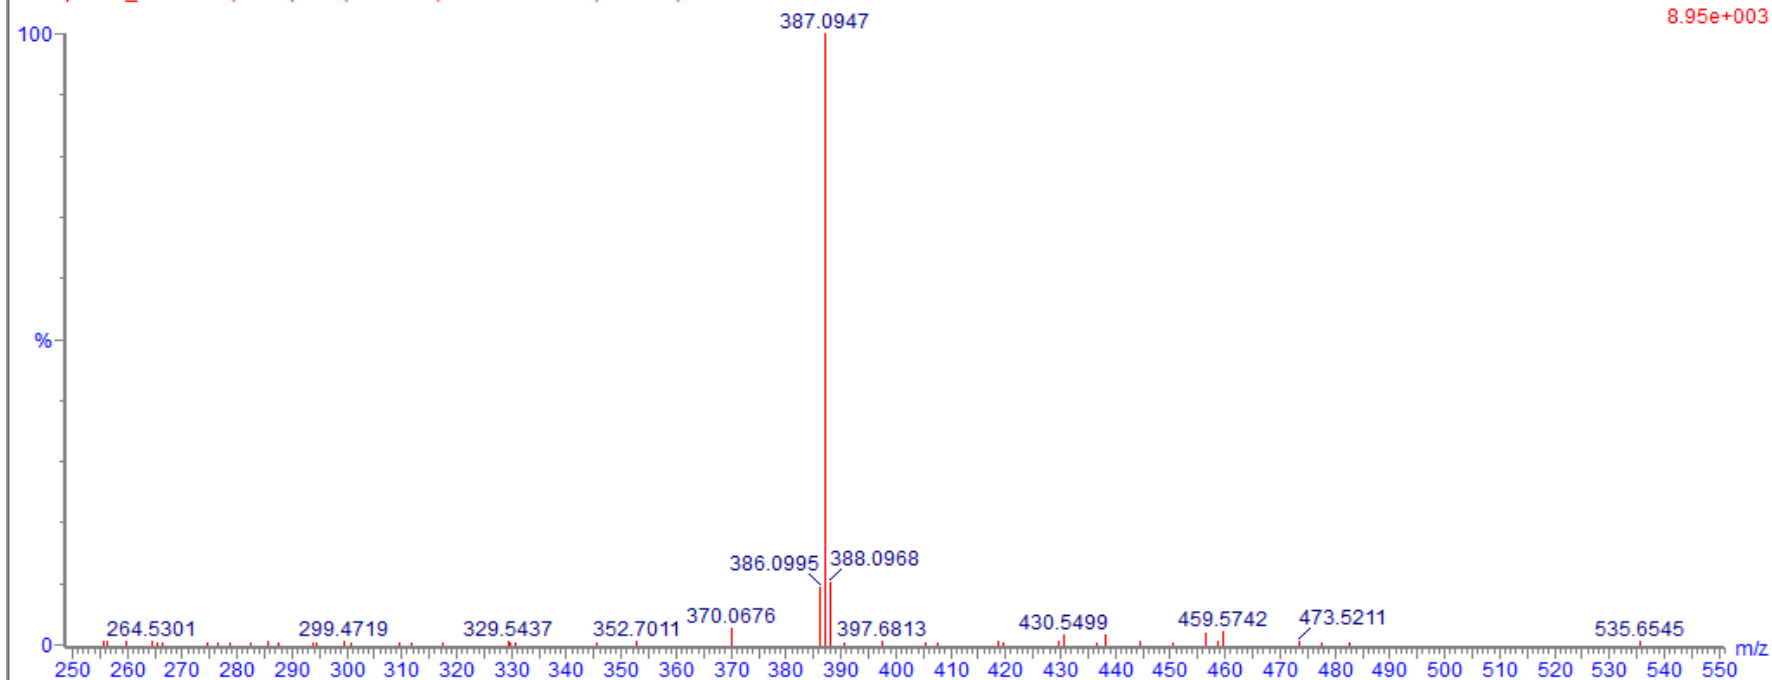



AEPD-0059

30Sep2021\_IG08

1: TOF MS ES+  
756.155 0.0500Da  
4.49e3

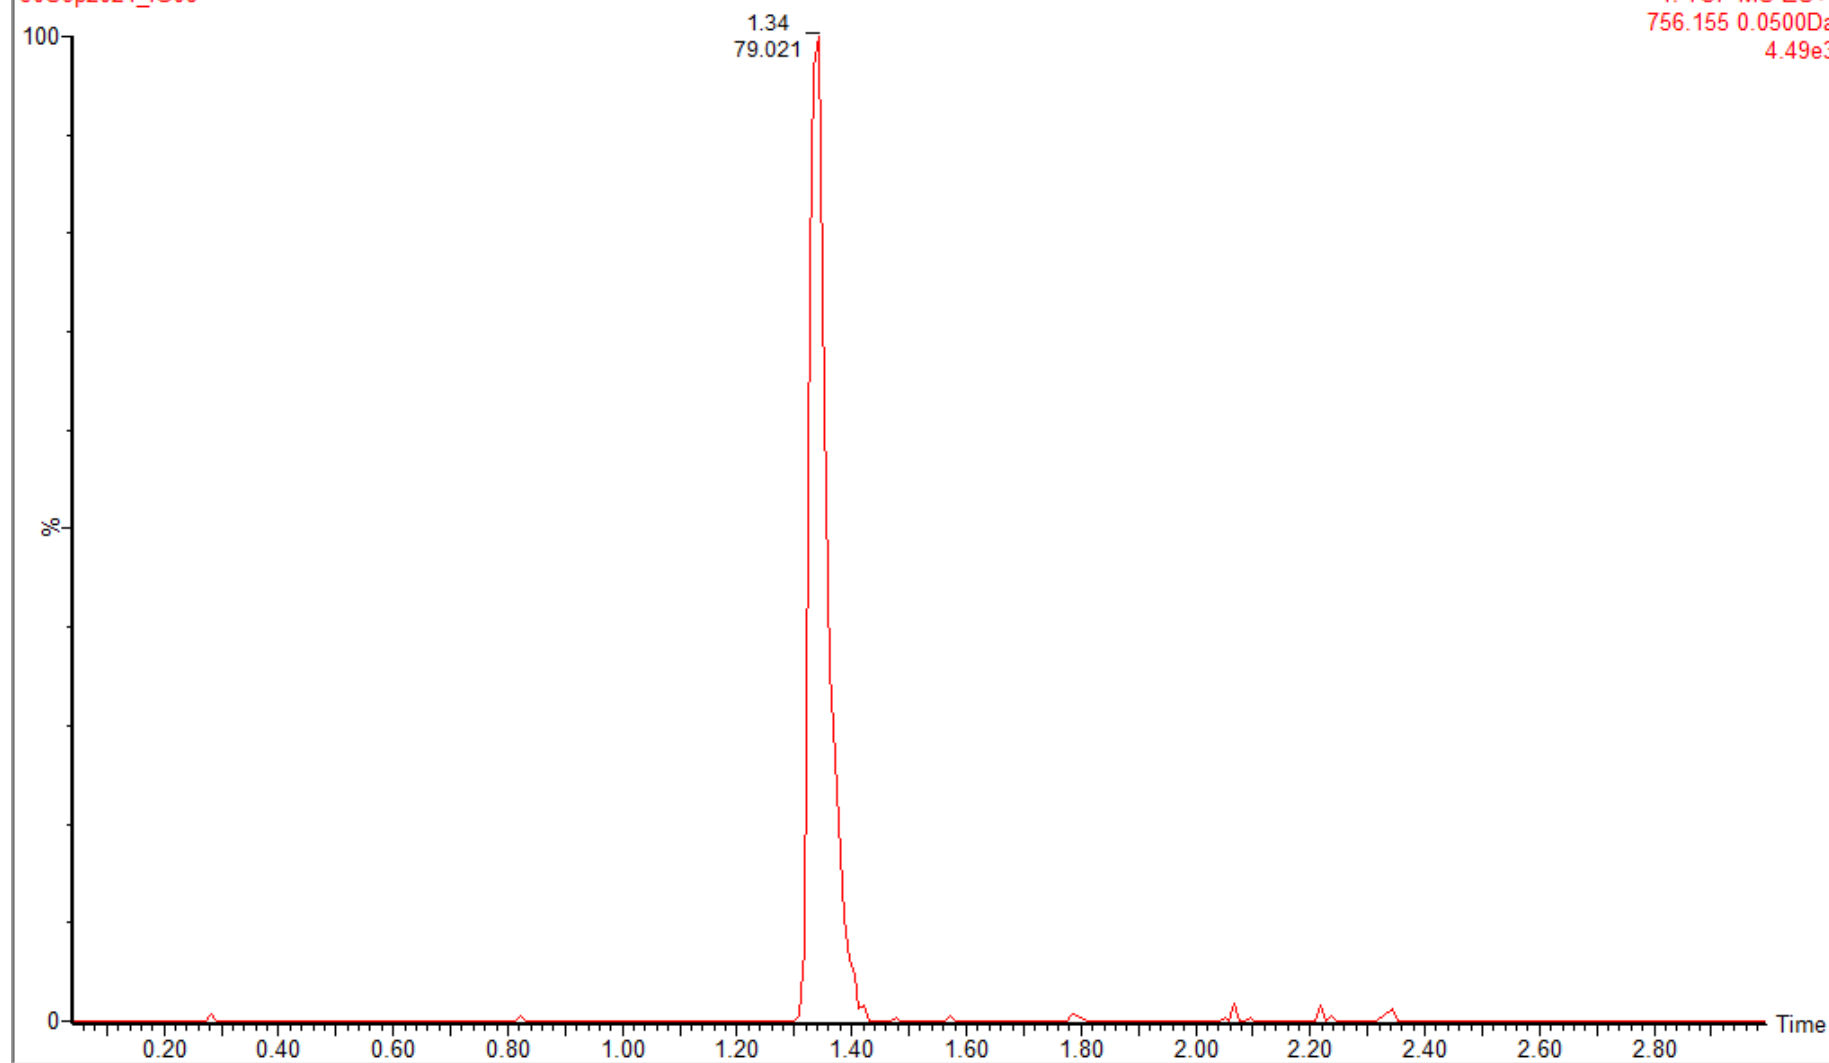

**6-Methyl-2-(4-(pyrrolidin-1-ylsulfonyl)phenyl)-1,3,6,2-dioxazaborocane-4,8-dione 8n**

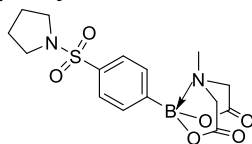

**8n**

6-methyl-2-(4-(pyrrolidin-1-ylsulfonyl)phenyl)-1,3,6,2-dioxazaborocane-4,8-dione

Chemical Formula:  $C_{15}H_{19}BN_2O_6S$

Molecular Weight: 366.1972

Yield = 326.3 mg (84%).

PROTON\_01  
AEPD-0060-2

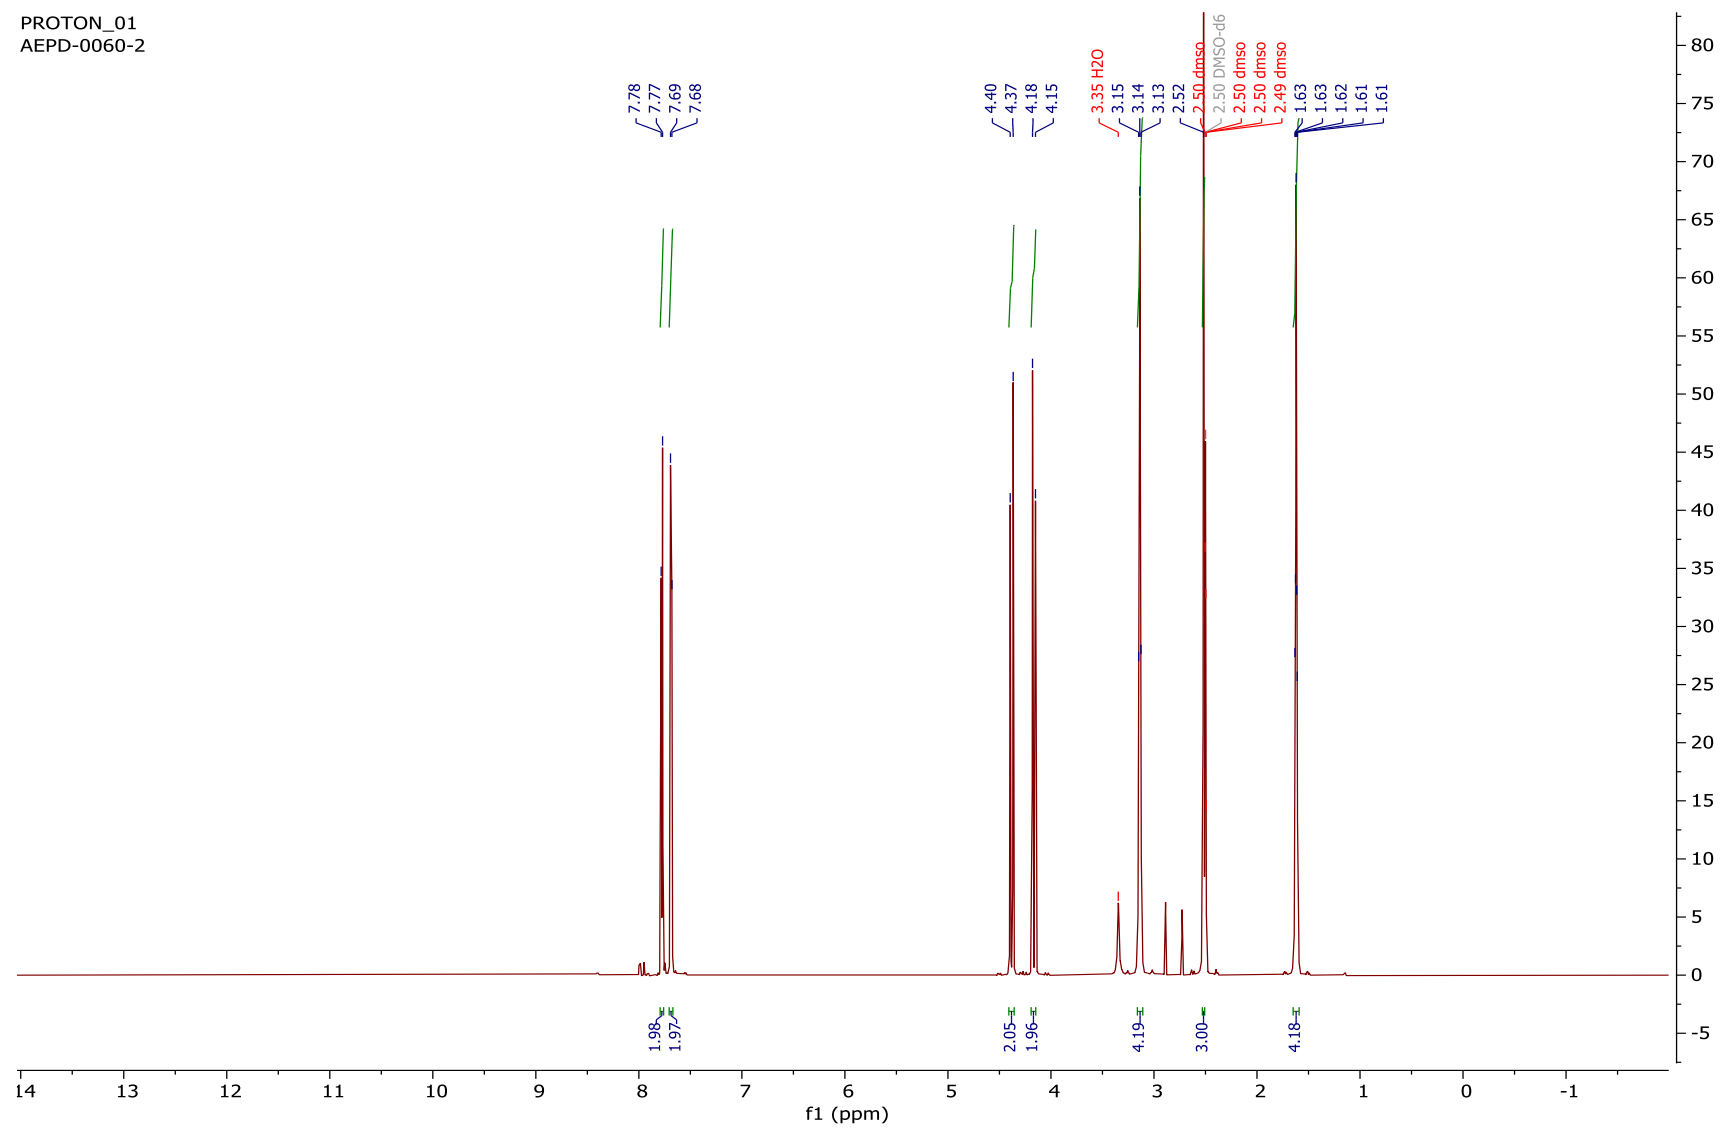

CARBON\_01  
AEPD-0060-1a

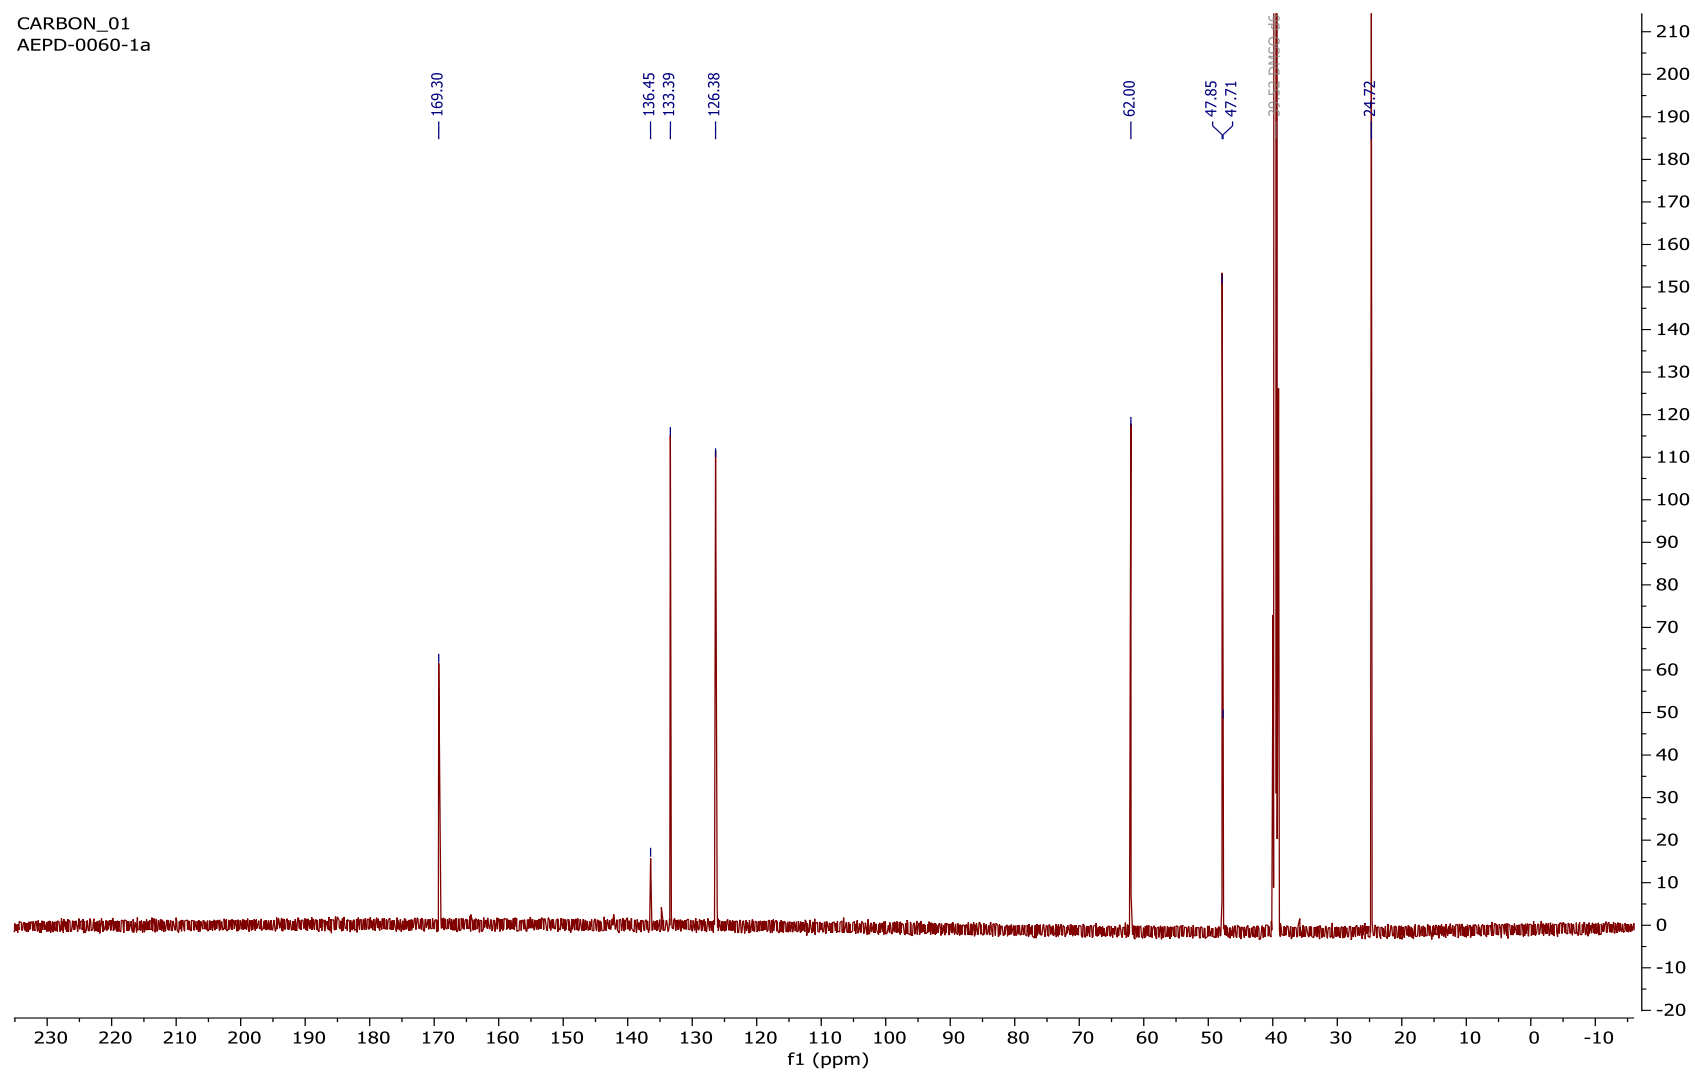

### Single Mass Analysis

Tolerance = 5.0 mDa / DBE: min = -1.5, max = 120.0

Element prediction: Off

Number of isotope peaks used for i-FIT = 3

Monoisotopic Mass, Even Electron Ions

81 formula(e) evaluated with 1 results within limits (up to 20 best isotopic matches for each mass)

Elements Used:

| Mass     | Calc. Mass | mDa  | PPM  | DBE | Formula             | i-FIT | i-FIT Norm | Fit Conf % | C  | H  | 11B | N | O | S |
|----------|------------|------|------|-----|---------------------|-------|------------|------------|----|----|-----|---|---|---|
| 367.1129 | 367.1135   | -0.6 | -1.6 | 7.5 | C15 H20 11B N2 O6 S | 239.2 | n/a        | n/a        | 15 | 20 | 1   | 2 | 6 | 1 |

AEPD-0060

29Sep2021\_JG12 107 (1.068) Cm (105:108)

1: TOF MS ES+  
3.32e+005

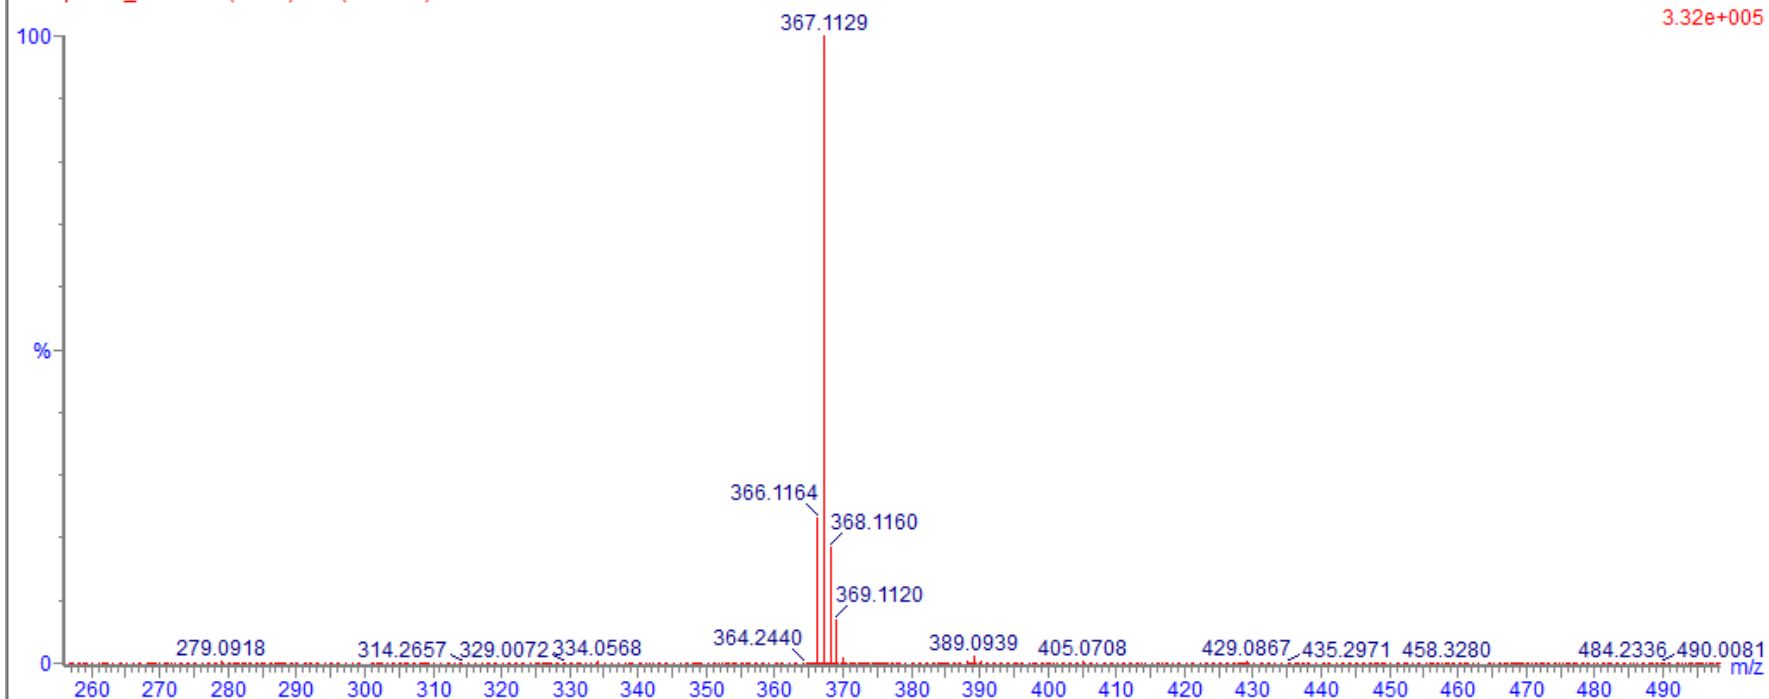

AEPD-0060

29Sep2021\_IG12

1: TOF MS ES+  
367.113 0.0500Da  
1.21e5

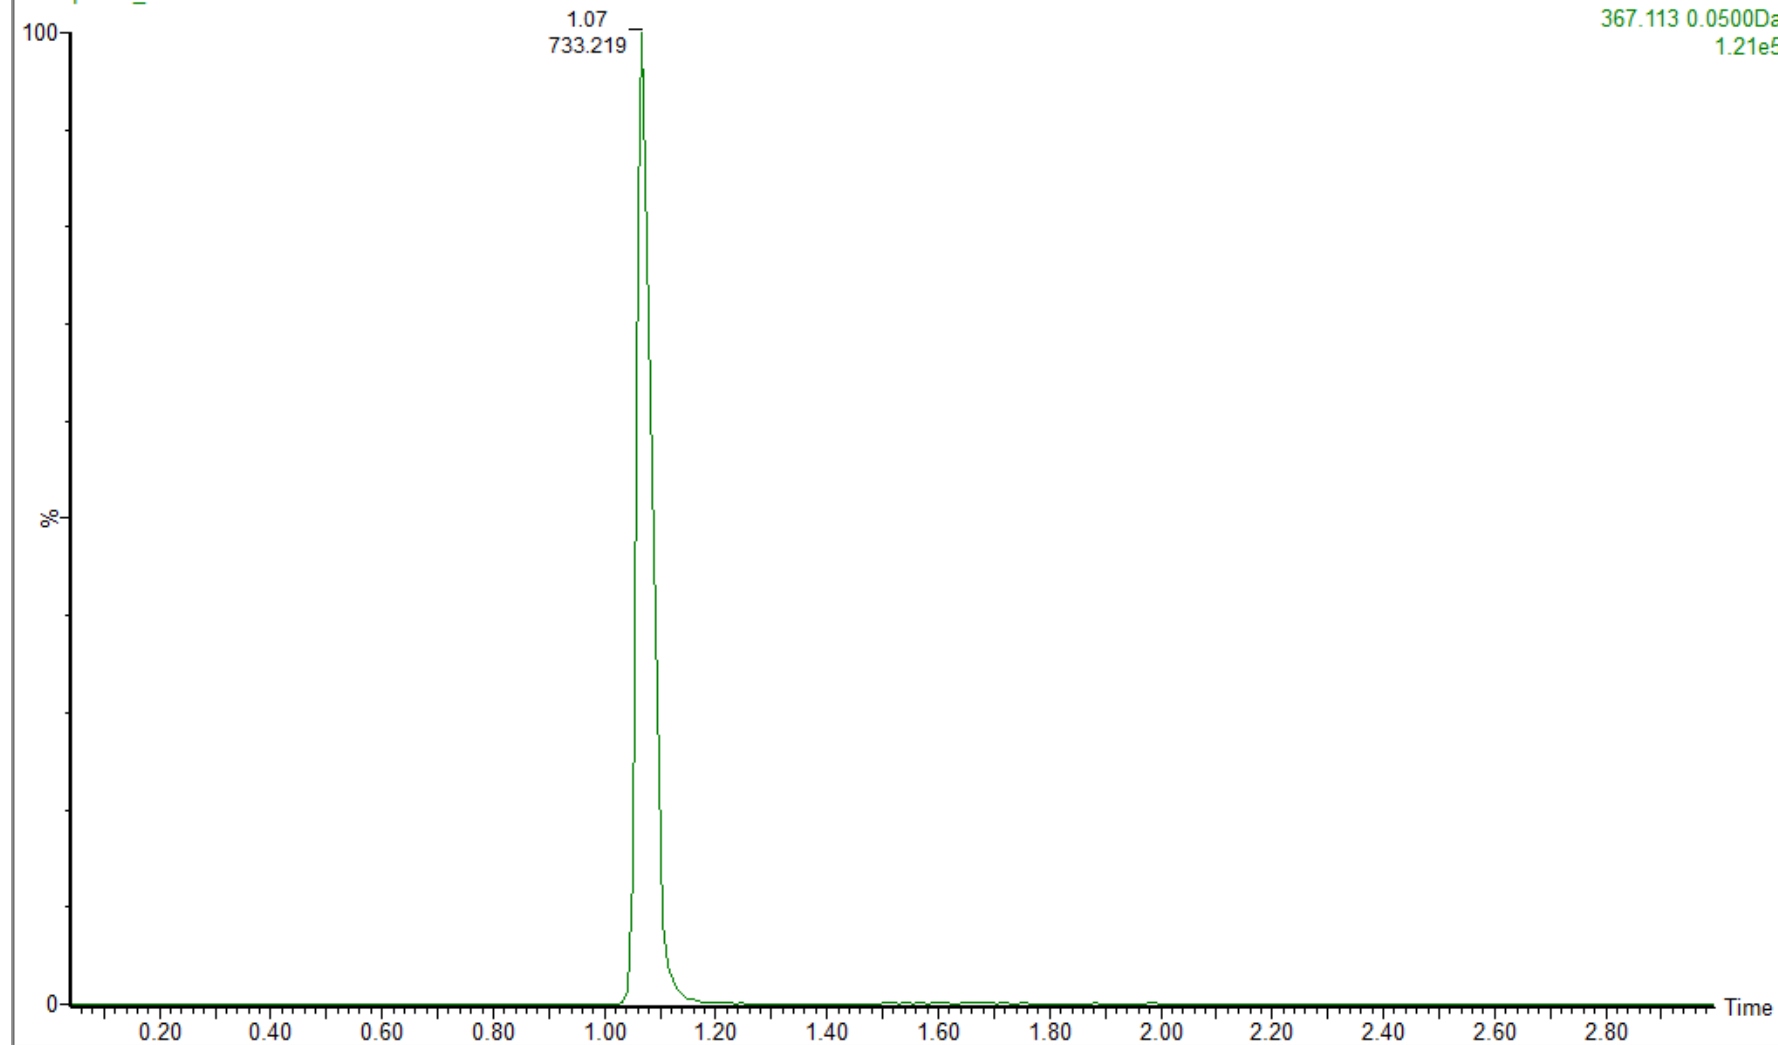

**2-(3-(tert-Butyl)phenyl)-6-methyl-1,3,6,2-dioxazaborocane-4,8-dione 8o**

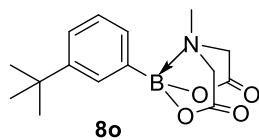

2-(3-(*tert*-butyl)phenyl)-6-methyl-1,3,6,2-dioxazaborocane-4,8-dione

Chemical Formula: C<sub>15</sub>H<sub>20</sub>BNO<sub>4</sub>

Molecular Weight: 289.1346

Yield = 230.0 mg (75%).

PROTON\_01  
AEPD-0067-1  
tBu

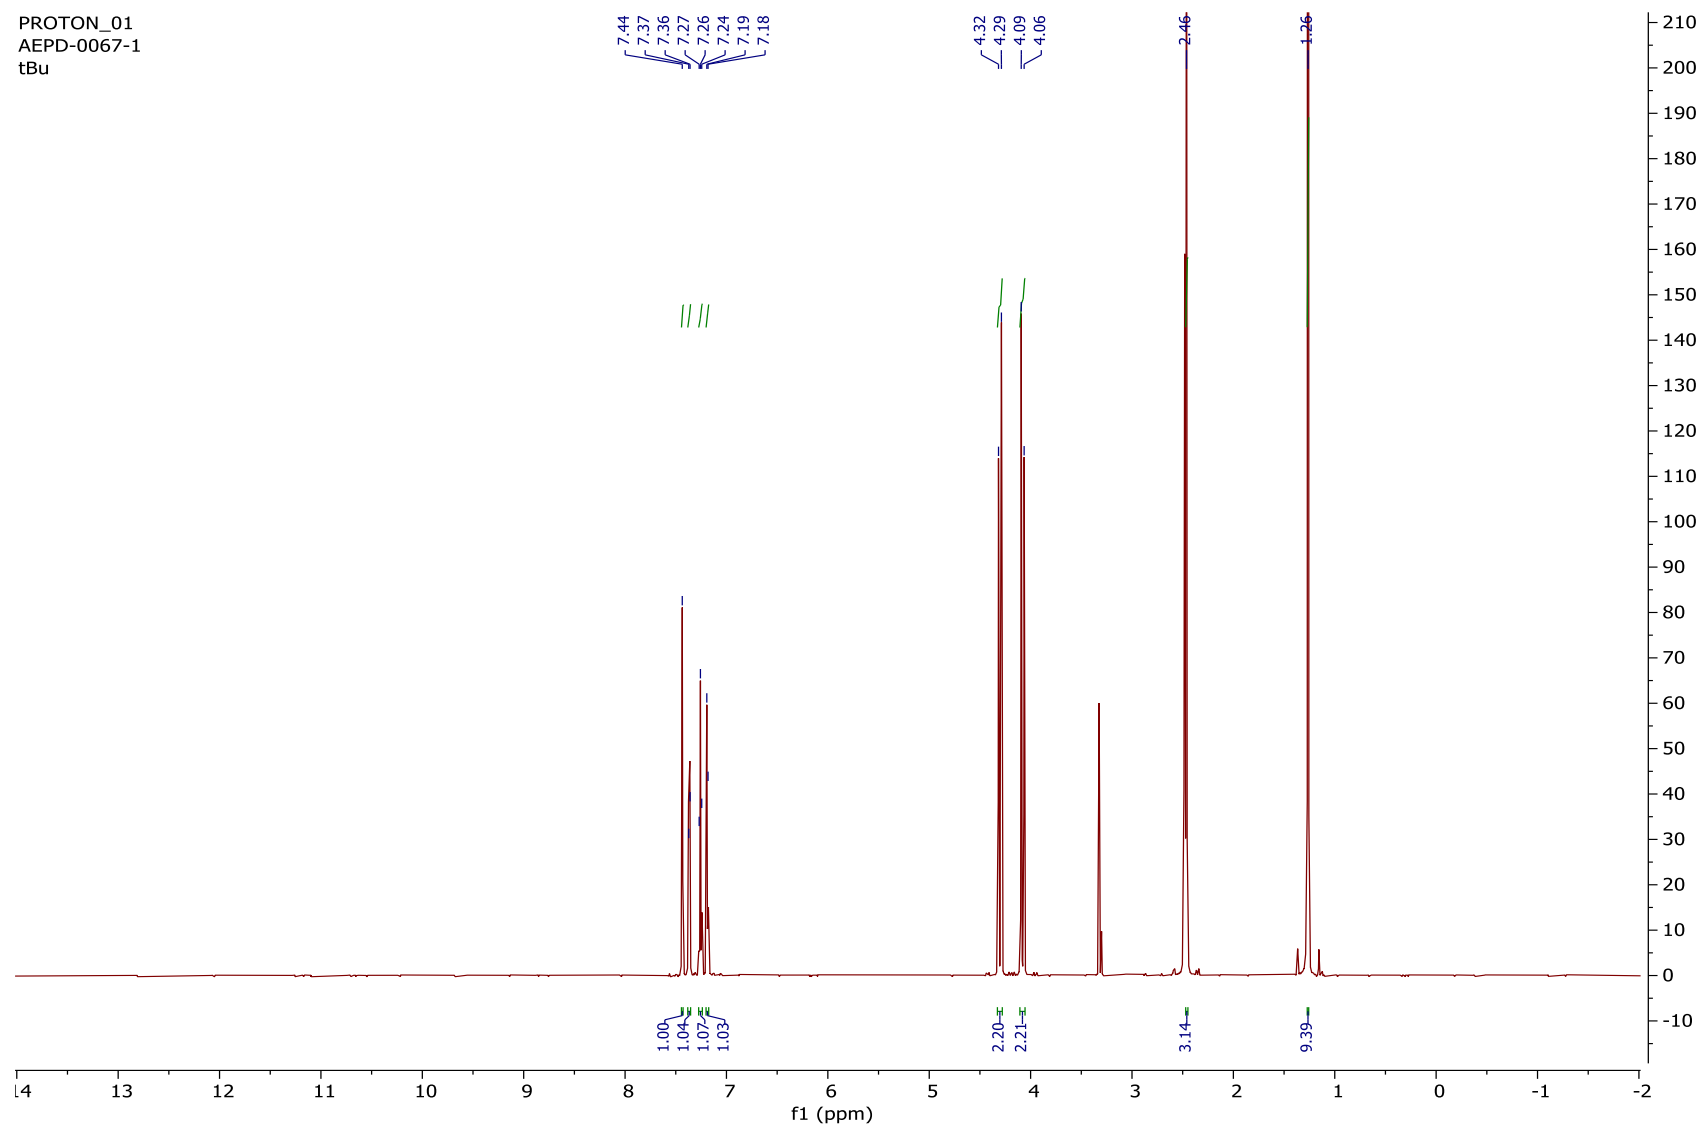



CARBON\_01  
AEPD-0067-1  
tBu

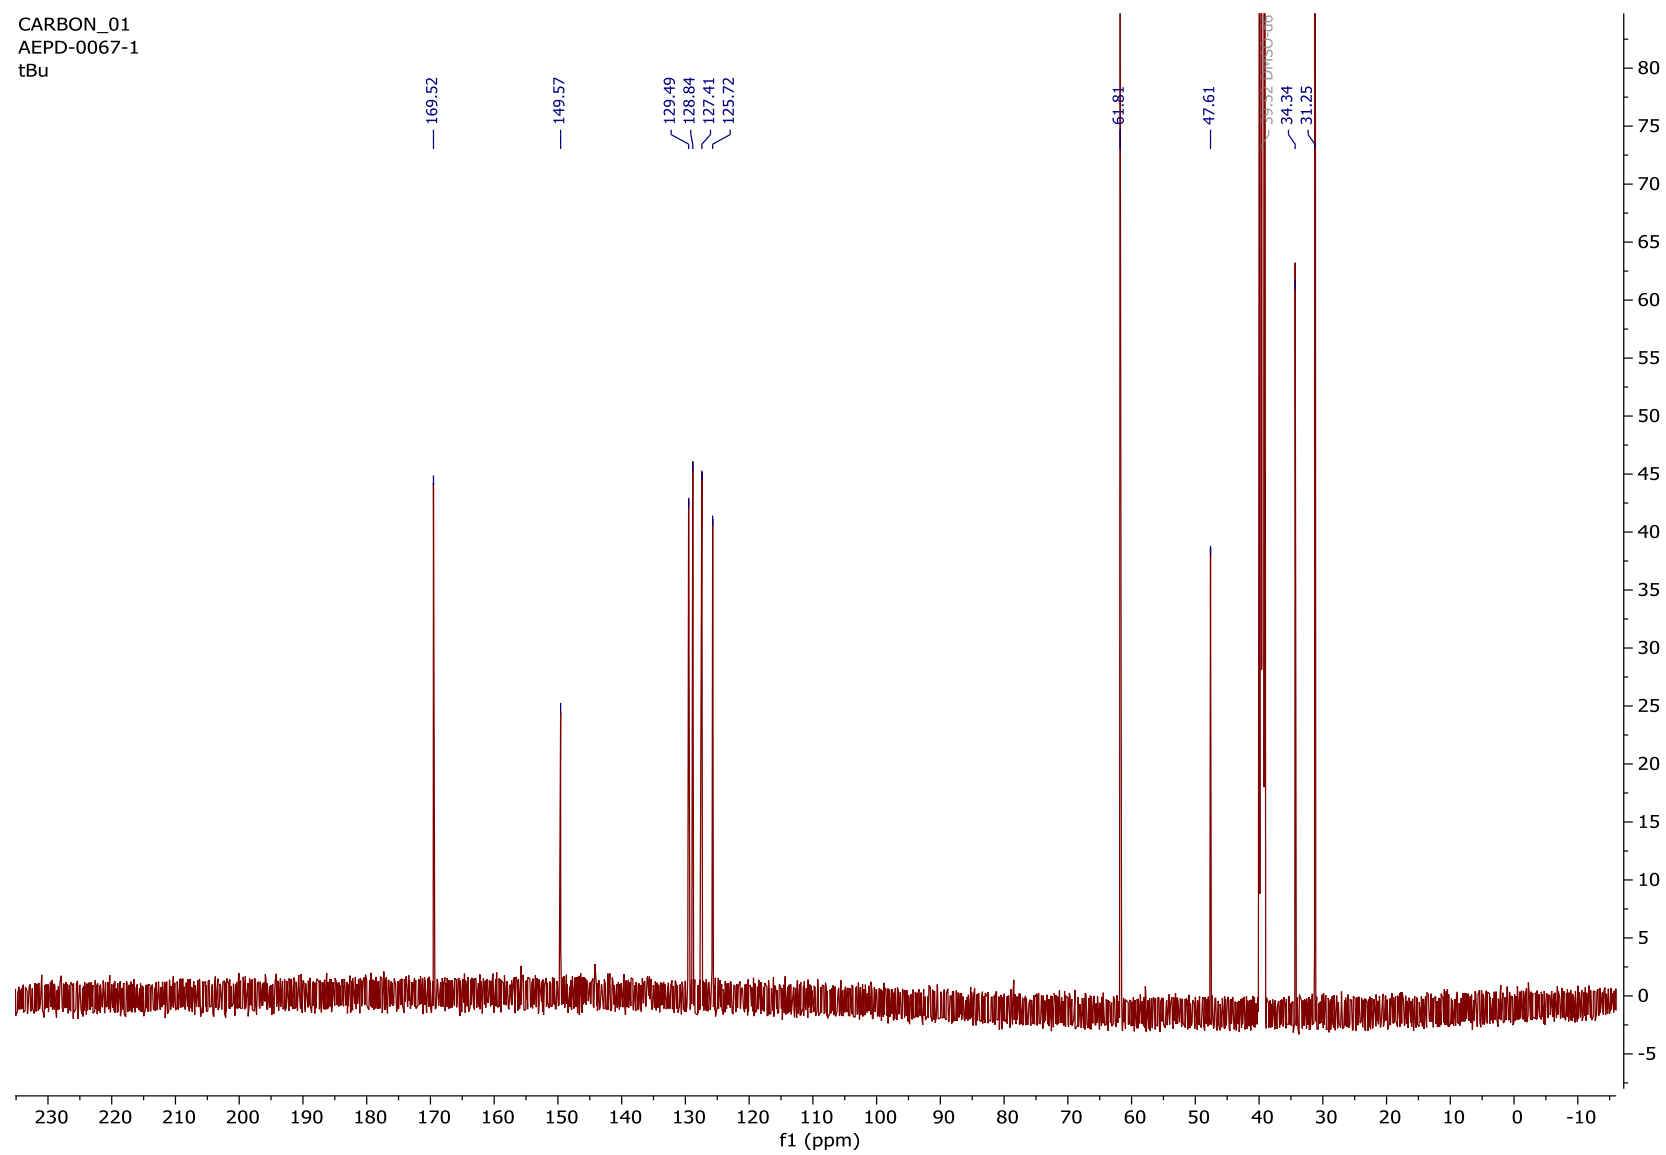

### Single Mass Analysis

Tolerance = 5.0 mDa / DBE: min = -1.5, max = 120.0

Element prediction: Off

Number of isotope peaks used for i-FIT = 3

Monoisotopic Mass, Odd and Even Electron Ions

47 formula(e) evaluated with 1 results within limits (up to 20 best isotopic matches for each mass)

Elements Used:

| Mass     | Calc. Mass | mDa | PPM | DBE | Formula           | i-FIT | i-FIT Norm | Fit Conf % | C  | H  | 11B | N | O |
|----------|------------|-----|-----|-----|-------------------|-------|------------|------------|----|----|-----|---|---|
| 307.1837 | 307.1829   | 0.8 | 2.6 | 5.5 | C15 H24 11B N2 O4 | 243.6 | n/a        | n/a        | 15 | 24 | 1   | 2 | 4 |

AEPD-0067

29Sep2021\_IG14 129 (1.299) Cm (127:131)

1: TOF MS ES+  
2.24e+005

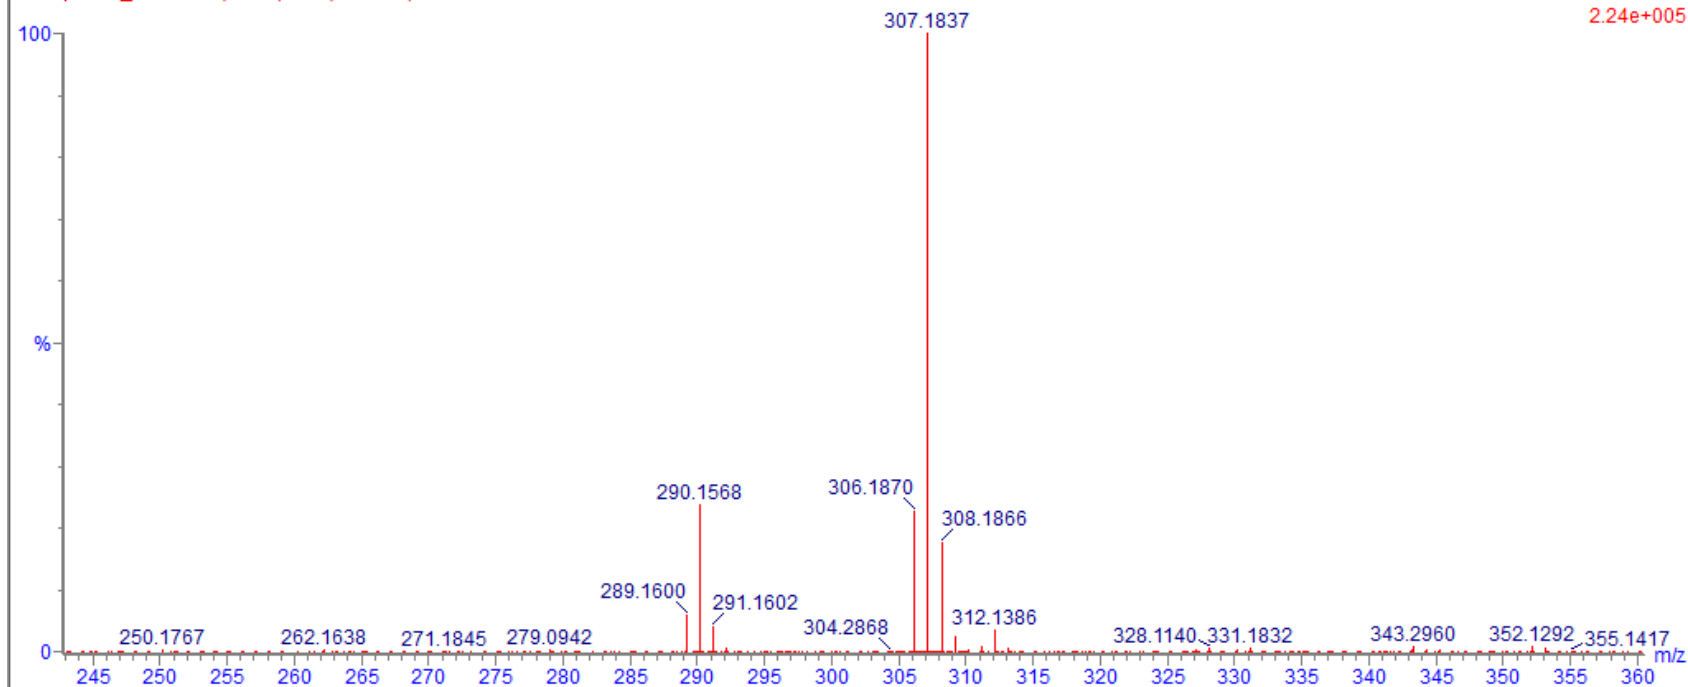

AEPD-0067

29Sep2021\_IG14

1: TOF MS ES+  
290.157 0.0500Da  
1.91e4

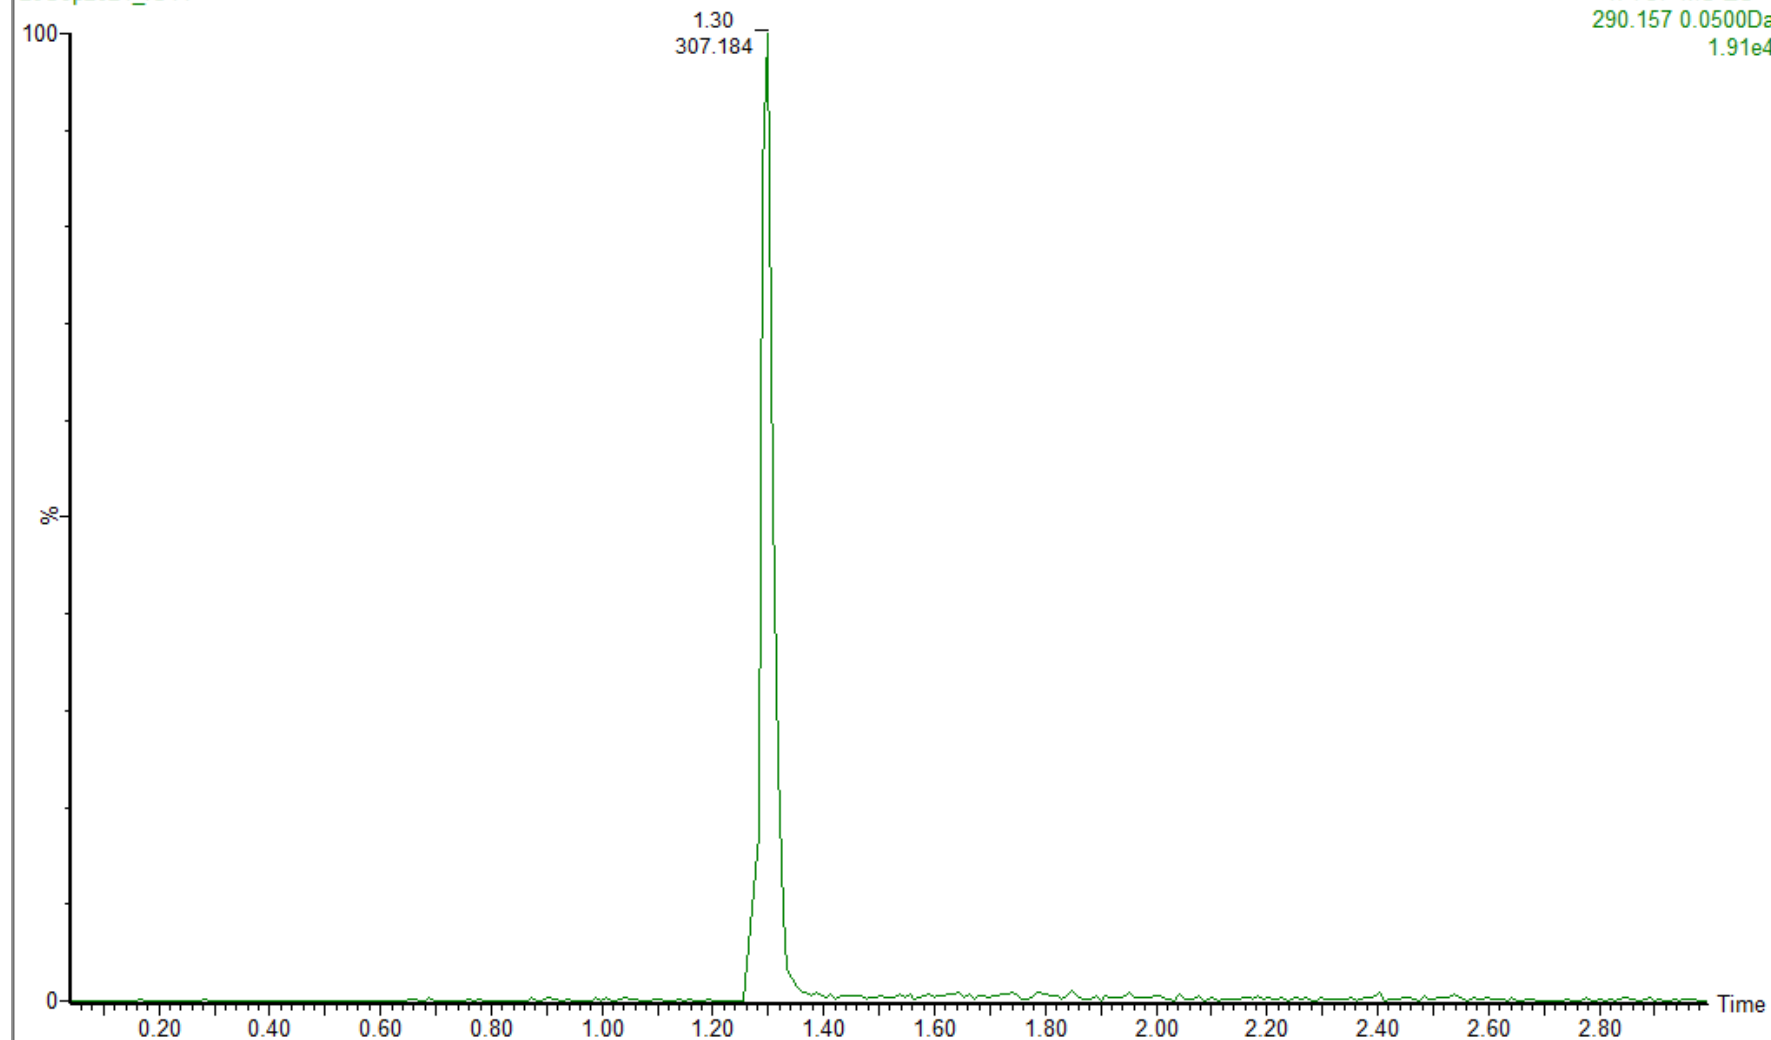

**2-(3-(2-Methoxyethoxy)phenyl)-6-methyl-1,3,6,2-dioxazaborocane-4,8-dione 8p**

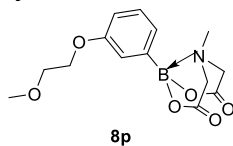

**8p**

2-(3-(2-methoxyethoxy)phenyl)-6-methyl-1,3,6,2-dioxazaborocane-4,8-dione

Chemical Formula:  $C_{14}H_{18}BNO_6$

Molecular Weight: 307.1068

Yield = 199.2 mg (61%).

PROTON\_01  
AEPD-0068-1

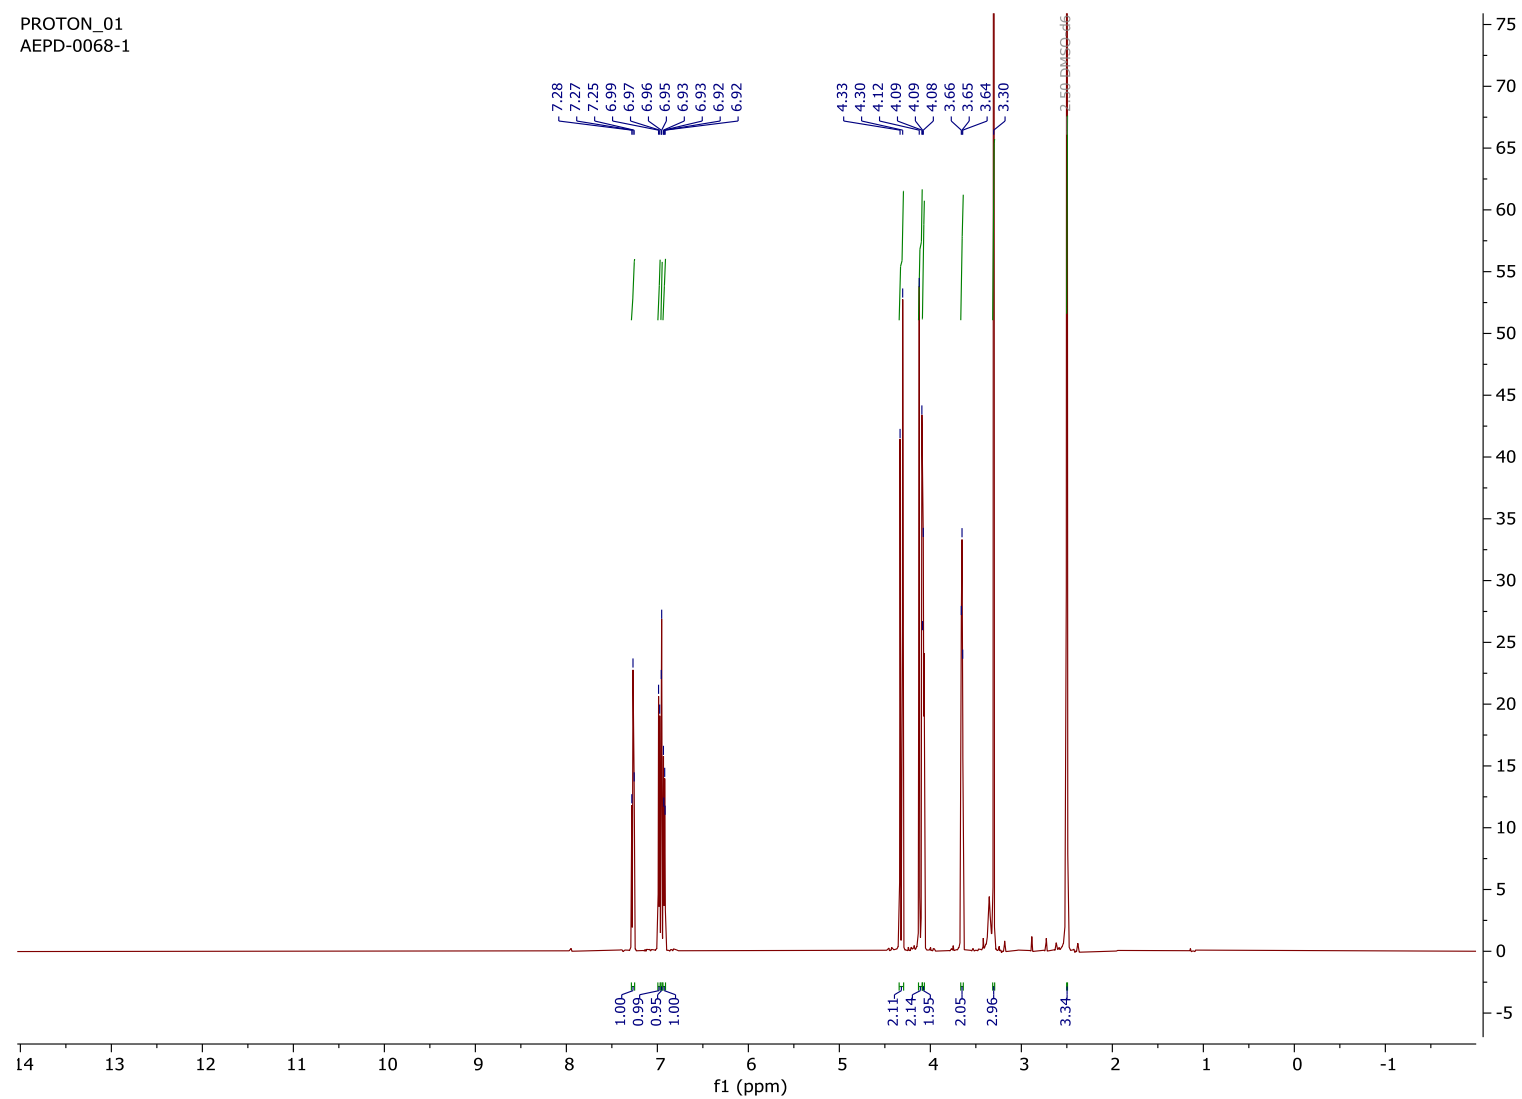

CARBON\_01  
AEPD-0068-1a

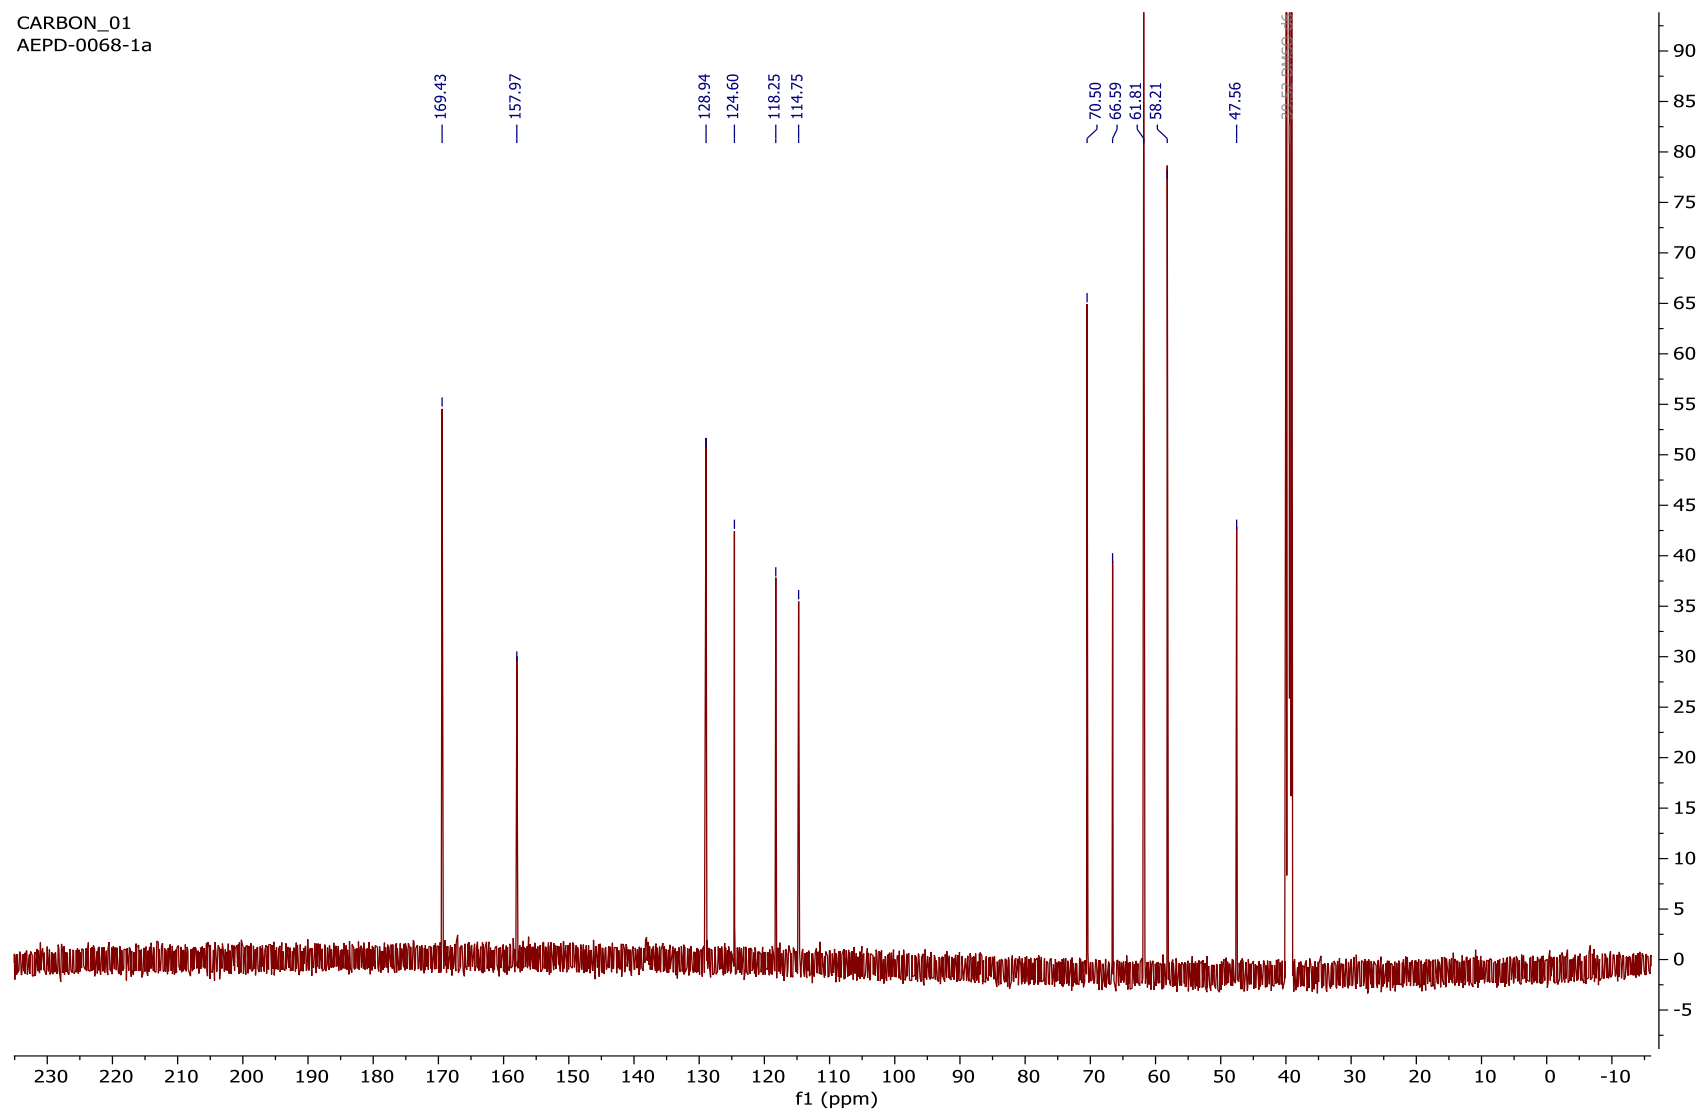

### Single Mass Analysis

Tolerance = 5.0 mDa / DBE: min = -1.5, max = 120.0

Element prediction: Off

Number of isotope peaks used for i-FIT = 3

Monoisotopic Mass, Even Electron Ions

63 formula(e) evaluated with 1 results within limits (up to 20 best isotopic matches for each mass)

Elements Used:

| Mass     | Calc. Mass | mDa | PPM | DBE | Formula          | i-FIT | i-FIT Norm | Fit Conf % | C  | H  | 11B | N | O |
|----------|------------|-----|-----|-----|------------------|-------|------------|------------|----|----|-----|---|---|
| 308.1305 | 308.1305   | 0.0 | 0.0 | 6.5 | C14 H19 11B N O6 | 302.1 | n/a        | n/a        | 14 | 19 | 1   | 1 | 6 |

AEPD-0068

29Sep2021\_IG16 100 (1.007) Cm (98:103)

1: TOF MS ES+  
6.25e+004

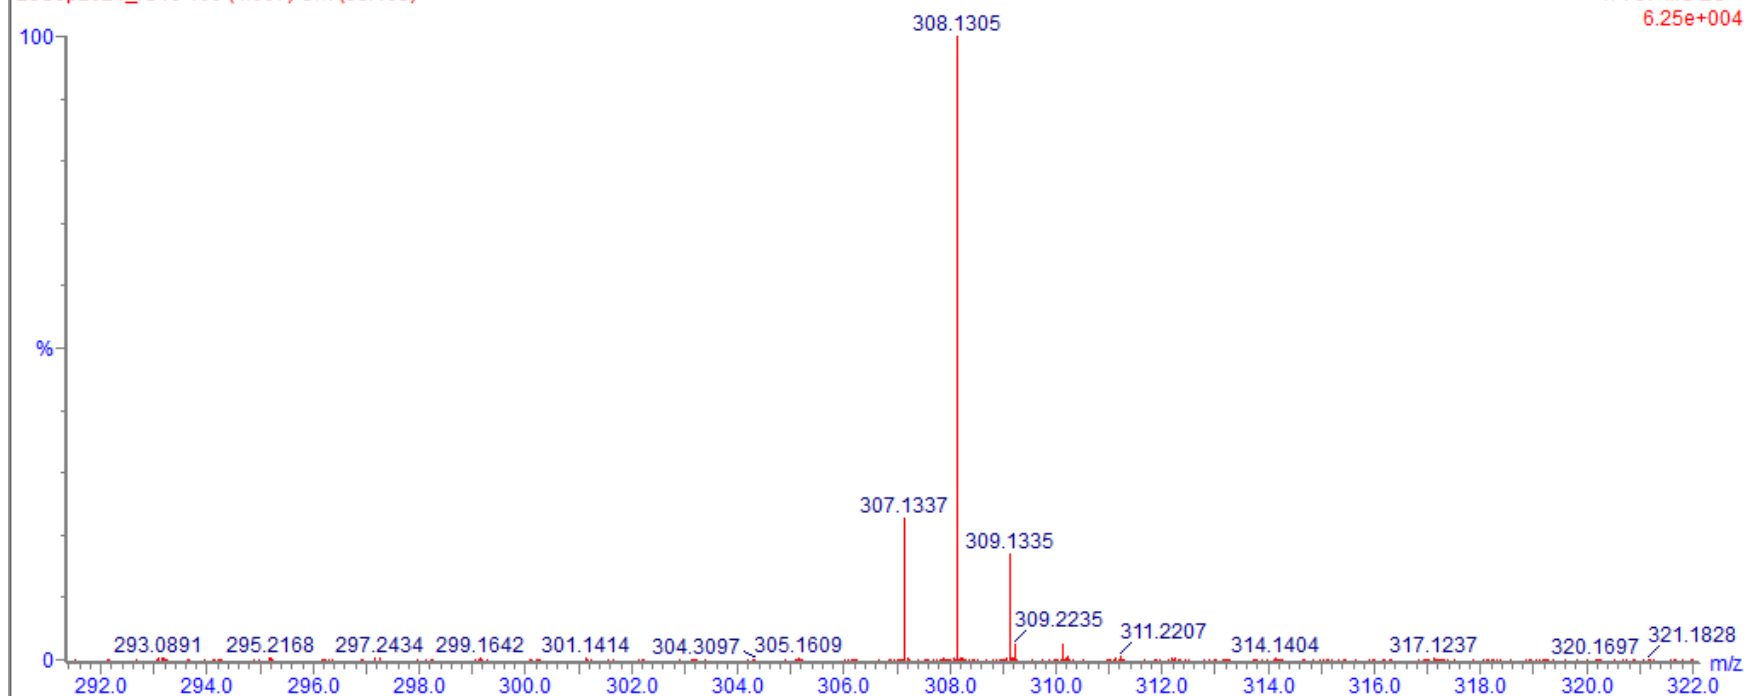

AEPD-0068

29Sep2021\_IG16

1: TOF MS ES+  
325.157 0.0500Da  
2.05e5

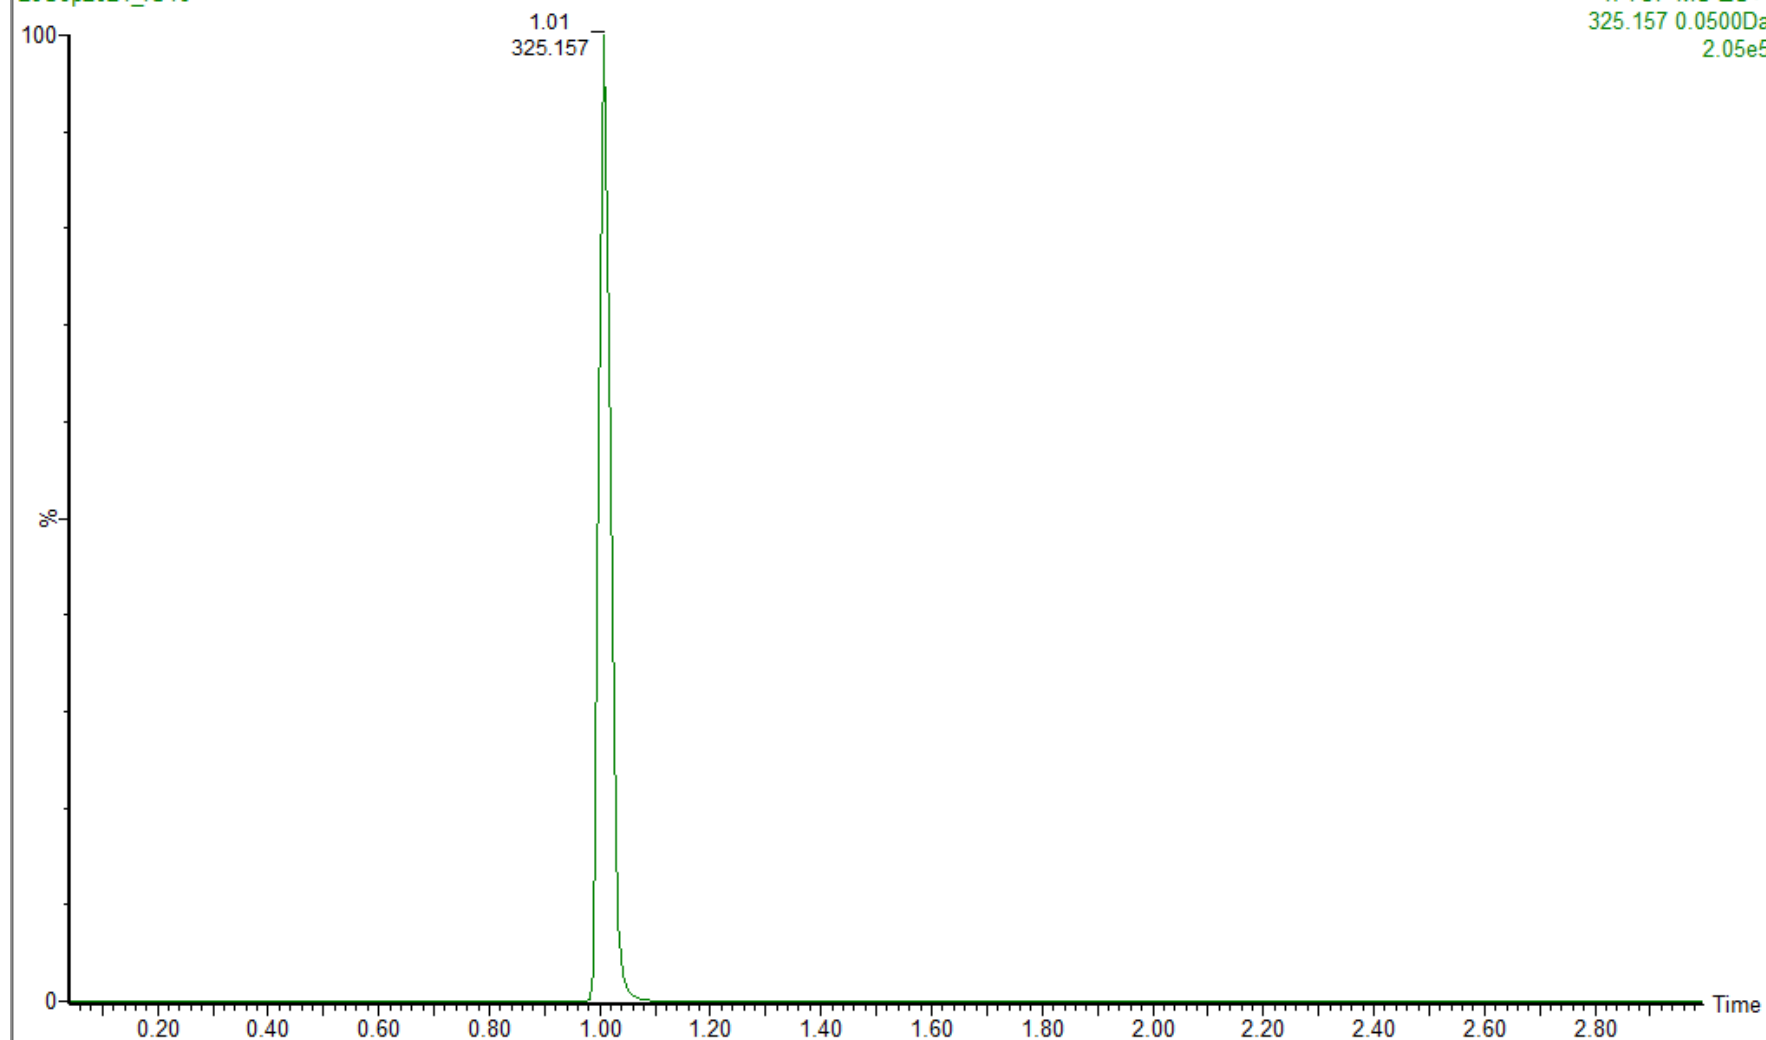



**2-(3,5-Dimethylisoxazol-4-yl)-6-methyl-1,3,6,2-dioxazaborocane-4,8-dione 9**

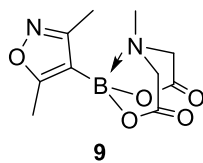

2-(3,5-dimethylisoxazol-4-yl)-6-methyl-1,3,6,2-dioxazaborocane-4,8-dione

Chemical Formula:  $C_{10}H_{13}BN_2O_5$

Molecular Weight: 252.03

Yield = 154.0 mg (57%).

PROTON\_01  
AEPD-0049-1

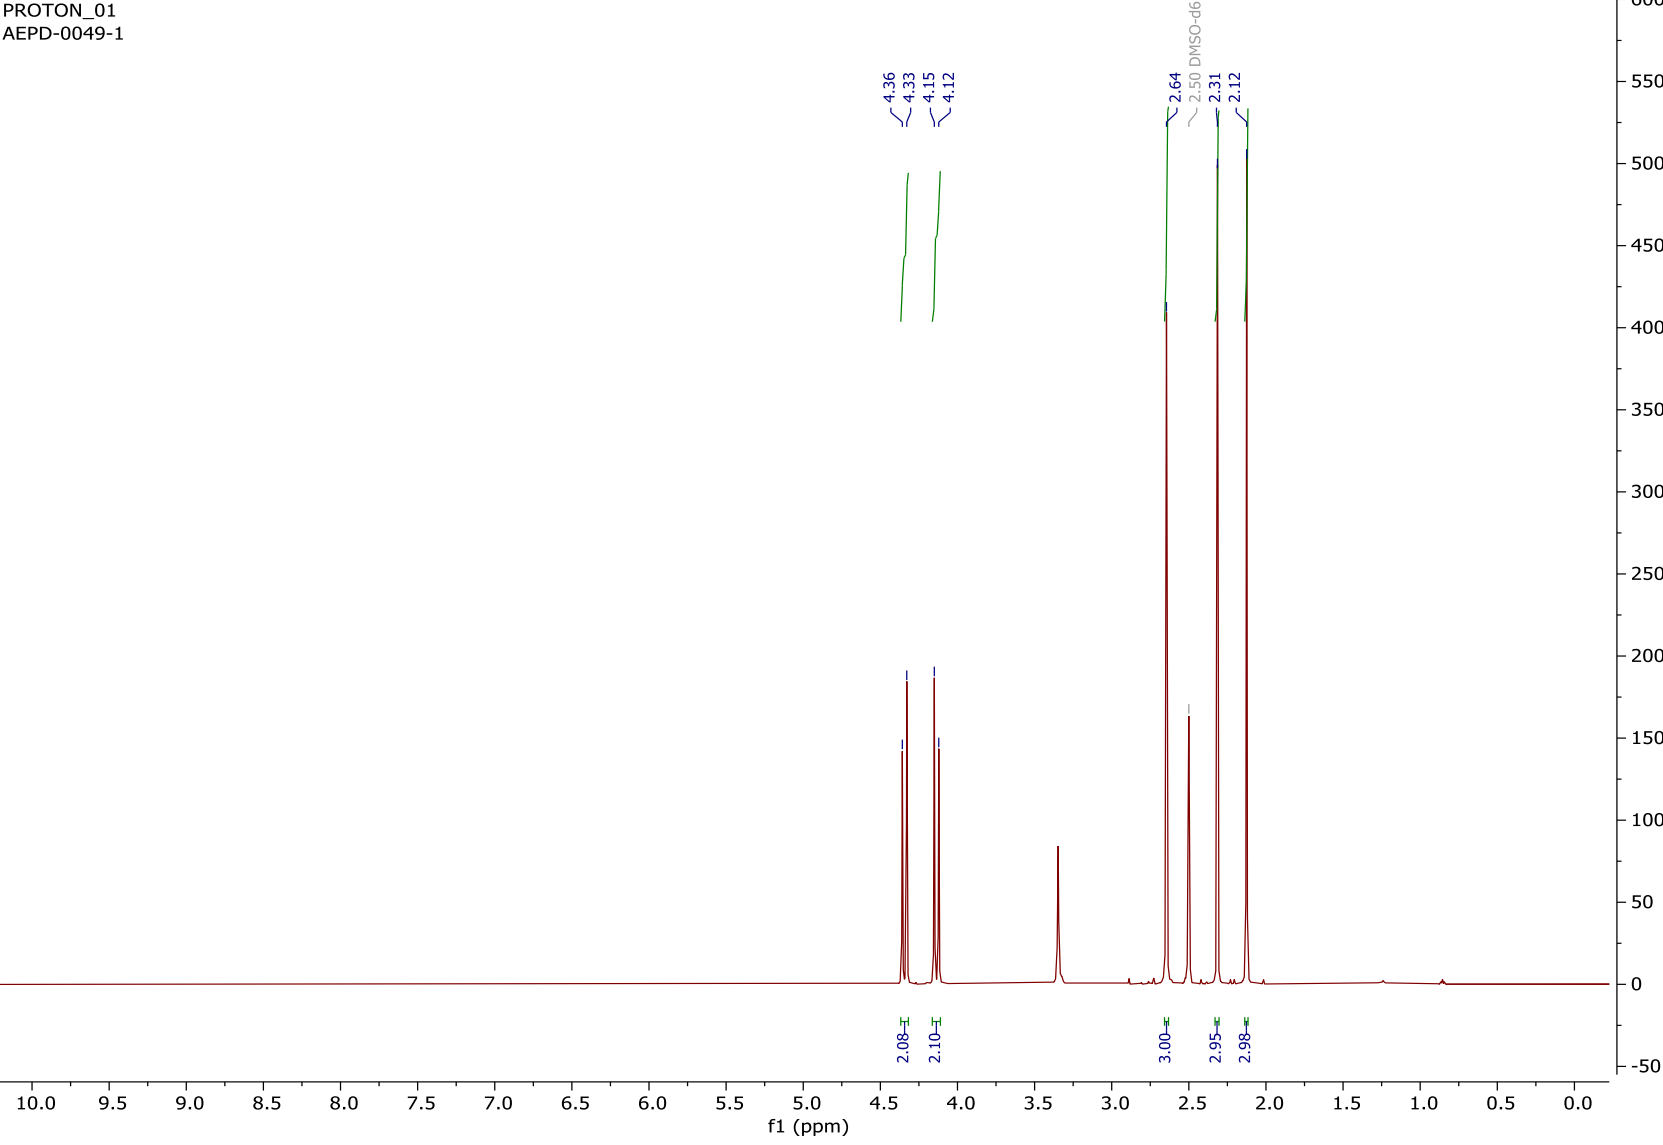

CARBON\_01  
AEPD-0049-1

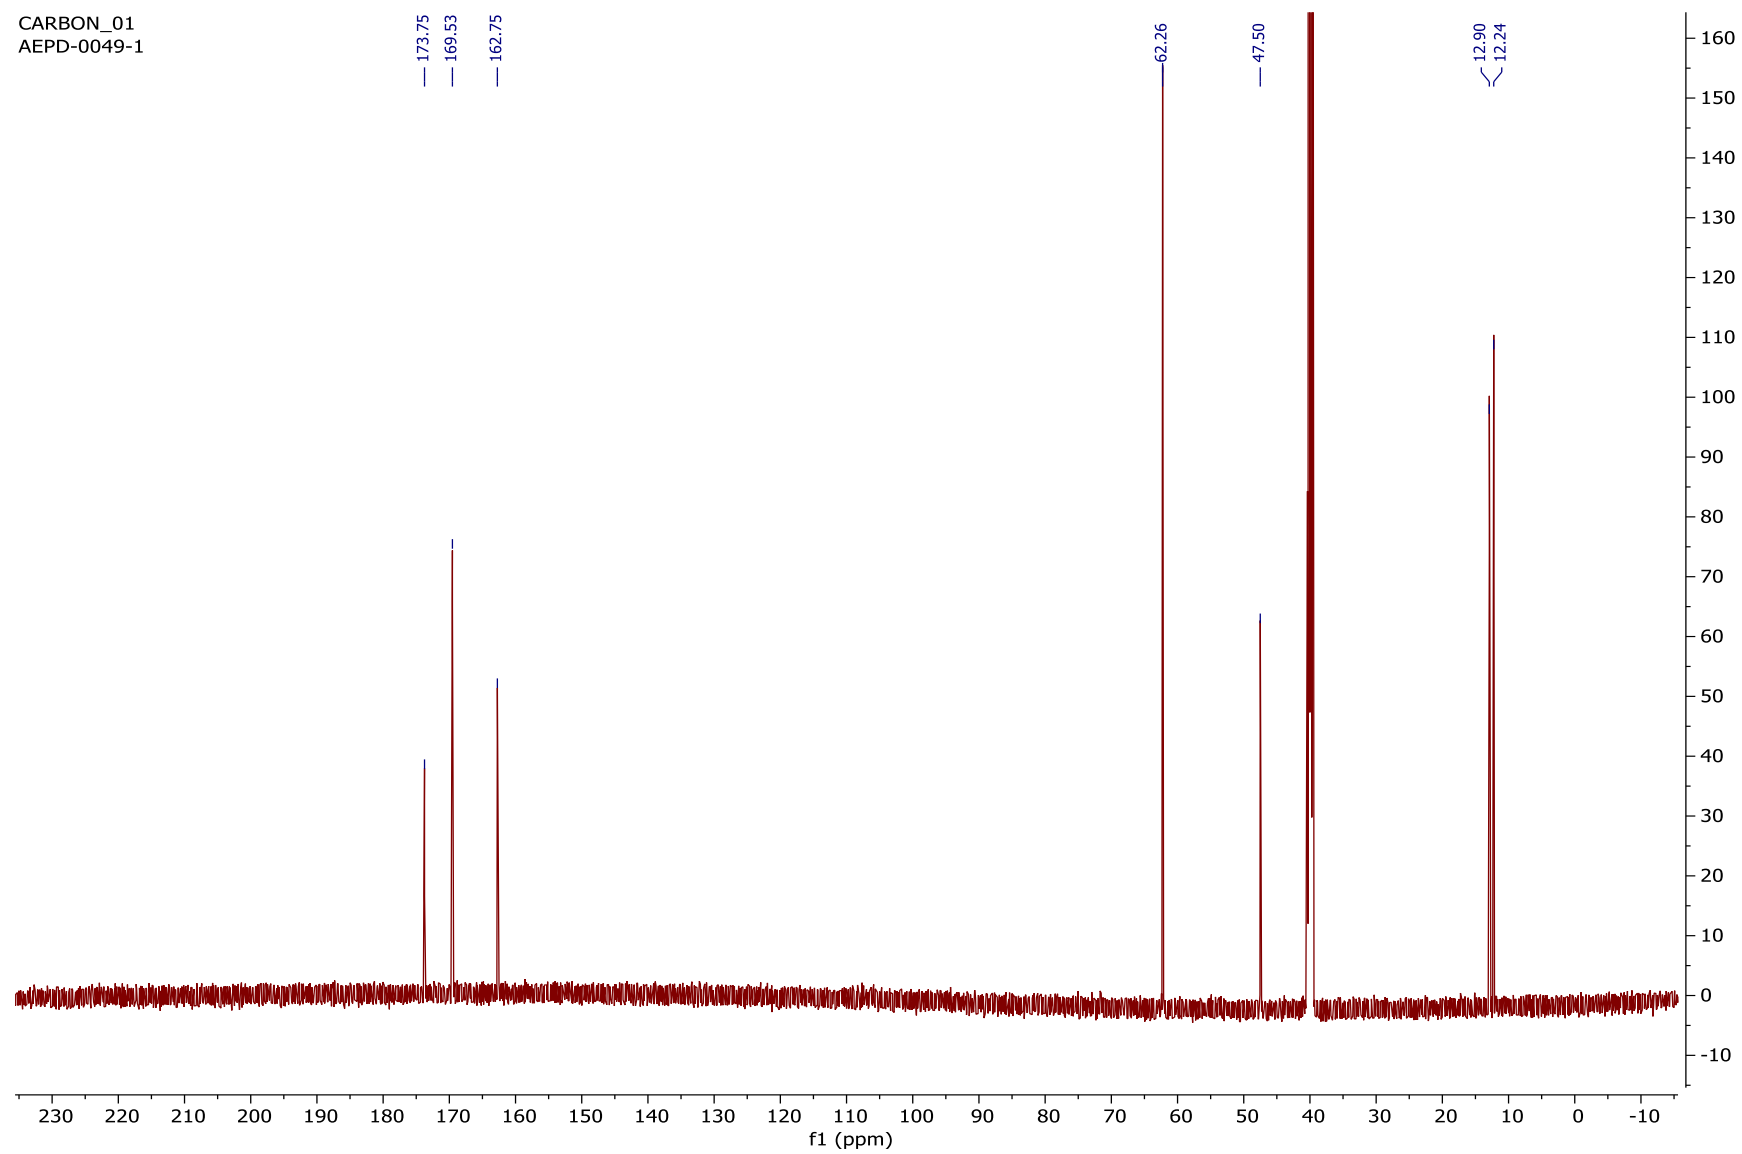

### Single Mass Analysis

Tolerance = 5.0 mDa / DBE: min = -1.5, max = 120.0

Element prediction: Off

Number of isotope peaks used for i-FIT = 3

Monoisotopic Mass, Even Electron Ions

22 formula(e) evaluated with 1 results within limits (up to 20 best isotopic matches for each mass)

Elements Used:

| Mass     | Calc. Mass | mDa | PPM | DBE | Formula           | i-FIT | i-FIT Norm | Fit Conf % | C  | H  | 11B | N | O |
|----------|------------|-----|-----|-----|-------------------|-------|------------|------------|----|----|-----|---|---|
| 253.1007 | 253.0996   | 1.1 | 4.3 | 5.5 | C10 H14 11B N2 O5 | 67.3  | n/a        | n/a        | 10 | 14 | 1   | 2 | 5 |

AEPD-0049

29Sep2021\_IG04 82 (0.830)

1: TOF MS ES+  
4.02e+004

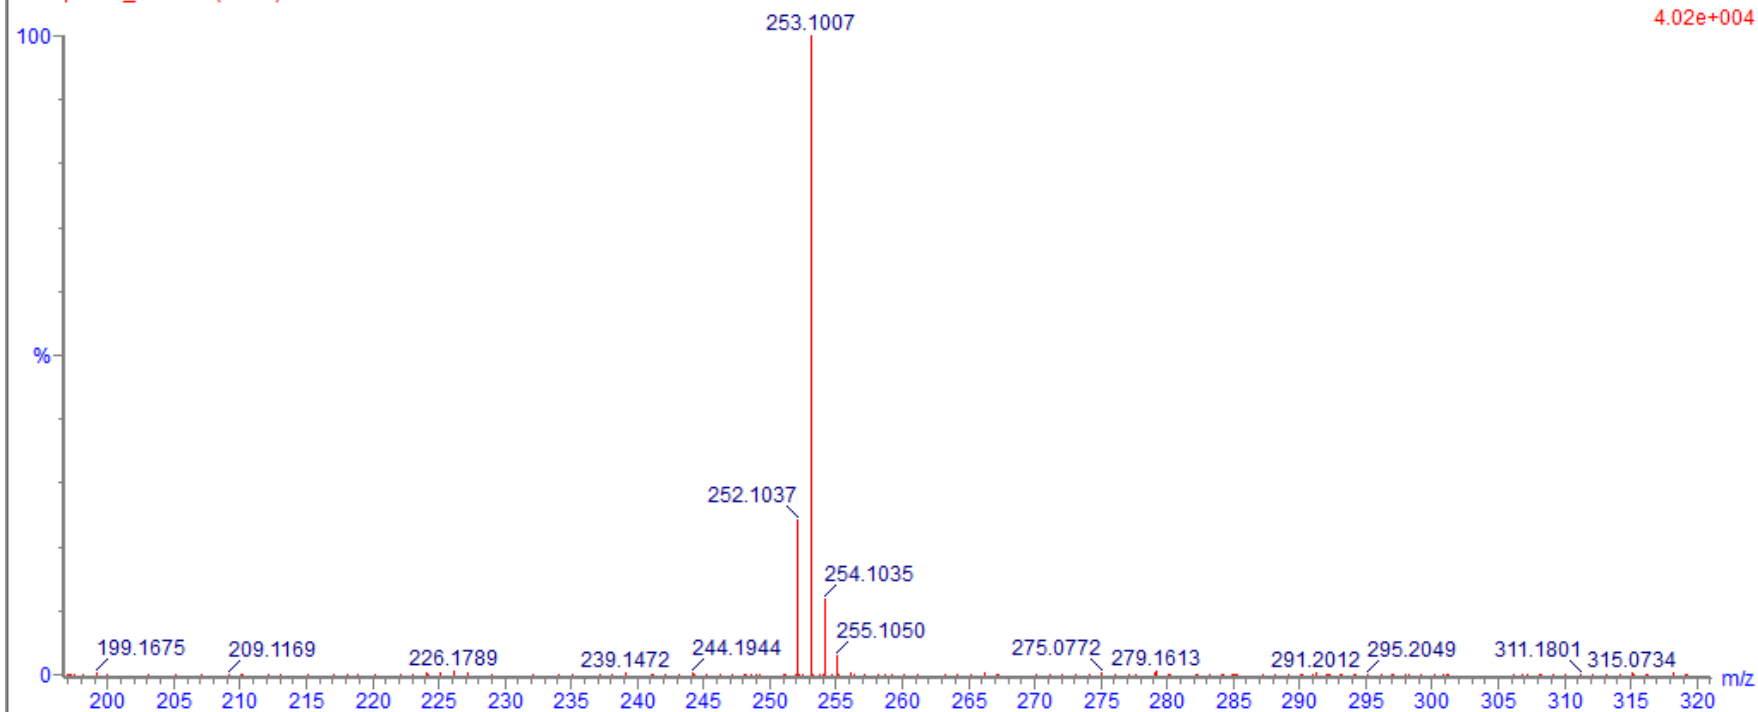

AEPD-0049

29Sep2021\_IG04

1: TOF MS ES+  
253.101 0.0500Da  
4.02e4

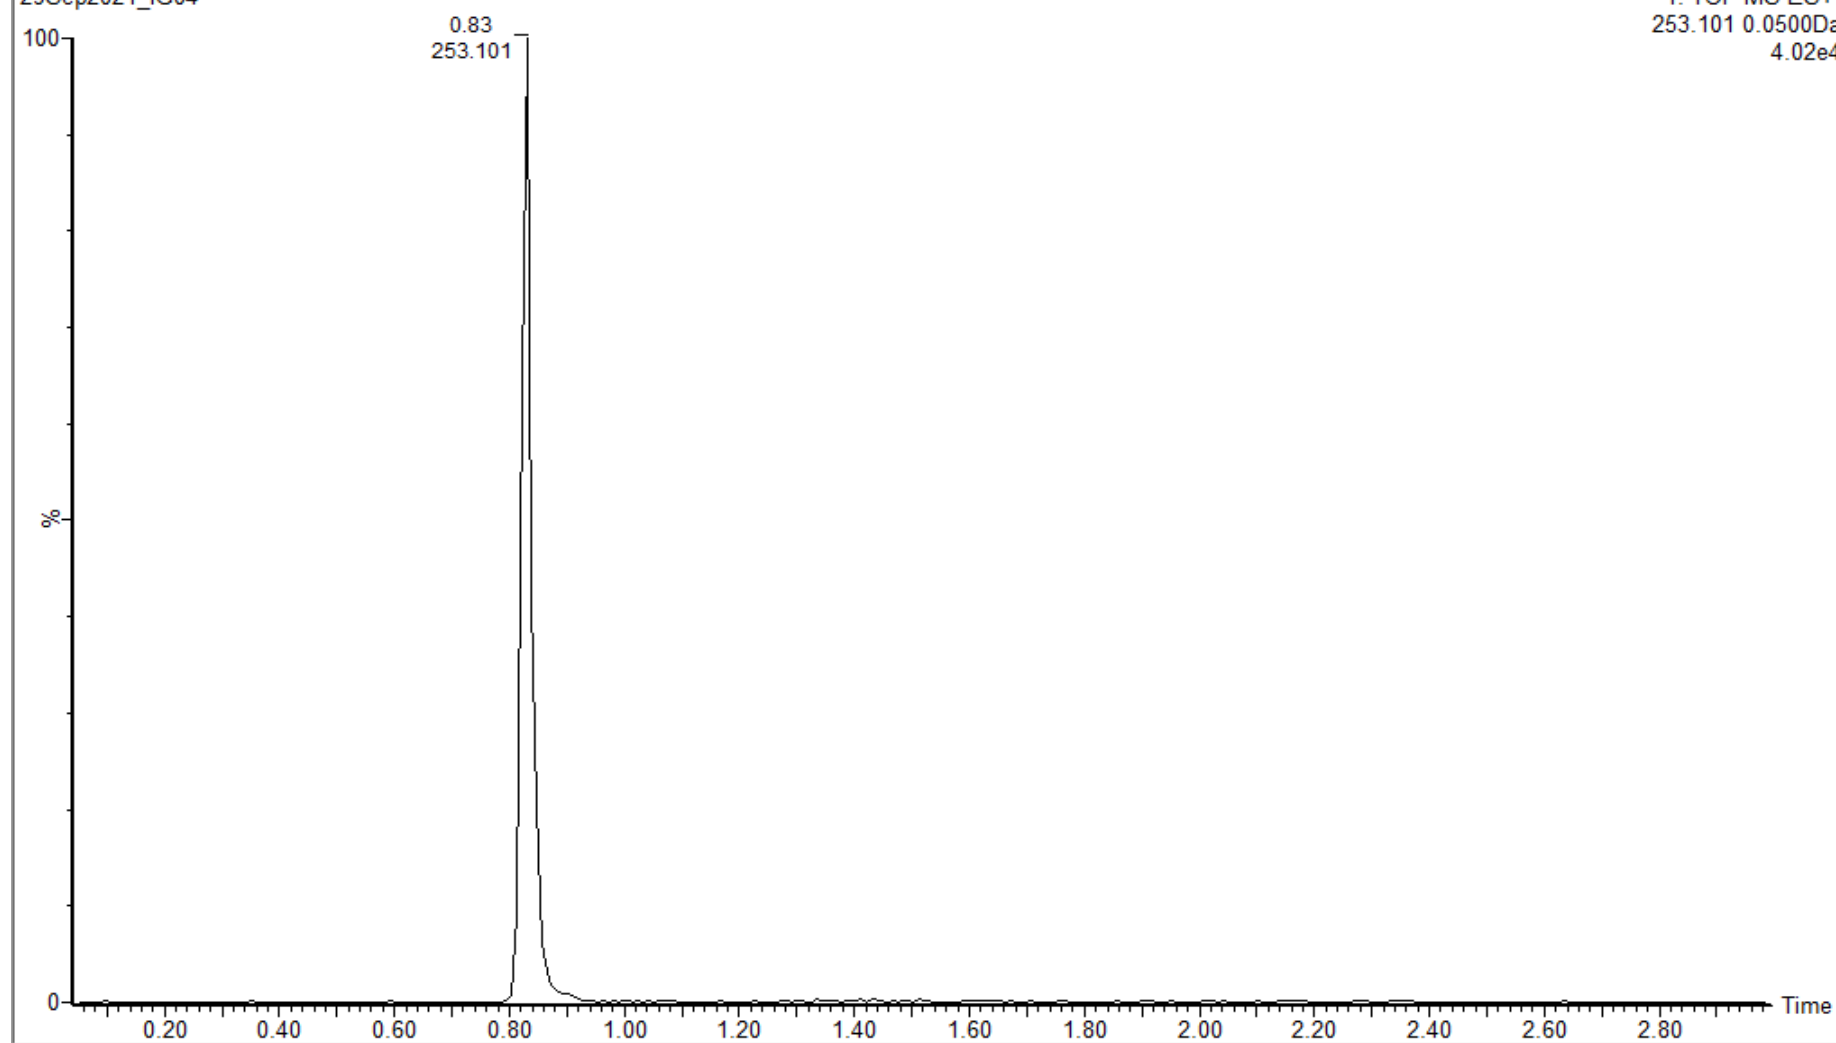

**6-Methyl-2-propyl-1,3,6,2-dioxazaborocane-4,8-dione 10**

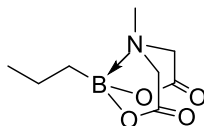

6-methyl-2-propyl-1,3,6,2-dioxazaborocane-4,8-dione

Chemical Formula:  $C_8H_{14}BNO_4$

Molecular Weight: 199.0121

Yield = 34.4 mg (17%).

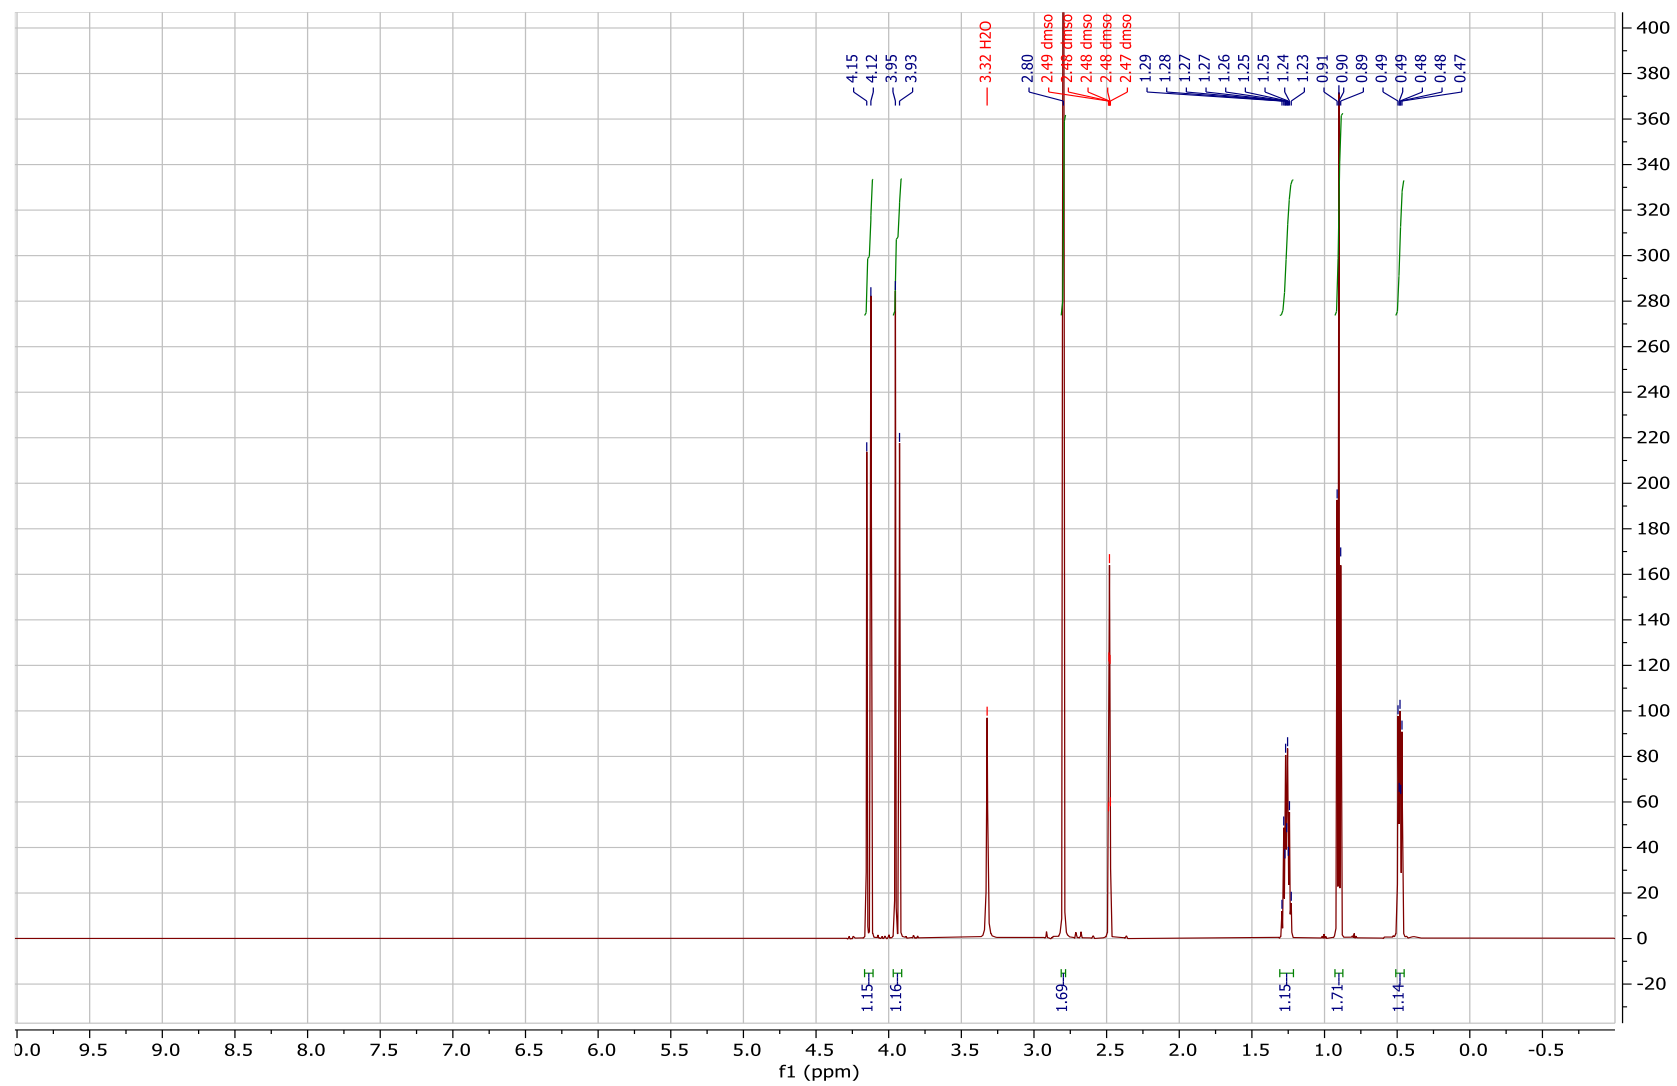

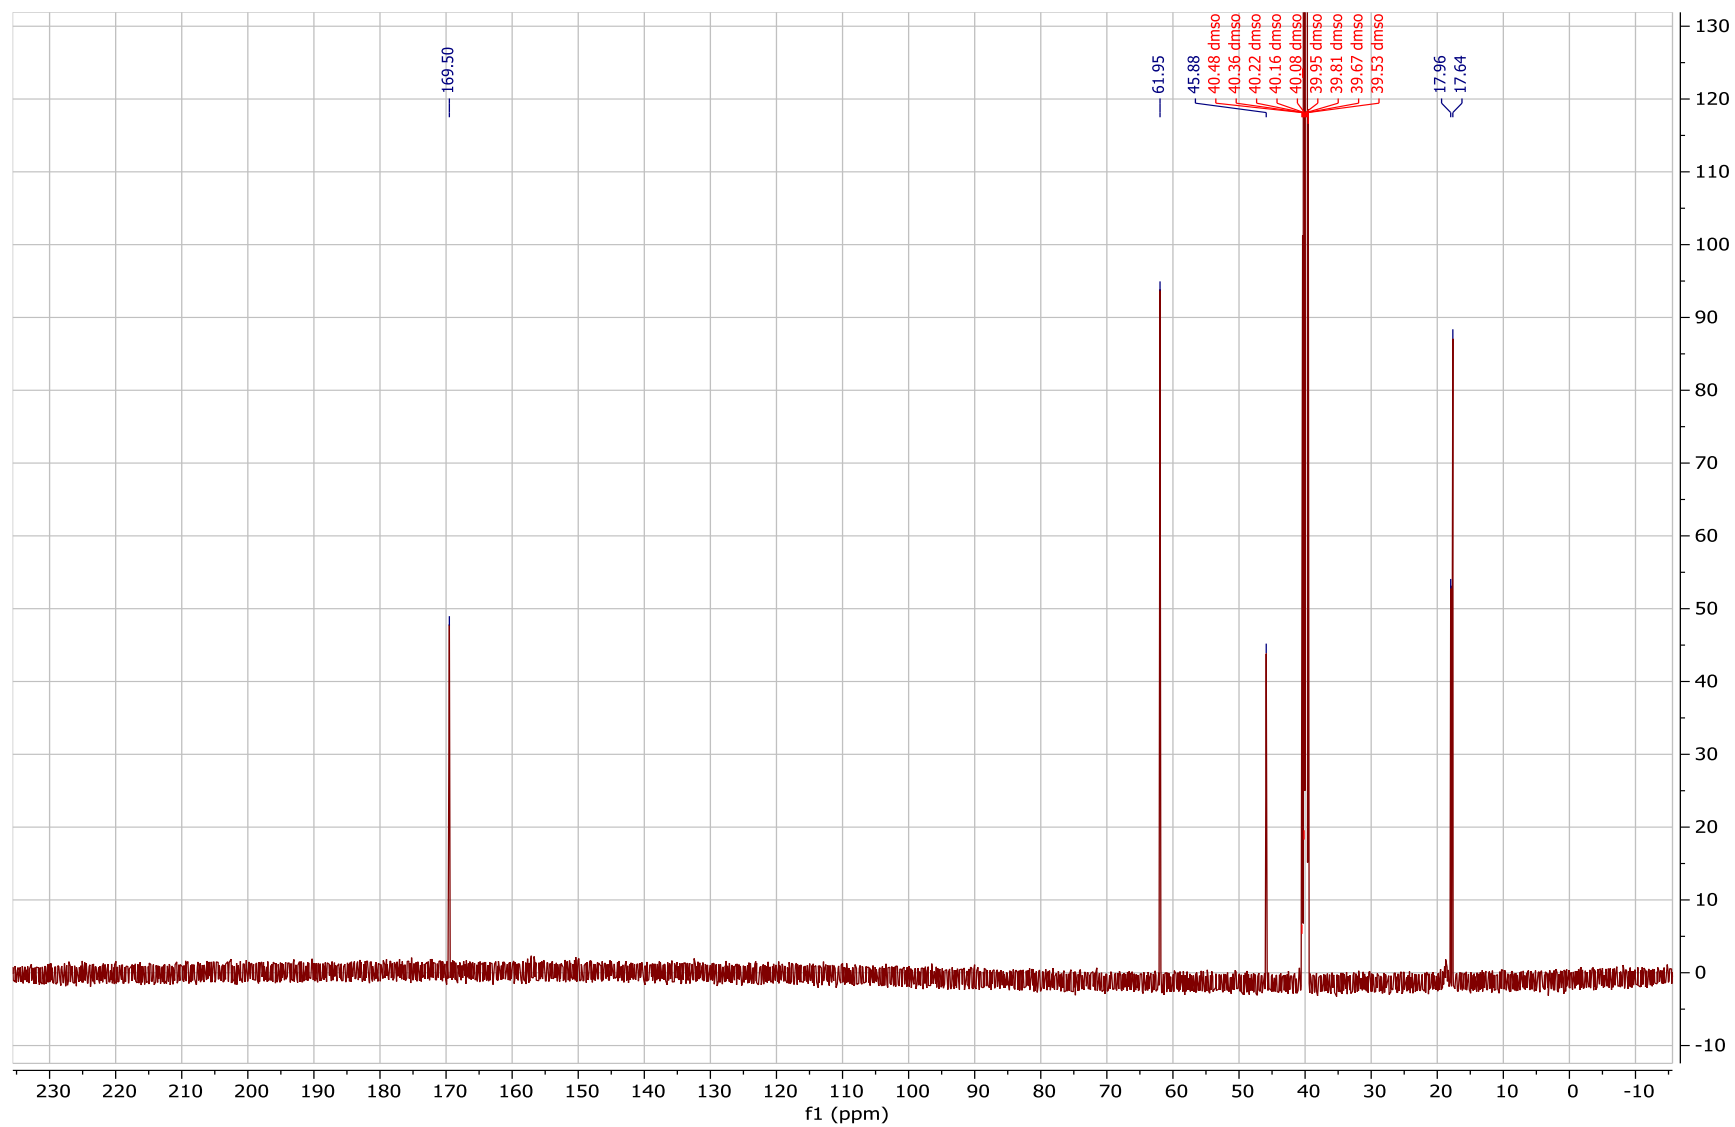



### Single Mass Analysis

Tolerance = 5.0 mDa / DBE: min = -1.5, max = 120.0

Element prediction: Off

Number of isotope peaks used for i-FIT = 3

Monoisotopic Mass, Even Electron Ions

28 formula(e) evaluated with 1 results within limits (up to 20 best isotopic matches for each mass)

Elements Used:

| Mass     | Calc. Mass | mDa | PPM | DBE | Formula         | i-FIT | i-FIT Norm | Fit Conf % | C | H  | 11B | N | O |
|----------|------------|-----|-----|-----|-----------------|-------|------------|------------|---|----|-----|---|---|
| 200.1094 | 200.1094   | 0.0 | 0.0 | 2.5 | C8 H15 11B N O4 | 92.3  | n/a        | n/a        | 8 | 15 | 1   | 1 | 4 |

INTER043

29Sep2021\_IG32 92 (0.937) Cm (91:95)

1: TOF MS ES+  
4.35e+004

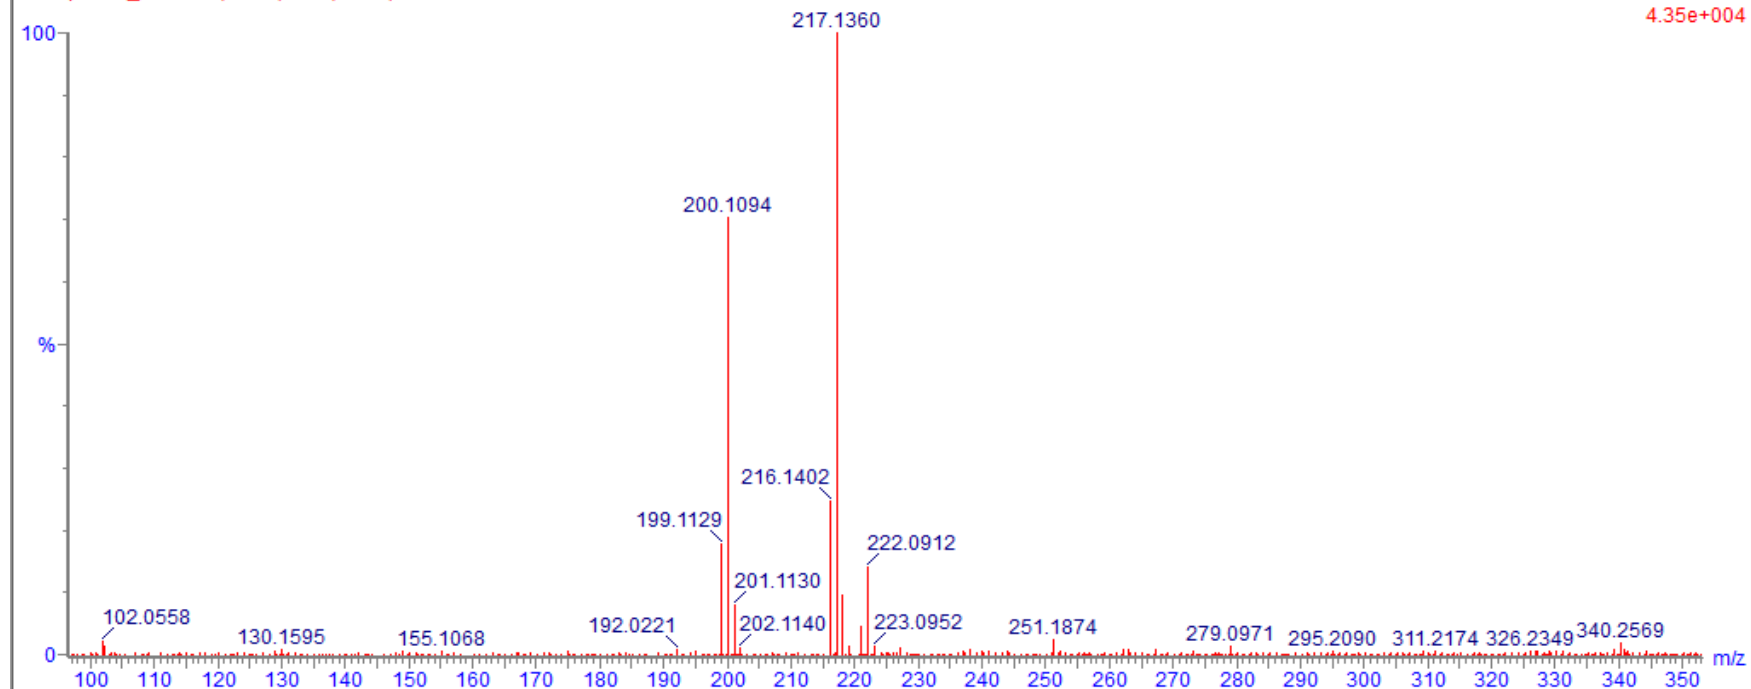

INTER043

29Sep2021\_IG32

1: TOF MS ES+  
217.136 0.0500Da  
1.96e4

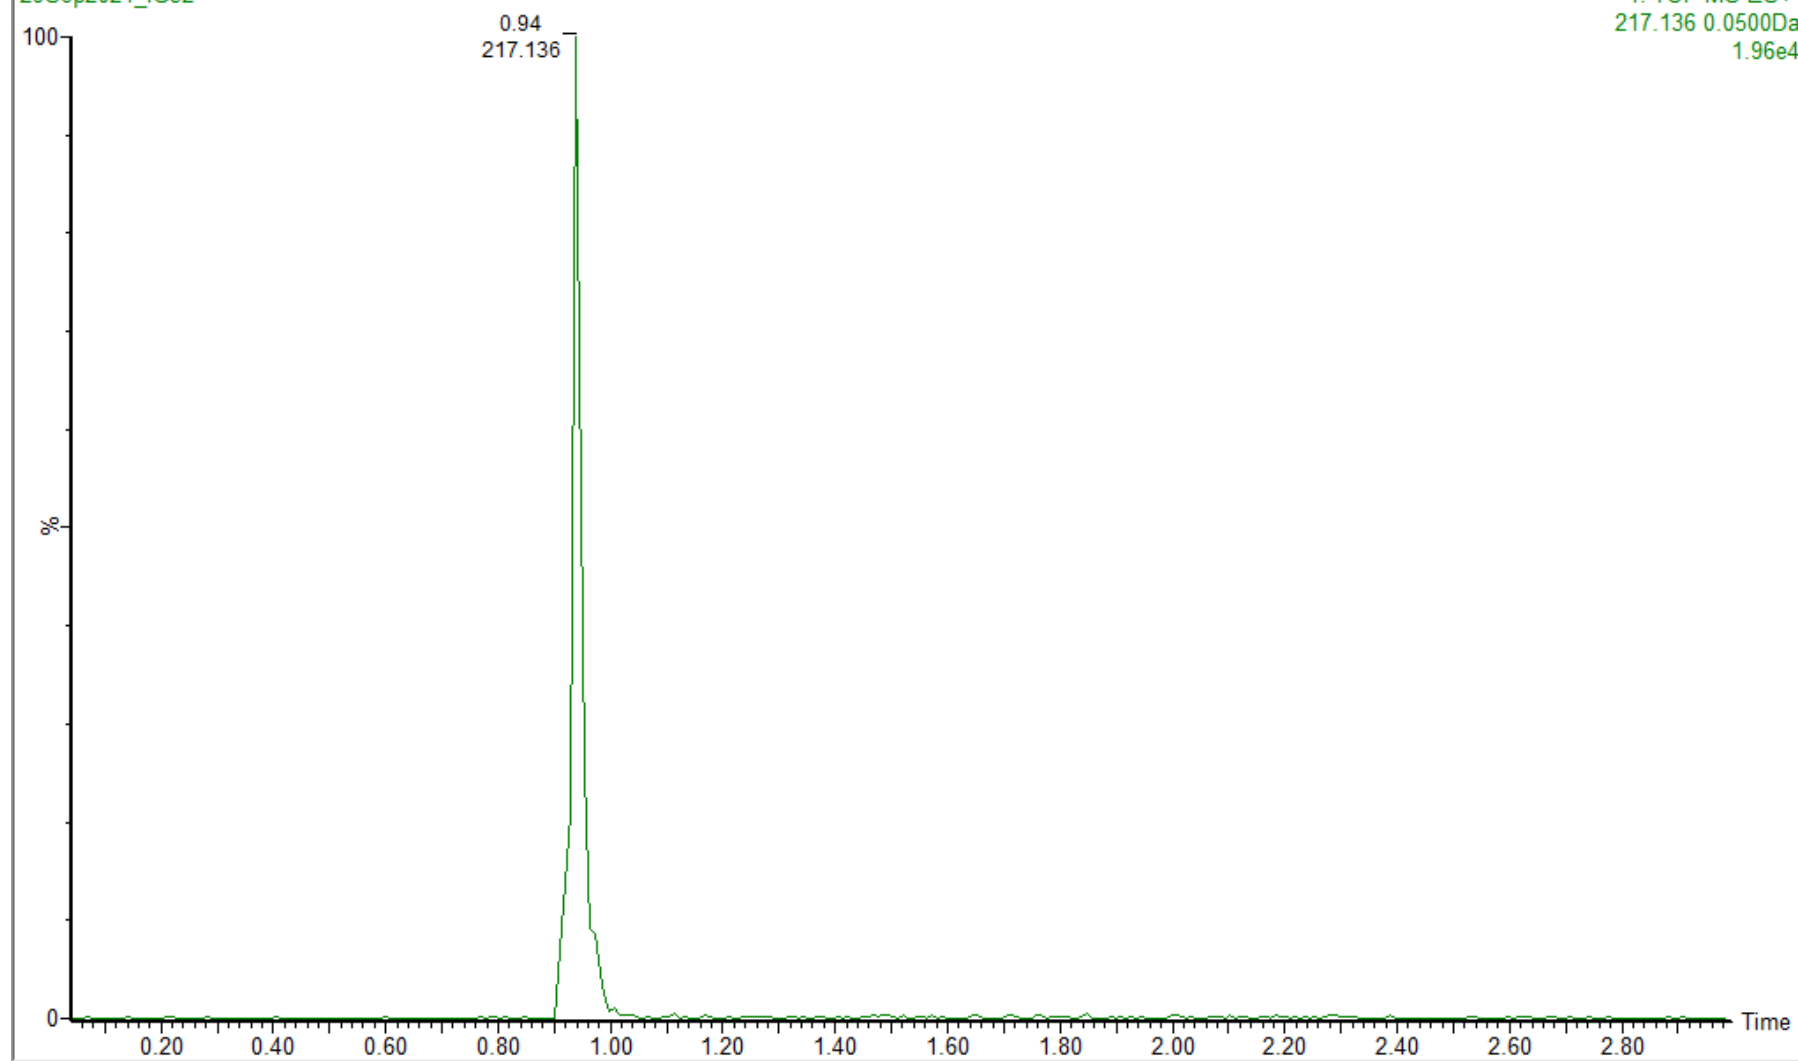

**6-Methyl-2-(1-methyl-1H-benzo[d]imidazol-5-yl)-1,3,6,2-dioxazaborocane-4,8-dione 11**

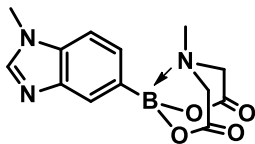

6-methyl-2-(1-methyl-1*H*-benzo[d]imidazol-5-yl)-1,3,6,2-dioxazaborocane-4,8-dione

Chemical Formula: C<sub>13</sub>H<sub>14</sub>BN<sub>3</sub>O<sub>4</sub>

Molecular Weight: 287.0790

Yield = 161.0 mg (56%).

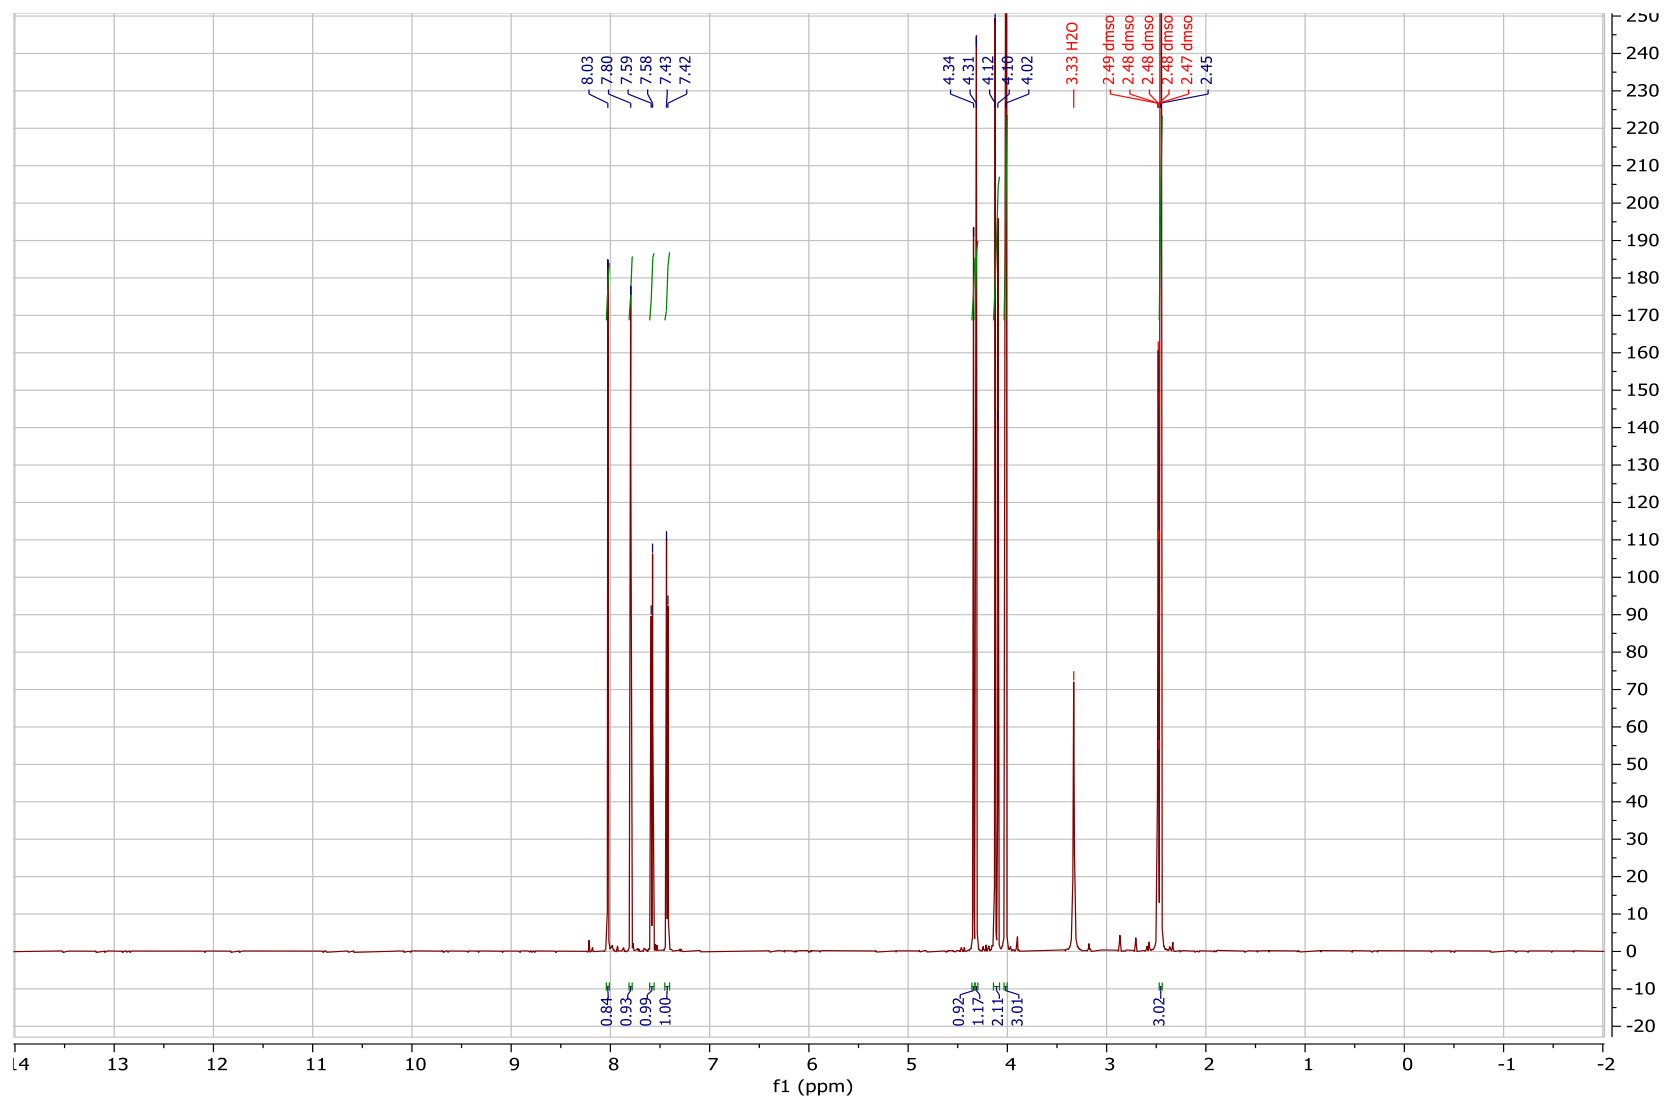

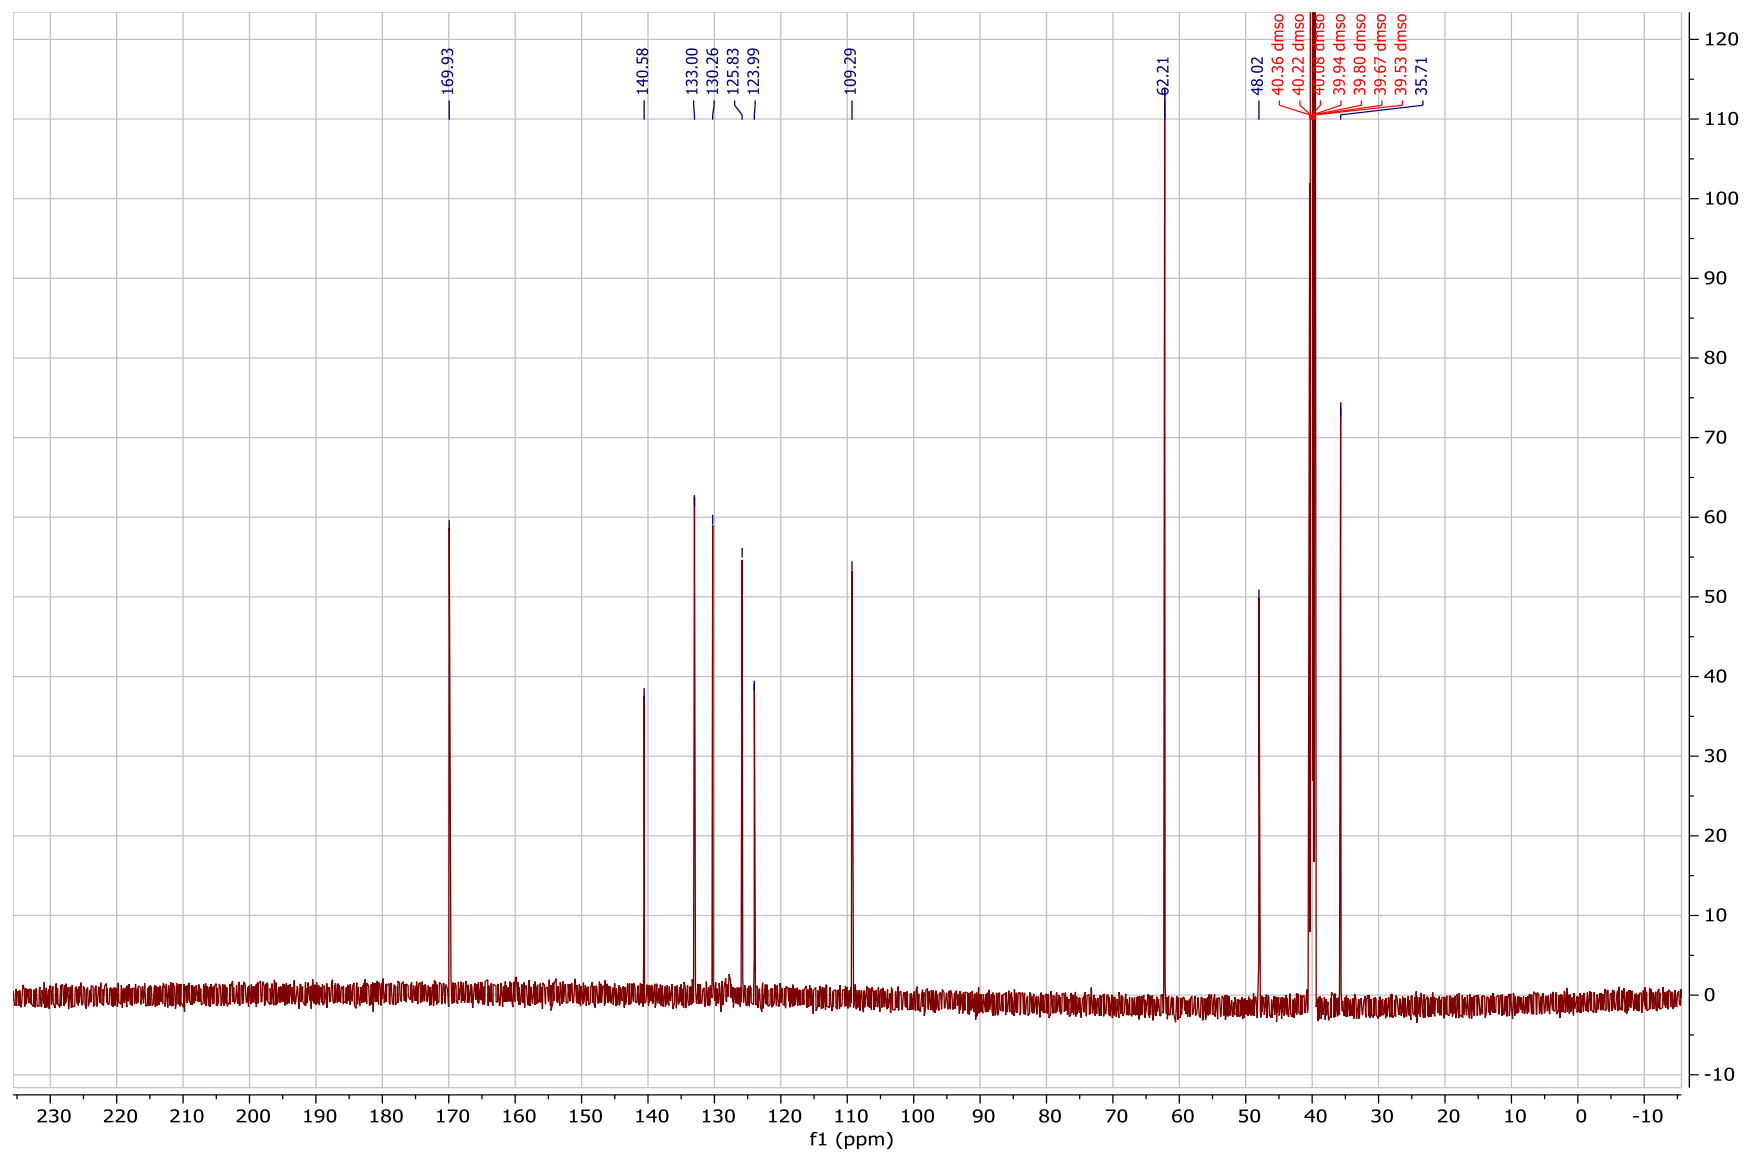

### Single Mass Analysis

Tolerance = 5.0 mDa / DBE: min = -1.5, max = 120.0

Element prediction: Off

Number of isotope peaks used for i-FIT = 3

Monoisotopic Mass, Even Electron Ions

36 formula(e) evaluated with 1 results within limits (up to 20 best isotopic matches for each mass)

Elements Used:

| Mass     | Calc. Mass | mDa | PPM | DBE | Formula           | i-FIT | i-FIT Norm | Fit Conf % | C  | H  | 11B | N | O |
|----------|------------|-----|-----|-----|-------------------|-------|------------|------------|----|----|-----|---|---|
| 288.1161 | 288.1156   | 0.5 | 1.7 | 8.5 | C13 H15 11B N3 O4 | 408.5 | n/a        | n/a        | 13 | 15 | 1   | 3 | 4 |

INTER040

29Sep2021\_JG30 90 (0.900) Cm (89:91)

1: TOF MS ES+  
7.19e+005

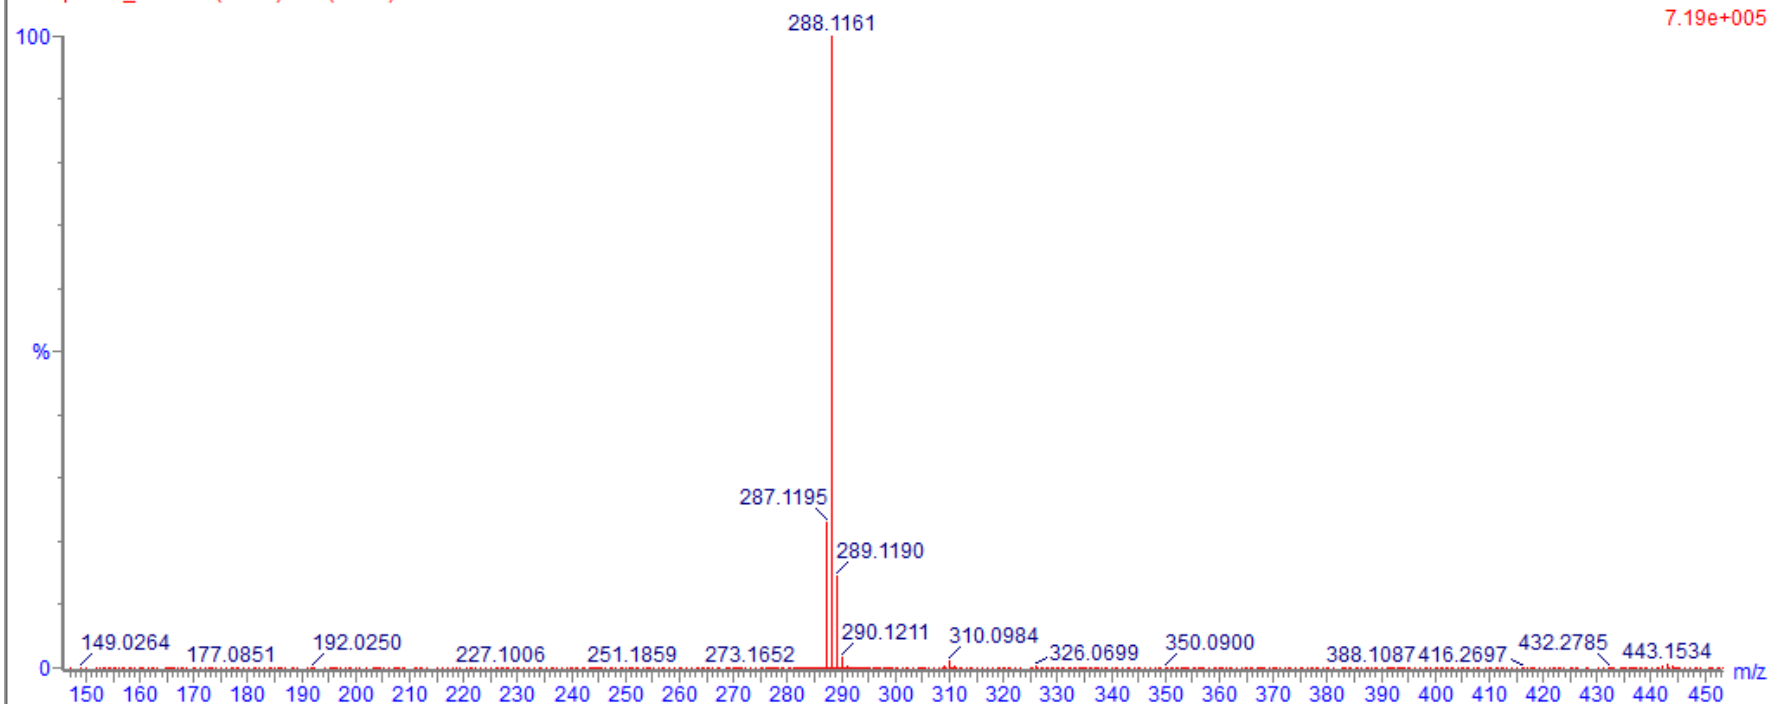

INTER040

29Sep2021\_IG30

1: TOF MS ES+  
288.116 0.0500Da  
3.70e5

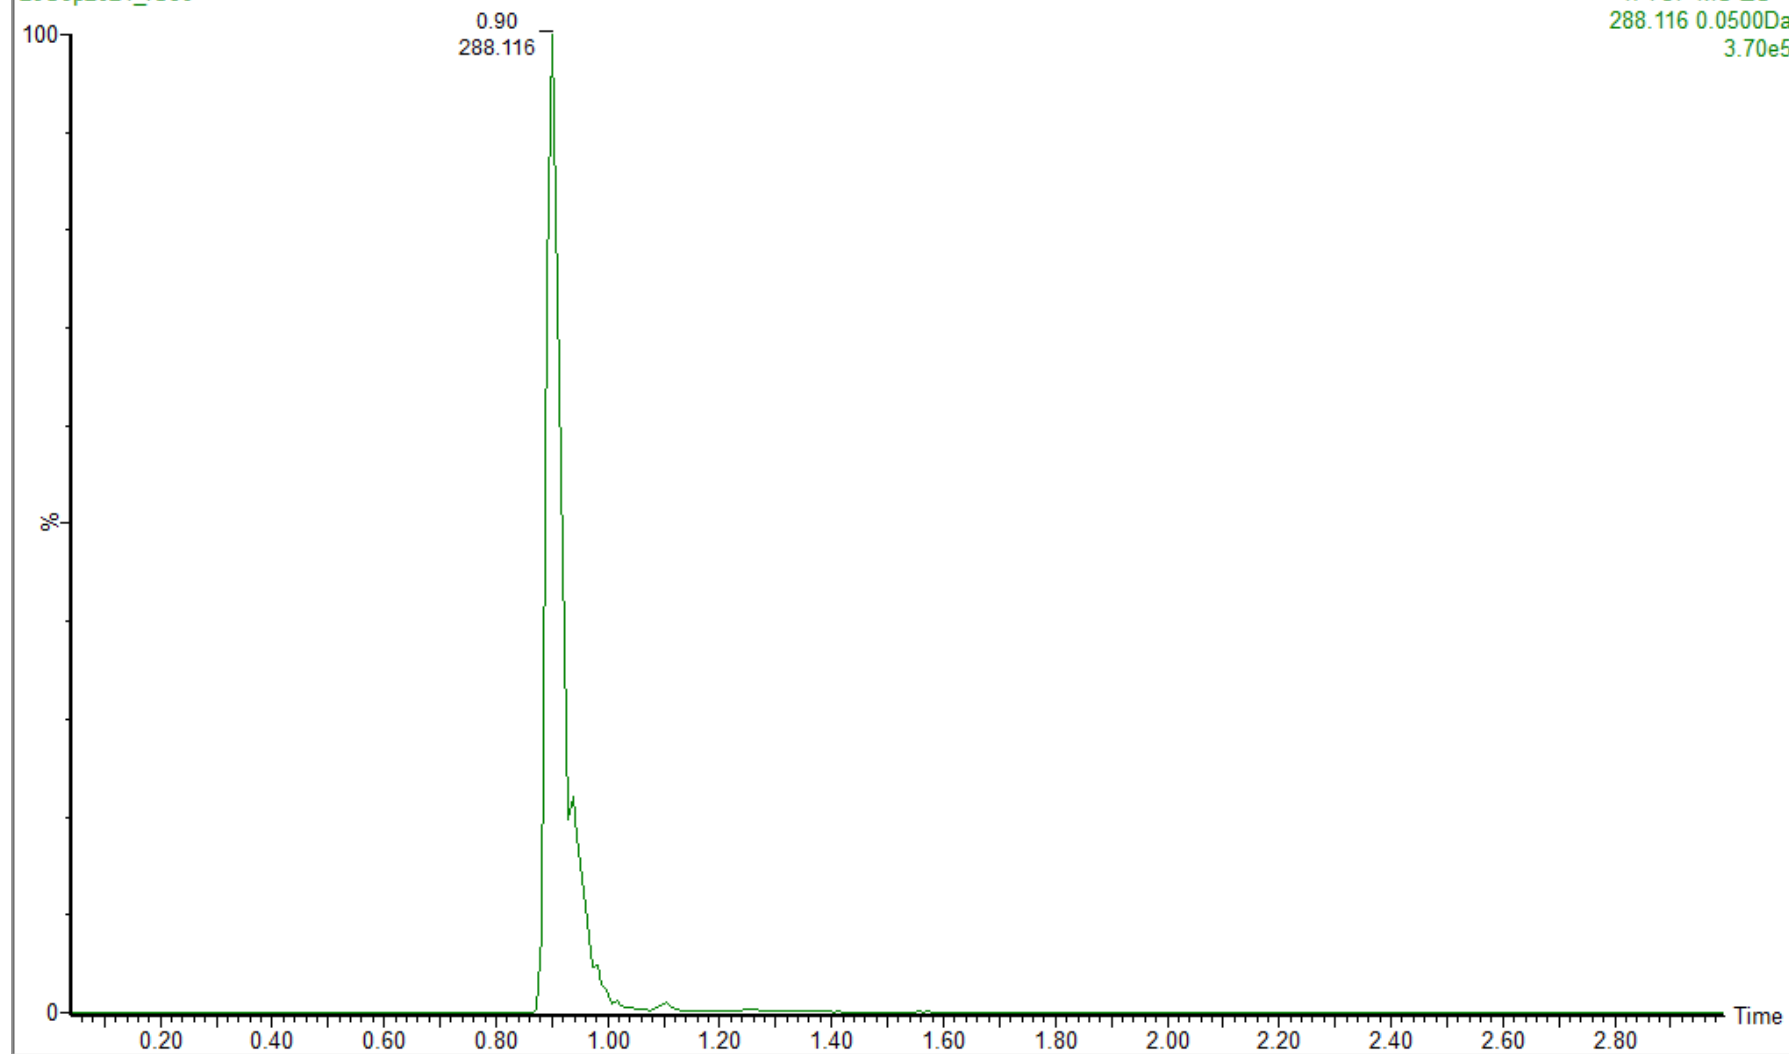

**2-(1*H*-Indol-5-yl)-6-methyl-1,3,6,2-dioxazaborocane-4,8-dione 12**

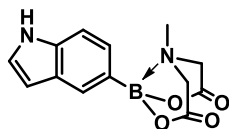

2-(1*H*-indol-5-yl)-6-methyl-1,3,6,2-dioxazaborocane-4,8-dione

Chemical Formula: C<sub>13</sub>H<sub>13</sub>BN<sub>2</sub>O<sub>4</sub>

Molecular Weight: 272.0643

Yield = 142.2 mg (52%).



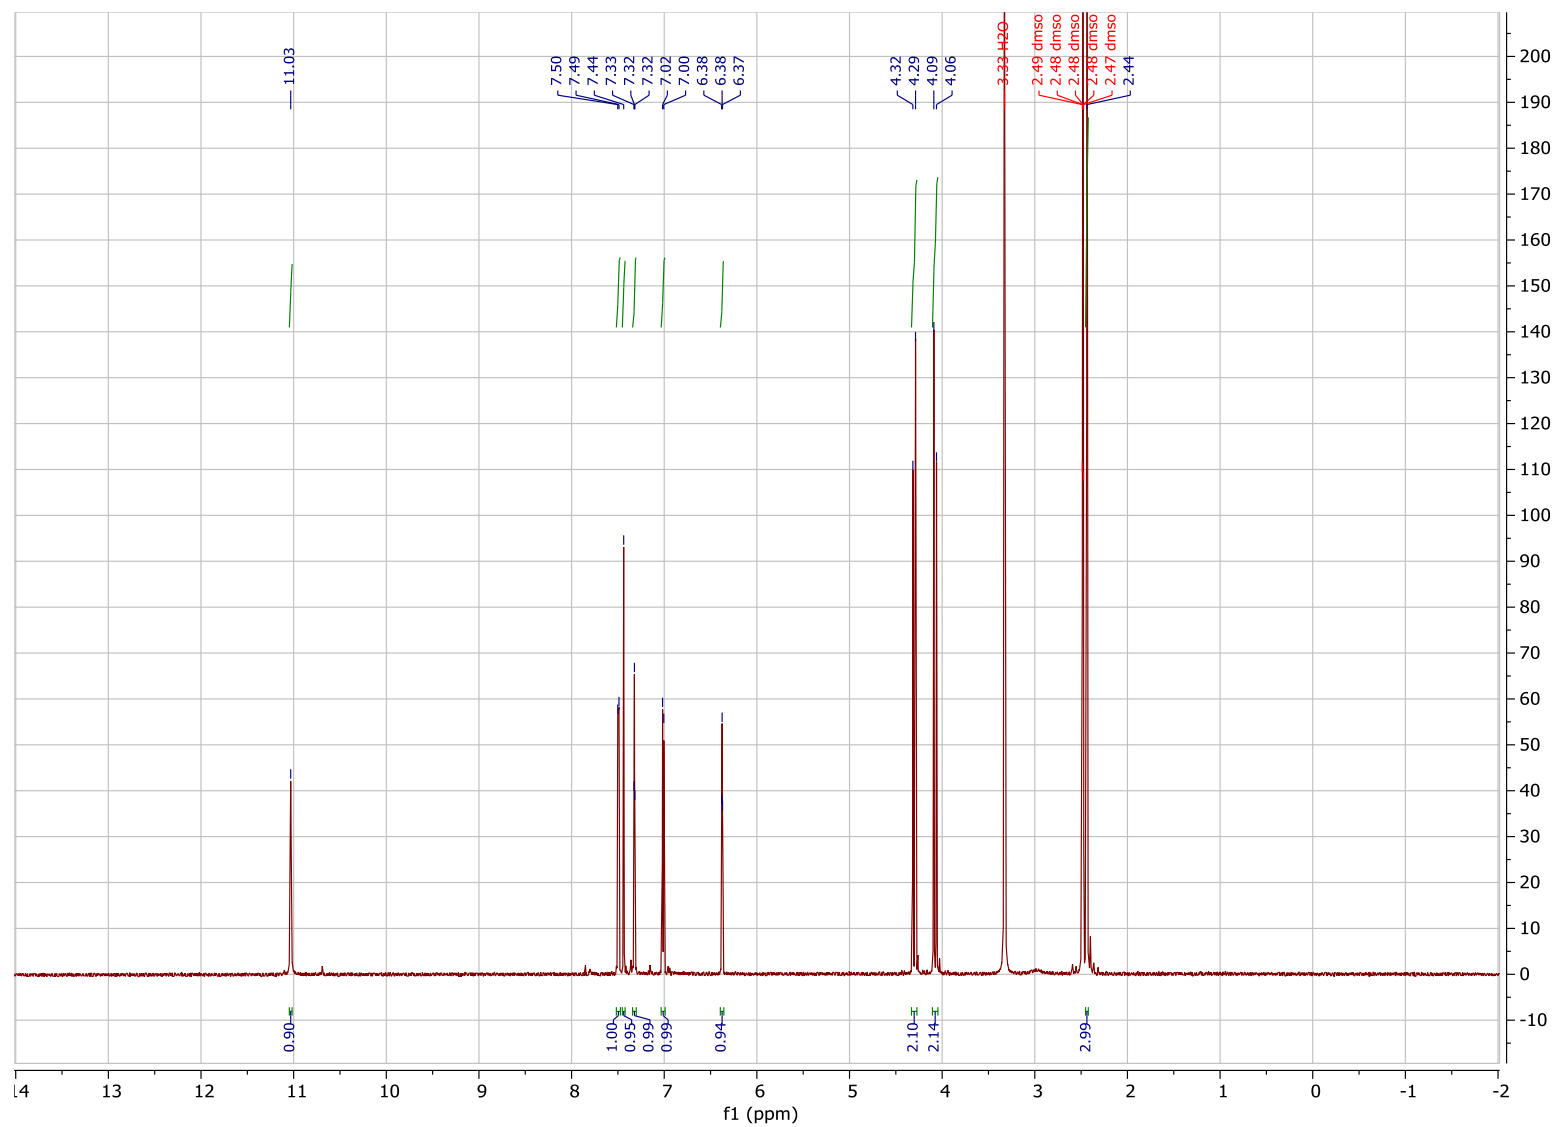

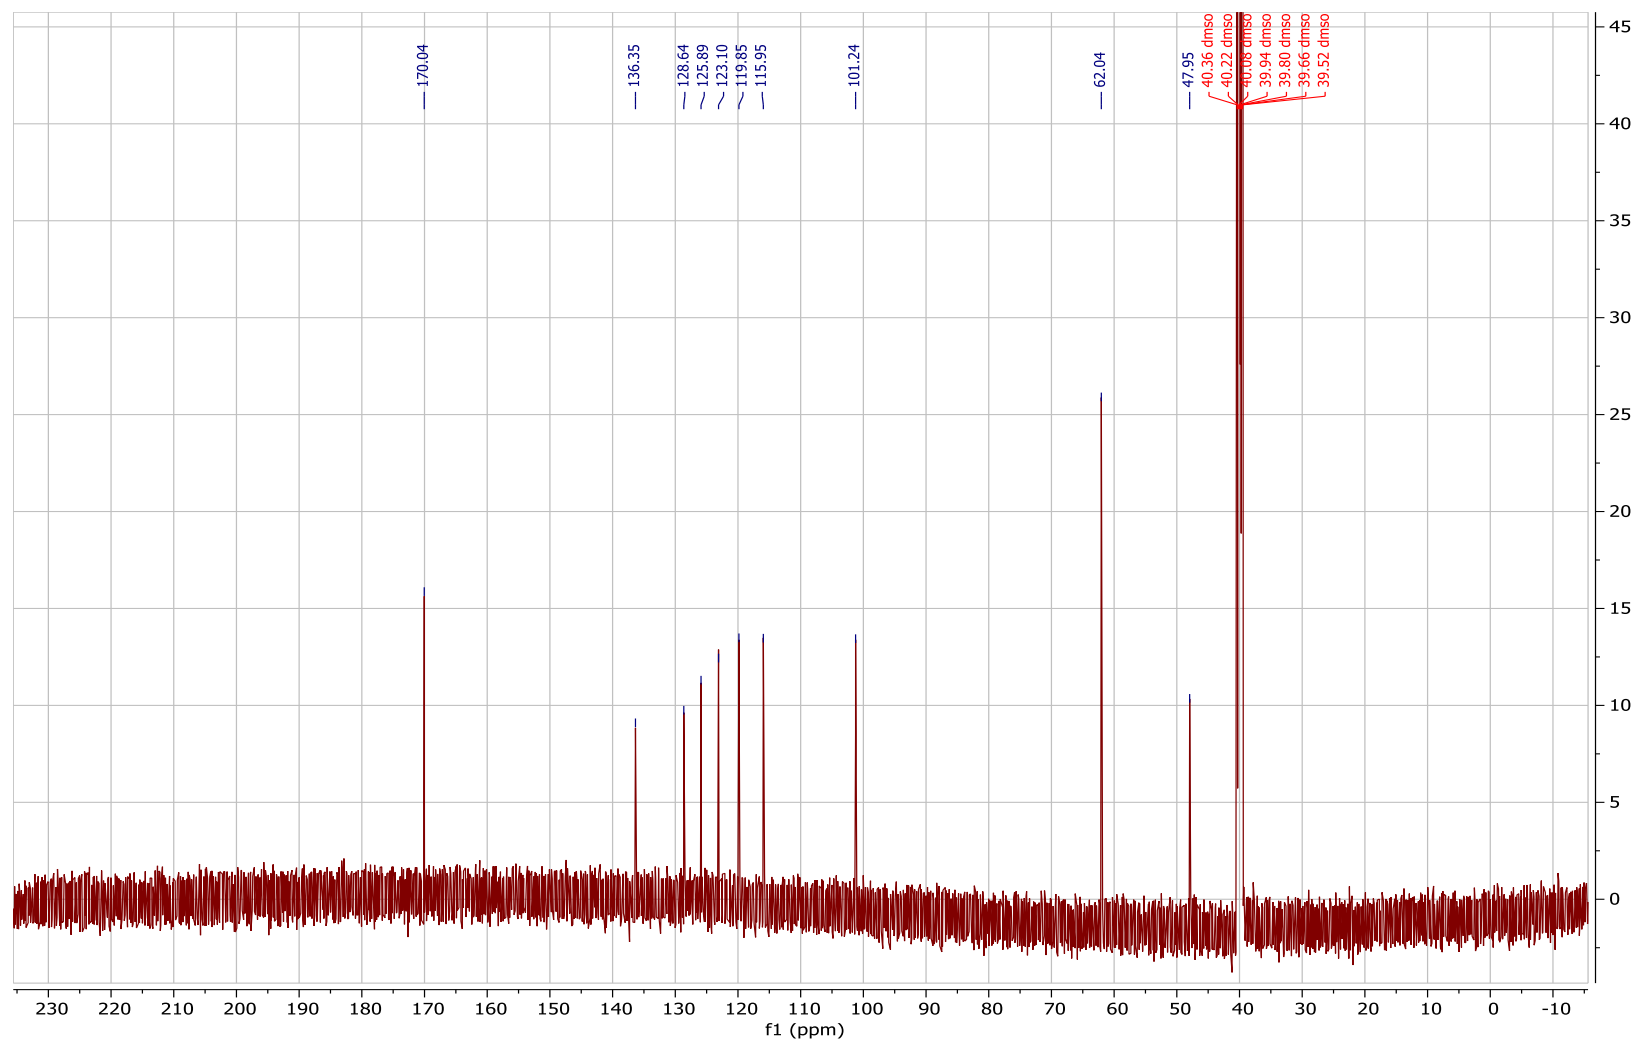

### Single Mass Analysis

Tolerance = 5.0 mDa / DBE: min = -1.5, max = 120.0

Element prediction: Off

Number of isotope peaks used for i-FIT = 3

Monoisotopic Mass, Even Electron Ions

22 formula(e) evaluated with 1 results within limits (up to 20 best isotopic matches for each mass)

Elements Used:

| Mass     | Calc. Mass | mDa | PPM | DBE | Formula           | i-FIT | i-FIT Norm | Fit Conf % | C  | H  | 11B | N | O |
|----------|------------|-----|-----|-----|-------------------|-------|------------|------------|----|----|-----|---|---|
| 273.1051 | 273.1047   | 0.4 | 1.5 | 8.5 | C13 H14 11B N2 O4 | 370.5 | n/a        | n/a        | 13 | 14 | 1   | 2 | 4 |

INTER034

29Sep2021\_IG22 100 (1.007) Cm (99:103)

1: TOF MS ES+  
2.45e+005

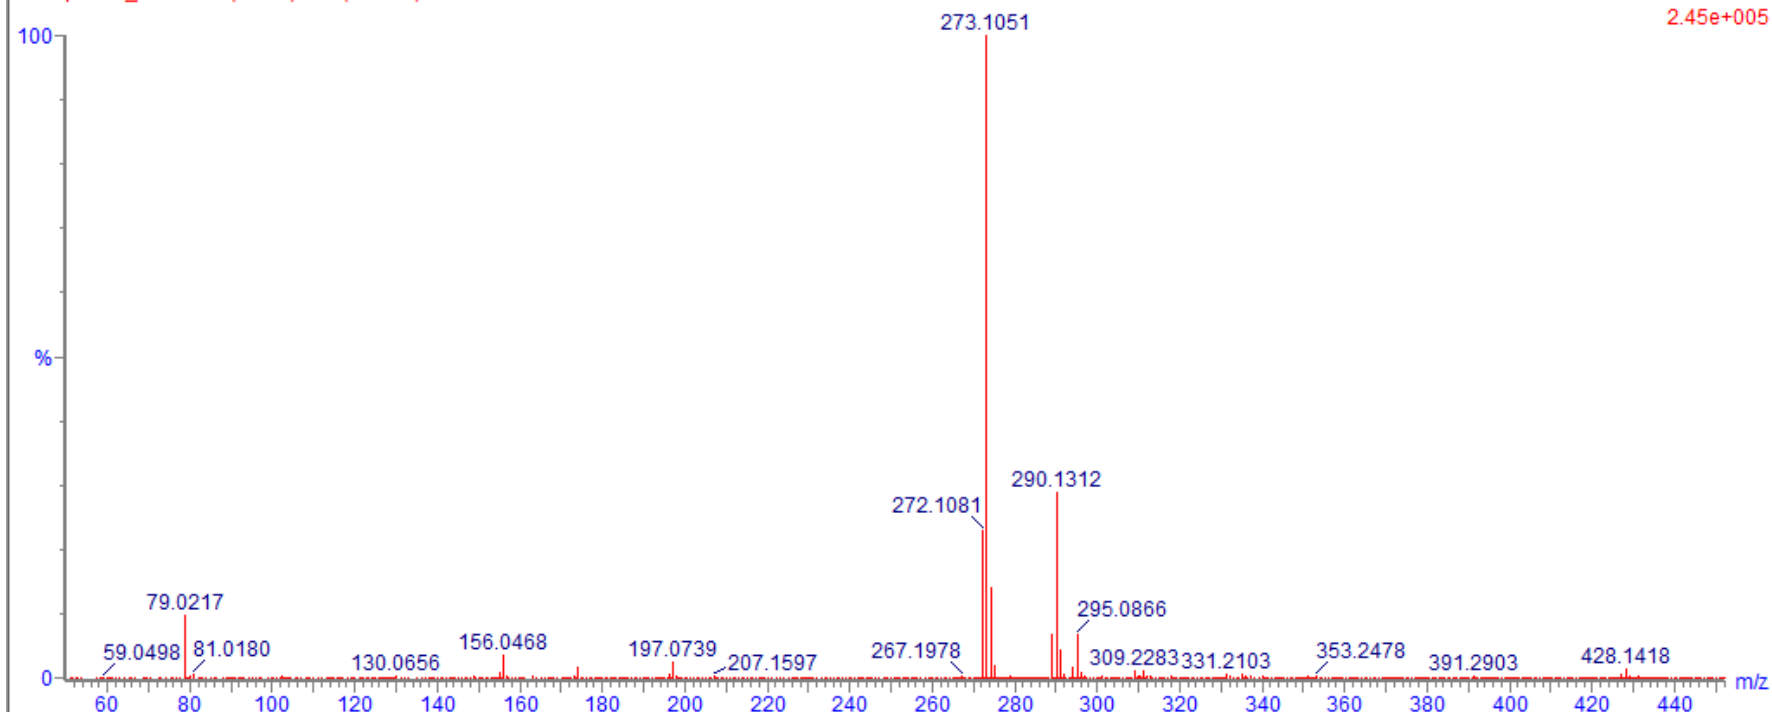

INTER034

29Sep2021\_IG22

1: TOF MS ES+  
273.105 0.0500Da  
9.46e4

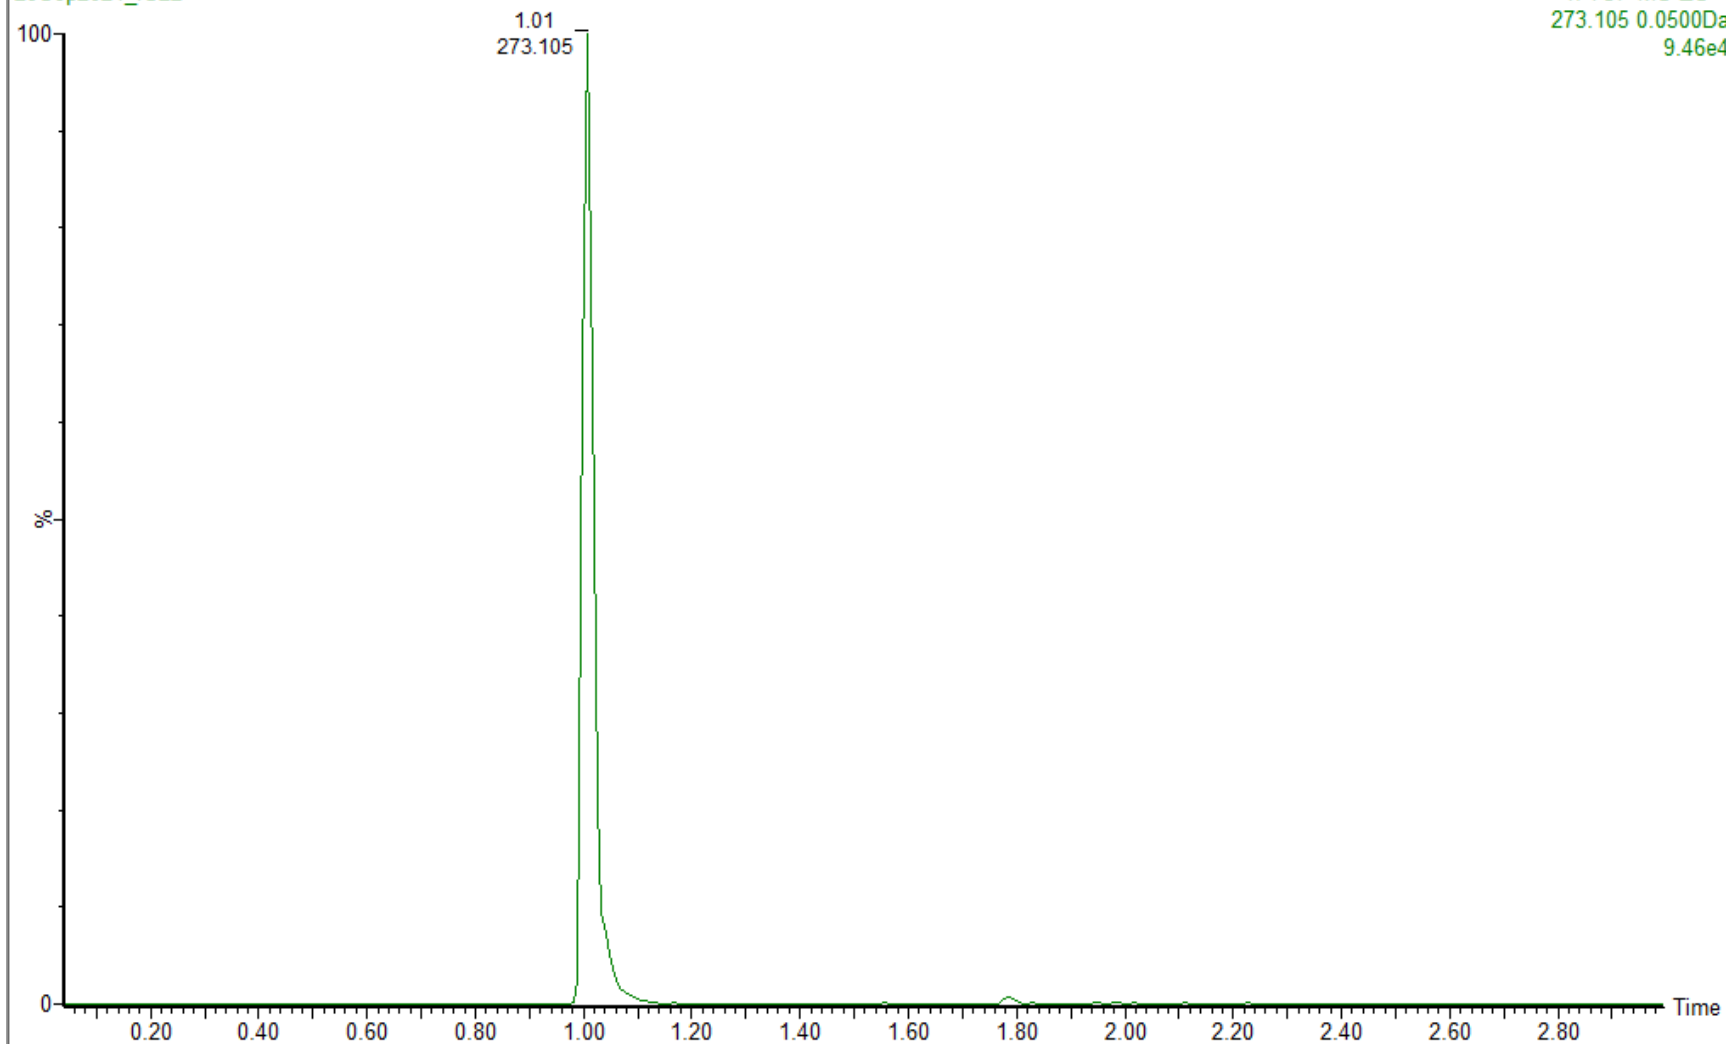

**6-Methyl-2-(1-methyl-3-(trifluoromethyl)-1H-pyrazol-5-yl)-1,3,6,2-dioxazaborocane-4,8-dione 13**

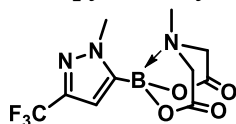

6-methyl-2-(1-methyl-3-(trifluoromethyl)-1*H*-pyrazol-5-yl)-1,3,6,2-dioxazaborocane-4,8-dione

Chemical Formula: C<sub>10</sub>H<sub>11</sub>BF<sub>3</sub>N<sub>3</sub>O<sub>4</sub>

Molecular Weight: 305.0182

Yield = 21.0 mg (7%).

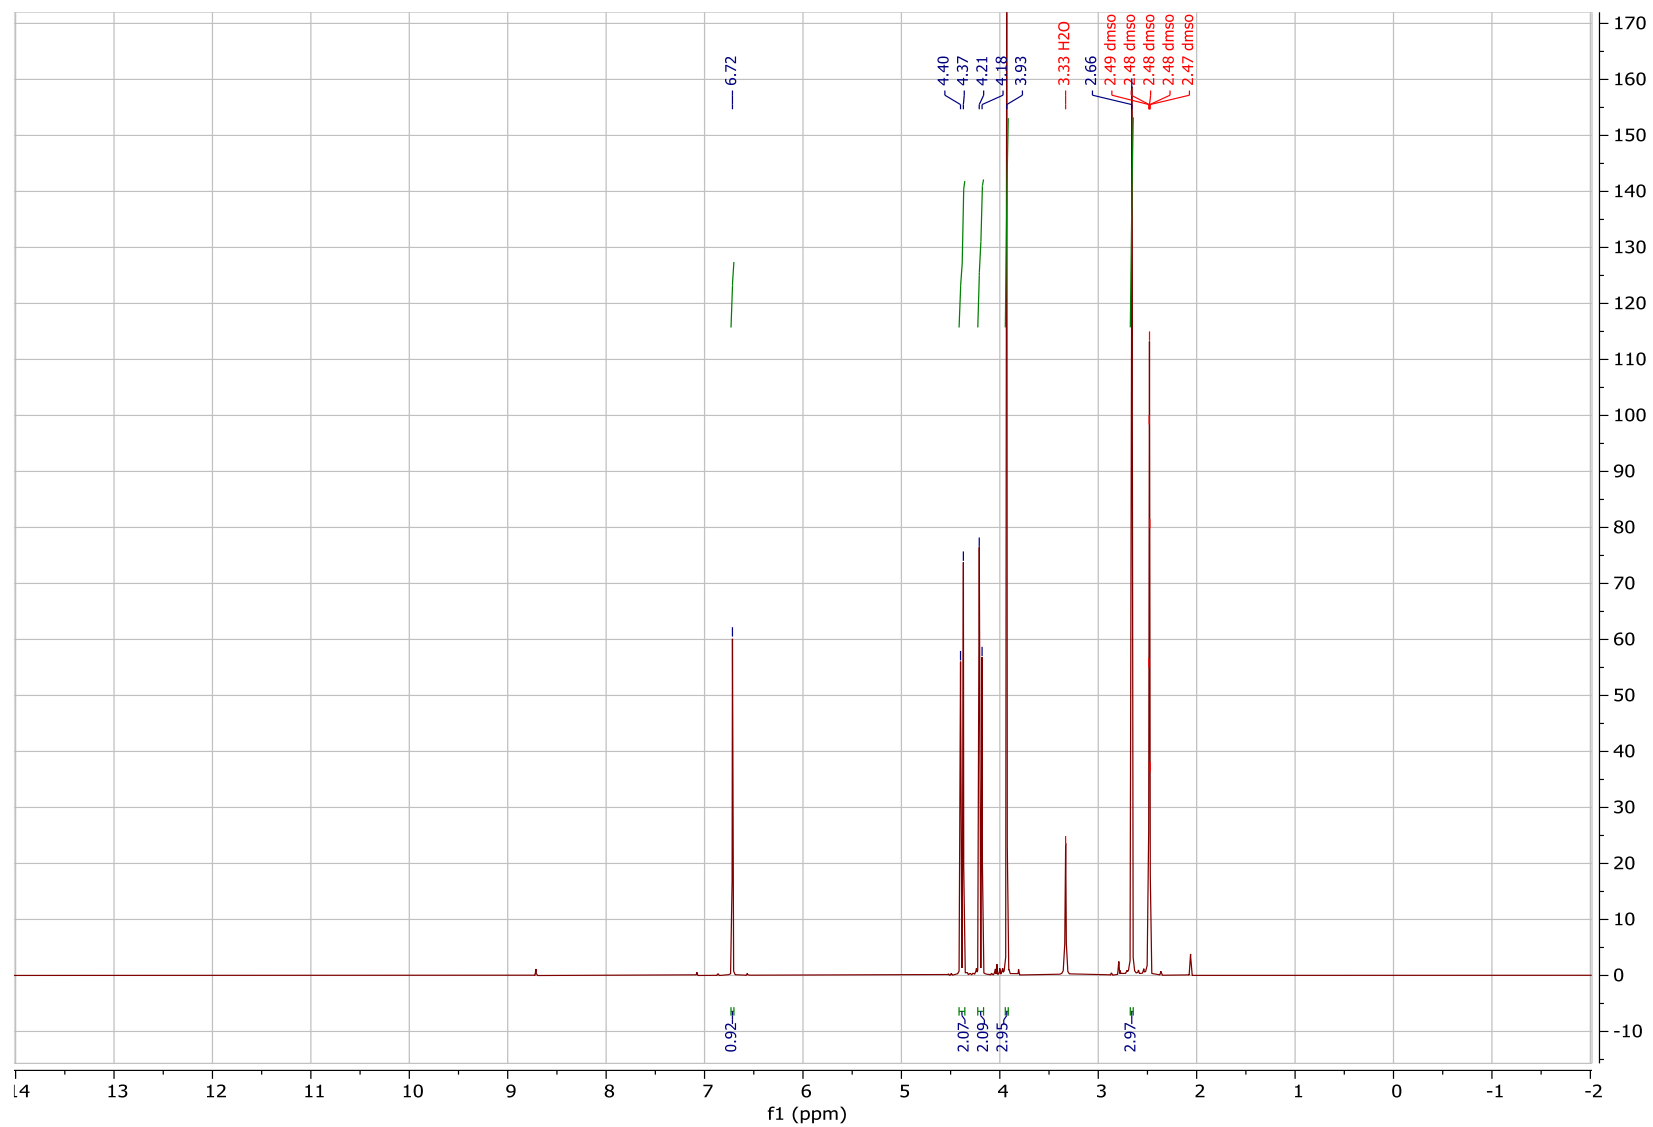

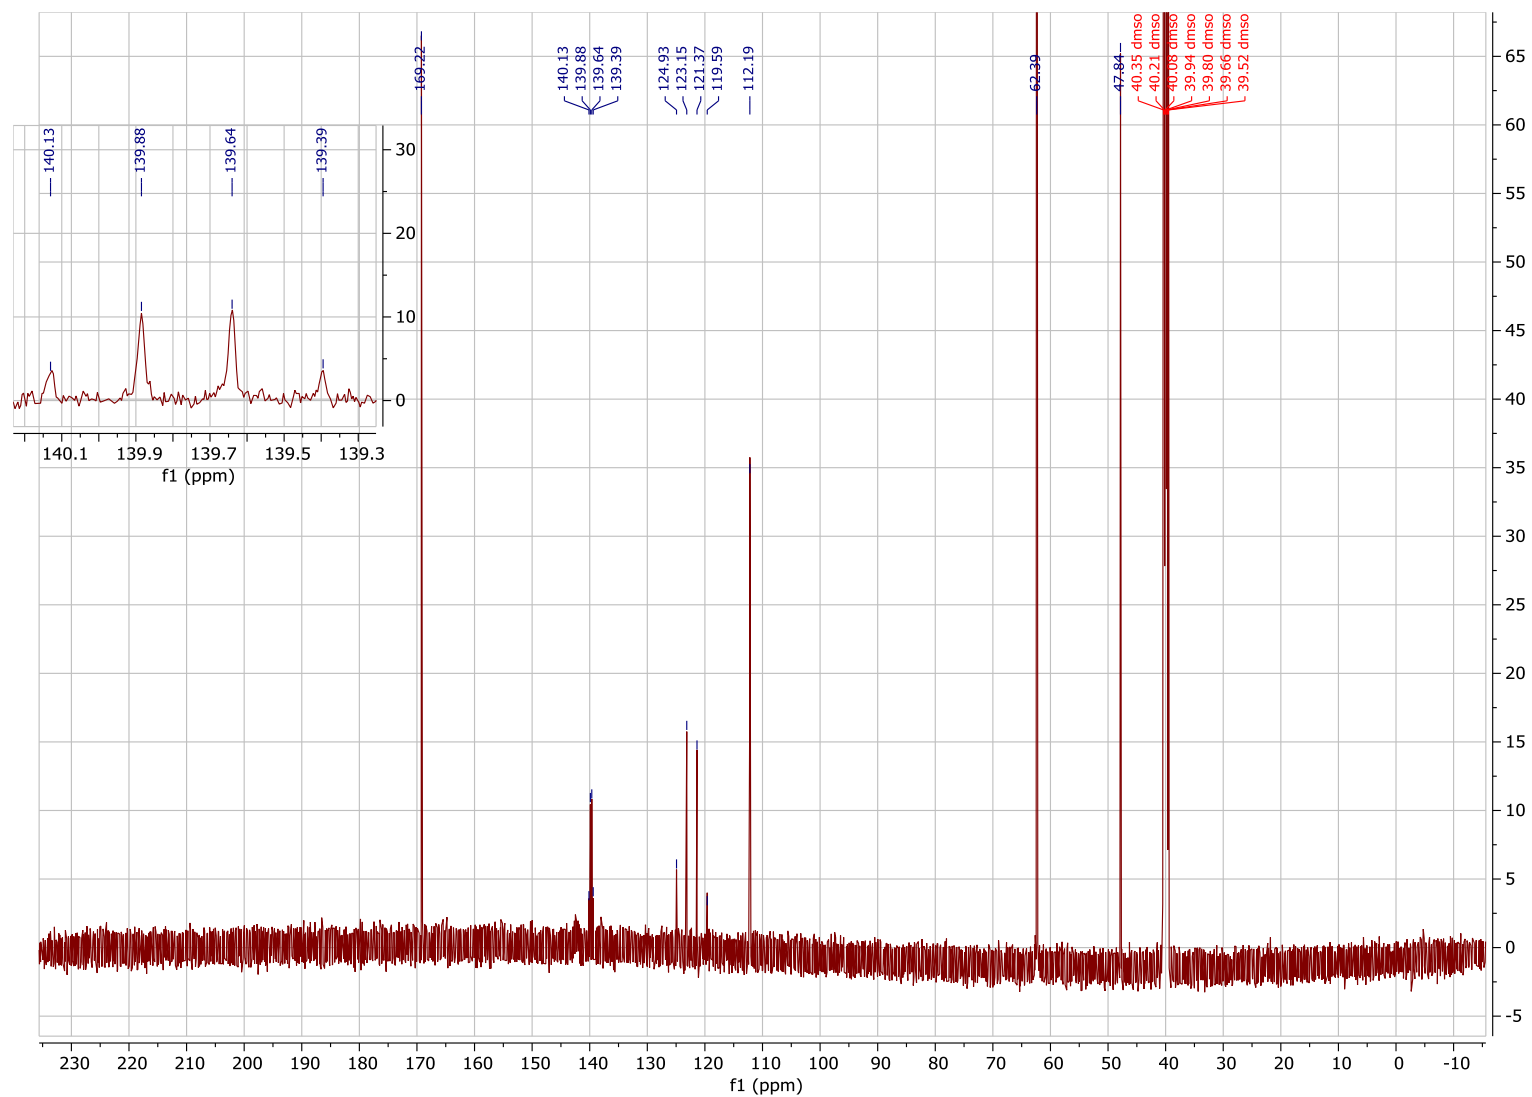

### Single Mass Analysis

Tolerance = 5.0 mDa / DBE: min = -1.5, max = 120.0

Element prediction: Off

Number of isotope peaks used for i-FIT = 3

Monoisotopic Mass, Even Electron Ions

306 formula(e) evaluated with 1 results within limits (up to 20 best isotopic matches for each mass)

Elements Used:

| Mass     | Calc. Mass | mDa | PPM | DBE | Formula              | i-FIT | i-FIT Norm | Fit Conf % | C  | H  | 11B | N | O | 23Na | F |
|----------|------------|-----|-----|-----|----------------------|-------|------------|------------|----|----|-----|---|---|------|---|
| 306.0875 | 306.0873   | 0.2 | 0.7 | 5.5 | C10 H12 11B N3 O4 F3 | 169.5 | n/a        | n/a        | 10 | 12 | 1   | 3 | 4 |      | 3 |

INTER052

29Sep2021\_IG48 105 (1.051) Cm (104:108)

1: TOF MS ES+  
3.87e+004

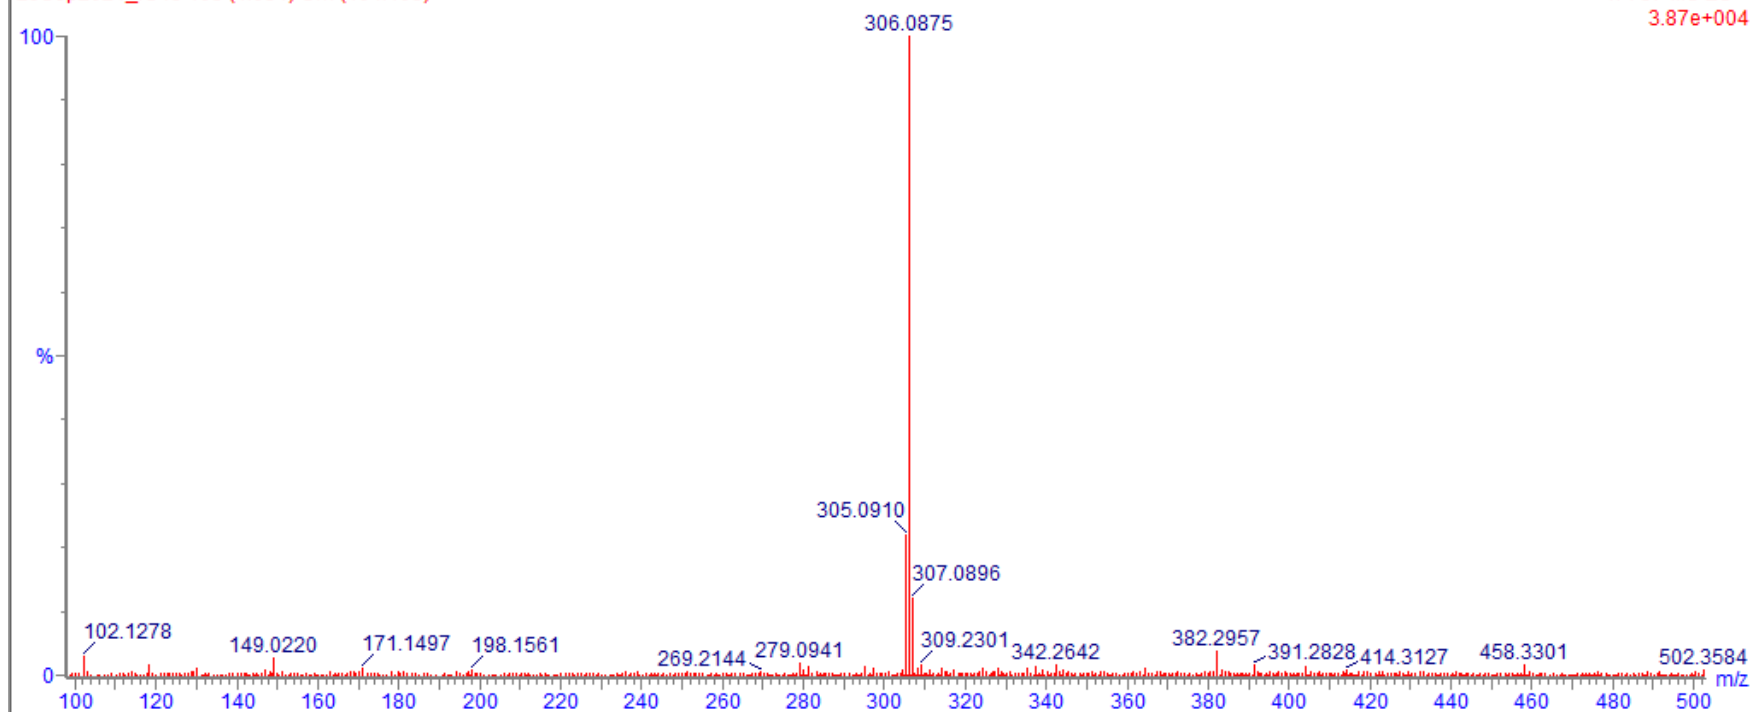



INTER052

29Sep2021\_IG48

1: TOF MS ES+  
306.088 0.0500Da  
1.29e4

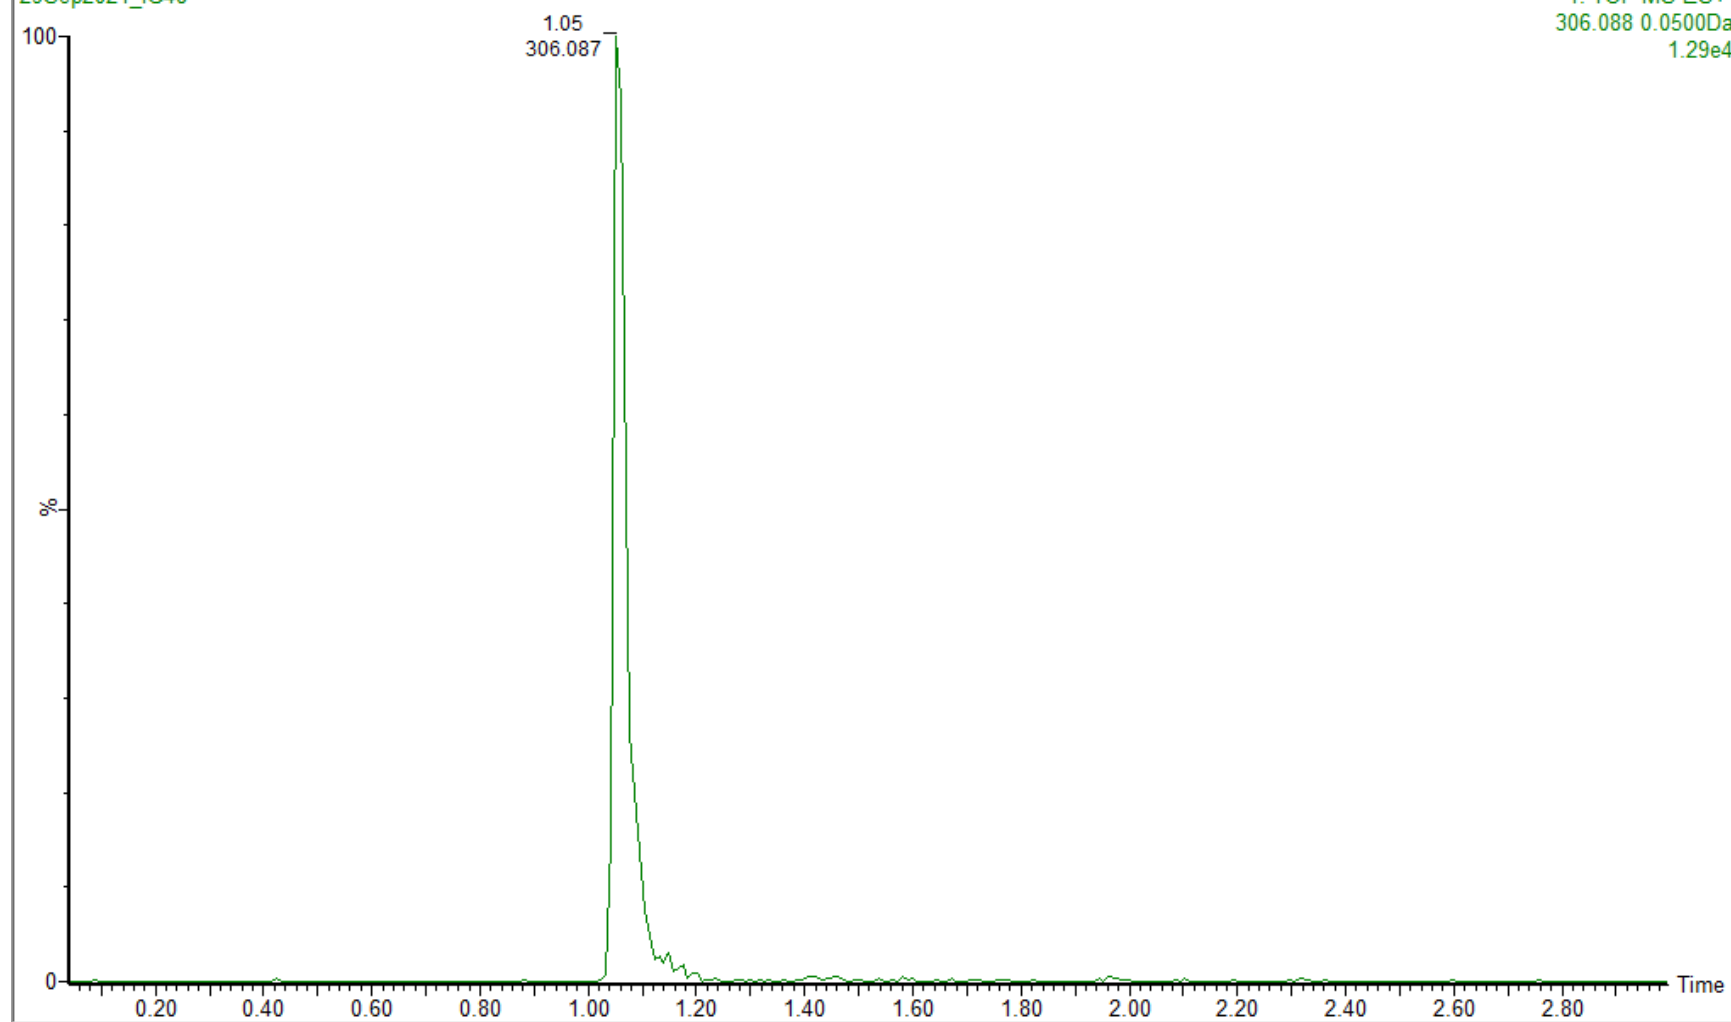

**2-(Benzo[d][1,3]dioxol-5-yl)-6-methyl-1,3,6,2-dioxazaborocane-4,8-dione 14**

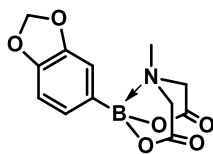

2-(benzo[d][1,3]dioxol-5-yl)-6-methyl-1,3,6,2-dioxazaborocane-4,8-dione

Chemical Formula:  $C_{12}H_{12}BNO_6$

Molecular Weight: 277.0378

Yield = 199.1 mg (71%).

PROTON\_01  
AEPD-0072-2a

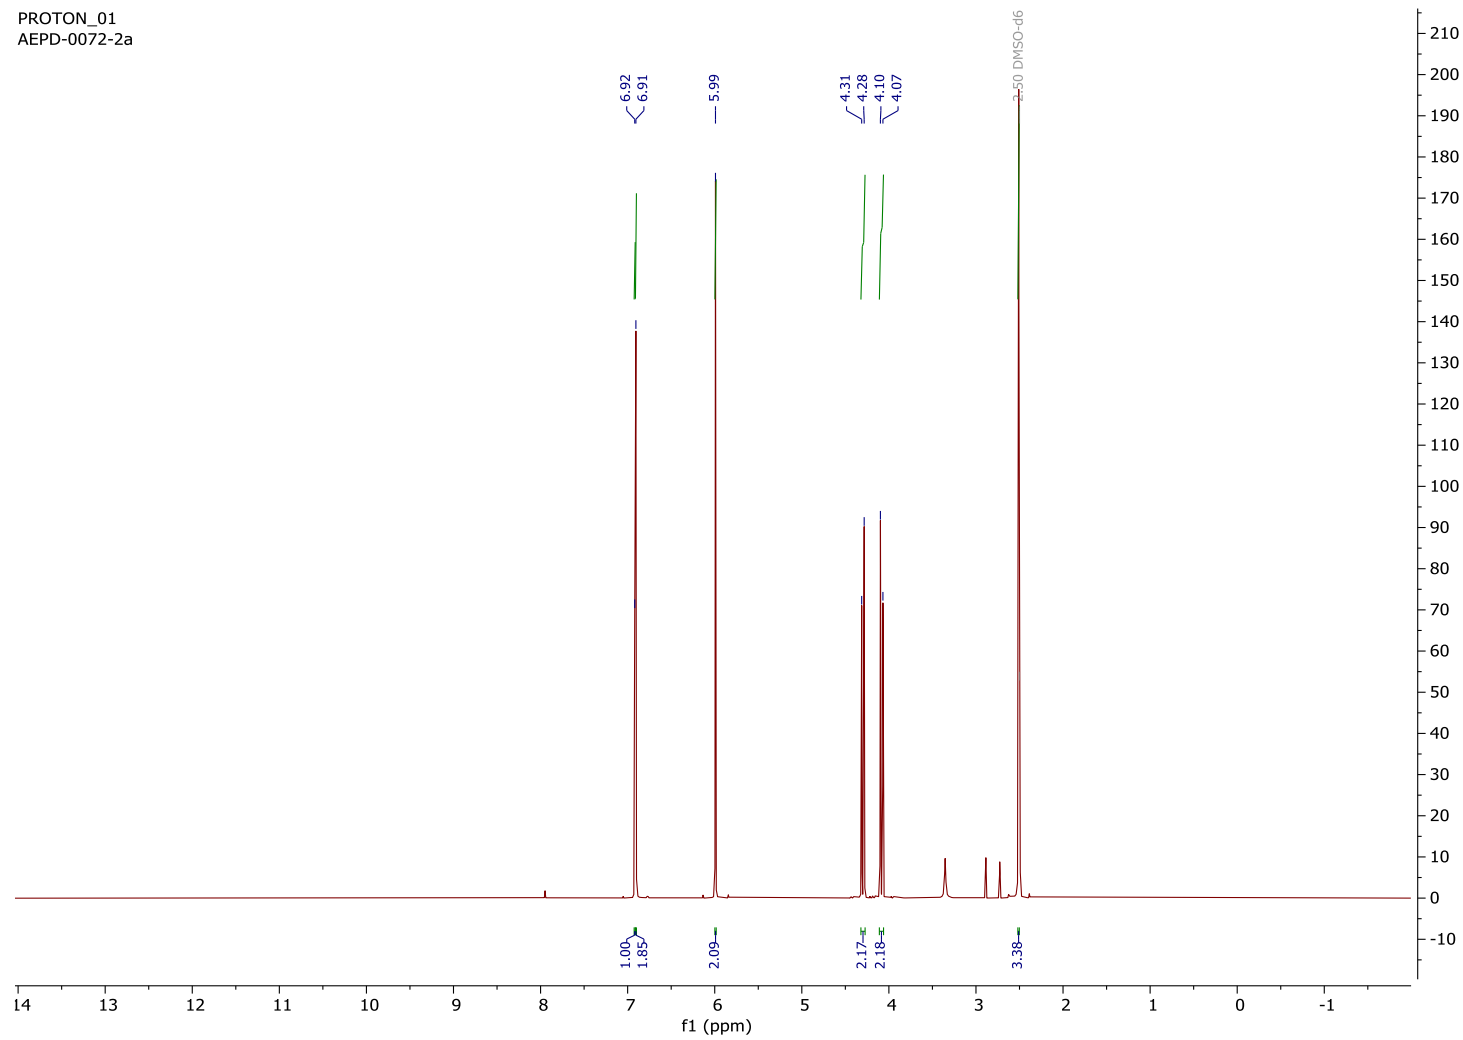

CARBON\_01  
AEPD-0072-2a

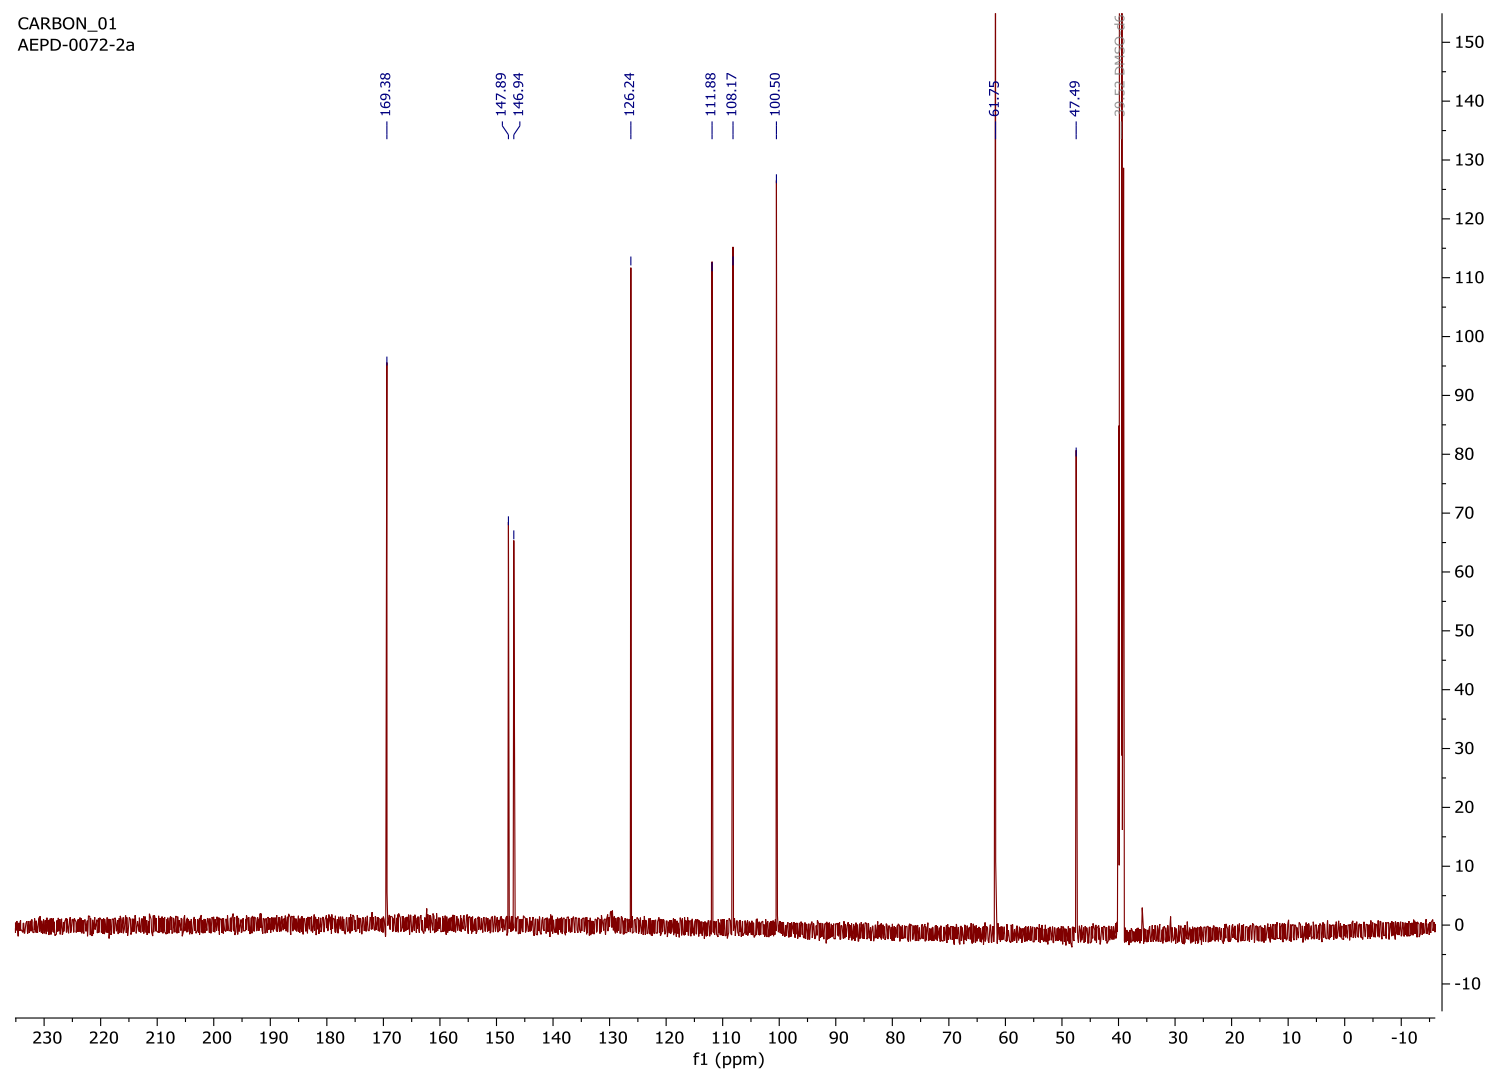

AEPD-0072

29Sep2021\_IG20 97 (0.981)

1: TOF MS ES+  
3.24e4

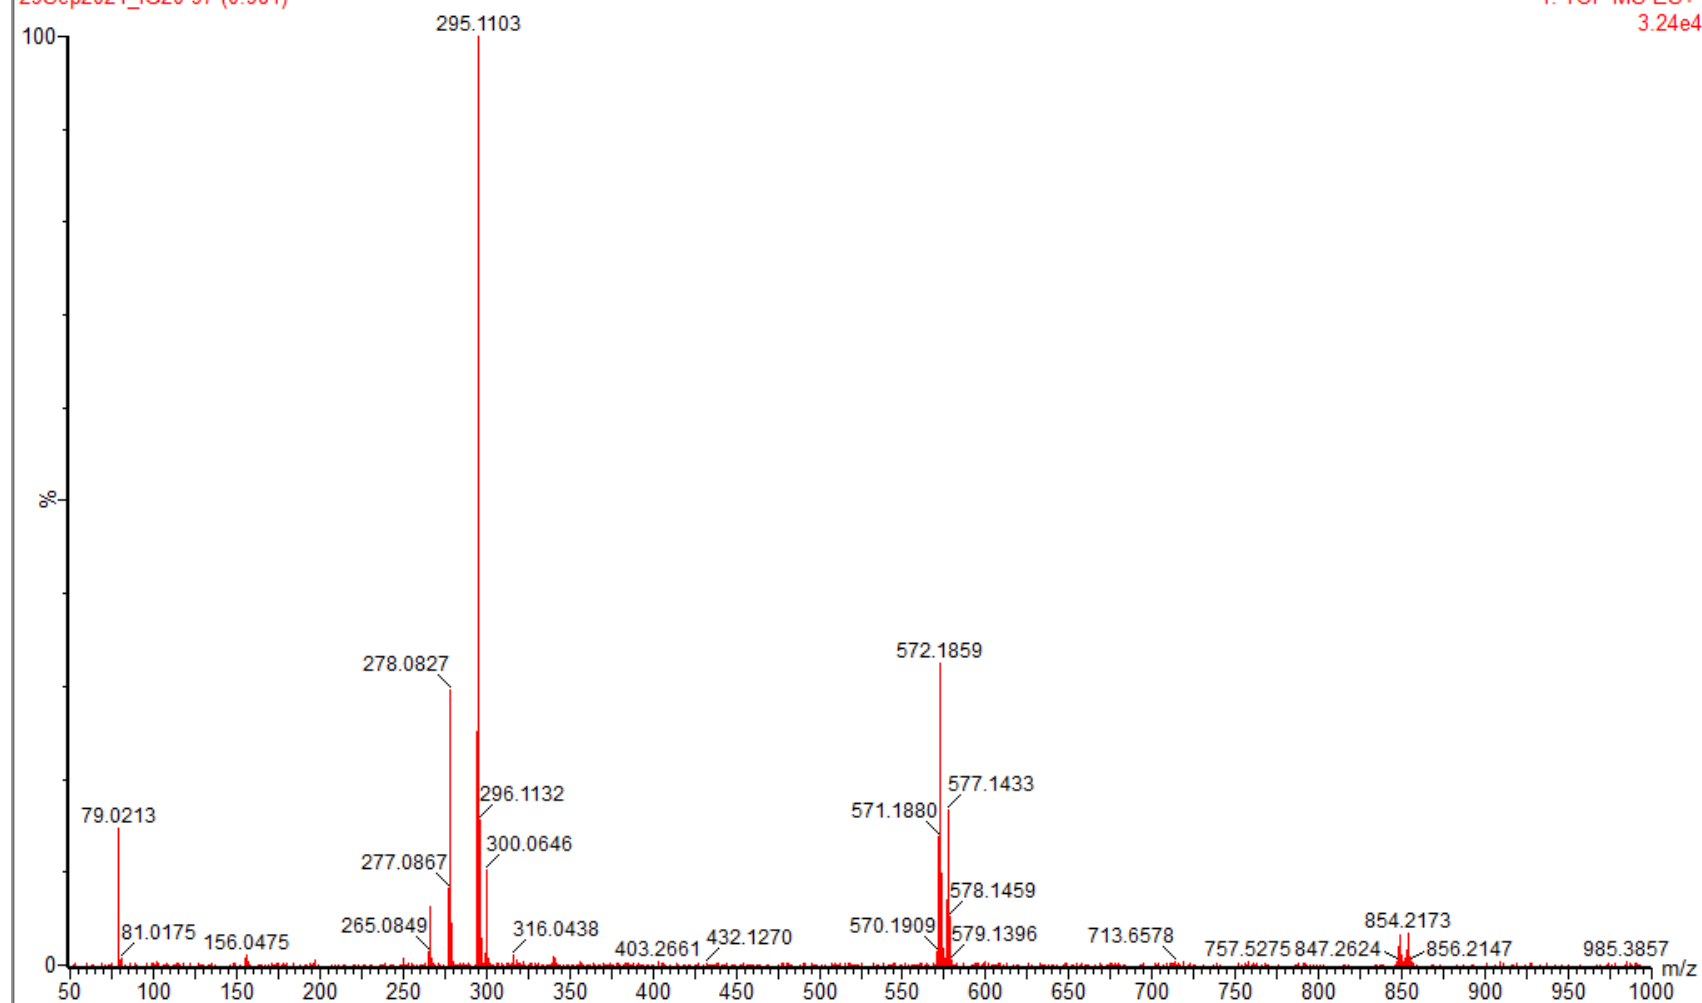

AEPD-0072

29Sep2021\_IG20

1: TOF MS ES+  
295.111 0.0500Da  
3.24e4

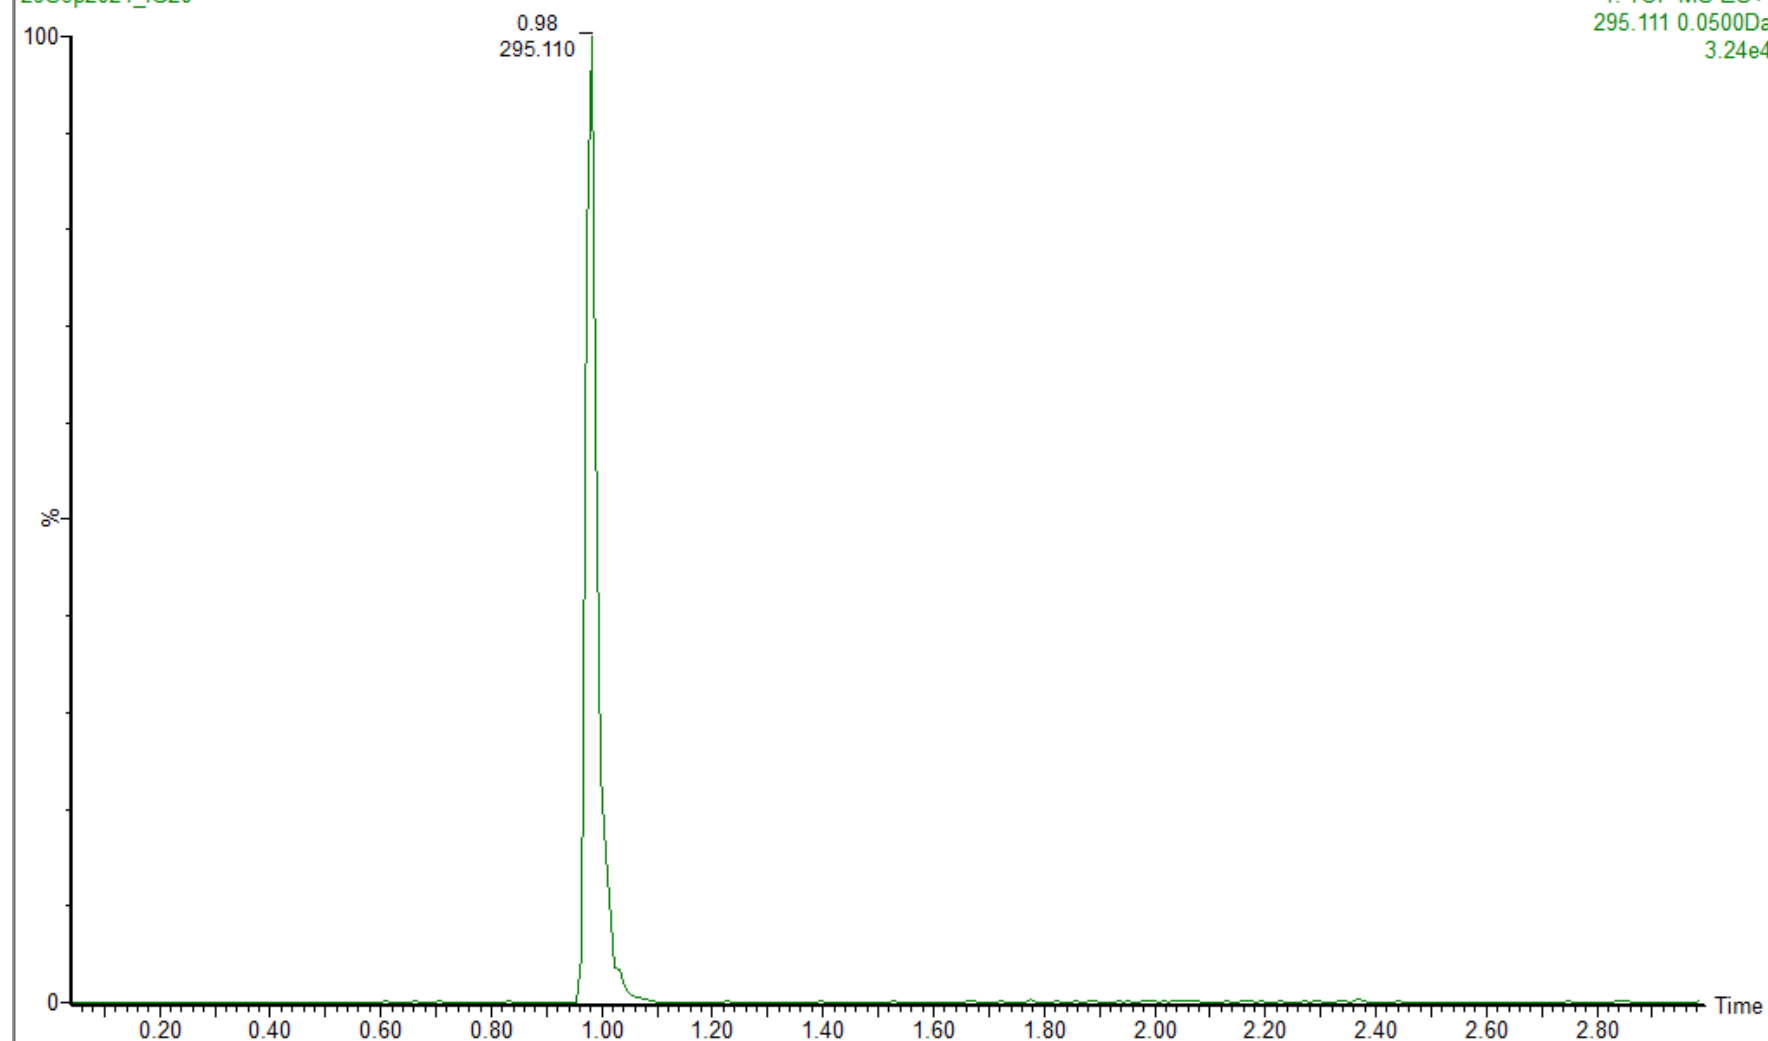

2-(3-ethoxyphenyl)-6-methyl-1,3,6,2-dioxazaborocane-4,8-dione 8c

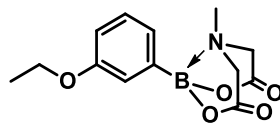

2-(3-ethoxyphenyl)-6-methyl-1,3,6,2-dioxazaborocane-4,8-dione

Chemical Formula:  $C_{13}H_{16}BNO_5$

Molecular Weight: 277.0808

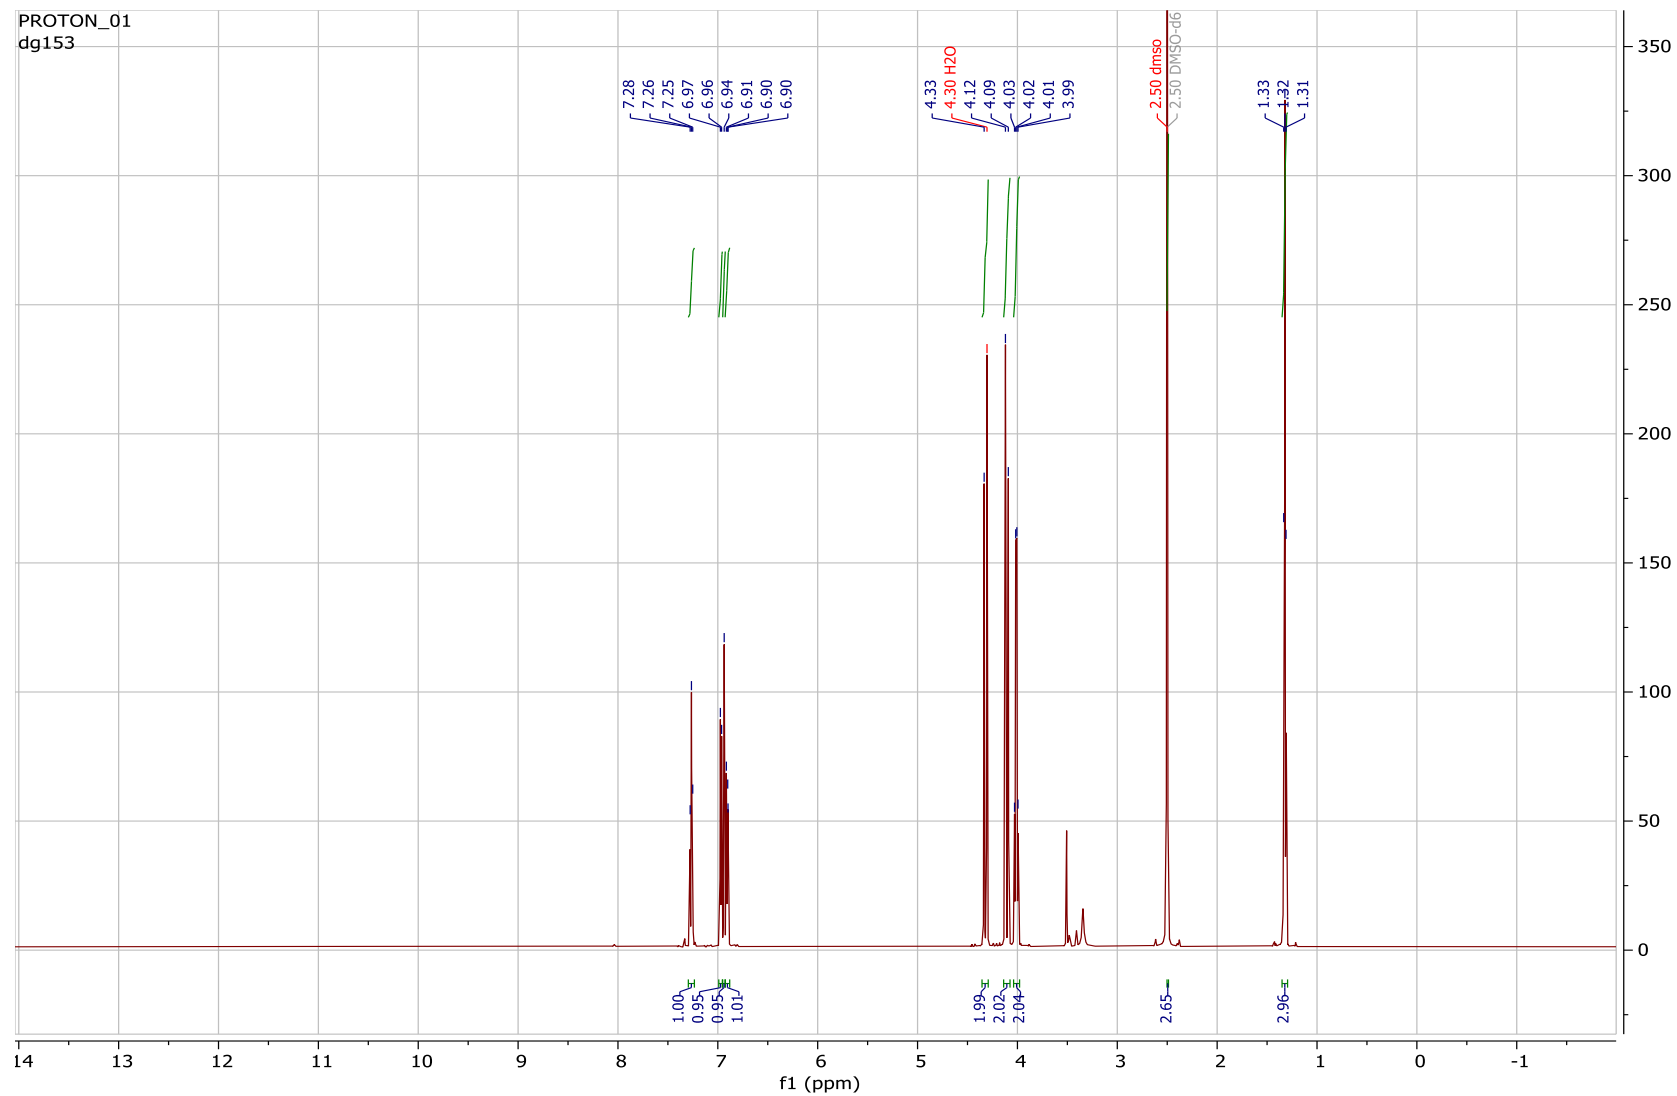



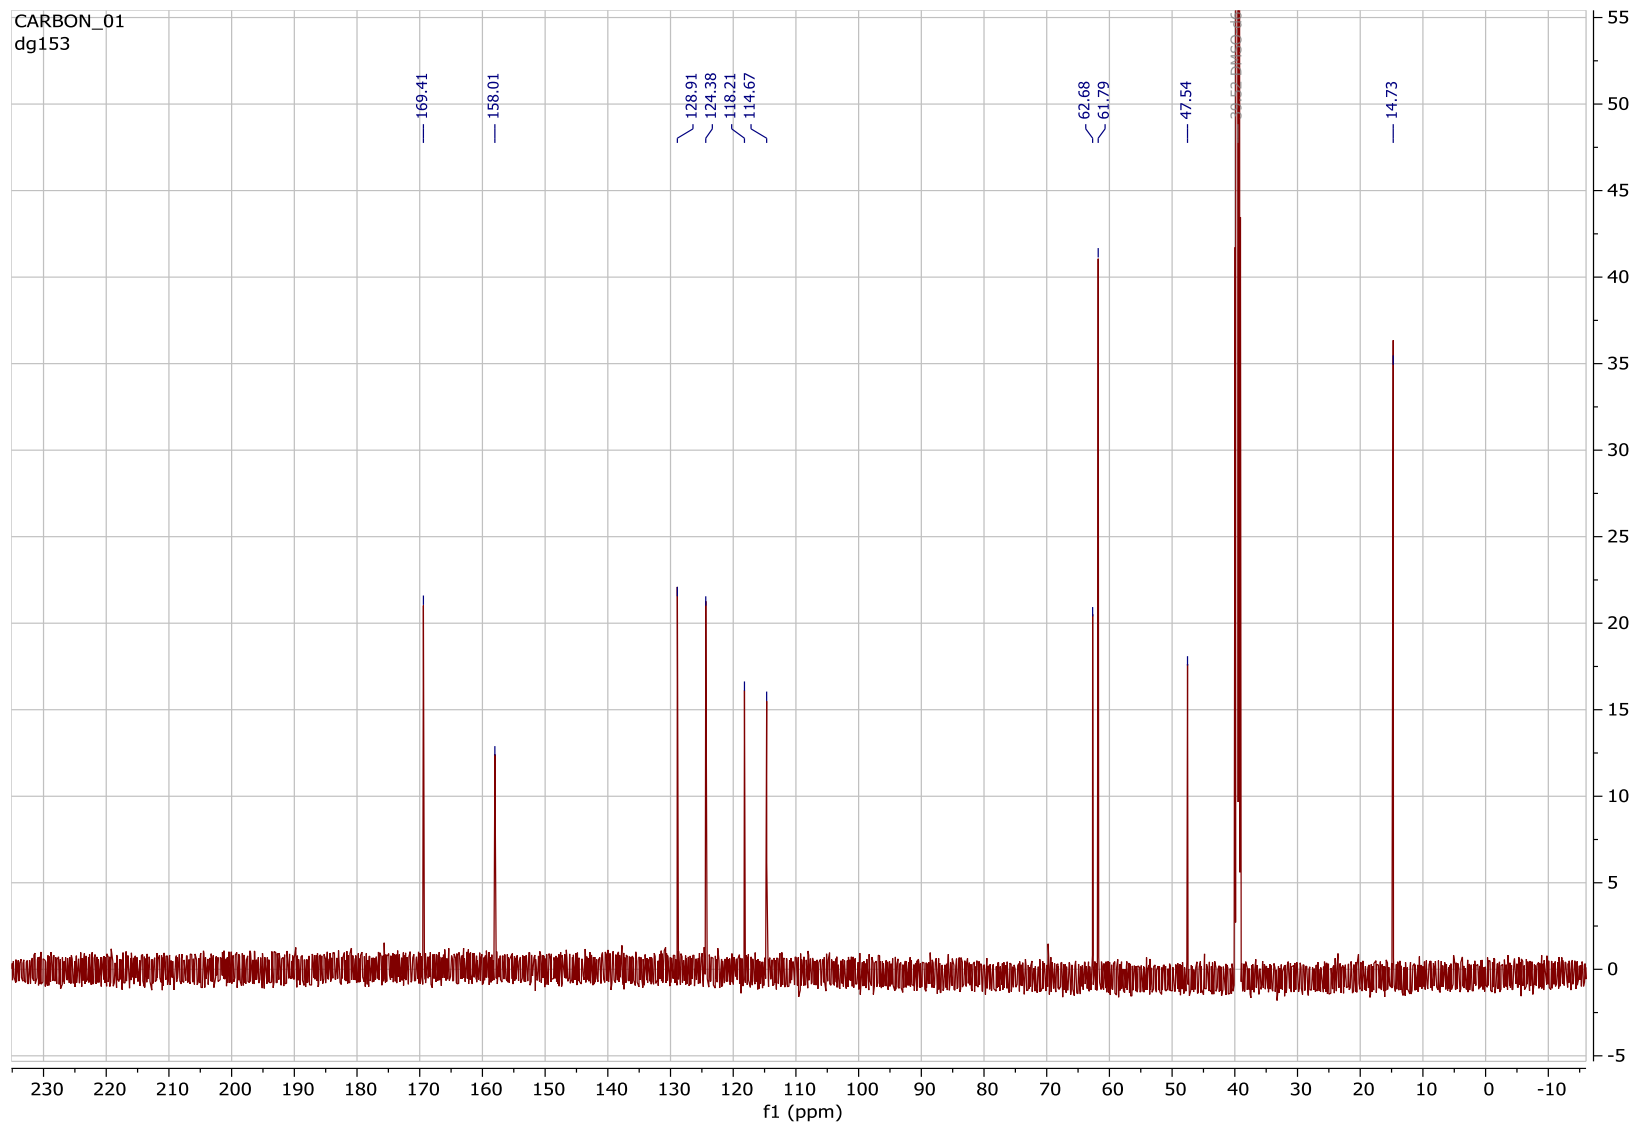

DG153

20Dec2021\_IG06 109 (1.105) Cm (109:116)

1: TOF MS ES+  
1.43e5

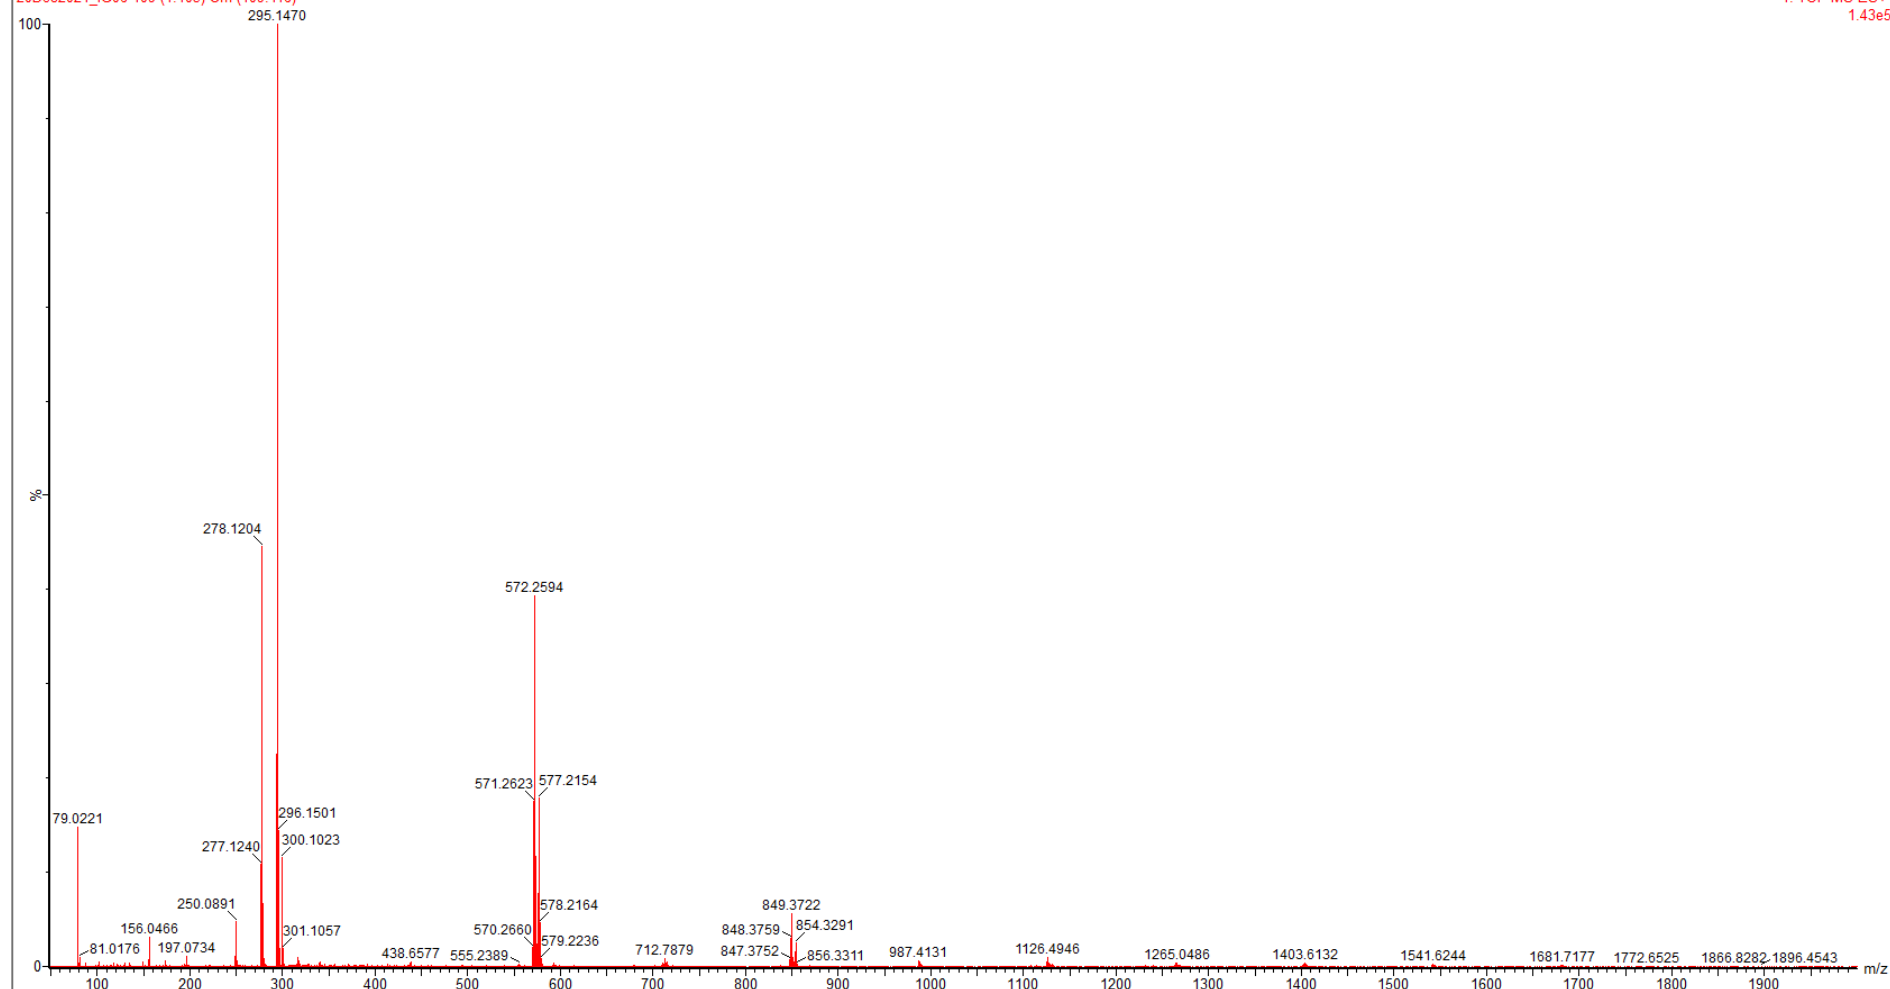

DG153

20Dec2021\_IG06

1: TOF MS ES+  
278.12 0.1000Da  
2.53e4

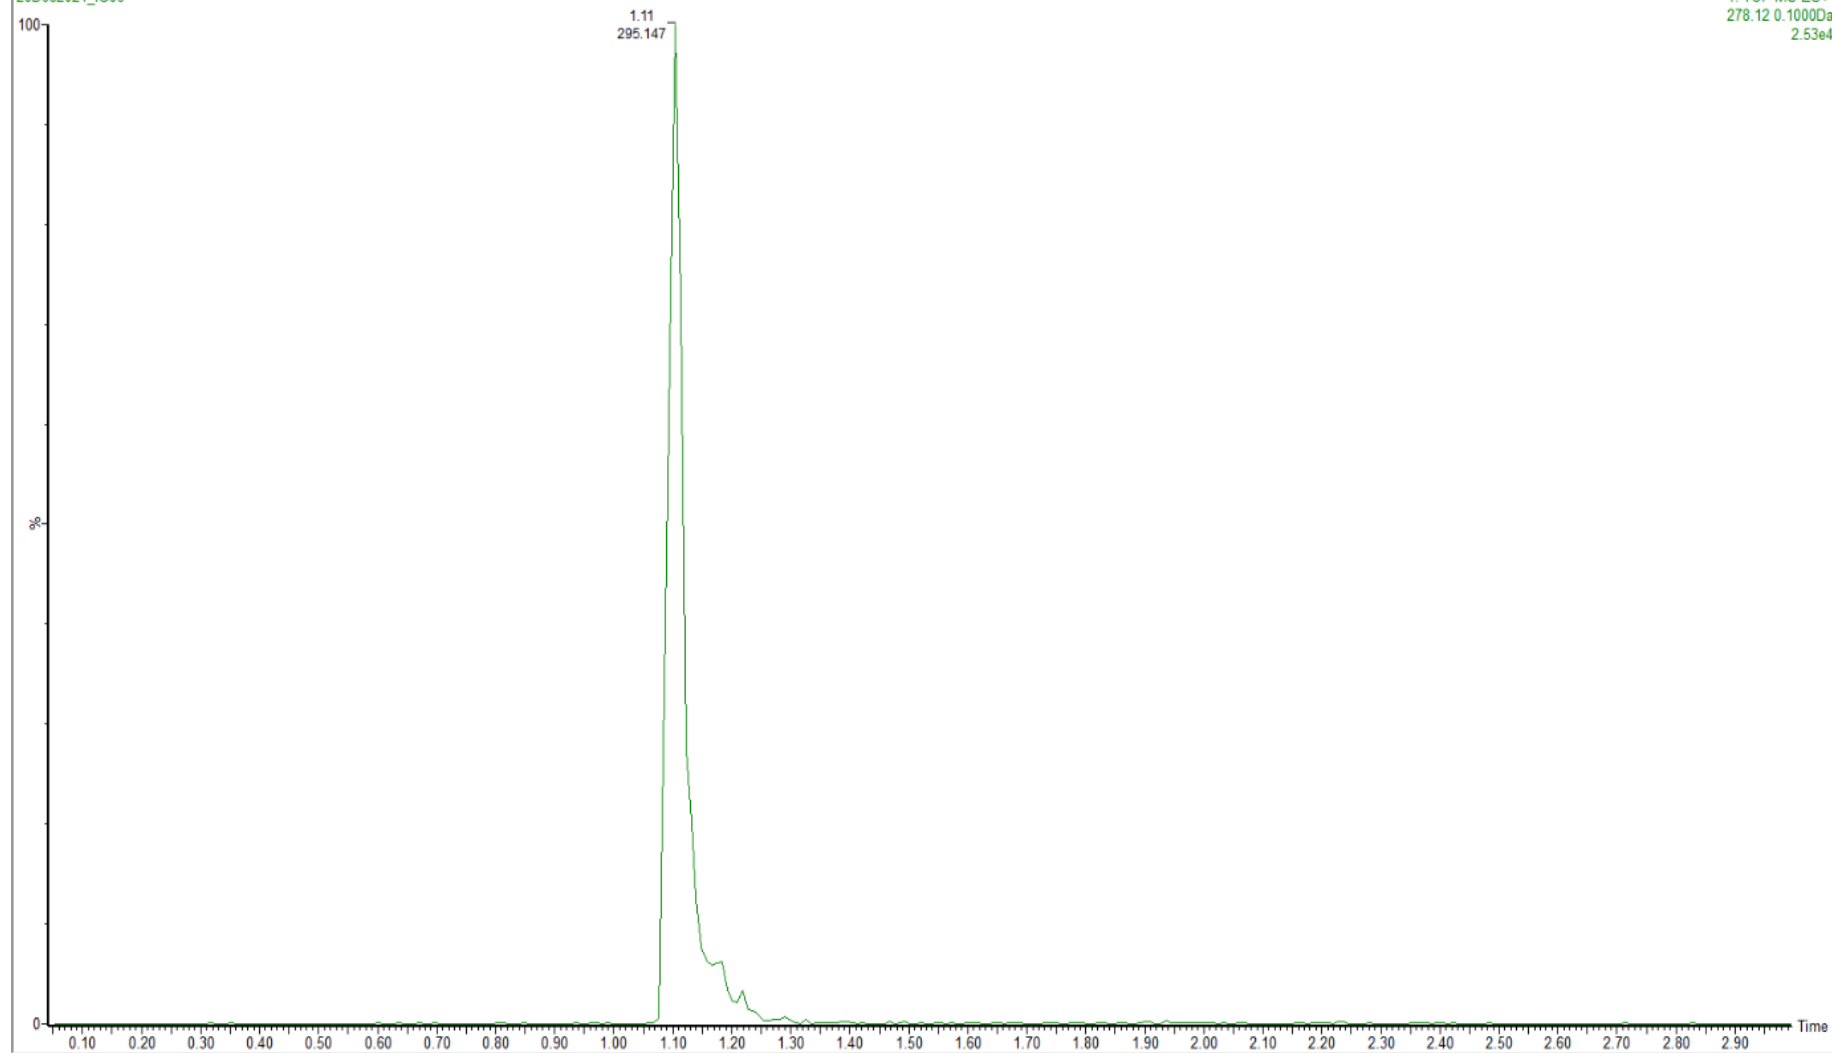

**Methyl 4-(6-methyl-4,8-dioxo-1,3,6,2-dioxazaborocan-2-yl)benzoate 8d**

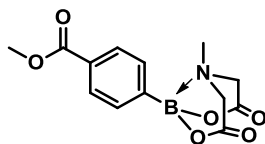

methyl 4-(6-methyl-4,8-dioxo-1,3,6,2-dioxazaborocan-2-yl)benzoate

Chemical Formula:  $C_{13}H_{14}BNO_6$

Molecular Weight: 291.0644

Yield = 193.0 mg (67%).

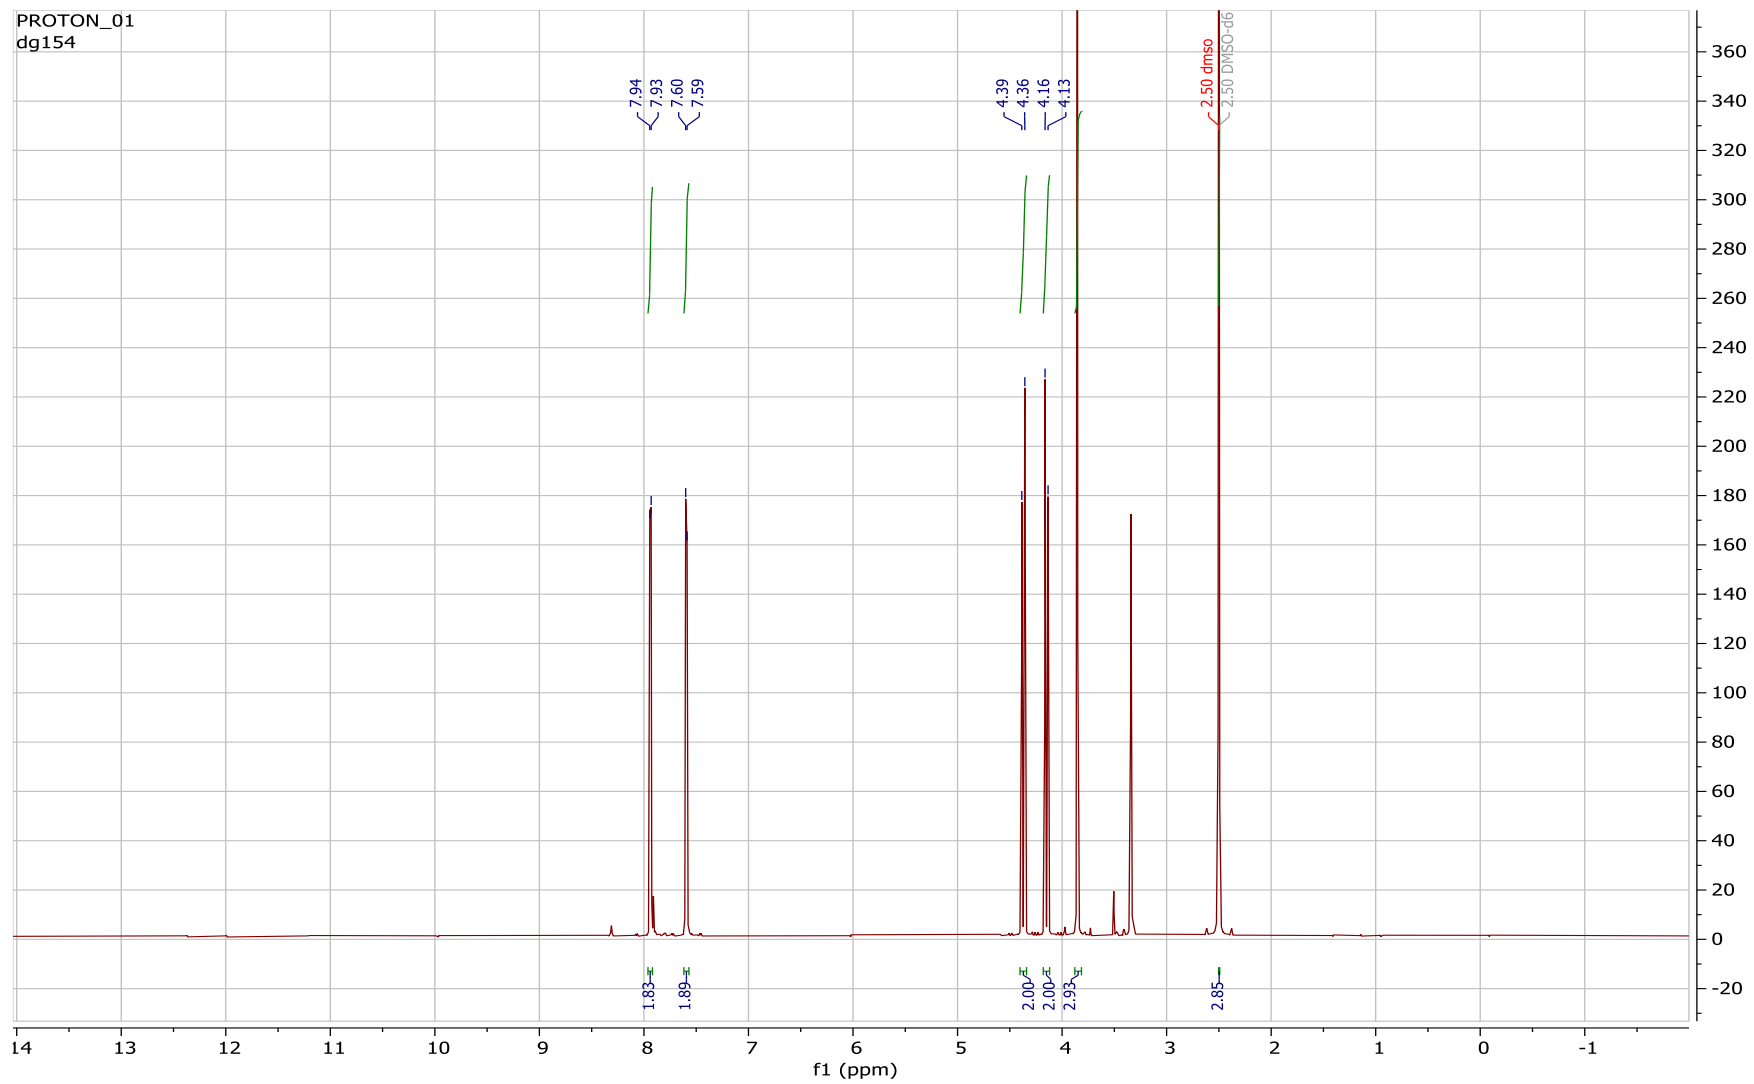

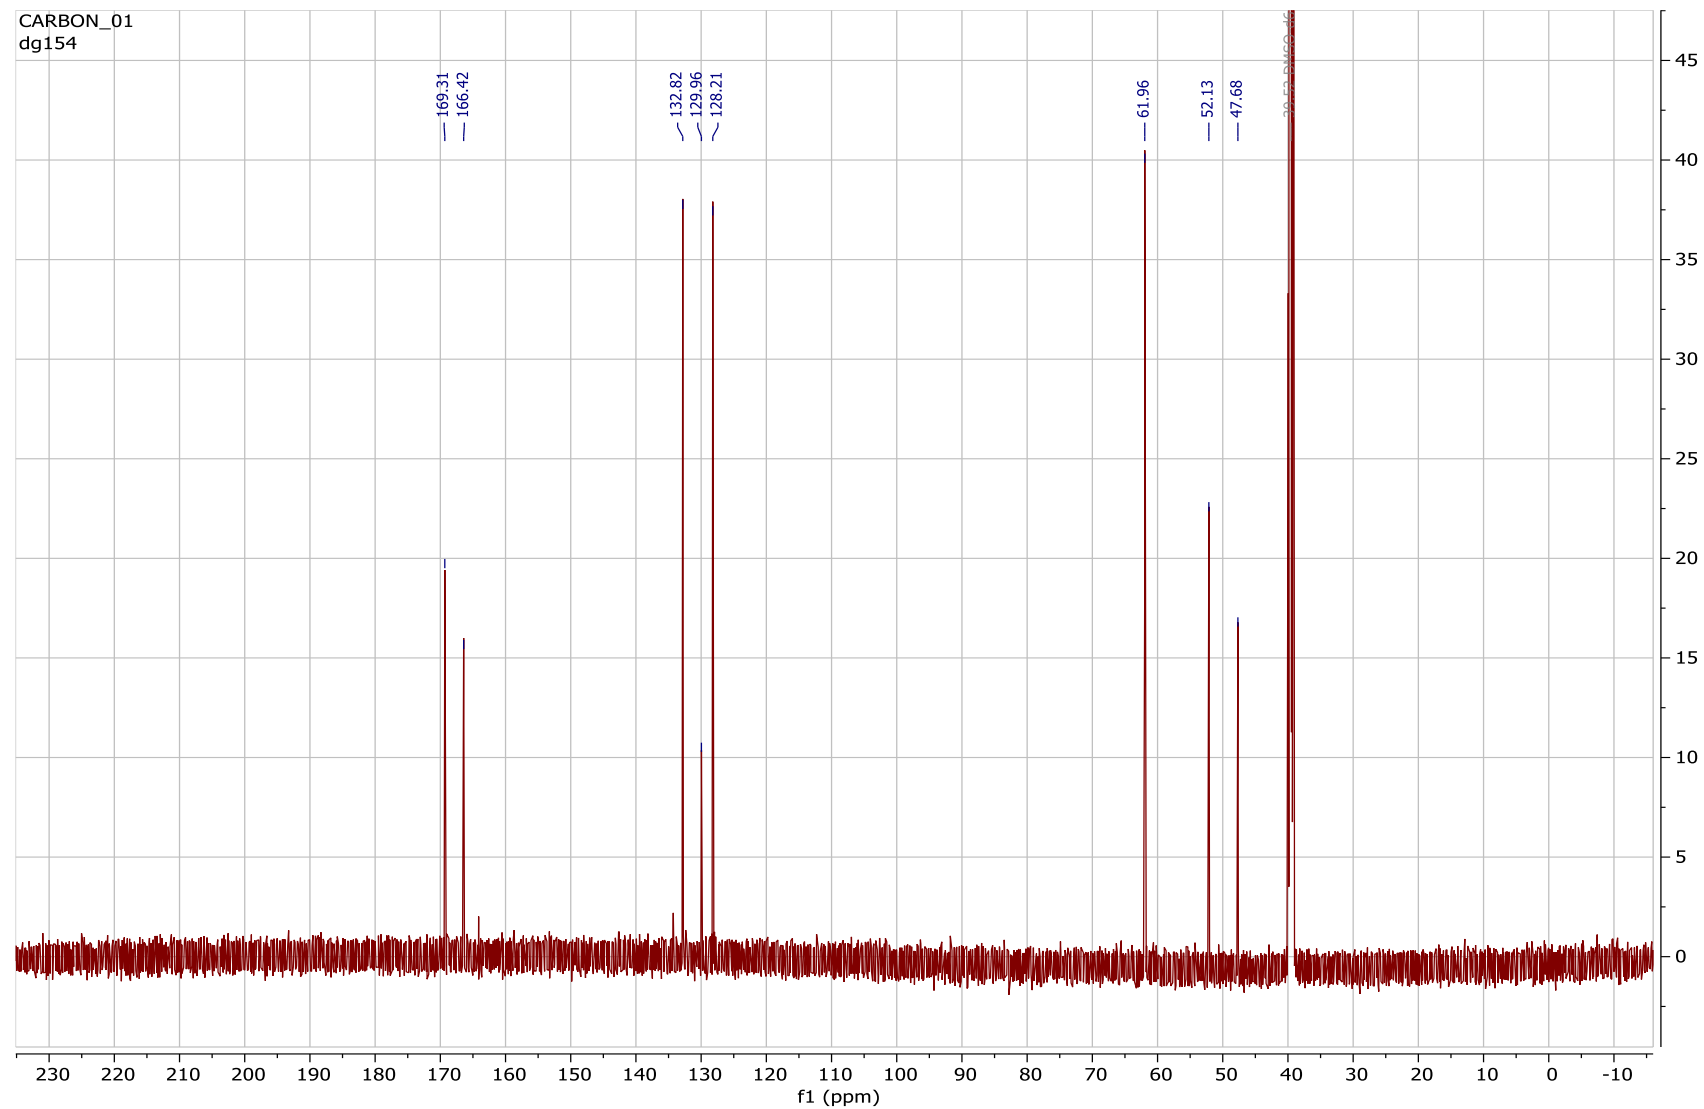

DG154

20Dec2021\_IG08 102 (1.024) Cm (100:108-2.85)

1: TOF MS ES+  
5.37e4

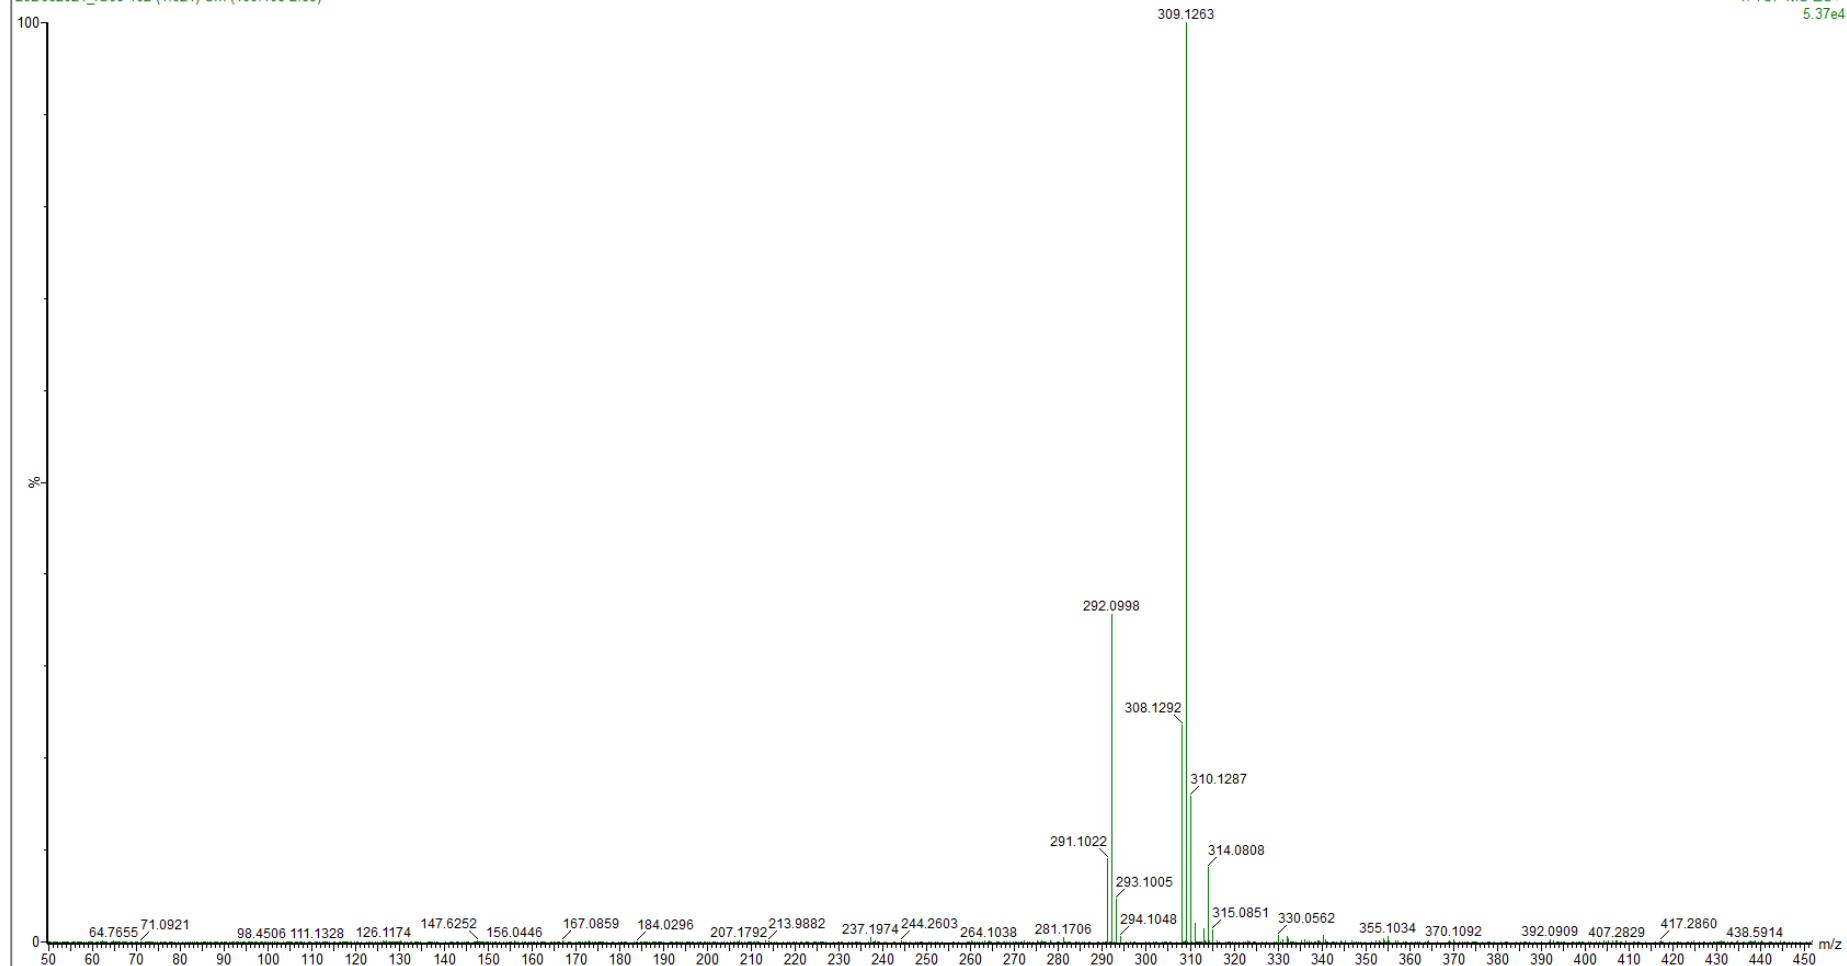

DG154

20Dec2021\_IG08

1: TOF MS ES+  
292.1 0.1000Da  
7.31e3

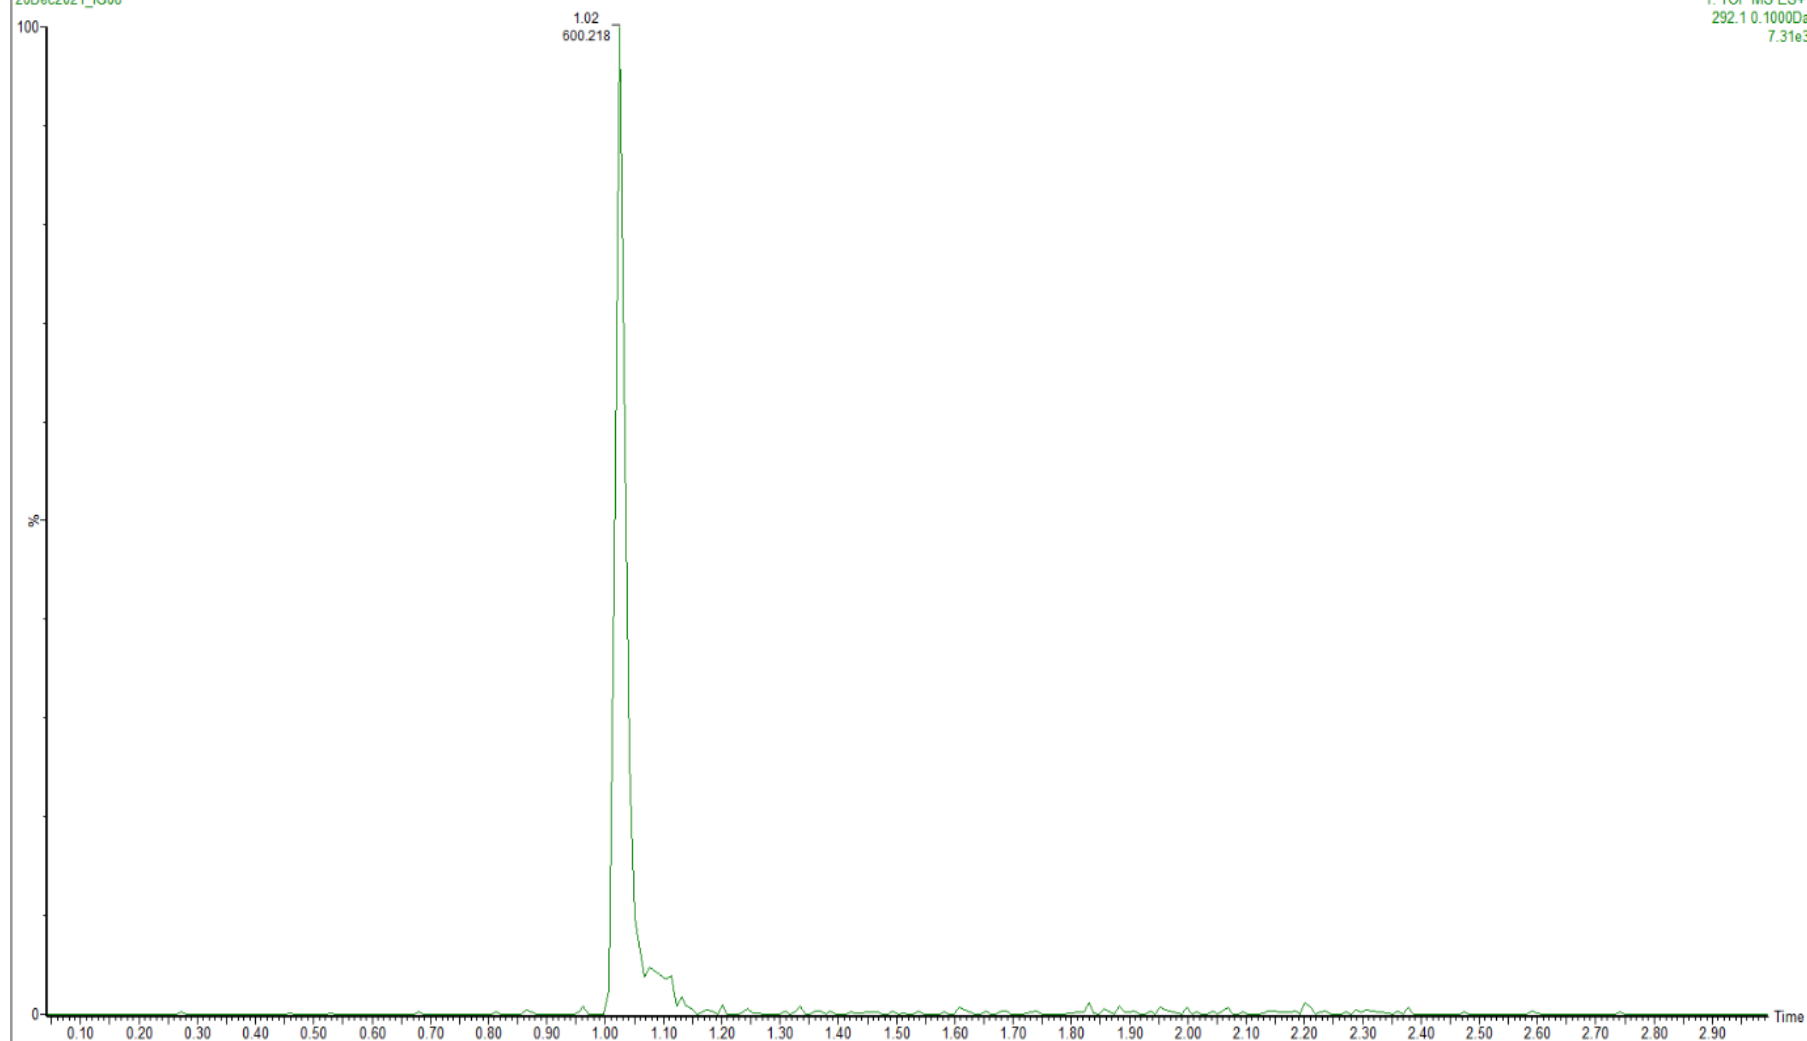



**2-([1,1'-biphenyl]-4-yl)-6-methyl-1,3,6,2-dioxazaborocane-4,8-dione 8l**

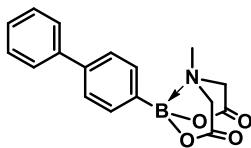

2-([1,1'-biphenyl]-4-yl)-6-methyl-1,3,6,2-dioxazaborocane-4,8-dione

Chemical Formula:  $C_{17}H_{16}BNO_4$

Molecular Weight: 309.1242

Yield = 309.0 mg (99%).

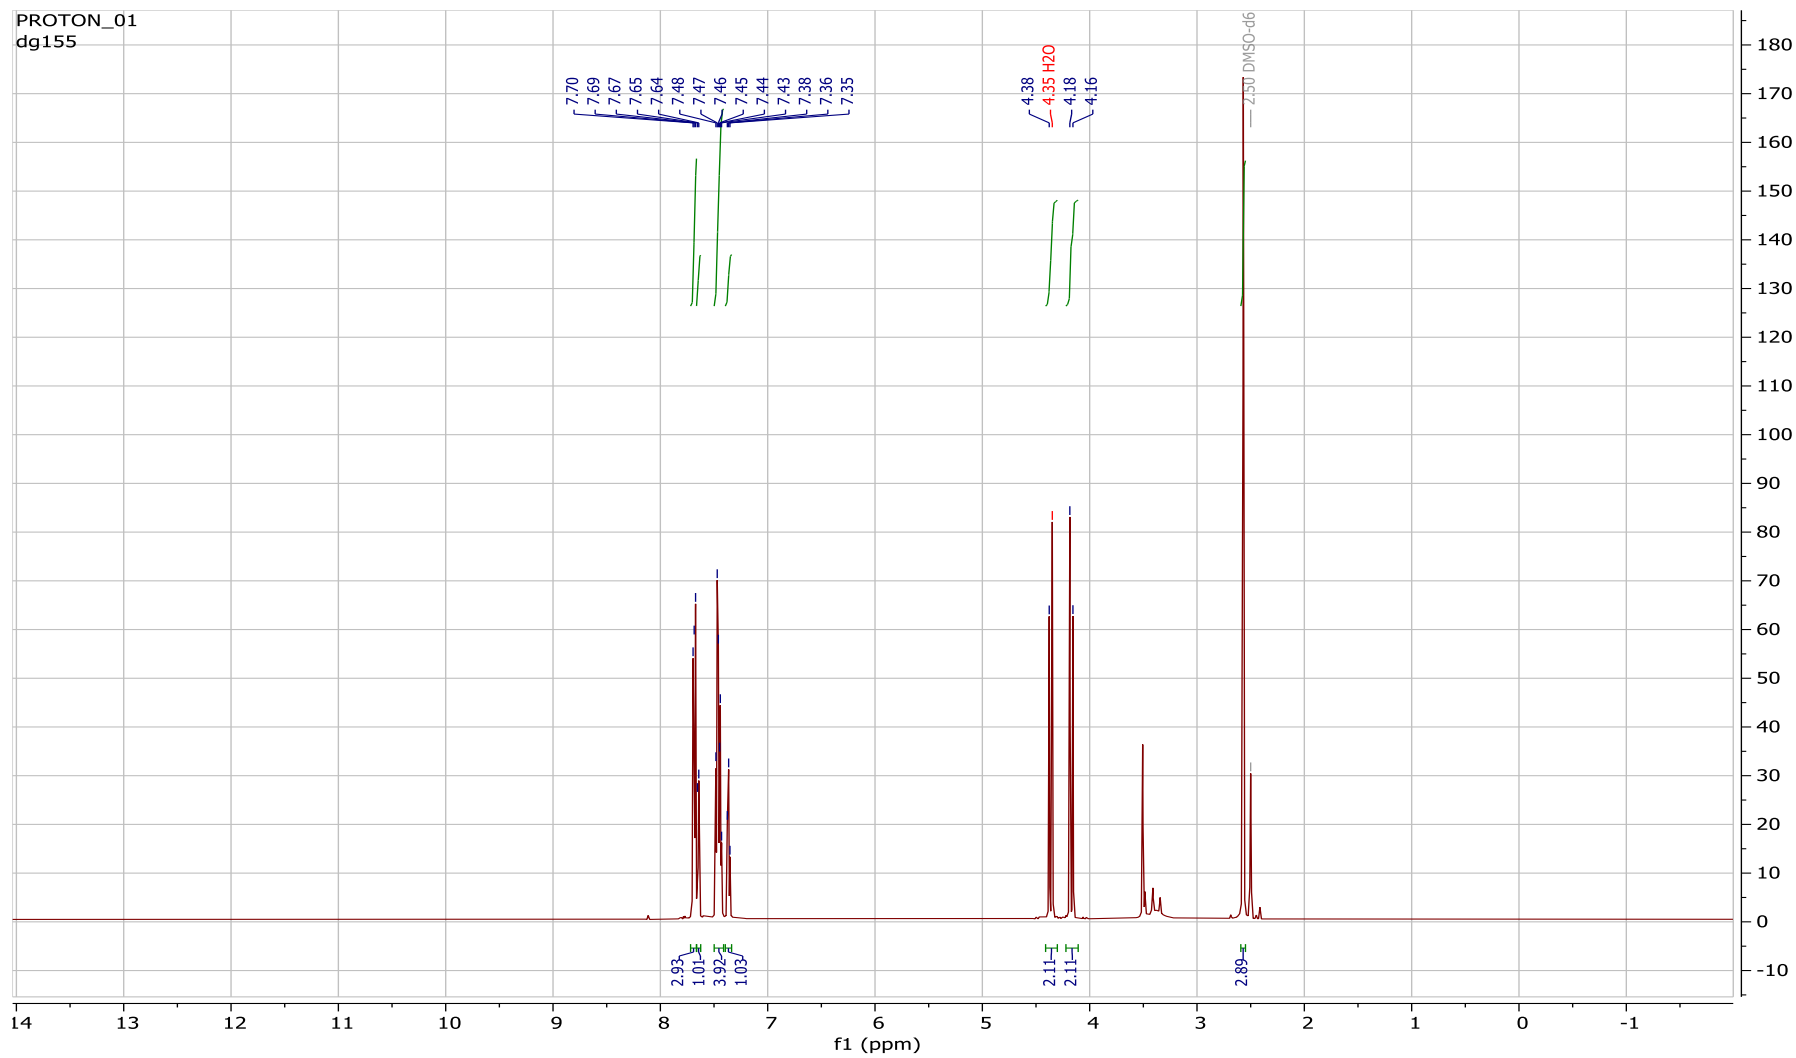

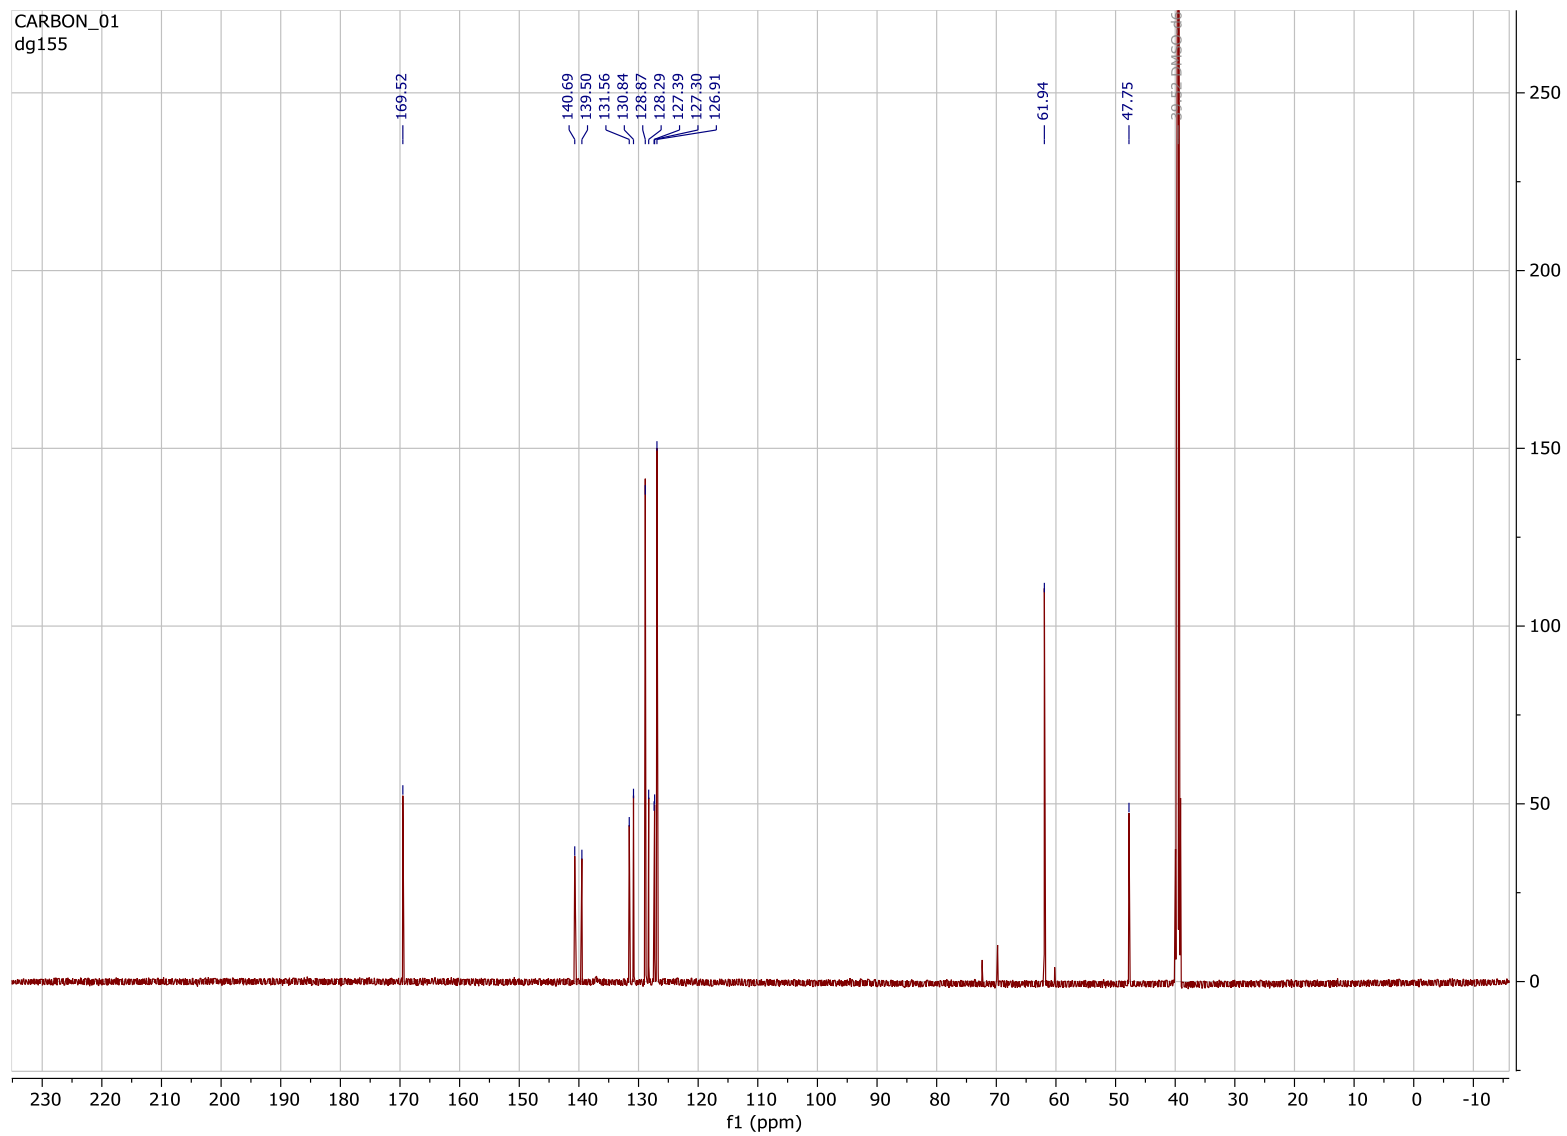

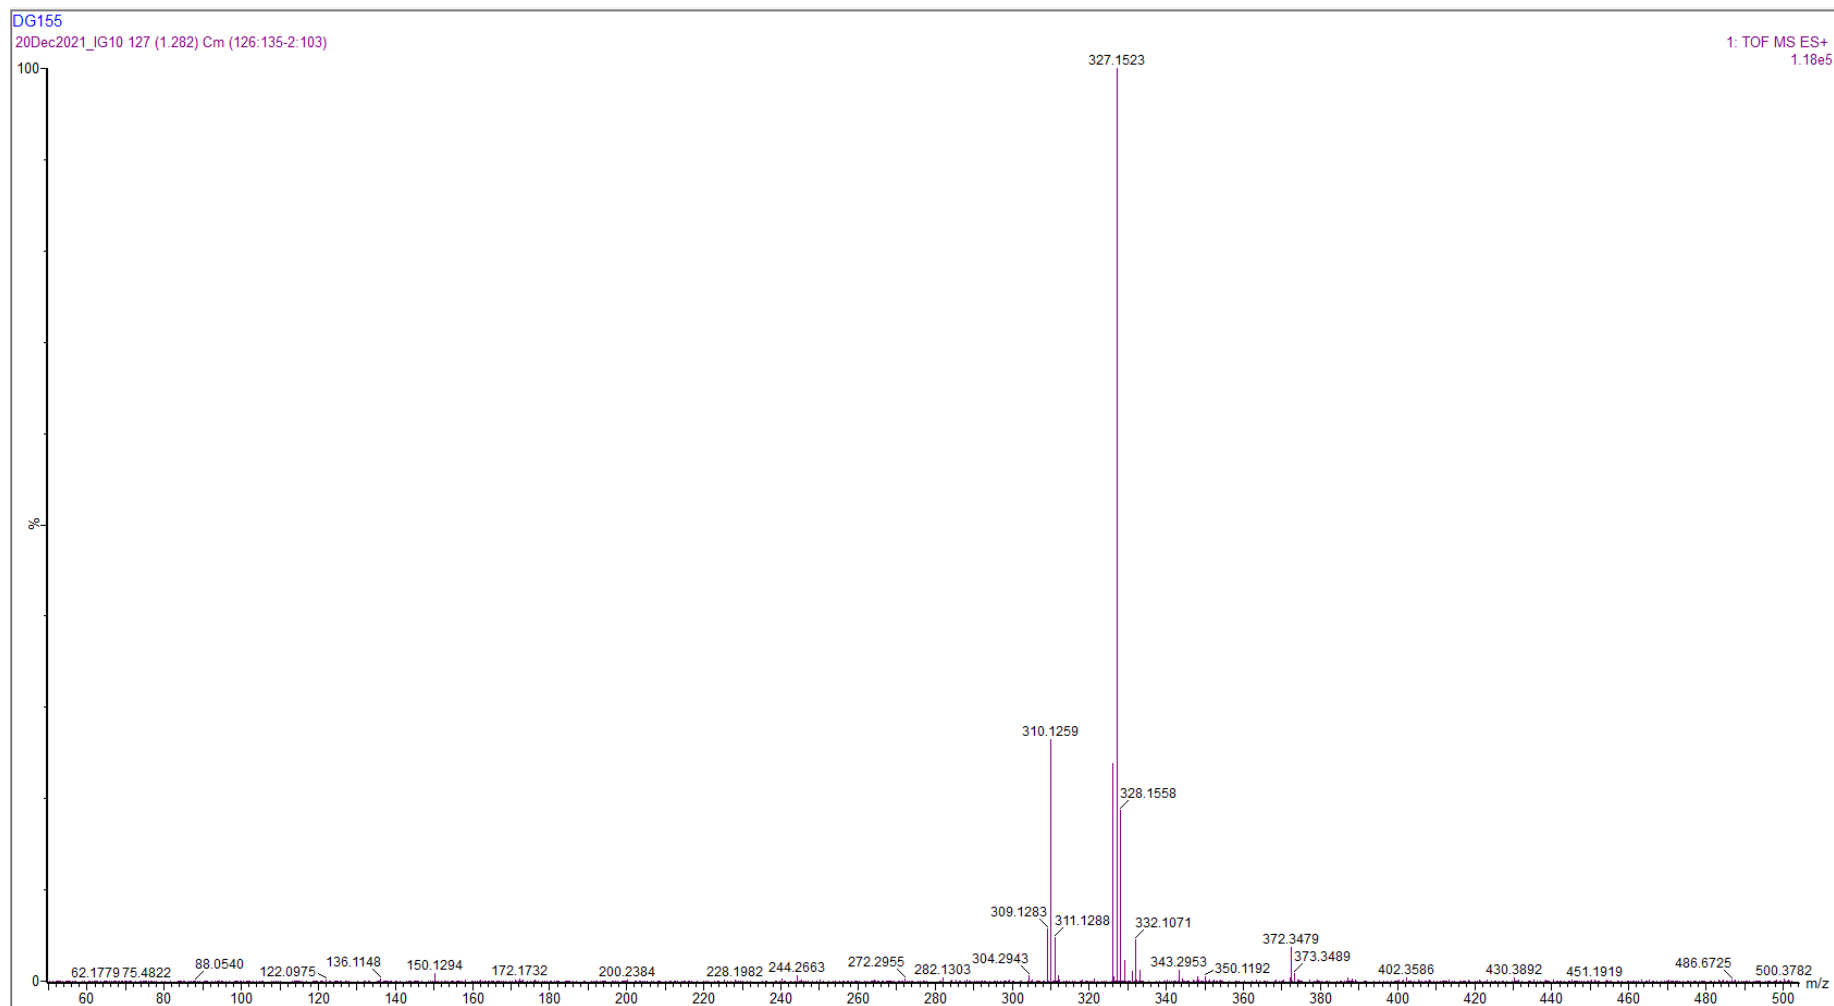

HPLC Purity > 95%

DG155

20Dec2021\_IG10

1: TOF MS ES+  
310.126 0.1000Da  
1.20e4

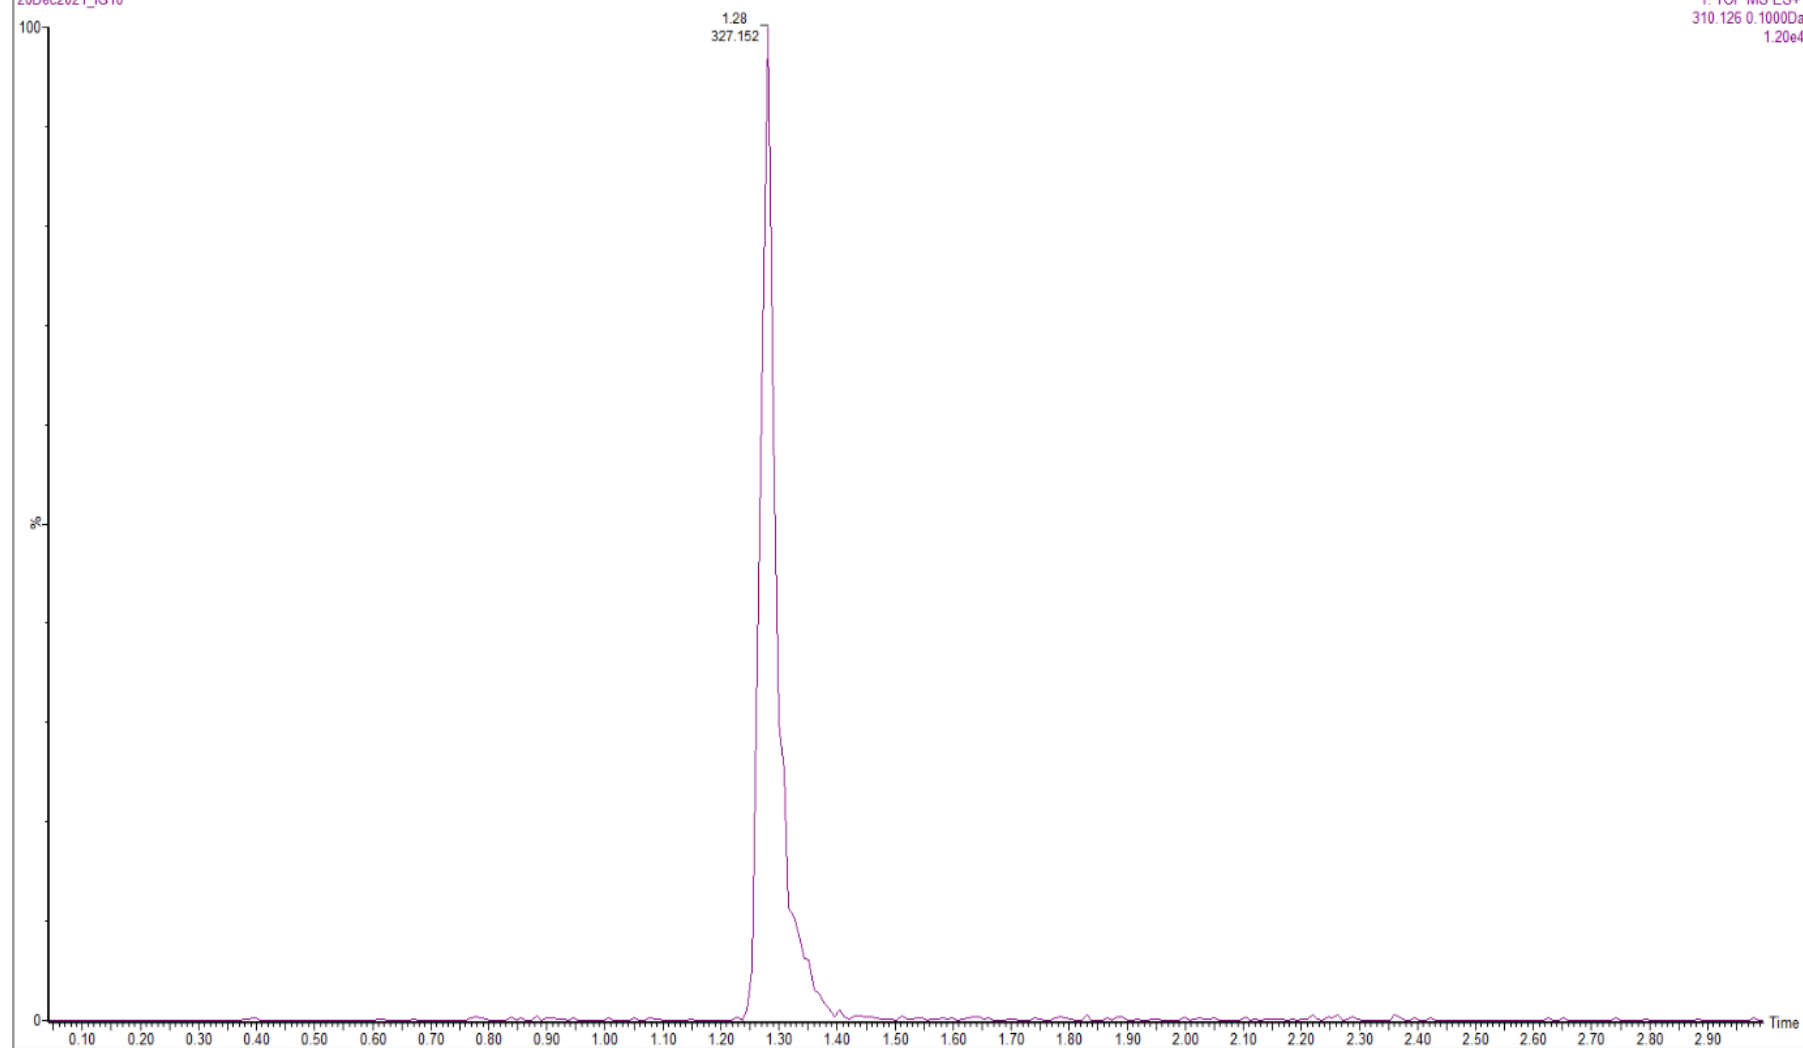

**2-(4-(*tert*-Butyl)phenyl)-6-methyl-1,3,6,2-dioxazaborocane-4,8-dione 8q**

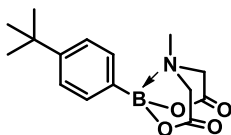

2-(4-(*tert*-butyl)phenyl)-6-methyl-1,3,6,2-dioxazaborocane-4,8-dione

Chemical Formula: C<sub>15</sub>H<sub>20</sub>BNO<sub>4</sub>

Molecular Weight: 289.1346

Yield = 299.0 mg (97 %).

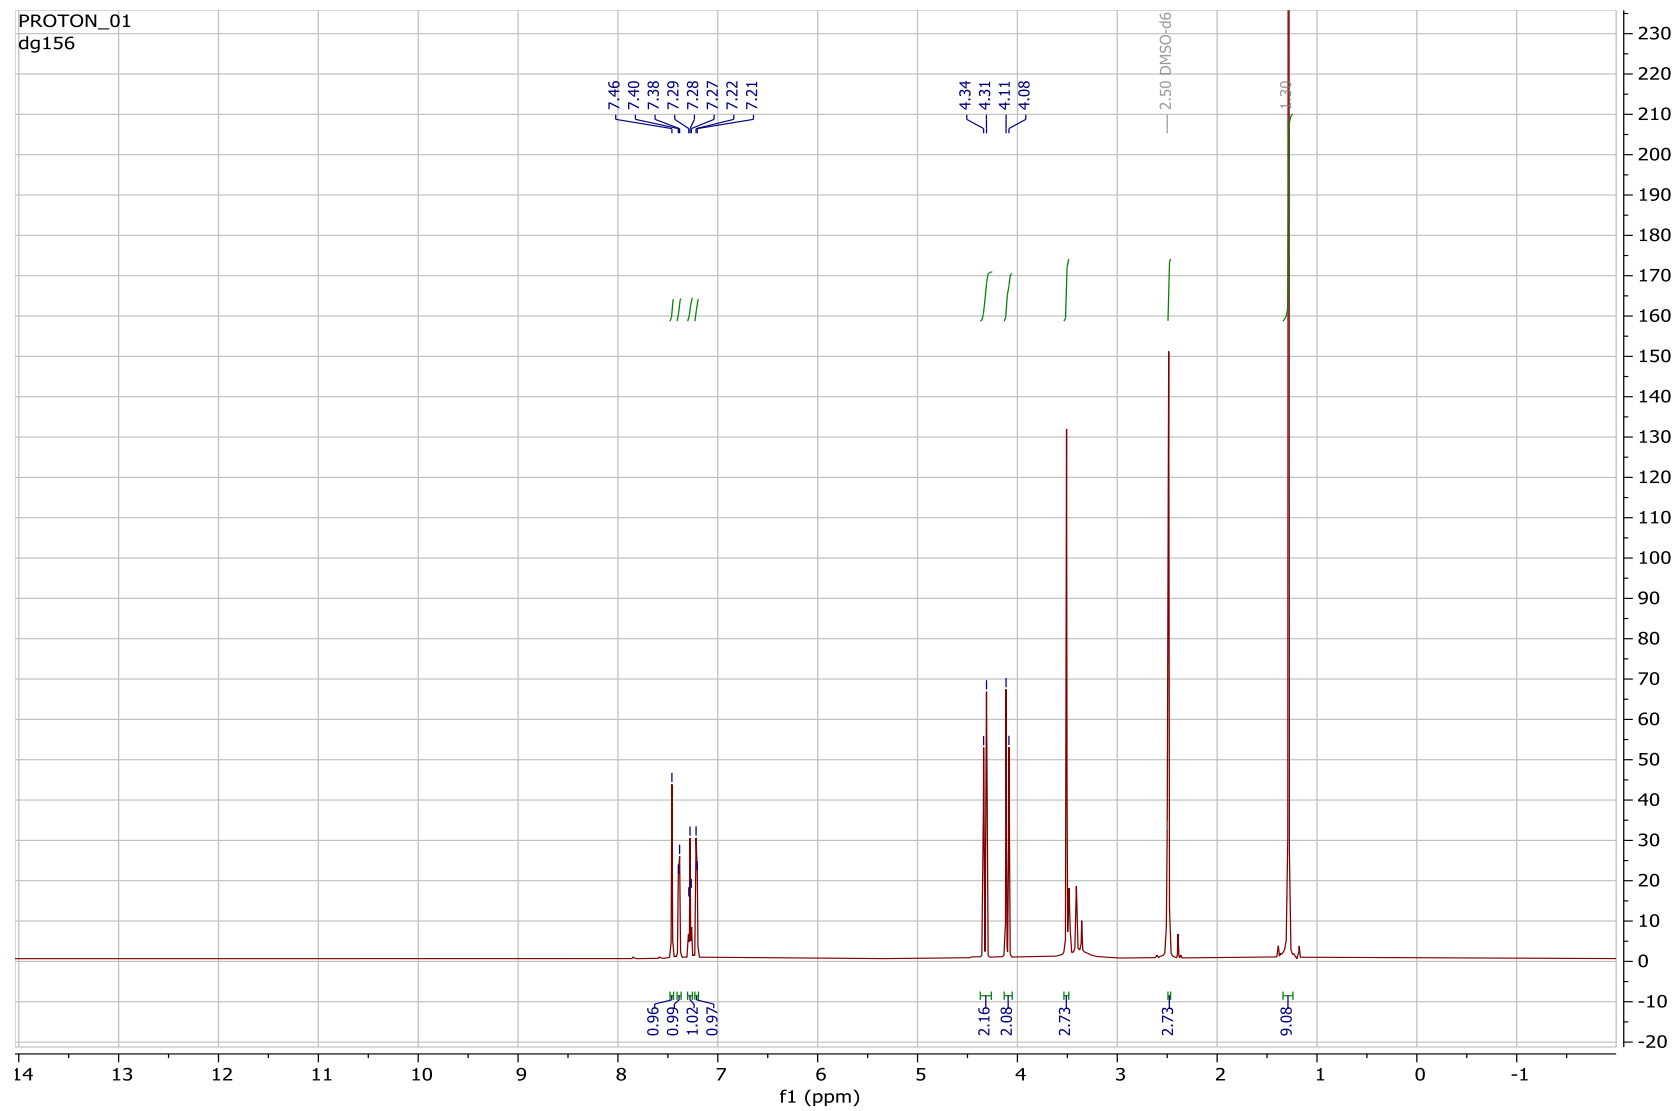

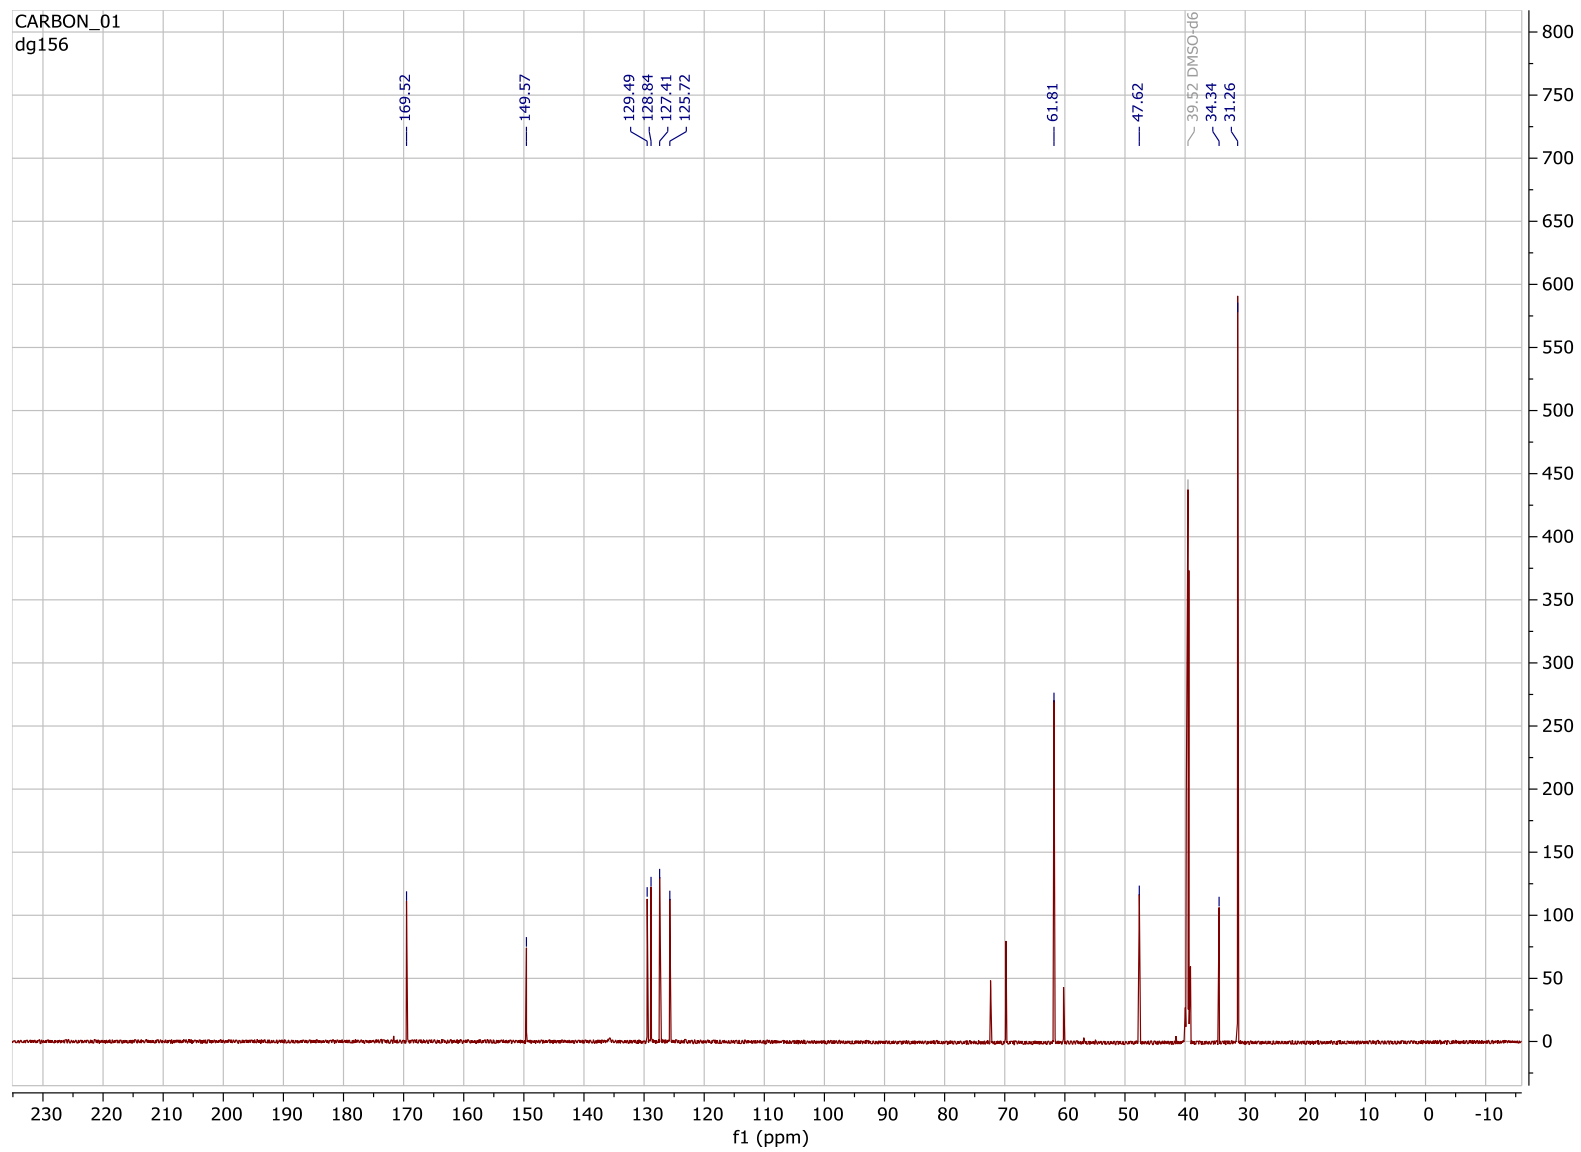



DG156

20Dec2021\_IG12 129 (1.299) Cm (127:137-2:112)

1: TOF MS ES+  
1.98e5

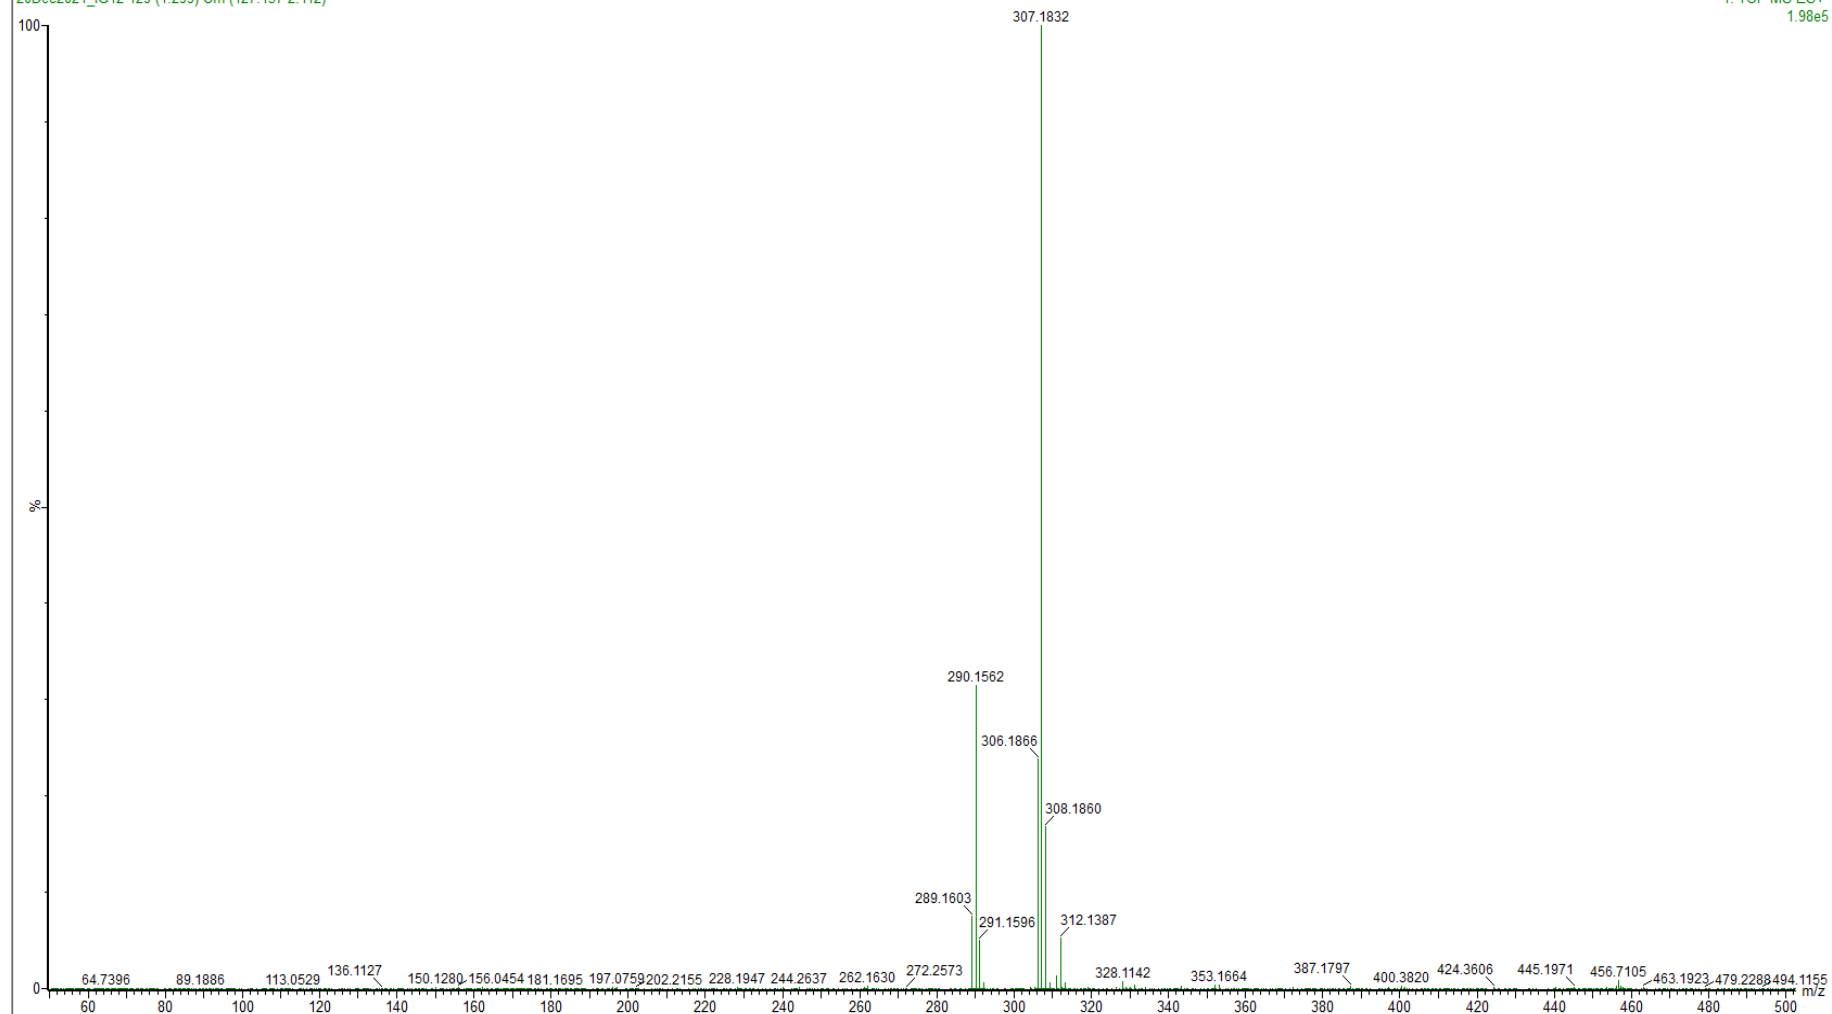

DG158

20Dec2021\_IG12

1: TOF MS ES+  
290.156 0.1000Da  
1.76e4

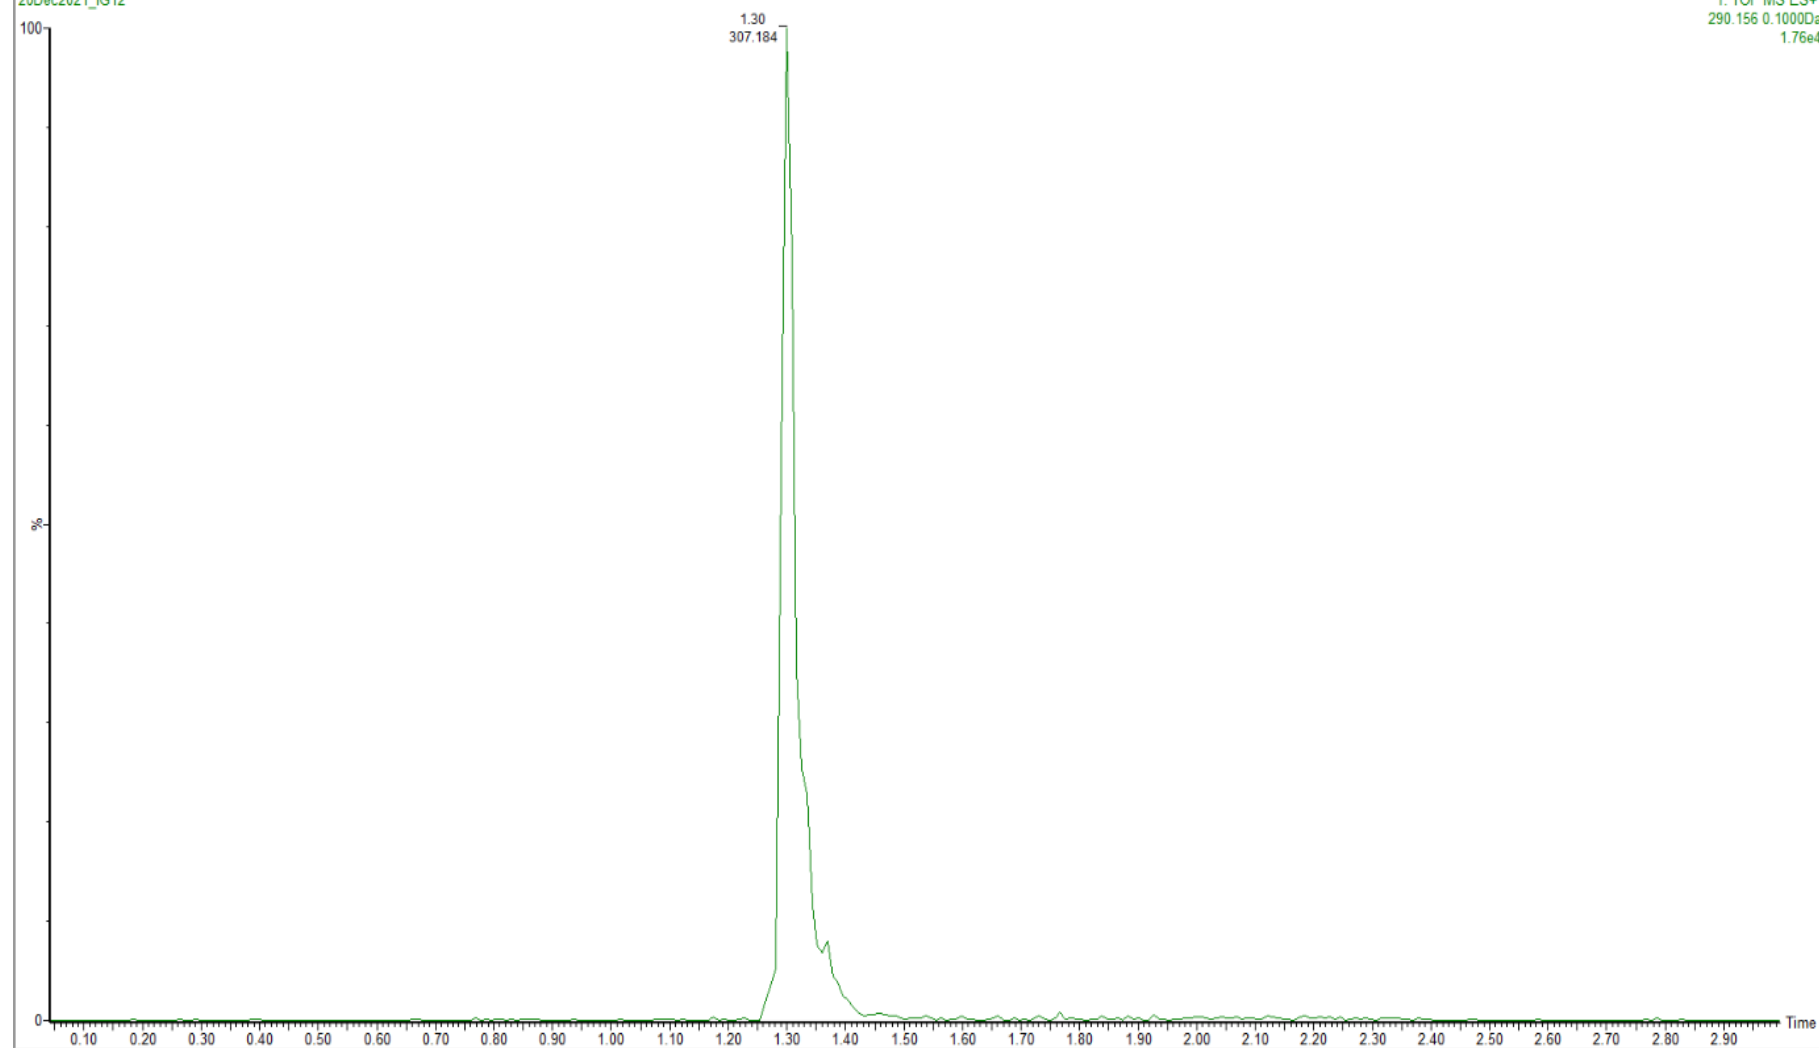

2-(benzo[d][1,3]dioxol-5-yl)-6-methyl-1,3,6,2-dioxazaborocane-4,8-dione 14

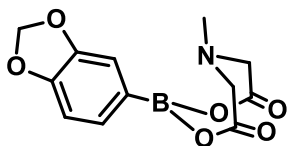

2-(benzo[d][1,3]dioxol-5-yl)-6-methyl-1,3,6,2-dioxazaborocane-4,8-dione

Chemical Formula:  $C_{12}H_{12}BNO_6$

Molecular Weight: 277.0378

Yield = 187.0 mg (68%)

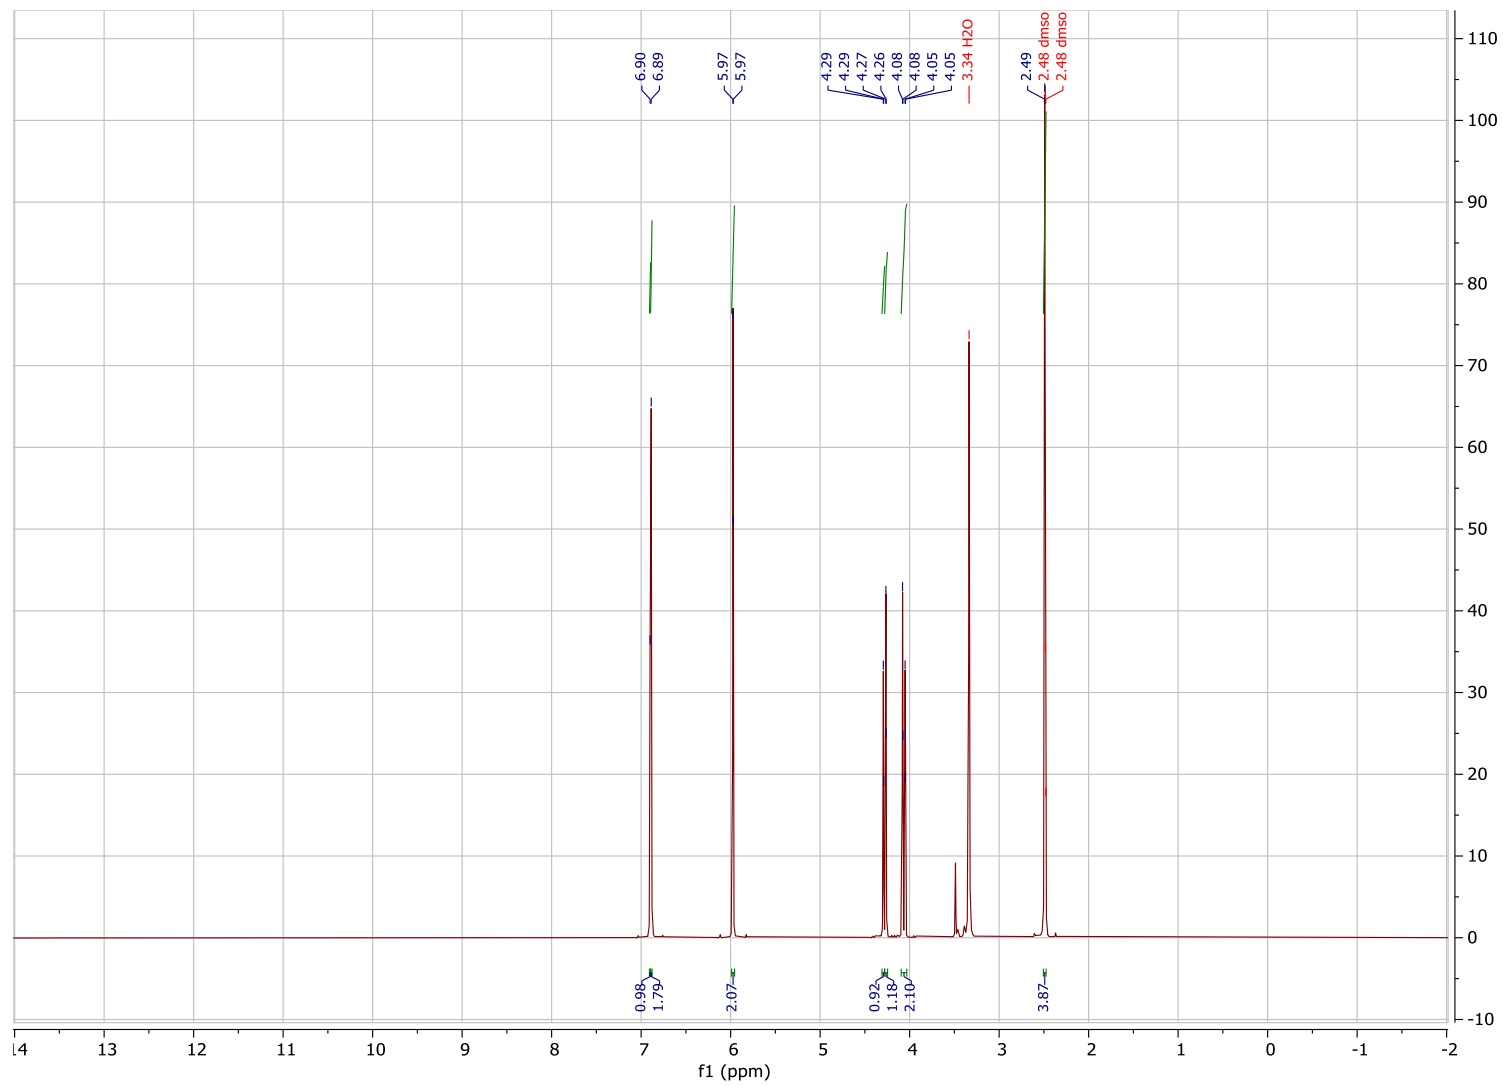

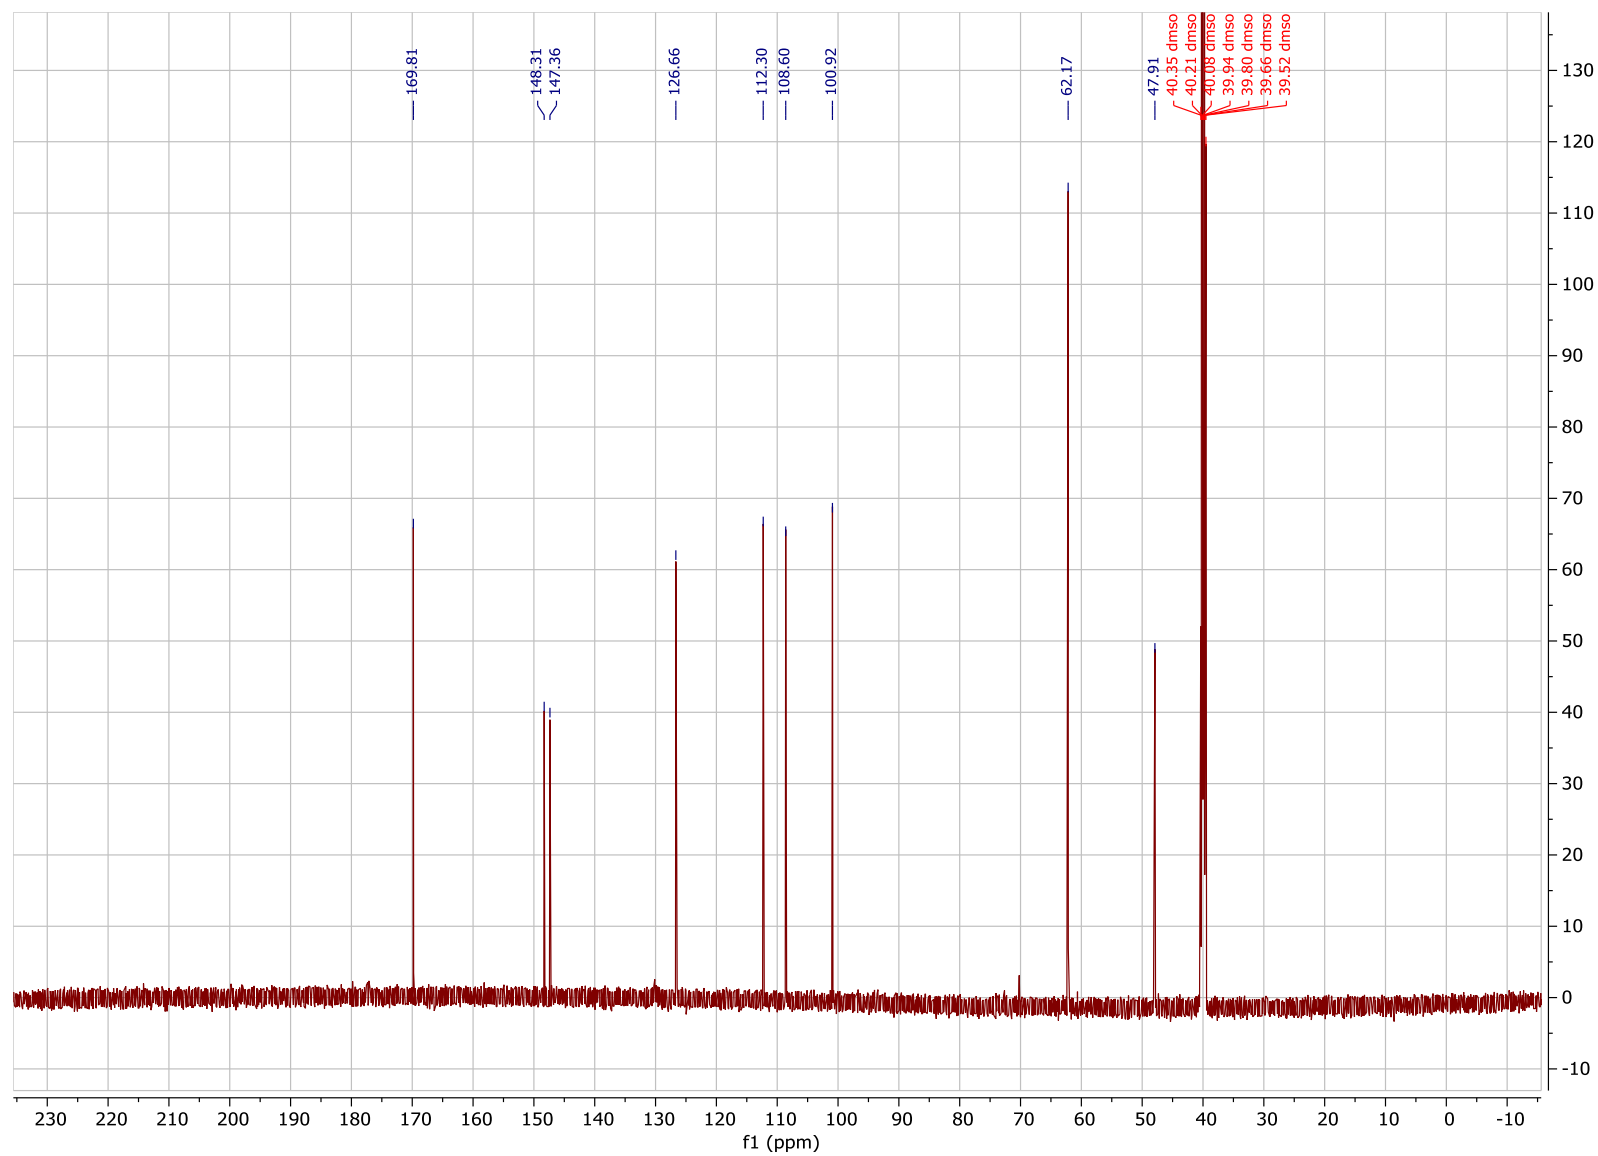

AMMIDA-002

ANDREW\_MCGOWN000408 20 (0.414)

1: TOF MS ES+  
1.84e4

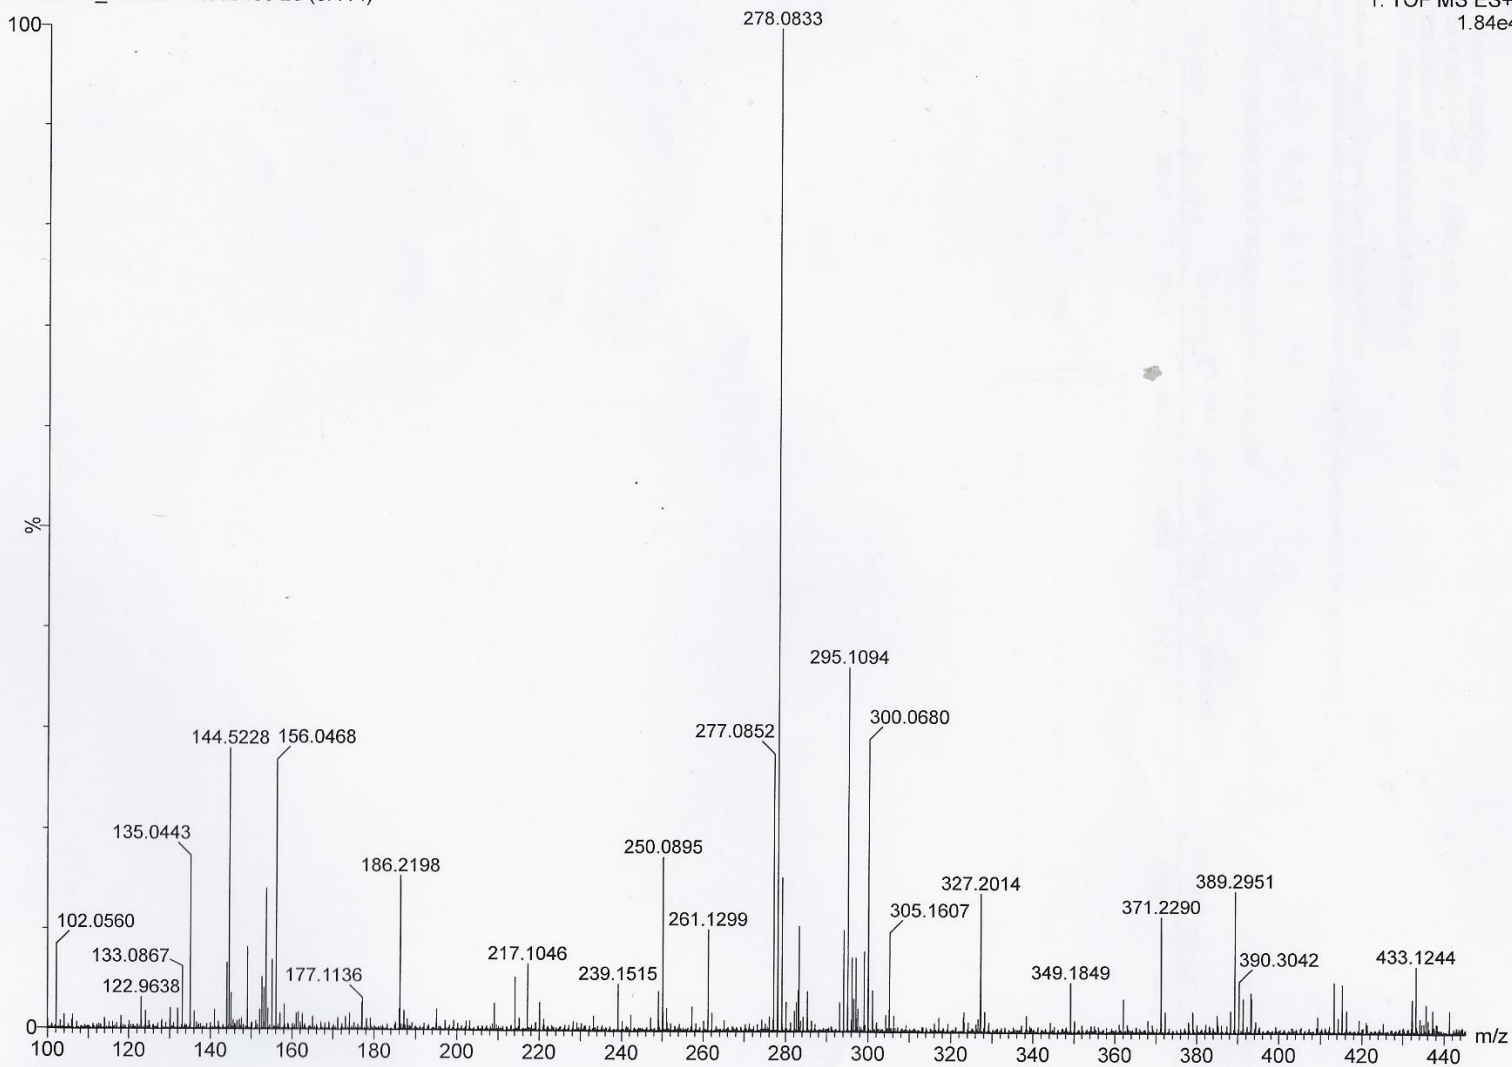

**2-(3,5-Dimethylisoxazol-4-yl)-6-methyl-1,3,6,2-dioxazaborocane-4,8-dione 9 PEG**

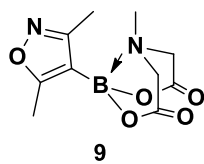

**2-(3,5-dimethylisoxazol-4-yl)-6-methyl-1,3,6,2-dioxazaborocane-4,8-dione**

**Chemical Formula:**  $\text{C}_{10}\text{H}_{13}\text{BN}_2\text{O}_5$

**Molecular Weight: 252.03**

Yield = 80.2 mg (32%)

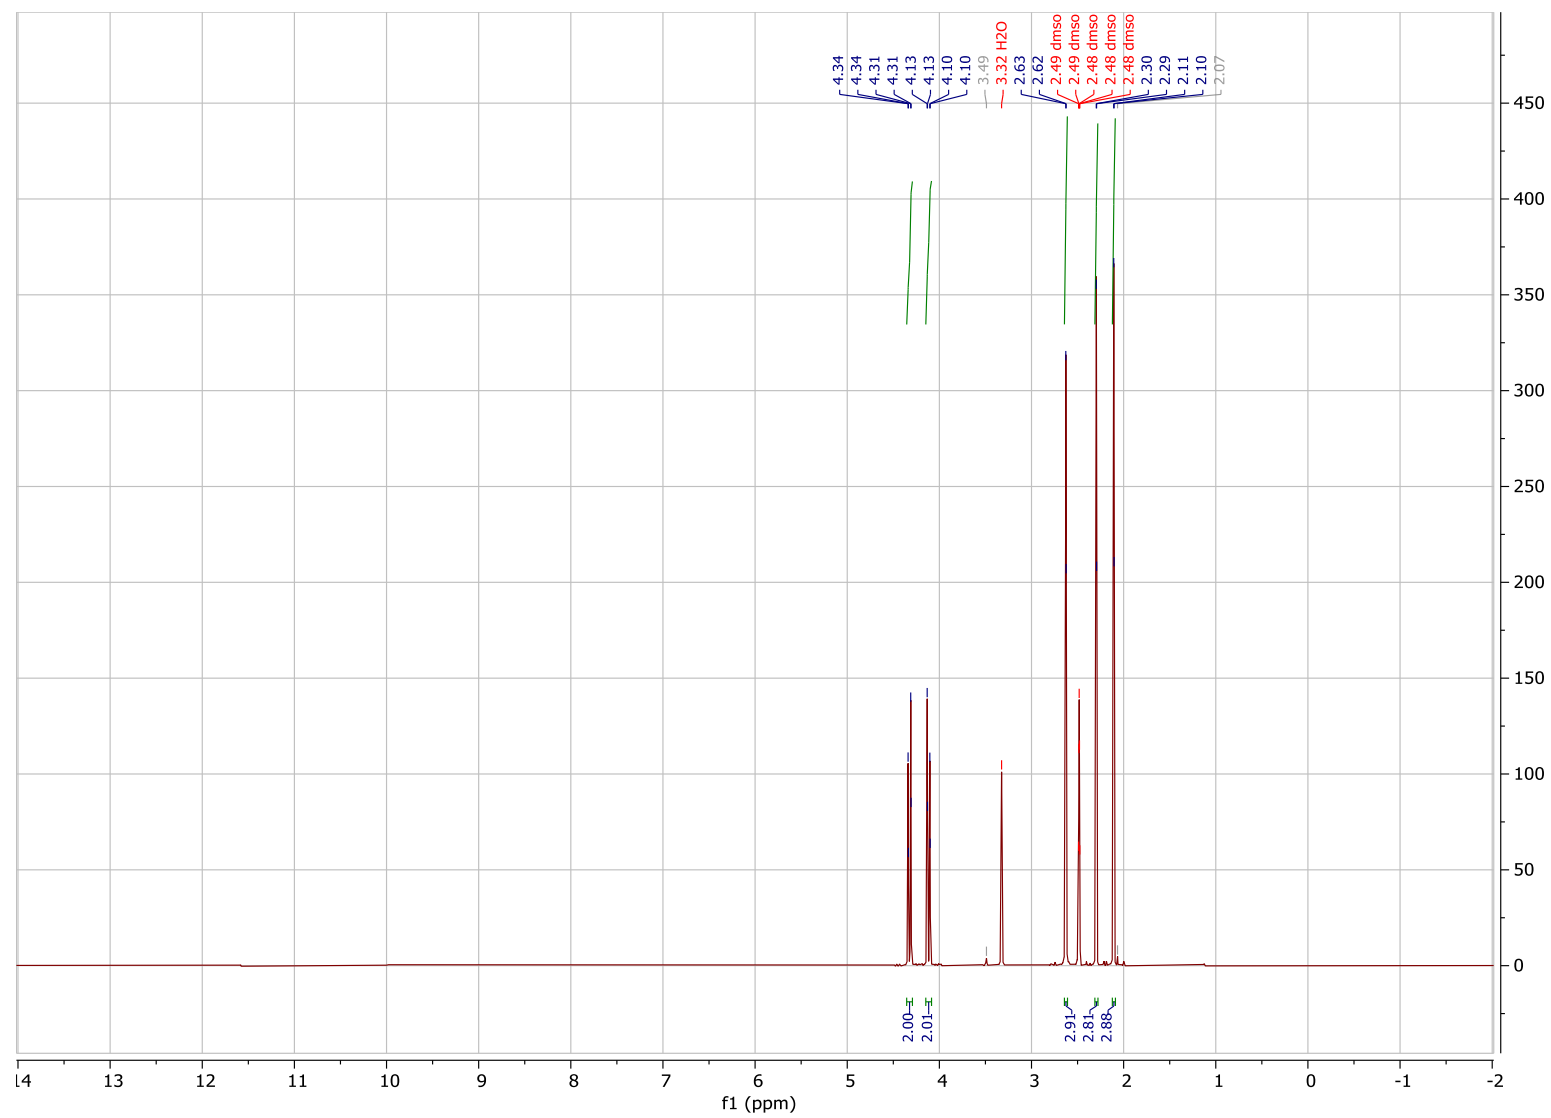



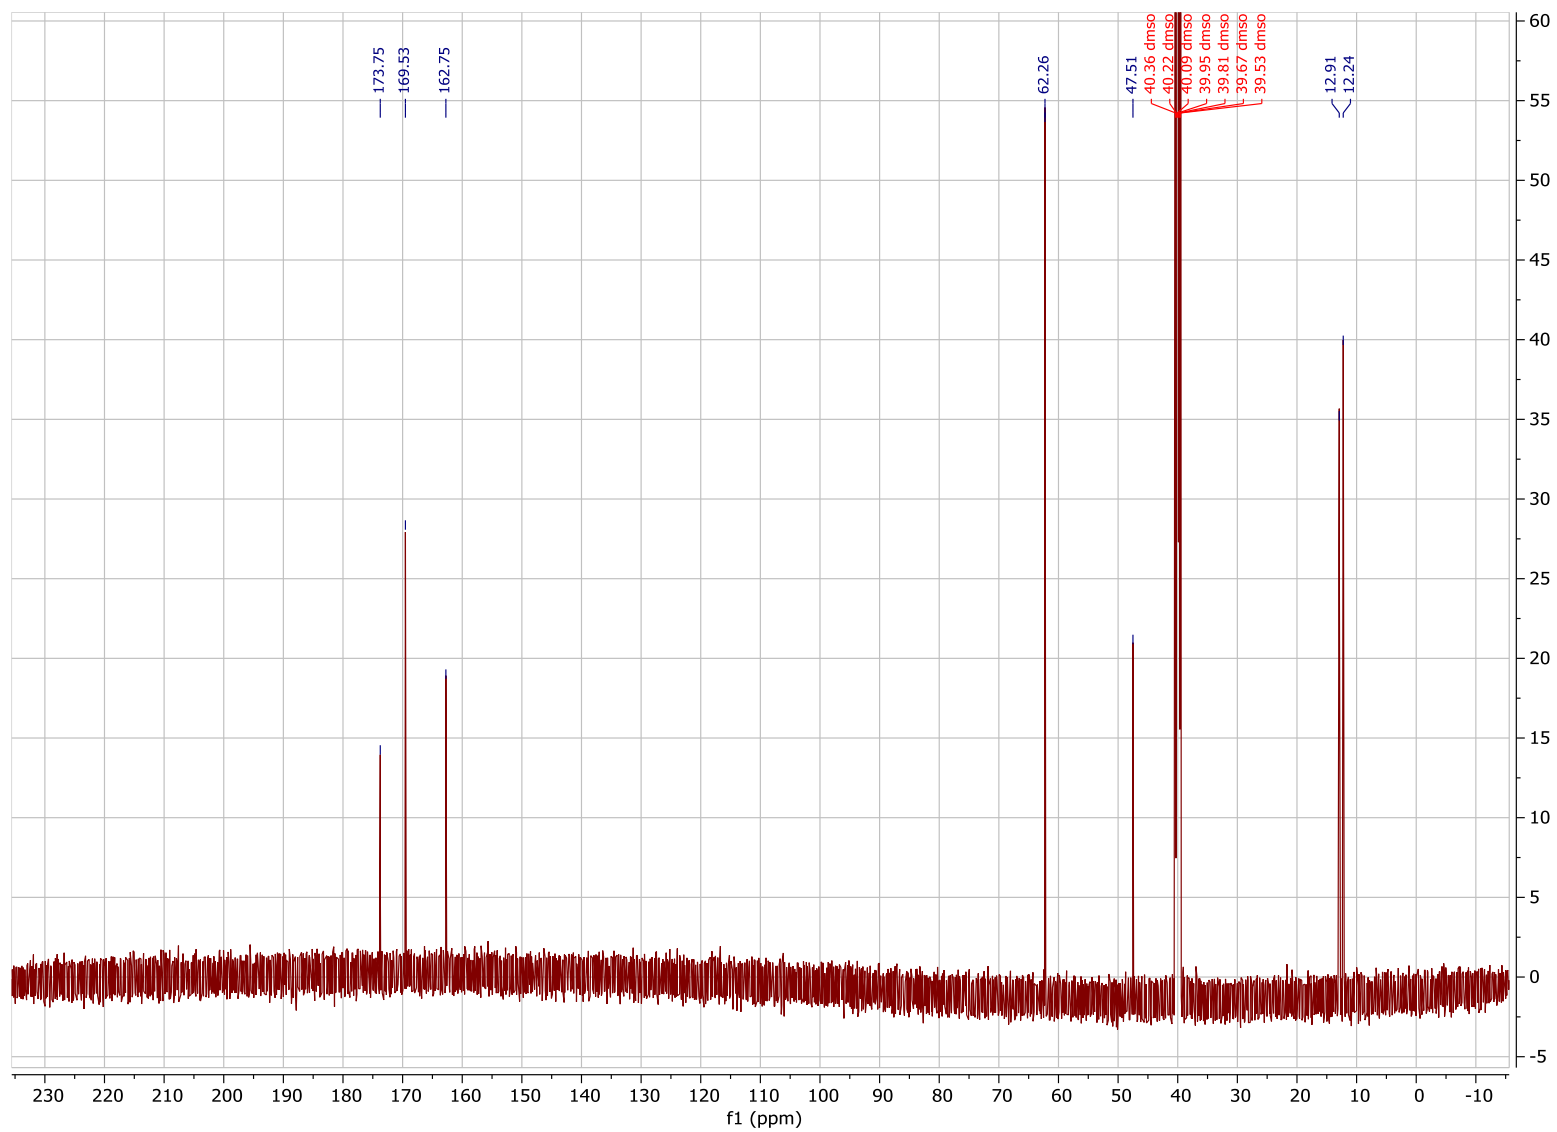

AMMIDA-003

ANDREW\_MCGOWN000409 10 (0.226)

1: TOF MS ES+  
3.57e5

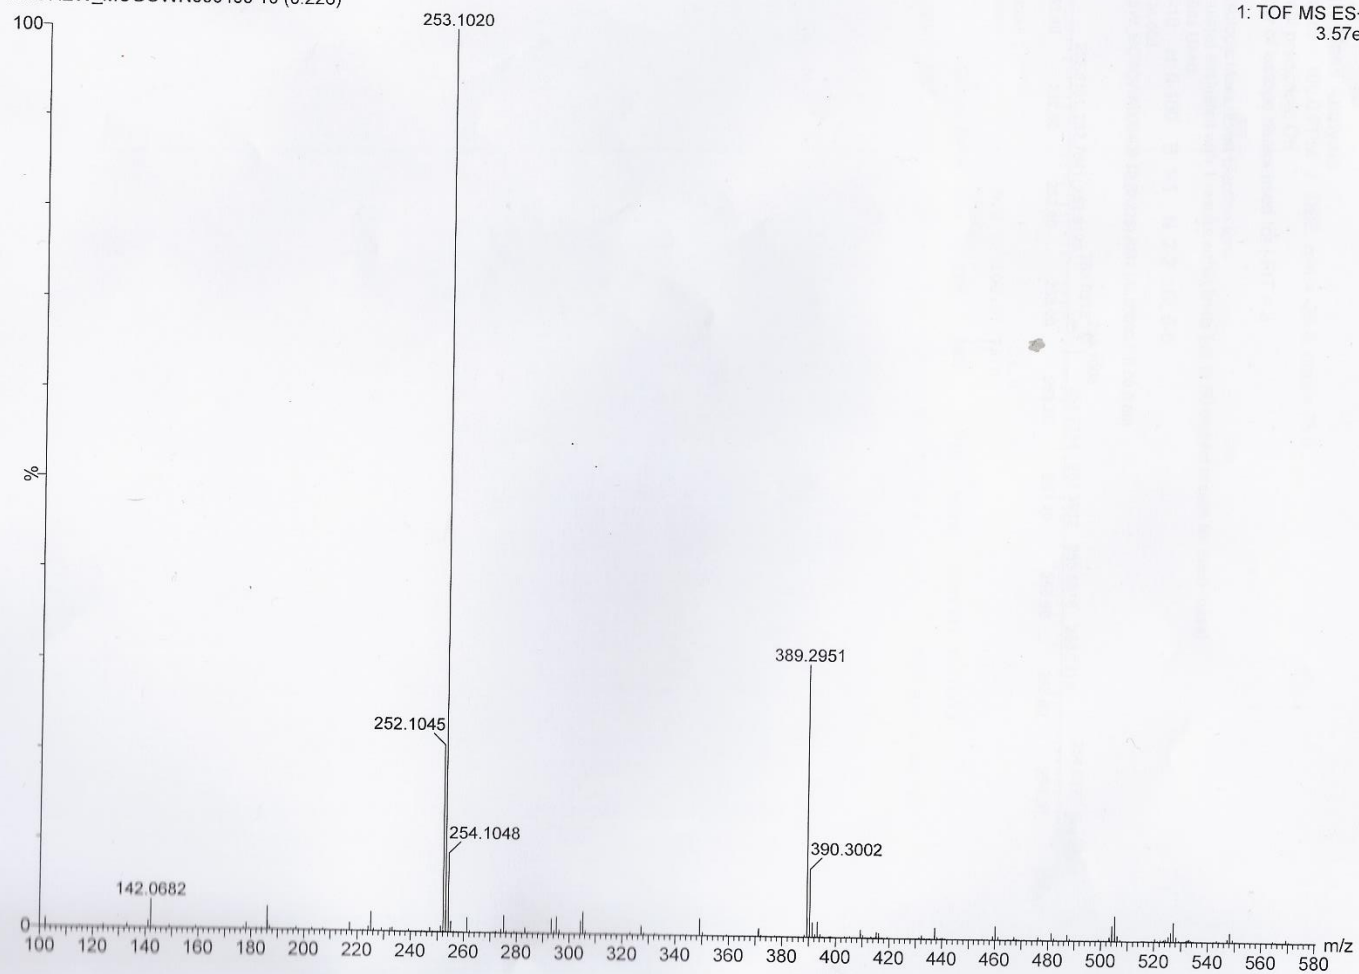

**2-(2-Hydroxyphenyl)-6-methyl-1,3,6,2-dioxazaborocane-4,8-dione 15**

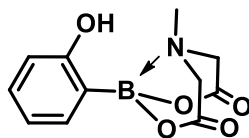

**2-(2-hydroxyphenyl)-6-methyl-1,3,6,2-dioxazaborocane-4,8-dione**

**Chemical Formula: C<sub>11</sub>H<sub>12</sub>BNO<sub>5</sub>**

**Molecular Weight: 249.0277**

Yield = 26.2 mg (11%)

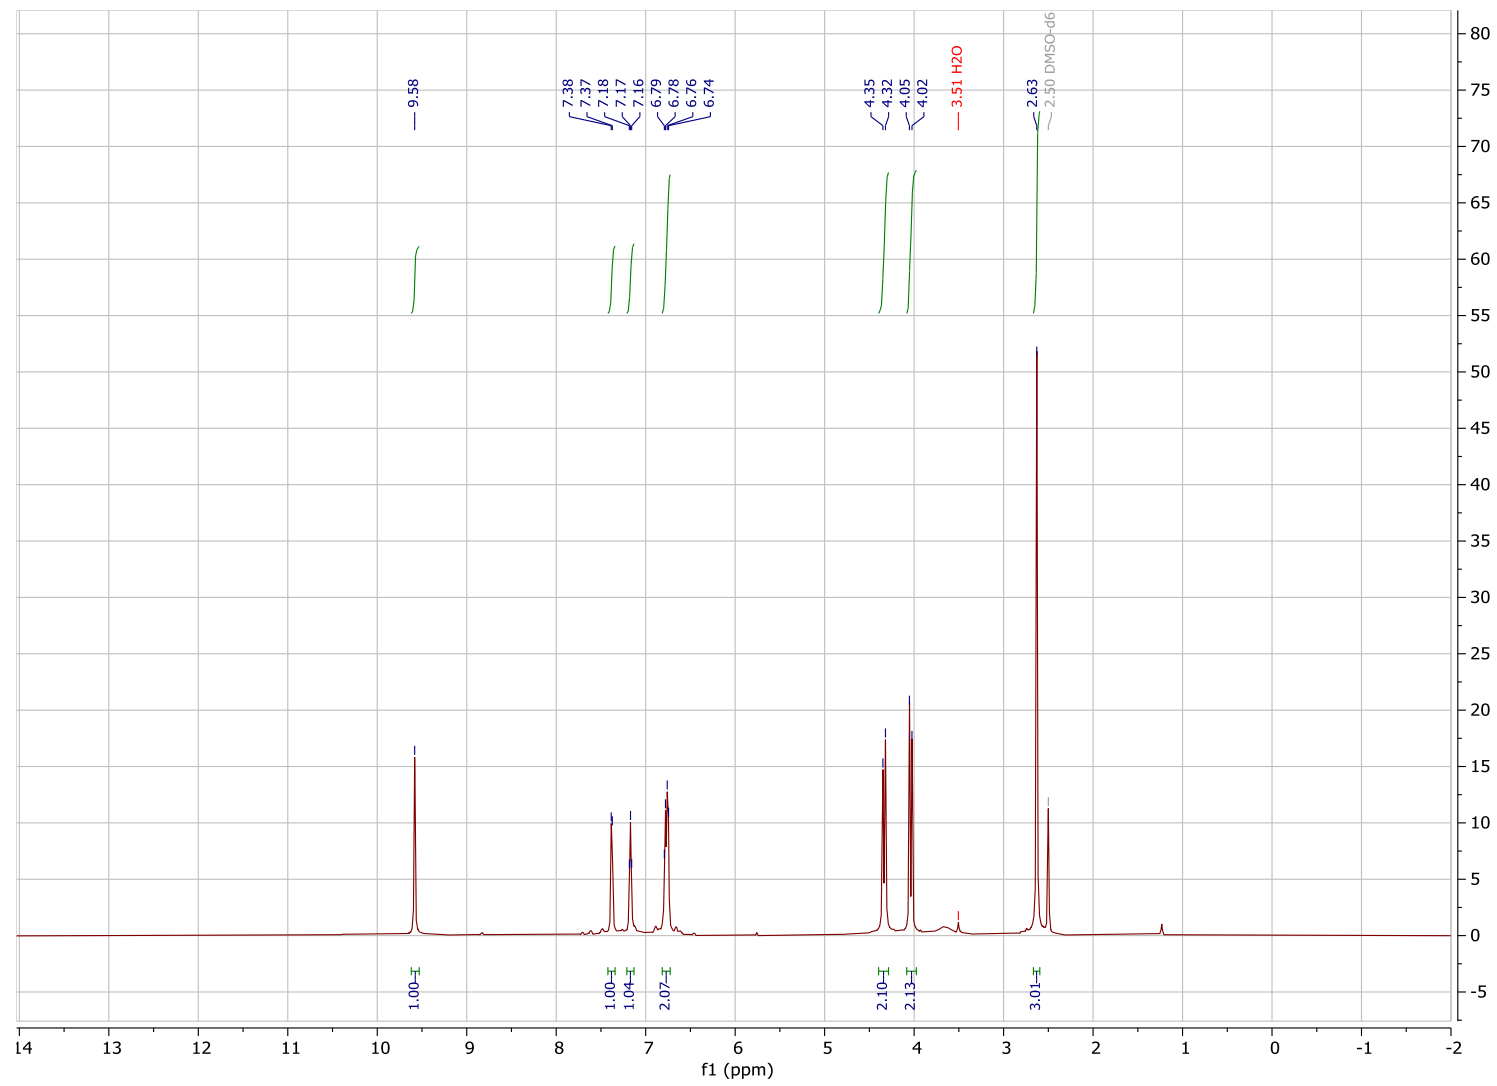

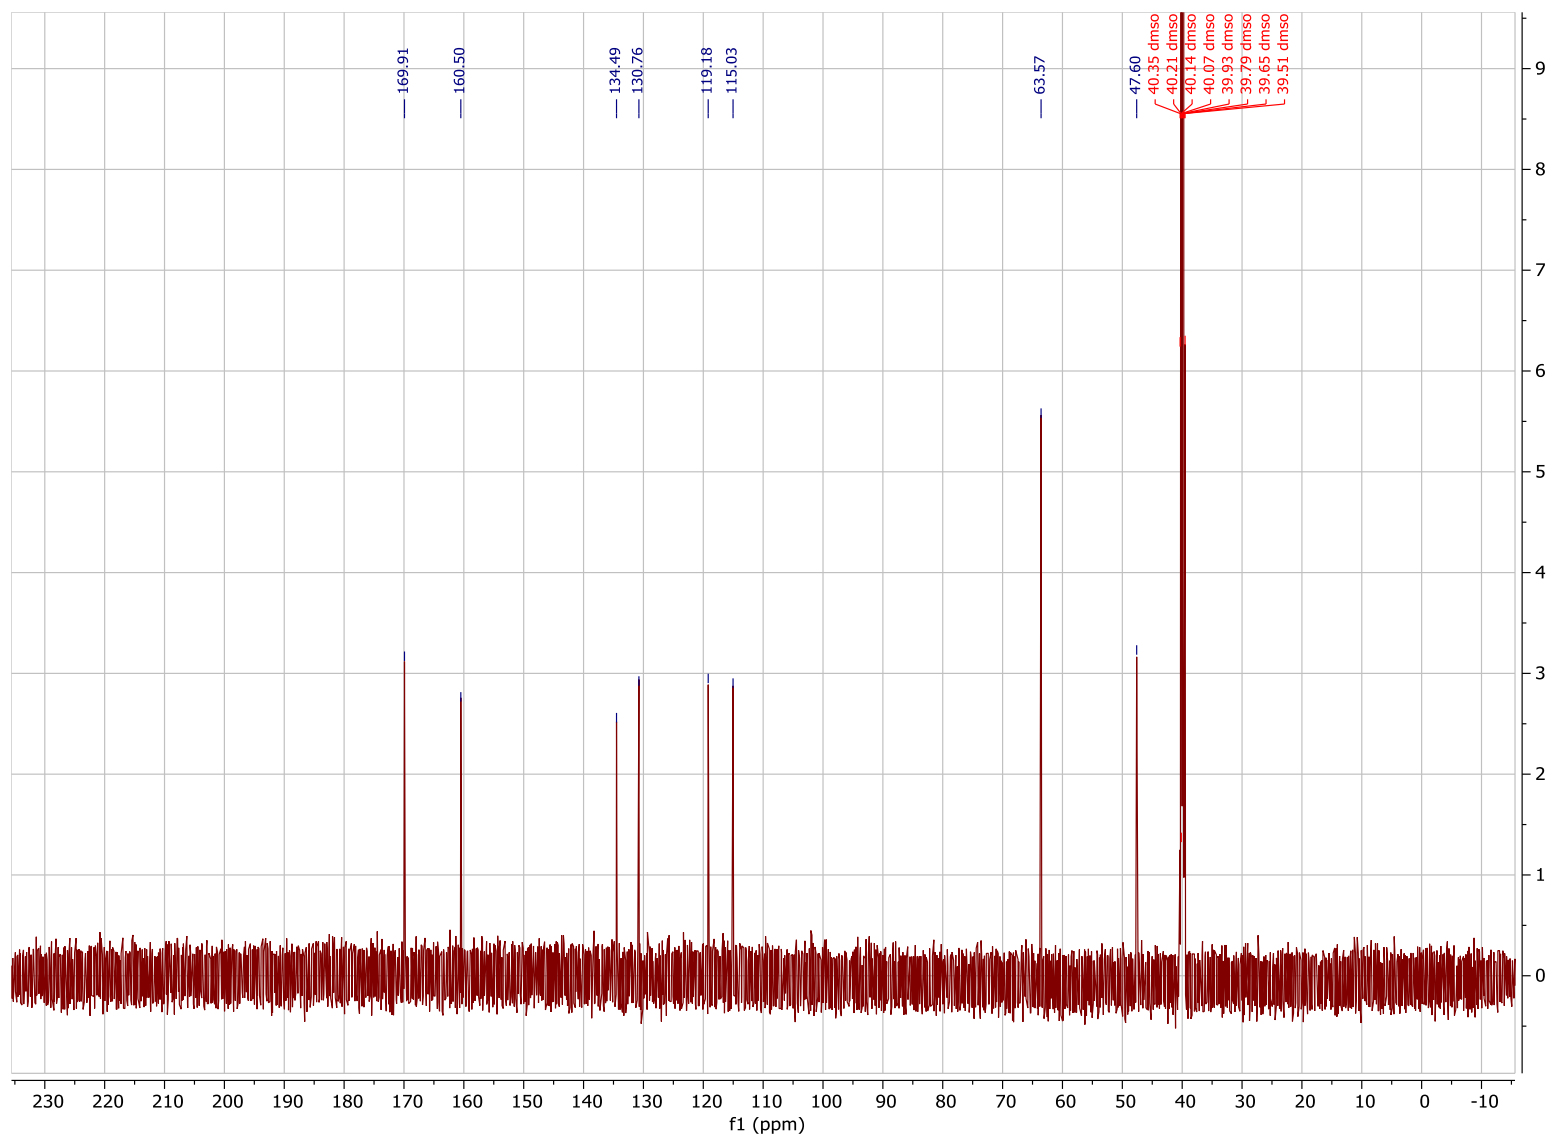

AMMIDA004

ANDREW\_MCGOWN000410 57 (1.139) Cm (47:64)

1: TOF MS ES+  
3.44e5

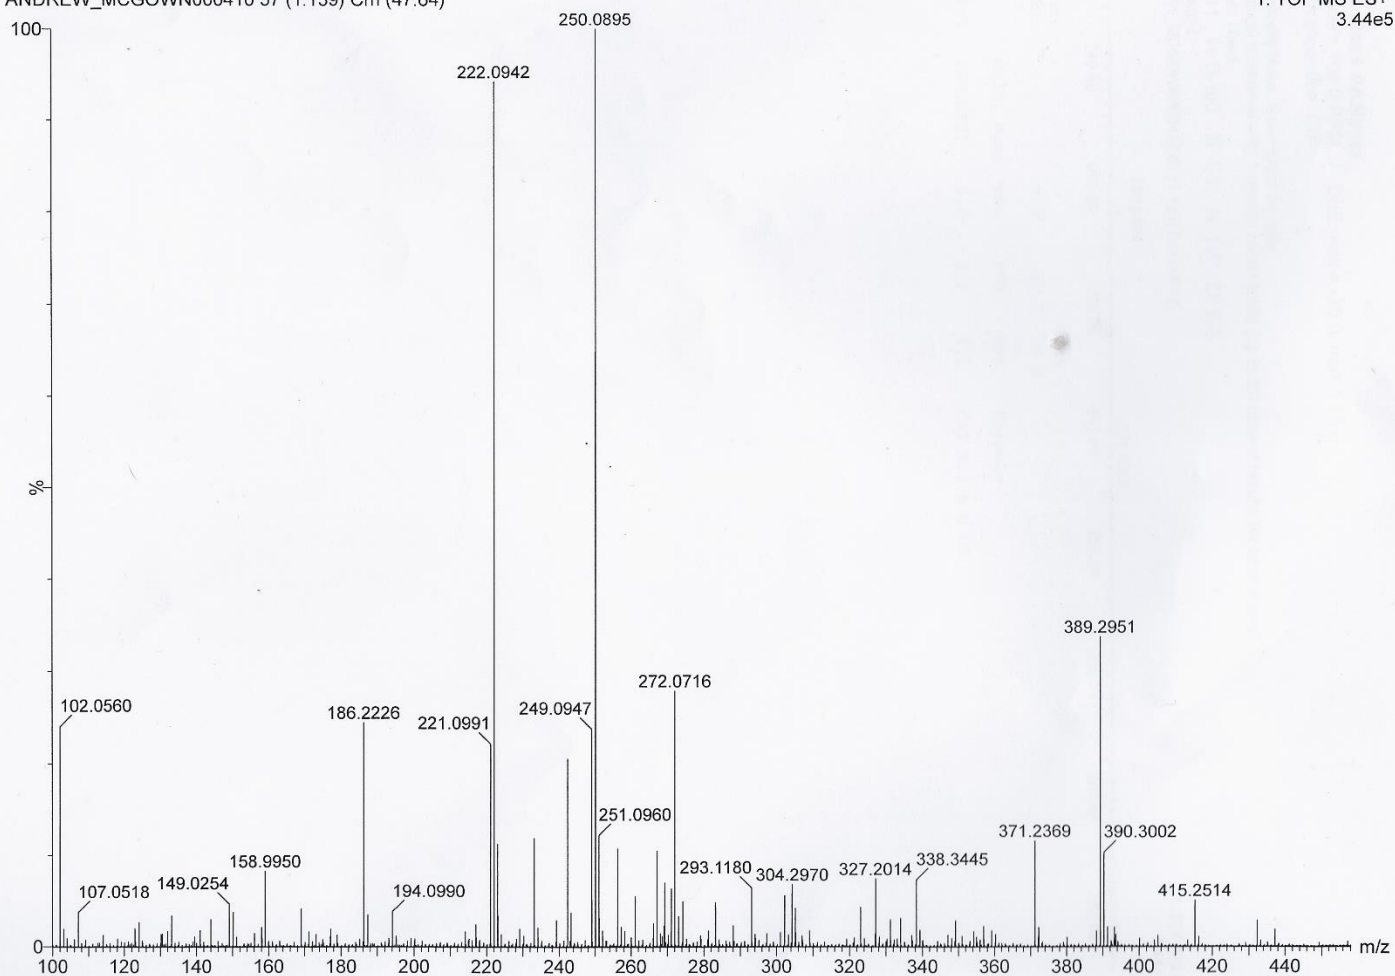

**6-methyl-2-(perfluorophenyl)-1,3,6,2-dioxazaborocane-4,8-dione 8r**

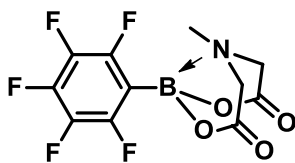

6-methyl-2-(perfluorophenyl)-1,3,6,2-dioxazaborocane-4,8-dione

Chemical Formula:  $C_{11}H_7BF_5NO_4$

Molecular Weight: 322.9806

Yield = 68.2 mg (21%)

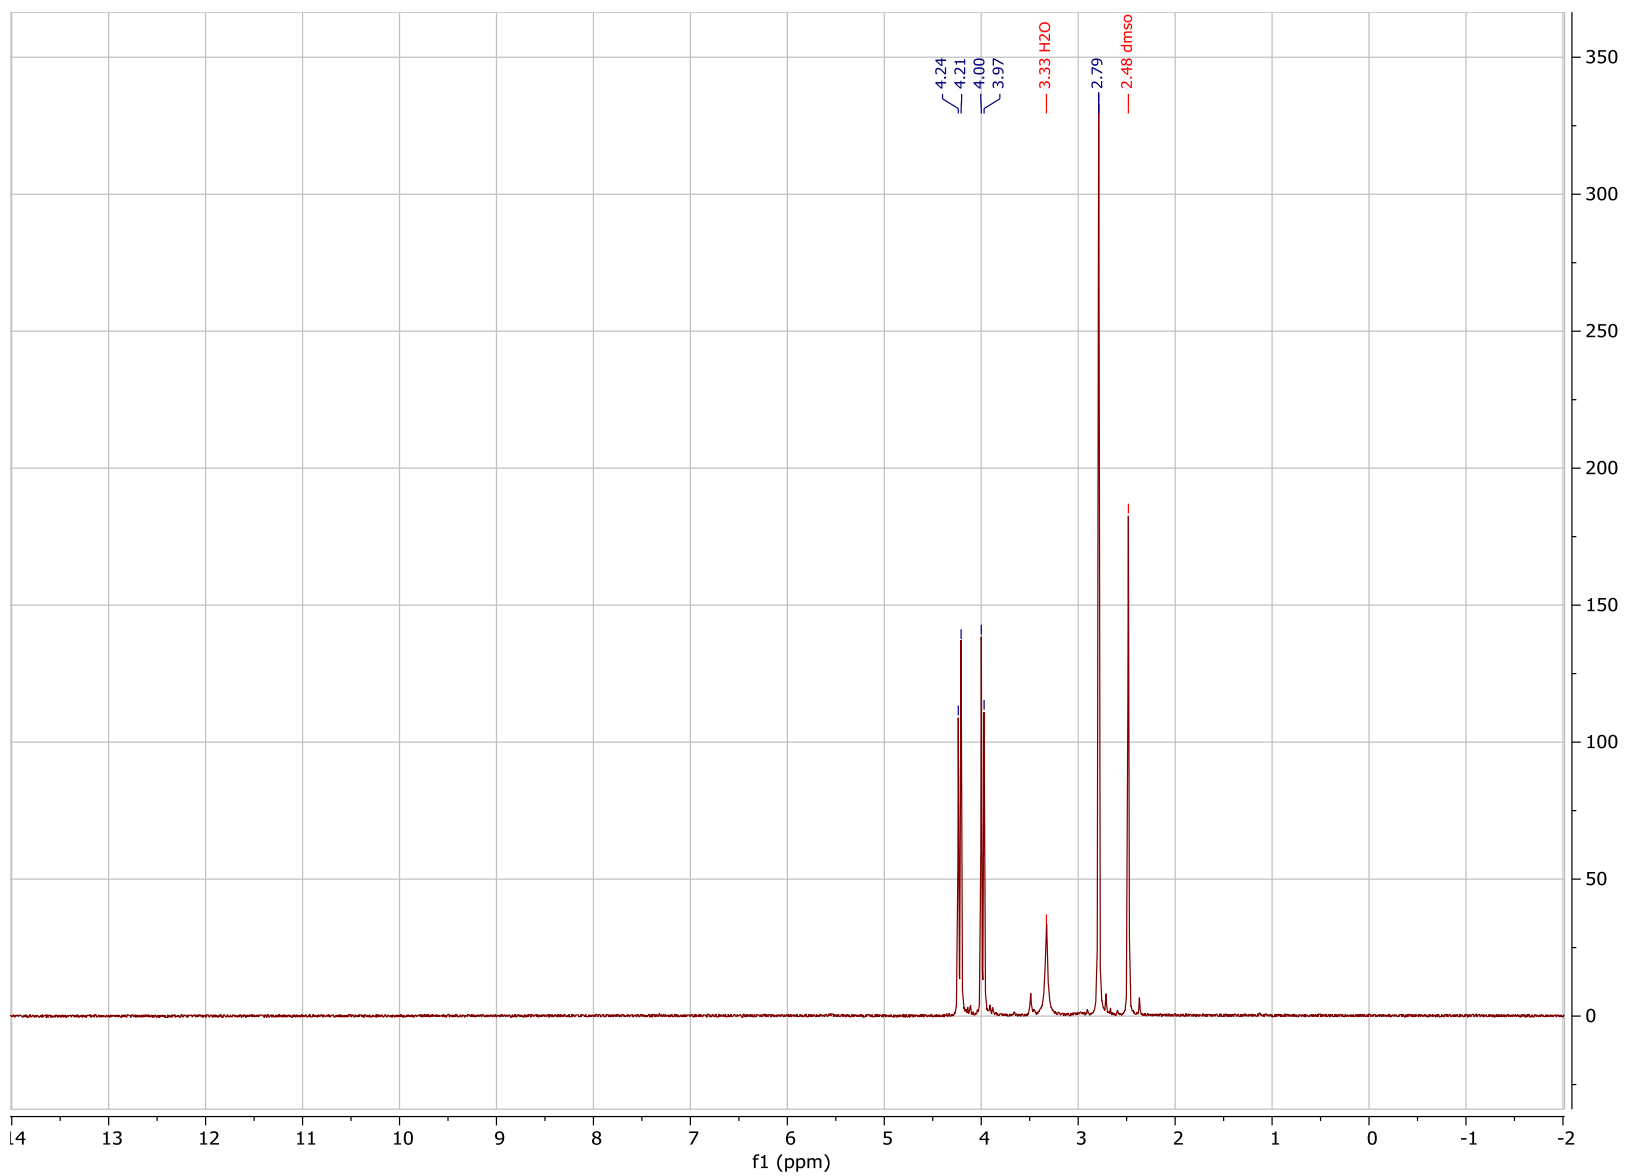



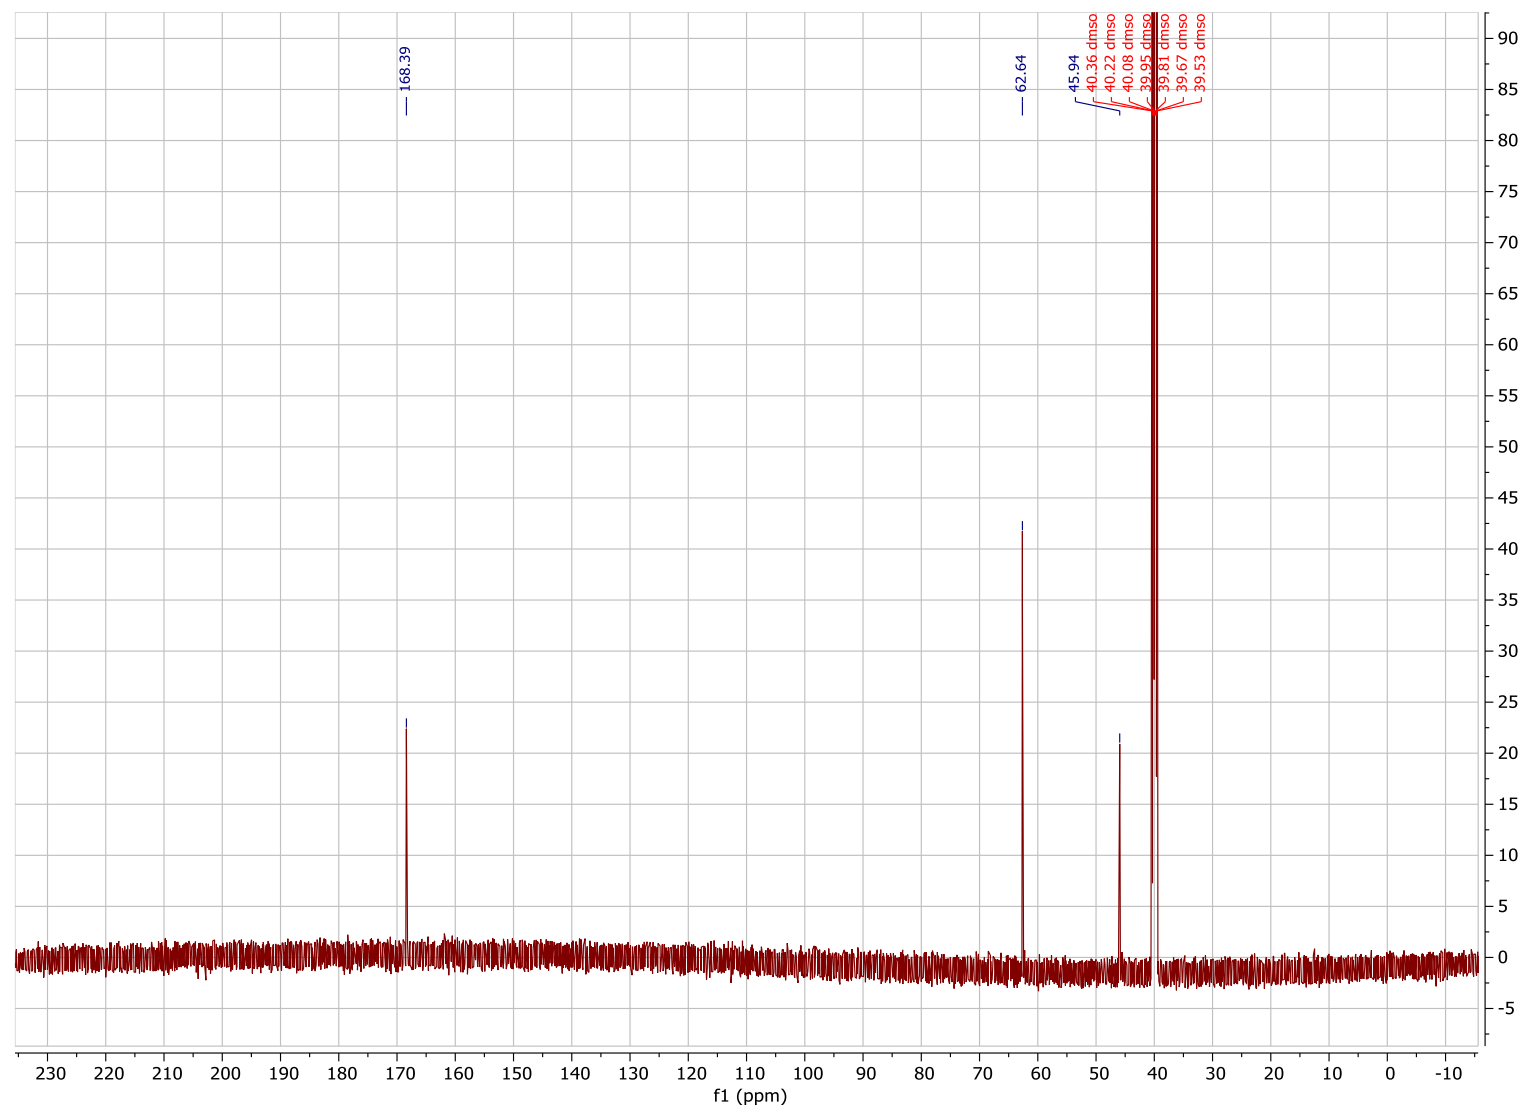

Supplement: s1 [file s1]
